# Supplementary material for: Physiological characterization of anaerobic cometabolic transformation of sulfamethoxazole by Nitratidesulfovibrio vulgaris Hildenborough
Source: Appl Microbiol Biotechnol. 2026 Mar 31;110(1):129. doi: 10.1007/s00253-026-13792-3 (PMC13043603; doi:10.1007/s00253-026-13792-3)
Supplement: Supplementary file 1 — (XLSX 494 KB) [file 253_2026_13792_MOESM1_ESM.xlsx]

## Sheet: Table caption
Supplementary Table S5. Protein expression in cell extract of Nitratidesulfovibrio vulgaris Hildenborough cultivated with 1) lactate, sulfate and 0.1 mM sulfamethoxazole ("SMX-Sul-H2-Lac"), 2) hydrogen, acetate and sulfate either with 0.1 mM SMX (SMX-Sul-H2-Ac) or 3) without 0.1 mM SMX but hydrogen, acetate and sulfate (NSC). Annotation is based on NCBI accession number GCA_000195755.1. Comparati…

## Sheet: Table S5
Accesion number	Locus tag (dvu)	ANNOTATION	Sum PEP Score	Coverage [%]	# Peptides	# PSMs	# Unique Peptides	# AAs	MW [kDa]	calc. pI	Score Sequest HT: Sequest HT	# Peptides (by Search Engine): Sequest HT	# Razor Peptides	Abundance Ratio: (smx_h2) / (nsc)	Abundance Ratio: (smx_lac) / (nsc)	Abundance Ratio: (smx_lac) / (smx_h2)	Abundance Ratio Adj. P-Value: (smx_h2) / (nsc)	Abundance Ratio Adj. P-Value: (smx_lac) / (nsc)	Abundance Ratio Adj. P-Value: (smx_lac) / (smx_h2)	Abundance Ratio Variability [%]: (smx_h2) / (nsc)	Abundance Ratio Variability [%]: (smx_lac) / (nsc)	Abundance Ratio Variability [%]: (smx_lac) / (smx_h2)	Abundances (Grouped): nsc	Abundances (Grouped): smx_h2	Abundances (Grouped): smx_lac	Abundances (Grouped) CV [%]: nsc	Abundances (Grouped) CV [%]: smx_h2	Abundances (Grouped) CV [%]: smx_lac	Found in Sample: [S1] F1: Sample, nsc	Found in Sample: [S2] F2: Sample, nsc	Found in Sample: [S3] F3: Sample, nsc	Found in Sample: [S4] F4: Sample, smx_h2	Found in Sample: [S5] F5: Sample, smx_h2	Found in Sample: [S6] F6: Sample, smx_h2	Found in Sample: [S7] F7: Sample, smx_lac	Found in Sample: [S8] F8: Sample, smx_lac	Found in Sample: [S9] F9: Sample, smx_lac
AAS96248.1	1771	[Fe] hydrogenase gamma	31.358	19	8	26	8	606	66	6.96	16.74	8	0	0.849	0.648	0.799	0.874109	0.819244	0.950814	84.86	84.82	46.81	2.04293e+06	1.62196e+06	1.2061e+06	17.26	2.04	18.05	High	High	High	High	High	High	High	High	High
AAS96165.1	1688	1-acyl-sn-glycerol-3-phosphate acyltransferase, putative	22.281	25	6	19	6	269	29.5	8.44	19.59	6	0	1.271	0.624	0.549	0.679131	0.722096	0.621209	42.29	48.33	42.59	3.00708e+06	2.90226e+06	1.79658e+06	8.13	26.83	38.07	High	High	High	High	High	High	High	High	High
AAS95346.1	866	1-deoxy-D-xylulose 5-phosphate reductoisomerase	14.472	12	4	19	4	408	43.6	6.48	12.31	4	0	1.211	0.875	1.091	0.882562	0.975395	0.997949	78.47	67.48	39.41	1.10957e+06	892958	750459	21.53	32.22	46.85	High	High	High	High	High	High	High	High	High
AAS95828.1	1350	1-deoxy-D-xylulose-5-phosphate synthase	53.095	21	11	33	11	641	69.1	6.54	31.43	11	0	1.247	1.355	0.822	0.787301	0.937226	0.938496	49.27	68.13	69.33	2.02193e+06	2.52975e+06	2.19732e+06	20.3	3.67	13.85	High	High	High	High	High	High	High	High	High
AAS95822.1	1344	1-hydroxy-2-methyl-2-(E)-butenyl 4-diphosphate synthase	109.978	56	17	93	17	386	41.7	6.28	158.62	17	0	0.916	0.875	0.907	0.953718	0.953611	0.962957	59.43	62.54	72.63	1.30027e+07	1.29495e+07	1.00977e+07	15.9	15.07	4.14	High	High	High	High	High	High	High	High	High
AAS95404.1	924	23S rRNA (uracil-5-)-methyltransferase RumA	19.569	12	4	21	4	468	51.2	6.27	12.62	4	0	0.979	0.745	0.713	0.984949	0.921572	0.896116	38.73	42.91	24.08	1.03961e+06	1.17036e+06	996987	33.4	3.02	14.44	High	High	High	High	High	Not Found	High	High	High
AAS95932.1	1454	2-C-methyl-D-erythritol 4-phosphate cytidylyltransferase	26.094	20	6	16	6	395	41.7	6.37	15.28	6	0	0.741	1.427	1.872	0.766435	0.93275	0.744593	68.59	64.83	58.89	1.21251e+06	825791	1.14033e+06	23.55	20.07	18.89	Peak Found	High	Not Found	High	High	High	High	High	High
AAS97012.1	2540	2-hydroxyglutaryl-CoA dehydratase, D-component	20.588	15	5	16	5	380	41.9	5.44	13.34	5	0	0.846	2	1.828	0.929563	0.707245	0.763948	89.92	64.78	52.68	675774	242641	1.57104e+06	19.17	6.96	26.56	High	High	Peak Found	Peak Found	High	Not Found	High	High	High
AAS97452.1	2981	2-isopropylmalate synthase	146.648	47	25	172	25	509	55.3	6.23	239.06	25	0	0.62	0.644	0.928	0.11625	0.706387	0.972027	71.99	59.59	72.7	2.59212e+07	1.97761e+07	1.68906e+07	15.94	1.78	26.59	High	High	High	High	High	High	High	High	High
AAS96390.1	1914	2-isopropylmalate synthase/homocitrate synthase family protein	112.091	37	19	148	19	538	59.1	6.87	188.02	19	0	1.119	1.099	0.973	0.819845	0.993965	0.98323	37.87	42.65	43.69	1.9877e+07	2.08406e+07	2.16756e+07	14.87	22.37	11.84	High	High	High	High	High	High	High	High	High
AAS95901.1	1423	2-oxoglutarate dehydrogenase, E3 component, lipoamide dehydrogenase	45.686	26	9	29	9	456	47.2	6.32	32.89	9	0	0.93	0.911	0.817	0.953718	0.966741	0.896116	53.24	33.57	60.27	3.23901e+06	5.46246e+06	2.57334e+06	24.72	14.28	18.72	High	High	High	High	High	Peak Found	High	High	High
AAS95562.1	1082	3'- 5' exonuclease domain protein	11.742	20	3	7	3	202	22.6	6.09	1.62	3	0	0.85	1.844	1.439	0.927	0.82653	0.945517	59.69	68.06	36.16	341945	309907	402120	50.67	28.56	5.85	High	High	Peak Found	High	Peak Found	Peak Found	High	Peak Found	High
AAS95677.1	1199	3,4-dihydroxy-2-butanone 4-phosphate synthase/GTP cyclohydrolase II	120.668	50	17	120	17	409	44.8	6.1	215	17	0	0.676	1.268	1.656	0.270112	0.964364	0.833374	66.48	59.94	78.04	1.41571e+07	1.05765e+07	1.55375e+07	13.95	9.85	0.59	High	High	High	High	High	High	High	High	High
AAS96102.1	1624	3-deoxy-8-phosphooctulonate synthase	32.369	27	6	20	6	273	29.3	6.54	21.71	6	0	0.729	1.432	1.882	0.7061	0.915515	0.730157	52.06	47.8	43.24	1.63936e+06	1.30226e+06	2.75827e+06	37.69	8.99	26.95	High	High	High	High	High	Not Found	High	High	High
AAS94824.1	341	3-deoxy-D-manno-octulosonate cytidylyltransferase	39.855	44	9	28	9	256	28.9	5.25	40.11	9	0	0.616	2.119	3.047	0.317103	0.473013	0.200942	60.93	54.75	41.1	2.52744e+06	1.25399e+06	5.9145e+06	41.41	39.4	18.01	High	High	High	High	High	High	High	High	High
AAS94818.1	335	3-deoxy-D-manno-octulosonic-acid transferase, putative	19.115	11	4	26	4	530	56	6.27	14.42	4	0	1.069	2.123	1.982	0.938474	0.53975	0.710958	46.54	109.62	50.79	7.3348e+06	1.7789e+06	7.75799e+06	82.68	130.43	20.64	High	High	Peak Found	High	High	Peak Found	High	High	High
AAS97453.1	2982	3-isopropylmalate dehydratase, large subunit	91.024	39	13	115	13	419	43.8	5.72	187.68	13	0	0.63	0.865	1.106	0.137732	0.949871	0.999667	68.74	63.71	47.06	1.94041e+07	1.47299e+07	1.68367e+07	12.51	39.11	16.78	High	High	High	High	High	High	High	High	High
AAS97454.1	2983	3-isopropylmalate dehydratase, small subunit	36.579	41	5	34	5	167	17.8	5.54	50.5	5	0	0.883	0.97	1.019	0.91271	0.993965	0.984176	81.72	56.28	68.63	4.34575e+06	5.06851e+06	4.06046e+06	40.9	27.78	1.39	High	High	High	High	High	High	High	High	High
AAS97456.1	2985	3-isopropylmalate dehydrogenase	110.105	56	18	115	18	357	37.7	5.2	177.58	18	0	0.582	0.436	0.641	0.0483462	0.20875	0.717654	57.58	61.01	75.55	2.66351e+07	1.93401e+07	9.71496e+06	10.64	13.12	17.92	High	High	High	High	High	High	High	High	High
AAS96918.1	2446	3-methyl-2-oxobutanoate hydroxymethyltransferase	36.211	22	6	24	6	307	32.6	6.44	47.98	6	0	1.344	1.482	0.85	0.550471	0.895298	0.941798	43.56	48.75	54.21	3.26578e+06	3.09692e+06	3.20487e+06	12.43	23.62	12.67	High	High	High	High	High	High	High	High	High
AAS96793.1	2320	3-octaprenyl-4-hydroxybenzoate carboxy-lyase family protein	115.529	36	21	115	21	612	68.2	7.05	126.82	21	0	0.912	1.279	1.494	0.951128	0.964364	0.905221	45.51	49.02	48.59	1.05317e+07	9.17396e+06	2.36333e+07	45.97	42.53	14.5	High	High	High	High	High	High	High	High	High
AAS95684.1	1206	3-oxoacyl-(acyl-carrier-protein) reductase	59.03	52	9	51	9	247	25.9	6.73	63.42	9	0	0.998	1.993	2.653	0.99509	0.578779	0.320953	66.5	84.45	78.28	4.29065e+06	4.09517e+06	8.3442e+06	14.72	28.57	20.21	High	High	High	High	High	High	High	High	High
AAS95682.1	1204	3-oxoacyl-(acyl-carrier-protein) synthase II	45.952	33	8	40	8	415	43.9	5.85	55.59	8	0	0.57	1.814	2.28	0.105422	0.68792	0.495158	68.45	68.22	61.15	3.15942e+06	2.27351e+06	5.62257e+06	32.33	12.41	28.26	High	High	High	High	High	High	High	High	High
AAS95685.1	1207	3-oxoacyl-(acyl-carrier-protein) synthase III	30.199	23	5	19	5	330	34.6	5.17	24.75	5	0	0.676	2.699	3.128	0.681677	0.346982	0.218254	61.53	76.81	53.46	645601	342103	1.88135e+06	10.82	8.29	21.12	High	High	Peak Found	High	Peak Found	Peak Found	High	High	High
AAS94946.1	463	3-phosphoshikimate 1-carboxyvinyltransferase	62.966	31	11	75	11	439	46.2	6.28	120.35	11	0	0.988	0.624	0.599	0.971674	0.681006	0.64268	48.06	44.79	41.02	8.92407e+06	1.10772e+07	6.76298e+06	20.99	6.97	15.16	High	High	High	High	High	High	High	High	High
AAS97618.1	3148	4-alpha-glucanotransferase	28.238	19	6	16	6	503	55.9	6.04	6.86	6	0	0.945	1.063	0.89	0.96948	0.993965	0.984176	123.08	79.81	99.49	563628	1.27391e+06	1.14234e+06	30.47	30.48	9.52	High	High	Peak Found	High	Peak Found	Not Found	High	High	High
AAS95453.1	973	4-hydroxybenzoate octaprenyltransferase, putative	5.96	6	2	10	2	289	31.7	9	10.53	2	0	0.795	0.626	0.637	0.832428	0.802676	0.837839	71.58	61.62	35.16	1.44822e+06	1.10398e+06	843890	80.14	45.9	21.42	High	High	High	High	High	Peak Found	High	High	High
AAS95477.1	997	5,10-methylenetetrahydrofolate reductase	82.227	51	15	97	15	291	32	5.69	155.37	15	0	0.814	1.584	1.805	0.775925	0.832165	0.763377	64.95	44.53	59.45	7.81019e+06	7.70691e+06	1.12948e+07	5.11	13.21	35.45	High	High	High	High	High	High	High	High	High
AAS97617.1	3147	6-phosphofructo-2-kinase/fructose-2,6-biphosphatase	37.509	30	9	24	9	420	47.9	8.87	12.34	9	0	0.711	1.016	1.601	0.616511	0.993965	0.874432	66.2	34.95	78.01	1.84781e+06	2.2358e+06	6.65636e+06	77.63	28.1	5.95	High	High	High	Peak Found	High	Peak Found	High	High	High
AAS96534.1	2061	6-phosphofructokinase	106.308	46	15	139	15	444	48.1	6.54	162	15	0	1.088	0.885	0.779	0.866809	0.956732	0.870807	66.64	58.88	68.91	1.96698e+07	2.3666e+07	1.71301e+07	7.85	24.74	3.38	High	High	High	High	High	High	High	High	High
AAS96786.1	2313	6-phosphogluconolactonase	79.098	48	12	79	12	249	27.7	6.44	120.87	12	0	1.51	1.858	1.114	0.108741	0.664095	0.999667	61.25	76.23	42.14	9.03454e+06	1.10808e+07	1.32316e+07	27.61	22.08	27.04	High	High	High	High	High	High	High	High	High
AAS97129.1	2657	6-pyruvoyl tetrahydrobiopterin synthase, putative	6.762	17	2	8	2	120	13.3	6.4	0	2	0	1.518	1.108	0.664	0.652892	0.993965	0.869763	41.36	39.96	47.25	607915	823450	468457	43.66	61.49	43.65	Peak Found	High	High	High	Peak Found	High	High	Peak Found	High
AAS95830.1	1352	6-pyruvoyl tetrahydrobiopterin synthase, putative	8.904	16	2	6	2	129	14.4	6.32	8.35	2	0	3.213	2.96	1.53	0.0613512	0.396075	0.896116	121.27	82.11	87.45	303610	331509	818195	1.92	84.98	29.49	Peak Found	Peak Found	High	Peak Found	Peak Found	High	High	Peak Found	High
AAS96860.1	2387	ABC transporter, ATP-binding protein	19.326	17	6	10	6	592	62.8	8.34	4.51	6	0	1.18	0.27	0.172	0.898766	0.0796941	0.0148813	67.74	74.83	26.99	2.13336e+06	1.10398e+06	303833	11.5	10.88	30.08	High	High	High	High	High	High	Peak Found	High	Peak Found
AAS95529.1	1049	ABC transporter, ATP-binding protein	11.955	18	3	19	3	216	23.4	8.18	13.7	3	0	1.26	0.67	0.395	0.823302	0.865329	0.347717	75.01	37.08	70.21	1.51812e+06	1.91572e+06	1.00973e+06	34.82	28.75	12.83	High	High	High	High	High	High	High	High	High
AAS96963.1	2491	ABC transporter, ATP-binding protein	26.56	12	5	19	5	632	67	6.52	20.1	5	0	0.879	0.622	0.607	0.918347	0.793085	0.792145	36.57	29.64	28.6	1.96247e+06	1.75118e+06	987957	15	8	4.12	High	High	High	High	High	High	High	High	High
AAS96455.1	1979	ABC transporter, ATP-binding protein	32.441	14	7	21	7	641	72	5.62	26.61	7	0	1.14	0.68	0.63	0.935944	0.866559	0.821751	36.97	33	30.21	1.46404e+06	1.30639e+06	857498	14.46	10.63	4.66	High	High	High	High	High	Peak Found	High	High	High
AAS97058.1	2586	ABC transporter, ATP-binding protein	199.24	56	28	263	28	560	62.6	5.71	373.83	28	0	0.944	0.731	0.791	0.971674	0.830619	0.882493	53.55	51.63	47.56	4.62163e+07	4.02902e+07	2.94435e+07	8.42	93.15	4.46	High	High	High	High	High	High	High	High	High
AAS97631.1	3161	ABC transporter, ATP-binding protein	59.31	28	8	64	8	349	37.9	6.86	91.87	8	0	0.859	1.366	1.425	0.870738	0.937226	0.937432	55.28	63.49	73.42	9.16178e+06	9.06362e+06	1.19345e+07	17.15	32.86	16.69	High	High	High	High	High	High	High	High	High
AAS94379.1	A0076	ABC transporter, ATP-binding protein	33.684	20	7	32	7	464	50.6	5.54	30.61	7	0	1.135	1.282	1.317	0.896373	0.964364	0.964272	48.32	48.04	39.38	2.82842e+06	2.6238e+06	2.95254e+06	27.92	13.37	2.88	High	High	High	High	High	Peak Found	High	High	High
AAS95723.1	1245	ABC transporter, ATP-binding protein	36.429	30	7	24	7	274	29.8	7.65	38.04	7	0	1.067	1.649	1.24	0.959946	0.819244	0.98323	43.17	47.61	51.92	1.98549e+06	1.89136e+06	3.5537e+06	9.18	40.62	9.47	High	High	High	High	High	High	High	High	High
AAS96105.1	1627	ABC transporter, ATP-binding protein	47.702	34	7	45	7	241	26.6	7.17	41.63	7	0	1.321	1.504	1.127	0.702161	0.895298	0.997949	46.95	66.24	69.25	2.24431e+06	2.058e+06	2.9019e+06	1.19	15.24	10.69	High	High	High	High	High	Peak Found	High	High	High
AAS96148.1	1671	ABC transporter, ATP-binding protein/permease protein	42.752	18	9	28	9	601	66.4	6.25	32.14	9	0	1.128	1.174	0.947	0.858104	0.993965	0.972027	42.2	43.67	40.15	4.5935e+06	5.04001e+06	5.7494e+06	10.7	26.11	2.8	High	High	High	High	High	High	High	High	High
AAS95497.1	1017	ABC transporter, ATP-binding protein/permease protein	69.127	19	12	55	12	776	83.6	7.99	70.63	12	0	0.964	0.981	1.245	0.971674	0.993965	0.984176	73.48	57.23	49.5	4.27565e+06	3.77429e+06	4.33726e+06	5.63	21.81	4.73	High	High	High	High	High	High	High	High	High
AAS97632.1	3162	ABC transporter, periplasmic substrate-binding protein	147.526	54	19	127	19	431	47.1	8.6	222.54	19	0	1.15	3.704	3.202	0.756999	0.0365864	0.146332	103.52	67.91	65.87	1.04264e+07	1.21395e+07	3.07307e+07	10.42	18.33	4.63	High	High	High	High	High	High	High	High	High
AAS94427.1	A0023	ABC transporter, permease protein, putative	11.036	10	3	5	3	376	40.5	6.7	2.35	3	0	1.894	1.443	0.862	0.416274	0.95245	0.982149	75.65	54.68	29	386732	713653	580425	18.47	11.92	7.12	High	Peak Found	Not Found	High	Peak Found	High	High	Peak Found	High
AAS97501.1	3030	acetate kinase	103.739	54	19	82	19	402	44.1	5.86	104.12	19	0	1.052	1.415	1.483	0.925408	0.91853	0.910428	59.36	55.39	71.3	1.13688e+07	1.17365e+07	1.40376e+07	8.11	9.27	28.82	High	High	High	High	High	High	High	High	High
AAS97440.1	2969	acetoacetyl-CoA synthase	95.575	35	20	86	20	661	73.5	5.99	99.4	20	0	0.865	0.472	0.461	0.882562	0.290872	0.31726	63.41	81.7	89.68	1.32564e+07	1.48897e+07	5.6539e+06	12.87	20.45	59.08	High	High	High	High	High	High	High	High	High
AAS94843.1	360	acetolactate synthase, large subunit, biosynthetic type	27.297	8	3	17	3	563	59.7	6.21	15.66	3	0	0.864	0.134	0.156	0.900092	0.001099	0.00392919	34.19	48.17	39.98	2.3548e+06	2.1944e+06	147894	3.76	40.3	27.22	High	High	High	High	High	High	High	High	High
AAS95854.1	1376	acetolactate synthase, large subunit, biosynthetic type	101.796	38	20	119	20	563	61.6	5.77	184.43	20	0	0.988	0.734	0.83	0.971674	0.833416	0.91123	69.08	66.4	75.28	2.19509e+07	1.90979e+07	1.69154e+07	23.33	14.18	55.09	High	High	High	High	Peak Found	Peak Found	High	High	High
AAS95855.1	1377	acetolactate synthase, small subunit	50.877	59	9	64	9	162	17.9	8.16	116.63	9	0	1.078	0.563	0.548	0.881371	0.51808	0.518643	50.54	53.18	68.16	1.41808e+07	1.70246e+07	8.05224e+06	27.79	30.13	14.02	High	Peak Found	Peak Found	High	Peak Found	Peak Found	High	High	High
AAS95107.1	626	acetolactate synthase, small subunit	40.339	59	8	28	8	159	17.5	5.21	33.87	8	0	1.643	1.168	0.824	0.139795	0.993965	0.905221	93.05	75.51	80.98	2.69529e+06	3.34782e+06	4.18794e+06	27.51	16.96	37.72	High	High	High	High	High	High	High	High	Not Found
AAS96699.1	2226	acetyl-CoA carboxylase, biotin carboxylase, putative	75.216	40	17	82	17	471	53.3	6.04	58.15	17	0	0.833	0.985	1.281	0.823299	0.993965	0.979103	91.73	67.27	82.22	7.06437e+06	7.61735e+06	6.95572e+06	35.75	51.87	23.19	High	High	High	High	High	High	High	High	High
AAS96698.1	2225	acetyl-CoA carboxylase, carboxyl transferase, alpha/beta subunit	126.605	34	23	171	23	751	84.5	8.6	251.52	23	0	0.665	0.997	1.303	0.229099	0.993965	0.974669	53.39	55.25	58.26	2.70907e+07	2.18352e+07	2.34985e+07	4.33	11.37	6.17	High	High	High	High	High	High	High	High	High
AAS95228.1	748	acetyl-CoA synthetase	21.348	10	4	12	4	648	72	6.3	10.75	4	0	0.907	0.481	0.449	0.95033	0.568207	0.54986	43.76	96.58	34.18	933079	803736	641732	16.46	25.48	24.41	High	High	High	High	High	High	High	High	Peak Found
AAS95944.1	1466	acetylglutamate kinase	116.361	66	18	145	18	308	33.1	6.18	220.84	18	0	1.037	1.154	1.174	0.938474	0.993965	0.997848	74.97	56.85	67.27	2.40696e+07	3.44207e+07	2.71206e+07	27.16	5.94	21.17	High	High	High	High	High	High	High	High	High
AAS96820.1	2347	acetylornithine aminotransferase	44.511	26	9	37	9	399	43.5	6.39	60.43	9	0	1.332	2.01	1.776	0.55637	0.544171	0.80279	61.02	65.52	27.2	3.58535e+06	3.44148e+06	6.39796e+06	8.38	4.16	3.1	High	High	High	High	High	Not Found	High	High	High
AAS96304.1	1827	acetylornithine deacetylase/succinyl-diaminopimelate desuccinylase family protein	31.568	33	8	25	8	407	43.8	4.92	15.1	8	0	1.503	3.298	1.59	0.575863	0.156511	0.850842	71.52	88.46	61.86	864559	1.61323e+06	2.38882e+06	8.57	26.06	14.36	Peak Found	High	High	High	High	Not Found	High	High	High
AAS94823.1	340	acetyltransferase, CysE/LacA/LpxA/NodL family	23.679	20	3	24	3	197	21	8.53	41.58	3	0	1.095	1.072	1.007	0.953718	0.993965	0.999667	35.22	43.92	21.01	1.71105e+06	1.68922e+06	1.78638e+06	38.57	25.44	15.22	High	High	High	High	High	High	High	High	High
AAS97441.1	2970	acetyltransferase, GNAT family	85.562	26	18	62	18	898	97.3	5.97	53.97	18	0	1.117	0.639	0.48	0.879145	0.722096	0.340112	47.31	64.94	62.45	5.18105e+06	5.84739e+06	3.20503e+06	5.48	8.66	16.06	High	High	High	High	High	High	High	High	High
AAS96065.1	1587	acetyltransferase, GNAT family	11.556	16	3	16	3	154	17.3	5.33	16.02	3	0	0.825	0.685	0.715	0.872807	0.881856	0.905221	33.93	50.51	56.98	1.16861e+06	1.07742e+06	906384	16.29	0.64	25.93	High	High	High	High	High	High	High	High	High
AAS96615.1	2142	acid phosphatase SurE	28.479	22	4	20	4	250	27.1	6.16	25.2	4	0	0.773	0.819	0.913	0.695852	0.93275	0.980264	34.62	47.63	48.04	2.89486e+06	2.52759e+06	1.99655e+06	28.38	10.33	21.79	High	High	High	High	High	Not Found	High	High	High
AAS95544.1	1064	aconitate hydratase, putative	177.822	47	21	178	21	642	67.5	5.96	288.18	21	0	0.964	1.78	1.458	0.999866	0.718486	0.921499	64.4	61.23	58.38	1.64413e+07	1.65006e+07	2.8149e+07	10.13	4.13	17.1	High	High	High	High	High	High	High	High	High
AAS97718.1	3248	AcrB/AcrD/AcrF family protein	36.228	9	7	24	7	1047	112.5	6.42	19.49	7	0	1.226	1.602	1.537	0.866809	0.842031	0.863088	37.45	40.45	45.85	1.34198e+06	1.36202e+06	2.21601e+06	11.63	10.79	22.19	High	High	Peak Found	High	High	Peak Found	High	High	High
AAS94543.1	59	AcrB/AcrD/AcrF family protein	36.677	10	9	28	9	1236	133.9	6.7	2.31	9	0	1.002	0.952	0.941	0.998031	0.993965	0.997848	46.55	39.92	42.34	1.50801e+06	1.43711e+06	1.11814e+06	10.04	55.44	23.06	High	High	High	High	High	Peak Found	High	High	High
AAS96090.1	1612	ACT domain protein	34.214	30	4	22	4	143	15.4	5.85	47.07	4	0	1.934	2.892	2.166	0.0188801	0.125286	0.581368	44.69	76.97	94.87	2.58682e+06	4.07653e+06	7.83029e+06	38.7	7.3	42.97	Peak Found	High	High	High	High	High	High	High	High
AAS97020.1	2548	acyl carrier protein phosphodiesterase	85.517	49	8	57	8	209	23	5.64	85.74	8	0	0.966	3.244	3.034	0.971674	0.0876211	0.18773	73.38	81.48	65.11	3.77633e+06	3.64485e+06	9.15212e+06	58.83	17.15	6.97	High	High	High	High	High	High	High	High	High
AAS96840.1	2367	acyl-(acyl-carrier-protein)--UDP-N-acetylglucosamine O-acyltransferase	20.476	20	6	22	6	267	28.8	6.52	11.87	6	0	1.199	0.692	0.56	0.803295	0.830619	0.666745	62.66	40.48	75.64	2.79866e+06	2.73826e+06	1.85673e+06	23.12	23.42	11.51	High	High	High	High	Peak Found	High	High	High	High
AAS96150.1	1673	acyltransferase, putative	16.504	16	5	11	5	314	35.3	10.37	8.82	5	0	1.208	1.008	0.762	0.896373	0.993965	0.943933	27.08	41.37	39.39	835327	992134	905645	5.33	8.47	12.39	High	High	Peak Found	High	High	Peak Found	Peak Found	High	High
AAS94924.1	441	adenine deaminase	104.591	35	17	105	17	575	60.7	5.55	106.66	17	0	0.976	1.171	1.232	0.987503	0.993965	0.984176	60.44	43.56	68.05	1.18298e+07	1.30824e+07	1.22057e+07	13.01	29.1	21.23	High	High	High	High	High	High	High	High	High
AAS96648.1	2175	adenine specific DNA methyltransferase, putative	139.049	21	28	89	28	1595	179.4	6.4	106.74	28	0	1.01	0.999	1.08	0.957487	0.993965	0.998377	47.53	51.91	50.1	9.70685e+06	7.48433e+06	9.78995e+06	5.4	7.46	7.69	High	High	High	High	High	High	High	High	High
AAS95088.1	607	adenosylhomocysteinase	164.205	44	29	324	29	479	52.9	5.67	504.89	29	0	0.955	1.457	1.426	0.988116	0.901395	0.9359	55.69	58.76	55.27	9.69109e+07	9.43607e+07	1.22944e+08	8.91	10.01	11.87	High	High	High	High	High	High	High	High	High
AAS96078.1	1600	adenylate cyclase	11.398	16	3	9	3	203	22.6	5.5	3.43	3	0	2.707	0.405	0.405	0.0236135	0.428508	0.456862	66.63	59.06	39.96	538293	1.1502e+06	230973	43.16	17.69	34.36	High	High	High	High	High	Not Found	High	High	High
AAS96408.1	1932	adenylate kinase	105.342	60	13	120	13	223	24.4	6.57	167.4	13	0	1.377	1.73	1.137	0.270112	0.740049	0.998377	66.14	76.22	59.33	1.036e+07	1.55849e+07	2.38032e+07	18.26	13.65	29.07	High	High	High	High	High	High	High	High	High
AAS97414.1	2942	adenylosuccinate lyase	82.649	38	15	96	15	430	48.5	6.58	125.47	15	0	0.864	1.059	1.166	0.882088	0.993965	0.997949	68.04	61.63	56.8	1.32114e+07	1.32815e+07	1.29689e+07	39.61	27.9	22.45	High	High	High	High	High	High	High	High	High
AAS97674.1	3204	adenylosuccinate synthetase	125.006	46	20	137	20	426	46.3	6.29	256.41	20	0	0.629	1.336	1.927	0.135839	0.950679	0.712365	42.64	59.88	56.57	2.86258e+07	1.49607e+07	2.63549e+07	22.77	29.58	12.37	High	High	High	High	High	High	High	High	High
AAS94378.1	A0079	adenylylsulfate kinase	16.795	30	5	12	5	228	25.5	6.67	8.94	5	0	0.931	1.174	1.106	0.966597	0.993965	0.997848	54.75	47.6	49.95	726504	751735	906708	49.66	10.29	14.93	High	High	Peak Found	High	Peak Found	Peak Found	High	High	High
AAS95327.1	847	adenylyl-sulphate reductase, alpha subunit	548.434	66	53	3146	53	664	74.6	6.96	6730.93	53	0	0.819	1.112	1.402	0.784292	0.993965	0.946251	69.44	68.26	64.47	1.79561e+09	1.6253e+09	1.71102e+09	12.28	11.07	18.15	High	High	High	High	High	High	High	High	High
AAS95326.1	846	adenylylsulphate reductase, beta subunit	158.635	81	8	526	8	167	18.5	4.98	831.47	8	0	0.464	2.177	4.983	0.000681611	0.448986	0.0125124	105.58	71.3	104.77	7.36745e+07	7.2608e+07	1.31512e+08	46.26	62.28	34.95	High	High	High	High	High	High	High	High	High
AAS97830.1	3361	ADP-heptose synthase, putative	37.427	27	7	28	7	341	36.2	6.18	29.89	7	0	1.374	0.778	0.45	0.555597	0.930904	0.403588	56.68	57.72	44.76	2.12291e+06	2.92661e+06	1.51461e+06	15.53	15.08	13.38	High	High	High	High	High	High	High	High	High
AAS94964.1	481	ADP-L-glycero-D-mannoheptose-6-epimerase	52.765	47	11	36	11	323	36.7	5.27	44.83	11	0	0.998	1.338	1.312	0.993699	0.94918	0.976855	38.54	56.93	51.62	5.03638e+06	3.73441e+06	5.17614e+06	13.64	16.6	29.39	High	High	High	High	High	High	High	High	High
AAS97751.1	3282	ADP-ribosylglycohydrolase family protein	48.161	36	7	26	7	299	32.3	6.32	55.6	7	0	1.35	2.903	1.875	0.7002	0.167637	0.737876	74.04	28.83	40.05	1.45526e+06	2.07823e+06	5.00322e+06	14.66	9.07	14.72	High	High	High	High	High	Peak Found	High	High	High
AAS97548.1	3077	AhpC/TSA family protein	10.3	15	3	26	3	253	26.9	8.65	0	3	0	0.63	0.776	1.783	0.137545	0.885862	0.768162	70.88	31.92	40.54	1.25117e+07	1.13947e+07	9.17056e+06	23.97	48.35	23.15	High	High	High	High	High	High	High	High	High
AAS94766.1	283	AhpF family protein/thioredoxin reductase	184.483	55	28	232	28	661	71.3	8.28	315.08	28	0	1.076	0.967	0.958	0.883023	0.992001	0.980209	62.36	73.16	68.41	3.49632e+07	3.53199e+07	2.6153e+07	12.58	16.76	39.98	High	High	High	High	High	High	High	High	High
AAS95052.1	571	alanine dehydrogenase	139.173	47	13	428	13	370	38.7	6.23	531.88	13	0	0.775	0.407	0.389	0.640083	0.156511	0.157423	50.26	68.18	79.76	7.31878e+07	7.02789e+07	3.00001e+07	15.14	7.72	26.55	High	High	High	High	High	High	High	High	High
AAS95435.1	955	alanine racemase	27.636	20	5	16	5	376	39.4	7.88	19.08	5	0	0.688	1.038	1.314	0.699671	0.996521	0.955641	35.47	47.14	56.42	1.06535e+06	508319	1.13942e+06	3.95	41.23	16.87	High	High	Peak Found	Peak Found	High	Peak Found	High	High	High
AAS95569.1	1089	alanyl-tRNA synthetase	176.839	40	31	189	31	879	96.9	5.81	213.82	31	0	0.813	1.339	1.611	0.766435	0.950366	0.850842	50.42	47.51	58.82	2.19283e+07	1.79444e+07	2.40654e+07	13.77	5.96	14.37	High	High	High	High	High	High	High	High	High
AAS97017.1	2545	alcohol dehydrogenase, iron-containing	24.192	16	4	32	4	386	40	5.31	37.24	4	0	1.333	0.486	0.404	0.49035	0.395072	0.194683	29.55	55.41	69.6	4.54365e+06	5.26095e+06	2.00912e+06	2.14	32.65	23.93	High	High	High	High	High	High	High	High	High
AAS94836.1	353	alcohol dehydrogenase, iron-containing	74.498	36	14	104	14	357	39.4	5.64	179.64	14	0	1.049	0.822	0.692	0.927	0.921572	0.772681	60.4	53.28	76.11	2.7396e+07	3.0328e+07	2.31226e+07	12.09	36.93	12.07	High	High	High	High	High	High	High	High	High
AAS96869.1	2396	alcohol dehydrogenase, iron-containing	29.501	16	5	16	5	380	41	6.02	15.99	5	0	1.353	0.545	0.612	0.725136	0.68166	0.796345	30.26	42.31	99.99	1.40966e+06	1.76828e+06	774514	20.12	11.66	27.57	High	High	High	High	High	High	Peak Found	High	High
AAS97357.1	2885	alcohol dehydrogenase, iron-containing	22.333	14	5	22	4	397	42	6.23	26.77	5	0	1.106	2.043	1.468	0.947065	0.573865	0.905221	55.4	117.3	65.49	1.14468e+06	1.45773e+06	3.01838e+06	25.24	19.16	26.14	High	High	High	High	High	High	High	High	High
AAS96878.1	2405	alcohol dehydrogenase, iron-containing	131.445	47	17	120	17	393	41.7	7.18	182.1	17	0	1.405	2.201	1.301	0.222	0.434524	0.974669	42.22	83.11	90.17	8.03482e+06	1.10621e+07	1.55959e+07	27.03	23.86	106.08	High	High	High	High	High	High	High	High	High
AAS96674.1	2201	alcohol dehydrogenase, iron-containing	88.235	44	15	87	15	385	41.9	5.96	157.81	15	0	1.036	1.008	1.018	0.939208	0.993965	0.991103	46.92	69.75	70.44	1.18713e+07	1.09771e+07	9.05237e+06	15.27	9.67	20.73	High	High	High	High	High	High	High	High	High
AAS97763.1	3294	aldehyde dehydrogenase (NADP) family protein	87.085	47	19	119	19	464	49.3	6.73	145.44	19	0	0.94	0.789	0.795	0.971674	0.897678	0.888483	60.85	56.48	52.62	1.09132e+07	1.09402e+07	9.70203e+06	19.97	10.76	10.42	High	High	High	High	High	High	High	High	High
AAS96037.1	1559	aldehyde oxidoreductase	14.555	5	3	9	3	906	97.4	6.16	5.83	3	0	1.405	0.38	0.264	0.721858	0.420741	0.111671	35.04	45.47	41.08	694580	1.04062e+06	262100	21	20.34	12.15	High	High	High	High	High	High	Peak Found	High	Peak Found
AAS95657.1	1179	aldehyde:ferredoxin oxidoreductase, tungsten-containing	329.954	50	29	714	29	576	60.9	5.54	1481.3	29	0	0.748	1.4	1.699	0.549581	0.924507	0.812714	66.64	58.37	60.02	1.70328e+08	1.41938e+08	1.94188e+08	22.37	14.85	8.91	High	High	High	High	High	High	High	High	High
AAS95168.1	687	aldehyde:ferredoxin oxidoreductase, tungsten-containing, putative	78.162	29	15	48	15	594	65.1	6.98	80.29	15	0	1.363	2.508	1.789	0.366916	0.238725	0.764811	58.57	66.75	83.57	3.67148e+06	1.02569e+07	7.12567e+06	12.51	5.91	21.48	High	High	High	High	High	High	High	High	High
AAS96302.1	1825	amidohydrolase family protein	55.097	25	7	25	7	442	47.3	5.67	48.61	7	0	0.802	1.445	1.346	0.814027	0.91853	0.950814	22.07	43.91	50.46	2.00364e+06	1.54065e+06	2.86119e+06	13.03	13.36	30.39	High	High	High	High	High	High	High	High	High
AAS94645.1	161	amidophosphoribosyltransferase	57.697	30	11	46	11	462	51.7	7.49	82.35	11	0	0.882	1.589	1.48	0.900859	0.844846	0.910685	57.25	57.79	72.82	5.27889e+06	4.95971e+06	7.55323e+06	16.83	22.97	14.53	High	High	High	High	High	High	High	High	High
AAS94778.1	295	amine oxidase, flavin-containing	38.1	17	6	24	6	449	50.9	5.97	45.34	6	0	0.814	1.224	1.193	0.781025	0.986041	0.985375	64.88	45.32	57.72	2.96118e+06	2.65606e+06	2.93765e+06	19.32	49.38	13.66	High	High	High	High	High	High	High	High	High
AAS95232.1	752	amino acid ABC transporter, amino acid-binding protein	80.882	44	10	72	10	275	30.4	7.18	100.33	10	0	1.109	2.292	2.262	0.85554	0.375621	0.501636	38.43	45.42	49.23	6.94551e+06	6.99756e+06	1.88454e+07	6.17	11.67	30.01	High	High	High	High	High	High	High	High	High
AAS96816.1	2343	amino acid ABC transporter, ATP-binding protein	23.337	19	6	22	6	242	27.2	6.54	13.2	6	0	0.613	0.767	2.334	0.280136	0.870611	0.513039	77.8	87.47	142.43	2.74487e+06	1.72765e+06	7.56748e+06	27.62	24.38	30.87	High	High	High	High	High	High	High	High	High
AAS95233.1	753	amino acid ABC transporter, ATP-binding protein	28.251	27	6	27	5	243	27.2	6.15	32.87	6	0	0.791	0.487	0.877	0.715905	0.404224	0.972027	54.52	42.93	102.7	3.67056e+06	2.43193e+06	2.02774e+06	15.42	12.08	12.38	High	High	High	High	High	High	High	High	High
AAS95714.1	1236	amino acid ABC transporter, ATP-binding protein	36.281	34	7	24	6	247	27.5	6.07	31.51	7	1	0.673	0.69	0.885	0.388118	0.809363	0.976855	51.61	60.32	53.98	3.42454e+06	1.61981e+06	2.31768e+06	8.24	18.02	12.1	High	High	High	High	High	High	High	High	High
AAS94871.1	388	amino acid ABC transporter, ATP-binding protein	24.761	25	6	29	6	255	27.6	6.8	19.71	6	0	0.922	0.937	0.947	0.952046	0.993965	0.985375	81.72	47.34	89.67	1.98745e+06	2.48017e+06	1.59613e+06	12.74	21.96	37.17	High	High	High	High	High	High	High	High	High
AAS95716.1	1238	amino acid ABC transporter, periplasmic amino acid-binding protein	108.95	71	14	96	14	246	26.8	6.38	140.74	14	0	1.245	5.057	4.266	0.592095	0.00350399	0.0343089	112.59	51.76	99.27	5.14231e+06	9.46681e+06	2.74344e+07	67.35	17.76	4.69	High	High	High	High	High	High	High	High	High
AAS95446.1	966	amino acid ABC transporter, periplasmic amino acid-binding protein	83.217	41	11	75	11	272	30.7	8.13	118.64	11	0	0.748	2.573	3.828	0.606826	0.238789	0.061047	65.01	85.79	61.43	6.32283e+06	7.12217e+06	2.23963e+07	56.11	14.39	34.74	High	High	High	High	High	High	High	High	High
AAS95156.1	675	amino acid ABC transporter, periplasmic amino acid-binding protein	84.763	44	11	69	11	273	30.2	7.42	95.64	11	0	0.664	1.692	2.37	0.270112	0.793085	0.443935	66.97	57.26	65.29	6.21892e+06	4.66931e+06	9.00766e+06	8.57	34.04	24.1	High	High	High	High	High	High	High	High	High
AAS94869.1	386	amino acid ABC transporter, periplasmic amino acid-binding protein	81.368	47	13	70	13	249	27.7	7.96	104.52	13	0	1.261	2.193	1.328	0.5126	0.440902	0.969065	54.33	53.37	52.58	8.57121e+06	1.65599e+07	1.7407e+07	21.72	17.29	13.35	High	High	High	High	High	High	High	High	High
AAS96815.1	2342	amino acid ABC transporter, periplasmic amino acid-binding protein	65.459	49	11	80	11	270	29.7	7.24	129.82	11	0	0.947	1.711	1.242	0.976581	0.754122	0.984176	61.75	69.73	76.82	2.17935e+07	2.84057e+07	2.14813e+07	25.33	48.74	15.32	High	High	High	High	High	High	High	High	High
AAS95192.1	712	amino acid ABC transporter, periplasmic-binding protein	173.879	59	23	217	23	376	40.2	8.12	345.35	23	0	1.901	5.107	2.444	0.00211772	0.00328032	0.403588	94.03	79.77	50.01	1.891e+07	2.99604e+07	8.35267e+07	18.86	5.51	8.64	High	High	High	High	High	High	High	High	High
AAS94870.1	387	amino acid ABC transporter, permease protein, His/Glu/Gln/Arg/opine family	8.384	9	2	15	2	225	24.5	9.51	18.5	2	0	1.856	1.262	0.723	0.226693	0.964364	0.896116	50.36	51.37	26.1	1.19078e+06	1.71153e+06	1.31112e+06	17.08	39.44	17.08	High	High	High	High	High	High	High	High	High
AAS95447.1	967	amino acid ABC transporter, permease protein, His/Glu/Gln/Arg/opine family	50.284	32	9	50	9	337	37.4	9.07	57.06	9	0	1.136	1.25	1.384	0.832815	0.968404	0.950814	44.17	39.5	48.4	6.24264e+06	6.51757e+06	7.66548e+06	7.72	17.01	11.8	High	High	High	High	High	High	High	High	High
AAS95715.1	1237	amino acid ABC transporter, permease protein, His/Glu/Gln/Arg/opine family	20.543	25	5	21	5	256	28.7	8.81	17.73	5	0	0.797	0.74	0.858	0.748453	0.891747	0.964502	32.6	45.5	35.37	2.79029e+06	2.2972e+06	1.68253e+06	28.8	2.44	25.3	High	High	High	High	High	High	High	High	High
AAS96813.1	2340	amino acid ABC transporter, permease protein, His/Glu/Gln/Arg/opine family	8.449	13	2	10	2	230	25.5	9.33	12.66	2	0	1.059	1.153	1.093	0.98642	0.993965	0.997949	20.98	25.37	20.58	322529	327868	372997	12.82	8.28	11.04	High	High	High	Peak Found	High	Not Found	High	High	High
AAS97518.1	3047	aminotransferase, class IV	19.935	20	5	19	5	315	34.2	5.55	10.67	5	0	0.896	0.672	0.84	0.928474	0.817705	0.961158	47.28	40.52	51.45	2.83466e+06	2.20192e+06	1.63196e+06	24.12	17.34	13.19	High	High	Peak Found	High	High	High	High	High	High
AAS95247.1	767	aminotransferase, class V	15.958	11	3	13	3	368	39	5.92	10.26	3	0	0.698	1.952	2.995	0.695868	0.717955	0.240463	52.23	58.27	53.3	967650	724851	1.64341e+06	35.76	31.31	16.07	High	High	High	High	Peak Found	Peak Found	High	High	High
AAS94976.1	494	aminotransferase, class V	83.412	42	11	83	11	389	41.3	7.78	106.03	11	0	1.021	1.389	1.337	0.95033	0.930904	0.964272	51.76	61.09	67.25	9.87427e+06	1.06229e+07	1.31162e+07	5.38	11.08	28.31	High	High	High	High	High	High	High	High	High
AAS96132.1	1655	aminotransferase, classes I and II	120.421	54	17	155	17	388	42.6	5.59	232.62	17	0	0.81	1.412	1.562	0.756108	0.921278	0.876719	60.99	60.26	65.12	2.5832e+07	2.06114e+07	3.10202e+07	18.18	18.49	23	High	High	High	High	High	High	High	High	High
AAS95371.1	891	aminotransferase, classes I and II	75.775	43	17	115	17	397	44.6	7.91	141.72	17	0	1.069	1.508	1.283	0.900092	0.871992	0.978407	42.42	44.74	47.25	1.69807e+07	2.26109e+07	2.30021e+07	15.98	10.99	13.82	High	High	High	High	High	High	High	High	High
AAS96837.1	2364	aminotransferase, classes I and II	117.387	55	16	116	16	388	42.8	6.04	206.31	16	0	1.53	1.294	0.986	0.0911949	0.962411	0.984176	42.02	73.22	76.11	1.53193e+07	2.23818e+07	2.02882e+07	17.63	6.26	28.12	High	High	High	High	High	High	High	High	High
AAS94835.1	352	aminotransferase, DegT/DnrJ/EryC1/StrS family	34.914	17	6	18	6	393	44.6	6.21	32.33	6	0	0.586	1.708	2.167	0.394068	0.793085	0.574421	61.89	82.55	49.15	1.41581e+06	804301	2.5294e+06	39.6	11.95	11.05	Peak Found	High	High	High	Peak Found	Not Found	High	High	High
AAS97481.1	3010	aminotransferase, DegT/DnrJ/EryC1/StrS family	30.132	21	7	17	7	392	42.7	6.2	10.67	7	0	0.941	0.69	0.787	0.96174	0.870104	0.949735	46.25	55.93	47.11	1.73011e+06	1.34311e+06	1.09846e+06	21.67	117.29	9.54	High	High	High	High	High	High	High	High	High
AAS94819.1	336	aminotransferase, DegT/DnrJ/EryC1/StrS family	31.944	19	6	25	6	446	48.6	8	29.29	6	0	1.098	0.874	0.923	0.944842	0.966741	0.984176	48.21	36.01	46.92	1.86043e+06	1.81436e+06	1.92209e+06	12.24	5.19	16.43	High	High	High	High	High	Peak Found	High	High	High
AAS97476.1	3005	aminotransferase, DegT/DnrJ/EryC1/StrS family	44.679	41	11	36	11	344	38.2	6.2	32.84	11	0	0.587	0.734	1.221	0.0933834	0.846236	0.986867	108.74	64.03	99.34	4.60748e+06	2.76993e+06	4.55744e+06	10.56	30.25	29.54	High	High	High	High	High	Peak Found	High	High	High
AAS94559.1	75	aminotransferase, DegT/DnrJ/EryC1/StrS family	46.017	22	7	37	7	377	40.7	6.4	52.94	7	0	0.816	0.878	1.22	0.777515	0.960391	0.997848	54.29	52.86	53.18	4.48349e+06	4.56665e+06	4.54035e+06	24.18	5.1	24.61	High	High	High	High	High	High	High	High	High
AAS97590.1	3119	AMP-binding enzyme family protein	58.848	30	11	58	11	564	62.1	6.98	65.41	11	0	1.177	0.861	0.722	0.766435	0.944925	0.804386	45.28	48.9	53.34	5.71953e+06	7.25535e+06	5.08654e+06	17.25	9.88	10.26	High	High	High	High	High	High	High	High	High
AAS97536.1	3065	AMP-binding enzyme family protein	102.554	35	19	127	19	550	62.2	5.6	179.67	19	0	1.251	1.552	1.442	0.538376	0.850155	0.925947	68.05	49.52	60.02	1.2429e+07	1.58073e+07	1.87477e+07	8.2	21.29	24.98	High	High	High	High	High	High	High	High	High
AAS96723.1	2250	AMP-binding protein	75.457	24	12	78	12	551	60.6	5.74	109.91	12	0	1.417	1.723	1.309	0.206274	0.745742	0.972291	59.17	61.26	56.52	8.99224e+06	1.10087e+07	1.11154e+07	18.01	27.83	25.08	High	High	High	High	High	High	High	High	High
AAS96416.1	1940	anaerobic glycerol-3-phosphate dehydrogenase, A subunit, putative	83.116	33	14	68	14	516	55.7	5.77	72.64	14	0	0.861	1.088	1.558	0.866809	0.994465	0.896116	90.97	60.13	93.94	4.74771e+06	3.57808e+06	7.17527e+06	18.35	12.97	7.24	High	High	High	High	High	High	High	High	High
AAS96415.1	1939	anaerobic glycerol-3-phosphate dehydrogenase, B subunit, putative	44.649	26	8	40	8	427	45.7	6.6	47.31	8	0	0.799	1.014	1.315	0.733807	0.993965	0.974388	41.73	41.63	43.55	4.50769e+06	3.28376e+06	4.36935e+06	25.07	19	14.46	High	High	High	High	High	High	High	High	High
AAS97145.1	2673	anaerobic glycerol-3-phosphate dehydrogenase, subunit A, truncation	36.683	25	9	28	9	389	41.9	6.71	12.65	9	0	0.875	1.514	1.865	0.915461	0.881856	0.737184	64.41	95.94	58.43	2.23979e+06	1.14334e+06	3.24342e+06	11.06	6.83	12.11	High	High	High	High	High	Not Found	High	High	High
AAS97419.1	2947	anaerobic ribonucleoside-triphosphate reductase, putative	97.435	29	17	88	15	689	78.2	6.39	101.59	17	2	0.725	1.298	1.855	0.45638	0.960391	0.737328	47.8	55.02	57.45	9.46969e+06	7.0096e+06	1.23271e+07	7.35	36.3	24.82	High	High	High	High	High	High	High	High	High
AAS94950.1	467	anthranilate phosphoribosyltransferase	66.236	45	9	32	9	332	35.2	6.52	55.7	9	0	0.834	2.493	4.103	0.862265	0.272372	0.0384796	28.98	71.94	63.81	2.25358e+06	1.69893e+06	6.22806e+06	13.12	115.46	7.92	High	High	High	High	High	Peak Found	High	High	High
AAS94948.1	465	anthranilate synthase, component I	135.362	43	20	111	20	532	57.4	6.62	186.86	20	0	0.269	1.647	6.209	2.42413e-10	0.802021	0.00228004	58.36	57.13	63.21	1.17158e+07	2.77749e+06	1.86446e+07	11.73	8.32	16.31	High	High	High	High	High	High	High	High	High
AAS94949.1	466	anthranilate synthase, glutamine amidotransferase component	32.102	36	5	27	5	209	22.4	6.4	37.68	5	0	0.567	1.37	2.7	0.280136	0.93275	0.322114	47.96	82.17	55.1	1.83147e+06	822917	2.3524e+06	50.11	30.46	39.9	High	High	High	High	High	Peak Found	High	High	High
AAS94341.1	A0123	anti-anti-sigma factor	7.355	23	2	4	2	111	11.6	5.4	2.26	2	0	0.962	1.174	0.945	0.971674	0.993965	0.997848	82.34	135.81	95.57	912685	414767	478643	67.7	30.68	11.19	High	Peak Found	Not Found	Peak Found	High	Not Found	Peak Found	High	High
AAS96720.1	2247	antioxidant, AhpC/Tsa family	68.741	59	10	51	10	204	22.2	5.41	91.14	10	0	1.081	8.469	8.506	0.938474	1.57674e-05	0.000124568	70.16	66.5	48.8	3.01322e+06	3.0051e+06	1.64555e+07	35.97	24.05	22.58	High	High	High	High	High	High	High	High	High
AAS95020.1	538	AP endonuclease, family 2	18.673	14	3	12	3	262	29.3	6.37	18.94	3	0	0.765	1.568	1.913	0.837433	0.885756	0.734891	23.6	60.91	34.51	515508	457009	1.00426e+06	18.34	21.2	34.98	Peak Found	High	High	Peak Found	High	Not Found	High	High	High
AAS95303.1	823	arginine biosynthesis bifunctional protein ArgJ	74.24	45	13	56	13	393	41.3	5.49	63.32	13	0	1.018	2.034	1.634	0.971674	0.547173	0.852176	53.83	65.49	67.58	3.38107e+06	2.57967e+06	5.6698e+06	35.94	6.91	32.86	High	High	High	High	High	Not Found	High	High	High
AAS94900.1	417	arginine decarboxylase	92.488	29	17	65	17	659	74.4	5.52	37.6	17	0	0.666	1.106	1.821	0.272642	0.993965	0.7713	48.15	56.32	59.9	5.96076e+06	4.93761e+06	5.2647e+06	5.29	1.83	15.04	High	High	High	High	High	High	High	High	High
AAS96070.1	1592	arginine N-succinyltransferase, beta subunit, putative	133.946	47	23	112	23	580	61.6	5.05	189.65	23	0	0.693	1.024	1.389	0.321369	0.993965	0.949735	60.28	47.67	50.78	1.45592e+07	1.41589e+07	1.46721e+07	20.45	14.79	14.63	High	High	High	High	High	High	High	High	High
AAS95574.1	1094	argininosuccinate lyase	152.947	56	23	115	23	460	51	5.43	195.05	23	0	1.026	1.176	1.263	0.945181	0.993965	0.98323	61.46	60.71	67.21	1.52185e+07	1.53995e+07	1.98076e+07	6.05	15.9	24.89	High	High	High	High	High	High	High	High	High
AAS95575.1	1095	argininosuccinate synthase	96.896	39	16	131	16	396	43.9	6.13	222.84	16	0	1.094	1.254	1.27	0.857045	0.966741	0.980346	60.23	52.08	60.64	2.17754e+07	2.6546e+07	2.84524e+07	9.55	4.25	19.79	High	High	High	High	High	High	High	High	High
AAS95726.1	1248	arginyl-tRNA synthetase	100.863	43	19	74	19	551	60.5	5.43	85.65	19	0	1.039	2.843	3.117	0.95452	0.186276	0.165235	94.42	56.98	94.63	3.9211e+06	7.02128e+06	8.92595e+06	16.74	31.96	9.09	High	High	High	High	High	High	High	High	High
AAS94875.1	392	aromatic aminotransferase	59.844	38	11	58	11	399	43	5.74	64.3	11	0	1.022	0.857	0.932	0.95033	0.940685	0.972027	51.89	59.48	87.06	9.34461e+06	8.82779e+06	9.14081e+06	12.34	5.61	15.97	High	High	High	High	High	High	High	High	High
AAS95295.1	815	AsmA family protein	75.665	24	16	73	16	701	73.2	7.03	74.59	16	0	1.068	0.999	0.904	0.900092	0.993965	0.958474	53.54	65.45	47.57	8.60328e+06	8.21626e+06	8.82758e+06	14.8	55.59	18.52	High	High	High	High	High	High	High	High	High
AAS94382.1	A0073	asparagine synthase (glutamine-hydrolyzing), putative	49.514	14	13	59	13	889	98.7	6.43	54.16	13	0	0.819	0.828	0.847	0.777515	0.92754	0.912799	58.62	53.91	59.57	5.66751e+06	4.65841e+06	3.94245e+06	149.23	20.77	25.29	High	High	High	High	High	High	High	High	High
AAS94491.1	7	asparaginyl-tRNA synthetase	114.288	32	15	154	15	461	51.9	5.3	280.2	15	0	1.092	0.74	0.639	0.861907	0.844789	0.717654	36.1	56.36	58.65	3.00823e+07	3.65382e+07	2.11967e+07	10.21	4.32	24.32	High	High	High	High	High	High	High	High	High
AAS97693.1	3223	aspartate aminotransferase	70.279	44	13	66	13	390	42.5	5.92	52.3	13	0	1.074	0.596	0.508	0.88675	0.585407	0.422683	53.7	39.62	38.78	6.49075e+06	9.97898e+06	3.89445e+06	31.19	19.13	19.24	High	High	High	High	High	High	High	High	High
AAS95321.1	841	aspartate aminotransferase, putative	63.995	37	12	89	12	393	42.5	5.6	136.28	12	0	1.279	1.344	0.979	0.465616	0.94918	0.98323	57.54	60.17	48.44	1.48235e+07	1.96376e+07	1.90757e+07	15.54	15.29	23.47	High	High	High	High	High	High	High	High	High
AAS96347.1	1871	aspartate ammonia-lyase	18.406	19	6	10	6	468	50.3	5.45	4.11	6	0	0.437	1.479	1.039	0.215262	0.940685	0.999667	126.57	98.94	128.94	424608	230568	507120	20.45	9.21	6.5	High	High	Peak Found	High	Peak Found	Not Found	High	High	High
AAS96243.1	1766	aspartate ammonia-lyase, putative	14.094	8	3	8	3	470	49.8	6.24	9.07	3	0	1.752	0.183	0.118	0.388092	0.0277056	0.00465123	69.09	64.25	29.62	967737	810273	88908	34.51	42.45	16.16	High	High	High	High	High	High	Peak Found	Not Found	High
AAS97373.1	2901	aspartate carbamoyltransferase	22.514	24	6	26	6	317	34.6	8.65	24.93	6	0	0.867	0.968	1.158	0.915461	0.993965	0.984268	48.58	110.7	137.19	1.56261e+06	1.685e+06	1.36274e+06	32.07	68.05	44.23	High	High	High	High	High	Peak Found	High	High	High
AAS96389.1	1913	aspartate kinase, monofunctional class	104.204	37	13	122	13	408	44	5.44	180.38	13	0	0.938	1.156	1.23	0.971674	0.993965	0.984176	52.49	43.39	47.82	2.09458e+07	1.8797e+07	2.36446e+07	17.63	3.55	12.29	High	High	High	High	High	High	High	High	High
AAS97519.1	3048	aspartate-semialdehyde dehydrogenase	137.731	55	17	210	17	349	38.3	5.71	346.19	17	0	0.826	0.889	1.079	0.796955	0.957114	0.998377	58.07	46.39	53.09	4.38935e+07	4.33916e+07	4.01566e+07	14.23	11.83	15.68	High	High	High	High	High	High	High	High	High
AAS97836.1	3367	aspartyl-tRNA synthetase	138.294	40	25	126	25	610	69.2	5.81	150.49	25	0	0.907	1.615	1.561	0.944842	0.819244	0.876719	60.24	54.78	56.46	1.37159e+07	1.86471e+07	2.27362e+07	27.83	34.61	10.89	High	High	High	High	High	High	High	High	High
AAS94598.1	114	ATP phosphoribosyltransferase	135.278	59	14	171	14	293	32.3	6.06	249.5	14	0	1.06	0.933	1.077	0.914489	0.969212	0.998377	49.87	57.39	71.75	2.23184e+07	2.48013e+07	2.04513e+07	12.23	4.61	15.15	High	High	High	High	High	High	High	High	High
AAS95259.1	779	ATP synthase F0, B subunit, putative	109.402	63	18	246	18	176	19.6	7.4	473.38	18	0	0.699	0.553	0.744	0.343282	0.489075	0.833374	66.45	63.03	64.66	8.9777e+07	7.31793e+07	5.98773e+07	10.9	7.12	9.99	High	High	High	High	High	High	High	High	High
AAS95260.1	780	ATP synthase F0, B' subunit, putative	124.552	59	11	229	11	131	14.1	9.09	427.35	11	0	0.875	0.558	0.618	0.908259	0.501676	0.677894	55.22	56.81	41.17	8.70236e+07	7.34957e+07	4.76841e+07	16.31	3.21	10.78	High	High	High	High	High	High	High	High	High
AAS95257.1	777	ATP synthase, F1 alpha subunit	454.062	62	43	2141	43	502	54.5	6.25	4095.5	43	0	0.892	0.618	0.64	0.93198	0.654929	0.717654	50.71	52.85	52.52	9.14487e+08	1.00236e+09	6.0279e+08	5.09	6.54	1.98	High	High	High	High	High	High	High	High	High
AAS95255.1	775	ATP synthase, F1 beta subunit	451.854	74	26	2072	26	470	50.7	5.1	4307.85	26	0	0.852	0.663	0.745	0.858219	0.728533	0.833374	61.09	60.02	73.03	8.13171e+08	7.66136e+08	5.16612e+08	1.72	13.34	7.6	High	High	High	High	High	High	High	High	High
AAS95258.1	778	ATP synthase, F1 delta subunit	114.901	63	19	283	19	183	20.1	9.48	476.46	19	0	0.712	0.557	0.716	0.395083	0.499538	0.804386	52.72	60.77	68.53	7.98982e+07	6.80084e+07	4.52269e+07	6.9	18.26	10.64	High	High	High	High	High	High	High	High	High
AAS95254.1	774	ATP synthase, F1 epsilon subunit	36.199	27	5	59	5	134	14.7	7.64	115.34	5	0	0.926	0.482	0.564	0.962046	0.318368	0.558076	56.99	66.23	51.41	1.75733e+07	1.51315e+07	6.94596e+06	18.27	15.08	20.76	High	High	High	High	High	High	High	High	High
AAS95256.1	776	ATP synthase, F1 gamma subunit	179.662	58	18	460	18	291	31.7	8.7	731.24	18	0	0.717	0.609	0.95	0.419067	0.630332	0.976855	69.61	61.38	74.81	1.1602e+08	1.01725e+08	6.91212e+07	4.72	7.54	13.79	High	High	High	High	High	High	High	High	High
AAS95589.1	1109	ATPase domain protein	69.192	32	11	87	11	340	38.2	7.23	142.33	11	0	0.914	0.991	1.133	0.952046	0.993965	0.998377	41.4	56.13	45.03	1.32599e+07	9.55158e+06	1.0969e+07	14.25	12.36	8.2	High	High	High	High	High	High	High	High	High
AAS96163.1	1686	ATPase, AAA family	16.004	10	4	10	4	411	46	8.16	7.9	4	0	0.908	0.933	0.699	0.952049	0.993965	0.900555	56.32	42.47	35.51	798127	693926	437383	2.5	7.84	20.07	High	High	High	High	High	Peak Found	High	High	High
AAS96224.1	1747	ATPase, histidine kinase-, DNA gyrase B-, and HSP90-like domain protein	89.98	22	17	61	17	981	111.2	6.19	56.6	17	0	0.902	1.026	1.096	0.929563	0.993965	0.998377	70.53	61.33	55.55	4.87153e+06	3.94565e+06	4.98384e+06	12.29	48.69	6.44	High	High	High	High	High	High	High	High	High
AAS96080.1	1602	ATP-dependent Clp protease, ATP-binding subunit ClpA	117.162	34	25	86	25	776	84.6	6.35	98.8	25	0	0.989	0.805	0.822	0.971674	0.91409	0.905221	84.66	69.37	100.05	1.11998e+07	1.89913e+07	1.04387e+07	1.82	16.87	22.35	High	High	High	High	High	High	High	High	High
AAS96350.1	1874	ATP-dependent Clp protease, ATP-binding subunit ClpB	217.936	47	37	183	36	865	97.2	5.5	224.65	37	1	1.215	1.296	1.154	0.613243	0.961193	0.997949	56.95	61.91	77.95	2.1012e+07	2.40567e+07	2.1234e+07	14.55	14.73	25.33	High	High	High	High	High	High	High	High	High
AAS95814.1	1336	ATP-dependent Clp protease, ATP-binding subunit ClpX	102.491	44	18	141	18	417	45.6	5.59	170.98	18	0	0.819	0.817	1.042	0.783539	0.918287	0.997848	59.06	71.89	54.78	1.38989e+07	1.71355e+07	1.19247e+07	5.54	17.25	9.66	High	High	High	High	High	High	High	High	High
AAS94936.1	453	ATP-dependent DNA helicase, UvrD/REP family	180.756	39	31	172	31	1127	121.5	6.58	153.81	31	0	1.17	0.776	0.666	0.708193	0.885884	0.743163	40.03	37.95	58.63	1.6531e+07	2.11453e+07	1.23213e+07	5.73	15.34	8.45	High	High	High	High	High	High	High	High	High
AAS94640.1	156	ATP-dependent DNA helicase, UvrD/REP family	62.892	28	14	43	14	719	80.1	7.03	34.56	14	0	0.929	1.35	0.992	0.952049	0.947727	0.984176	96.95	75.56	88.7	3.06125e+06	4.02057e+06	3.0117e+06	9.77	6.09	7.68	High	High	High	High	High	High	High	High	High
AAS95815.1	1337	ATP-dependent protease La	172.912	42	35	167	34	821	91.6	5.95	185.9	35	1	0.97	0.91	0.896	0.996749	0.964364	0.953073	49.72	65.11	57.99	1.77597e+07	1.7409e+07	1.40503e+07	12.09	19.45	24.26	High	High	High	High	High	High	High	High	High
AAS95669.1	1191	ATP-dependent protease La, putative	118.258	38	25	115	24	856	93.8	5.38	102.45	25	0	1.067	0.75	0.703	0.903282	0.85762	0.793213	62.15	54.29	53.45	1.13659e+07	1.31051e+07	1.05437e+07	103.04	13.64	16.81	High	High	High	High	High	High	High	High	High
AAS95950.1	1472	ATP-dependent protease, putative	124.647	33	23	128	23	821	90.7	5.41	168.78	23	0	1.031	0.845	0.652	0.942506	0.937226	0.730157	54.58	70.49	39.35	1.91927e+07	1.74424e+07	1.35712e+07	10.87	1.28	10.16	High	High	High	High	High	High	High	High	High
AAS96369.1	1893	ATP-dependent protease, putative	96.575	26	18	99	18	806	89.5	6.8	157	18	0	0.958	0.789	0.819	0.99509	0.897678	0.905221	44.84	40.44	51.24	1.21036e+07	1.25428e+07	9.64957e+06	9.09	13.03	15.21	High	High	High	High	High	High	High	High	High
AAS96458.1	1982	ATP-dependent RNA helicase RhlE	44.131	25	10	34	10	462	49.9	10.73	34.43	10	0	1.36	1.023	0.664	0.585069	0.993965	0.7713	48.63	49.75	48.3	2.22309e+06	2.67339e+06	2.48812e+06	3.3	165.99	18.41	High	High	High	High	Peak Found	High	High	High	High
AAS97559.1	3088	ATP-dependent RNA helicase, DEAD/DEAH box family	127.927	40	17	143	17	577	64.1	6.98	222.82	17	0	0.839	1.143	1.305	0.832815	0.993965	0.974669	45.7	38.46	46.05	1.482e+07	1.33055e+07	1.70616e+07	12.3	9.95	5.35	High	High	High	High	High	High	High	High	High
AAS97778.1	3310	ATP-dependent RNA helicase, DEAD/DEAH family	67.17	30	11	31	11	532	58.3	6.84	41.13	11	0	0.976	2.343	2.005	0.984707	0.478978	0.67044	79.25	84.15	70.23	1.17788e+06	885634	1.9623e+06	28.81	21.34	37.8	Peak Found	High	High	High	Peak Found	Not Found	High	High	High
AAS96364.1	1888	ATP-NAD kinase domain protein	43.132	42	8	28	8	299	31.1	5.95	29.9	8	0	1.149	0.984	1.131	0.875357	0.993965	0.99805	56.29	50.9	72.73	2.36973e+06	2.73166e+06	2.68271e+06	10.77	34.93	26.43	High	High	Peak Found	High	High	High	High	High	High
AAS95396.1	916	AT-rich DNA-binding protein	79.901	58	11	84	11	214	23.9	8.28	157.87	11	0	0.86	1.279	1.165	0.870738	0.964364	0.997949	46.38	64.95	54.06	1.54847e+07	1.41427e+07	1.48987e+07	12.46	18.68	5.36	High	High	High	High	High	High	High	High	High
AAS94515.1	31	AzlC family protein	68.263	30	9	63	9	328	33	7.71	83.79	9	0	0.715	1.098	1.916	0.408021	0.993965	0.717654	46.91	61.2	63.13	1.44365e+07	4.50544e+06	1.3408e+07	24.28	44.88	6.56	High	High	High	High	High	High	High	High	High
AAS95875.1	1397	bacterioferritin	81.296	43	10	88	10	179	19.9	4.84	141.25	10	0	0.728	2.17	3.002	0.465616	0.452704	0.195995	51.45	57.72	62.92	1.74033e+07	1.22153e+07	3.1147e+07	25.94	27.18	17.34	High	High	High	High	High	High	High	High	High
AAS95294.1	814	bacterioferritin comigratory protein, putative	9.561	12	2	8	2	161	17.7	6.54	15.13	2	0	1.871	4.953	1.918	0.423333	0.0398589	0.730157	32.33	63.6	90.18	395627	739550	1.25146e+06	82.29	41.68	32.24	Peak Found	Peak Found	High	High	High	High	High	High	High
AAS97571.1	3100	biopolymer transport protein, ExbD/TolR family	19.771	27	3	9	3	139	15.5	5.21	20.6	3	0	0.94	1.061	0.924	0.96948	0.993965	0.992361	16.13	43.76	16.13	1.31775e+06	615752	1.51582e+06	15.52	9.68	7.09	Peak Found	High	Peak Found	Peak Found	High	Not Found	High	High	High
AAS97029.1	2557	birA bifunctional protein	22.851	17	5	17	5	330	35.3	6.73	21.9	5	0	1.249	0.659	0.457	0.539852	0.804124	0.308321	75.22	62.52	73.68	2.97945e+06	1.52825e+07	1.20605e+06	93.66	58.02	32.44	High	High	High	High	High	High	High	High	High
AAS95550.1	1070	branched chain amino acid ABC transporter, ATP-binding protein	44.386	21	9	37	9	524	56.5	5.53	32.59	9	0	1.343	1.153	0.896	0.321696	0.993965	0.953073	43.94	70.34	63.65	1.40662e+07	1.79491e+07	1.37472e+07	11.31	6.63	9.03	High	High	High	High	High	High	High	High	High
AAS95195.1	715	branched-chain amino acid ABC transporter, ATP binding protein	22.647	16	4	22	4	255	27.7	6.7	28.63	4	0	0.649	1.068	1.445	0.262681	0.996375	0.921499	61.34	47.74	60.39	4.26237e+06	2.38064e+06	4.01792e+06	17.19	109.43	19.4	High	High	High	High	High	High	High	High	High
AAS95196.1	716	branched-chain amino acid ABC transporter, ATP-binding protein	69.814	58	10	69	10	238	25.7	6.4	59.1	10	0	0.888	1.143	1.415	0.926251	0.993965	0.943933	38.57	40.75	40.86	6.38591e+06	5.59267e+06	7.36632e+06	11.57	16.37	6.08	High	High	High	High	High	High	High	High	High
AAS97667.1	3197	branched-chain amino acid aminotransferase	44.129	24	7	89	7	309	34.4	6.62	156.42	7	0	1.075	0.924	0.849	0.88342	0.966741	0.925947	45.68	52.21	36.39	1.94778e+07	2.53709e+07	2.1724e+07	22.11	3.61	13.15	High	High	High	High	High	High	High	High	High
AAS95109.1	628	butyrate kinase	24.609	15	4	17	4	372	39.9	6.77	19.72	4	0	0.775	1.332	1.747	0.819845	0.960391	0.777565	54.47	43.66	49.35	939888	911210	1.30123e+06	11.85	12.41	19.92	High	High	High	High	Peak Found	Not Found	High	High	High
AAS97225.1	2753	C_GCAxxG_C_C family protein	7.626	13	3	7	3	275	29	9.51	0	3	0	0.979	0.777	1.072	0.971674	0.930904	0.999667	20.49	34.3	37.78	323864	151649	226413	3.44	30.53	21.3	High	High	Not Found	High	Peak Found	Not Found	Peak Found	High	High
AAS96780.1	2307	C4-type zinc finger protein, DksA/TraR family	17.848	55	3	10	3	73	8	4.88	7.1	3	0	2.704	2	0.749	0.13948	0.76523	0.946251	57.93	63.14	43.19	225268	419747	532868	19.15	38.45	41.92	Peak Found	High	Peak Found	High	High	Not Found	Peak Found	High	High
AAS94646.1	162	carbamoyl-phosphate synthase, large subunit	153.685	27	30	162	30	1077	117.8	5.16	169.64	30	0	1.315	0.487	0.391	0.38195	0.331751	0.161122	46.02	59.33	52.35	2.02041e+07	2.82215e+07	1.11137e+07	9.96	15.67	19.49	High	High	High	High	High	High	High	High	High
AAS97584.1	3113	carbamoyl-phosphate synthase, small subunit	48.074	22	8	73	8	375	40.7	6.87	80.37	8	0	0.89	0.893	0.871	0.929563	0.964089	0.945273	38.04	47.01	52.42	8.69156e+06	8.16705e+06	6.10119e+06	8.84	30.58	34.33	High	High	High	High	High	High	High	High	High
AAS94644.1	160	carbohydrate isomerase, KpsF/GutQ family	38.841	29	8	25	8	331	34.8	5.81	36.23	8	0	1.058	0.952	1.297	0.963668	0.993965	0.964272	74	67.23	71.19	2.23725e+06	1.74272e+06	2.4299e+06	49.51	38.39	23.86	High	High	High	High	High	High	High	High	High
AAS95468.1	988	carbohydrate kinase, PfkB family	28.573	13	3	17	3	308	33.2	5.11	17.42	3	0	1.274	1.112	0.574	0.703983	0.993965	0.63233	97.5	128.24	98.22	2.10143e+06	3.06417e+06	2.40277e+06	11.94	1.42	30.67	High	High	High	High	Peak Found	High	High	High	High
AAS96822.1	2349	carbohydrate phosphorylase family protein	165.426	37	26	207	26	855	97.3	6.35	267.94	26	0	0.821	1.027	1.331	0.785933	0.993965	0.968173	71.6	72.11	66.48	3.45503e+07	2.80539e+07	2.85702e+07	14.44	20.68	17.75	High	High	High	High	High	High	High	High	High
AAS96571.1	2098	carbon monoxide dehydrogenase	56.529	19	10	48	10	629	66.6	7.36	56.32	10	0	0.709	0.909	0.987	0.423198	0.964364	0.984176	63.66	68.62	70.12	6.1945e+06	3.42458e+06	3.24577e+06	9.42	57.71	3.4	High	High	High	High	High	High	High	High	High
AAS95080.1	599	carbon starvation protein A, putative	51.957	14	6	199	2	473	50.8	8.68	326.04	6	0	0.77	0.852	0.785	0.623627	0.938238	0.876979	48.48	44.69	47.57	2.66763e+07	2.26709e+07	1.94351e+07	32.71	16.49	15.21	High	High	High	High	High	High	High	High	High
AAS95079.1	598	carbon starvation protein A, putative	51.834	14	6	174	2	473	50.8	8.54	293.05	6	5	1.007	1.019	1.018	0.96174	0.993965	0.991103	41.9	47.05	45.96	5.59618e+07	6.15872e+07	9.51867e+07	29.36	17.98	14.84	High	High	High	High	High	High	High	High	High
AAS96254.1	1777	carbonic anhydrase	20.128	25	4	21	4	245	27.7	5.9	17.99	4	0	0.627	0.364	0.493	0.357116	0.230802	0.616353	37.56	64.49	72.98	2.0874e+06	1.53116e+06	693957	14.05	16.6	18.49	High	High	High	High	High	High	High	High	High
AAS96809.1	2336	carboxyl-terminal protease	118.144	54	17	110	17	428	46.7	5.95	187.41	17	0	1.129	1.946	1.603	0.794001	0.59773	0.855965	65.55	72.9	62.6	1.69546e+07	1.73592e+07	2.43627e+07	29.89	33.3	13.72	High	High	High	High	High	High	High	High	High
AAS94907.1	424	cardiolipin synthetase	27.164	17	6	21	6	481	53.8	9.5	13.91	6	0	1.104	0.627	0.972	0.857041	0.666107	0.98323	122.01	68.74	89.23	5.06924e+06	9.73816e+06	4.95205e+06	9.83	18.58	23.45	High	High	Not Found	High	High	Not Found	High	High	High
AAS94368.1	A0091	catalase	183.239	50	24	326	24	485	54.7	7.05	529.13	24	0	0.801	0.673	0.867	0.728885	0.745742	0.943933	61.78	62.34	71.04	9.92628e+07	8.41241e+07	7.07828e+07	12.03	35.02	15.03	High	High	High	High	High	High	High	High	High
AAS95820.1	1342	cation ABC transporter, ATP-binding protein, putative	23.909	29	5	19	5	268	28.9	7.59	12.57	5	0	0.971	0.959	0.897	0.971674	0.993965	0.984176	26.6	37.4	35.03	1.36996e+06	1.42168e+06	1.13534e+06	5.66	3.71	22	High	High	High	High	High	Not Found	High	High	High
AAS95821.1	1343	cation ABC transporter, periplasmc-binding protein	46.751	27	8	32	8	335	36.5	7.2	39.86	8	0	1.06	2.164	2.335	0.957487	0.457185	0.505415	86.41	76.69	63.24	2.14838e+06	2.70712e+06	6.84232e+06	49.07	19.12	31.24	High	High	High	High	High	High	High	High	High
AAS96469.1	1993	cation-transporting ATPase, E1-E2 family	256.315	40	32	269	32	917	96.4	6.21	484	32	0	1.007	0.907	0.877	0.96174	0.964364	0.949043	55.72	53.56	52.71	4.6072e+07	4.40445e+07	3.66358e+07	3.98	18.88	5.15	High	High	High	High	High	High	High	High	High
AAS96326.1	1850	CBS domain protein	35.57	50	7	56	7	142	15.6	5.14	66.24	7	0	1.586	1.17	0.792	0.0562444	0.993965	0.882493	55.61	32.84	49.12	9.22847e+06	1.41846e+07	1.1441e+07	12.3	20.17	11.87	High	High	High	High	High	High	High	High	High
AAS96988.1	2516	CBS domain protein	47.887	74	12	48	12	161	17.9	5.06	73.29	12	0	1.406	1.759	1.267	0.293362	0.751887	0.98323	64.5	64.92	45.25	6.17159e+06	7.76492e+06	9.02949e+06	9.77	16.82	5.36	High	High	High	High	High	High	High	High	High
AAS97246.1	2774	CBS domain protein/ACT domain protein	104.595	51	14	298	14	227	25.6	5.57	368.62	14	0	0.907	0.642	0.677	0.944842	0.704627	0.762056	71.97	74.68	68.67	6.70655e+07	6.60585e+07	4.02946e+07	6.57	7.27	7.96	High	High	High	High	High	High	High	High	High
AAS96621.1	2148	CBS/transporter associated domain protein	21.083	16	5	18	5	464	49.7	5.05	10.6	5	0	1.133	1.175	0.9	0.936868	0.993965	0.984176	38.47	27.62	25.93	1.28491e+06	1.34126e+06	1.30502e+06	3.79	63.29	12.06	High	High	High	High	High	Peak Found	High	High	High
AAS96322.1	1846	CDP-diacylglycerol--glycerol-3-phosphate 3-phosphatidyltransferase	13.969	13	3	10	3	185	20.7	7.87	12.76	3	0	0.685	0.713	1.021	0.605655	0.901395	0.999667	57.49	79.73	69.24	1.56208e+06	1.03528e+06	866399	18.25	46.97	46.89	High	High	Not Found	High	High	Peak Found	High	High	Peak Found
AAS94557.1	73	CDP-glucose-4,6-dehydratase, putative	38.1	30	10	36	10	368	40.5	6.18	48.93	10	0	0.789	1.027	1.264	0.704309	0.993965	0.984176	56.97	59.48	49.53	4.54772e+06	3.61829e+06	5.22233e+06	18.31	15.55	17.99	High	High	High	High	High	High	High	High	High
AAS97844.1	3375	cell division ATP-binding protein FtsE, putative	32.414	33	5	19	5	238	26	9.14	29.23	5	0	1.337	1.027	0.833	0.777515	0.993965	0.970433	26.69	48.82	34.66	979318	1.26046e+06	1.32255e+06	7.13	4.3	20.51	High	High	High	High	High	Not Found	High	High	High
AAS95851.1	1373	cell division initiation protein DivIVA	45.796	51	7	33	7	169	18.6	6.09	59.97	7	0	0.642	0.47	0.834	0.229099	0.355106	0.943933	59.13	62.66	56.1	4.67903e+06	2.54912e+06	2.20168e+06	13.88	28.28	13.13	High	High	High	High	High	High	High	High	High
AAS96972.1	2500	cell division protein FtsA	202.87	68	25	213	25	408	43.4	5.81	373.64	25	0	1.043	0.679	0.741	0.933234	0.757453	0.833374	51.25	60.03	60.77	3.14779e+07	3.17571e+07	2.48033e+07	11.77	9.04	17.11	High	High	High	High	High	High	High	High	High
AAS95756.1	1278	cell division protein FtsH	180.969	42	24	236	24	656	71.7	5.4	374.58	24	0	0.965	0.779	0.847	0.999866	0.88822	0.925459	52.74	62.5	54	3.88746e+07	3.80319e+07	3.40948e+07	8.3	14.14	1.73	High	High	High	High	High	High	High	High	High
AAS96973.1	2501	cell division protein FtsQ, putative	8.438	12	2	6	2	278	30.4	8.92	0	2	0	0.815	1.463	2.186	0.900092	0.949453	0.730157	57.31	31.43	35.37	286744	232366	417391	12.89	13.94	13.22	High	Peak Found	Peak Found	High	Peak Found	Not Found	High	High	High
AAS96971.1	2499	cell division protein FtsZ	115.48	43	14	104	14	449	47.4	4.93	165.59	14	0	0.99	0.76	0.946	0.971674	0.870056	0.976855	54.21	80.01	68.07	1.3525e+07	1.23544e+07	1.01529e+07	13.25	3.87	9.47	High	High	High	High	High	High	High	High	High
AAS96453.1	1977	chaperonin, 10 kDa	50.604	71	8	45	8	95	10.3	5.26	80.29	8	0	0.973	2.443	1.23	0.996749	0.337544	0.984176	83.7	111.77	76.63	4.231e+06	9.1904e+06	1.13271e+07	78.41	19.87	51.31	High	High	High	High	High	High	High	High	High
AAS96452.1	1976	chaperonin, 60 kDa	685.258	82	50	2712	50	547	58.4	5.24	4814.22	50	0	0.887	1.055	1.149	0.926251	0.993965	0.99805	69.39	57.04	55.34	6.05035e+08	5.86637e+08	6.10636e+08	10.34	8.28	15.5	High	High	High	High	High	High	High	High	High
AAS96072.1	1594	chemotaxis protein CheA	101.132	30	18	70	18	708	77	4.98	89.19	18	0	0.642	0.907	1.421	0.213833	0.964364	0.949735	71.63	68.68	96.63	7.38555e+06	4.57873e+06	5.99839e+06	1.48	44.56	7.22	High	High	High	High	High	High	High	High	High
AAS96545.1	2072	chemotaxis protein CheA	250.327	43	38	254	38	1089	114	4.72	318.27	38	0	0.882	0.972	0.986	0.918347	0.993965	0.984176	57.69	56.03	62.58	3.14398e+07	2.40371e+07	2.94601e+07	5.68	23.48	4.24	High	High	High	High	High	High	High	High	High
AAS95472.1	992	chemotaxis protein CheV	55.013	39	10	54	10	320	35.2	6.27	78.71	10	0	0.969	1.912	2.565	0.996749	0.62874	0.350977	82	76.98	75.09	6.7727e+06	5.5526e+06	1.4306e+07	17.64	14.62	15.63	High	High	High	High	High	High	High	High	High
AAS94540.1	56	chemotaxis protein CheV	70.896	39	11	67	11	317	35.4	5.86	93.08	11	0	1.184	2.007	2.125	0.686217	0.552929	0.59336	54.85	65.08	71.8	1.0158e+07	1.07574e+07	1.88037e+07	3.4	26.97	25.71	High	High	High	High	High	High	High	High	High
AAS96380.1	1904	chemotaxis protein CheW	59.933	54	8	88	8	158	17.7	4.92	187.22	8	0	1.174	3.5	2.995	0.7061	0.0514552	0.197169	69.96	64.22	73.38	1.03297e+07	1.4333e+07	2.49858e+07	53	20.54	23.51	High	High	High	High	High	High	High	High	High
AAS96547.1	2074	chemotaxis protein CheW	19.505	21	4	14	4	216	23.9	5.03	13.83	4	0	0.965	1.428	2.095	0.971674	0.911883	0.621209	63.29	61.21	49.19	3.56584e+06	2.06479e+06	5.26644e+06	42.32	21.56	8.72	High	High	High	High	High	High	High	High	High
AAS96437.1	1961	chemotaxis protein CheW	8.548	14	2	6	2	167	18.3	5.78	3.71	2	0	3.069	1.45	0.6	0.00647867	0.924507	0.780775	73.86	58.13	69.18	560042	1.12958e+06	1.05019e+06	81.67	32.75	13.27	Peak Found	High	Peak Found	Peak Found	High	Peak Found	Peak Found	High	High
AAS95073.1	592	chemotaxis protein CheW	26.343	38	4	26	4	173	18.6	4.7	25.92	4	0	0.65	0.835	1.298	0.224136	0.930904	0.980209	64.99	55.22	41.03	5.58535e+06	3.93493e+06	4.58552e+06	44.33	29.07	28.16	High	High	High	High	High	High	High	High	High
AAS96071.1	1593	chemotaxis protein CheY	49.971	59	6	41	6	120	13	9.52	51.88	6	0	0.552	1.252	2.716	0.0481829	0.966741	0.333912	75.53	48.11	98.93	4.18835e+06	3.27319e+06	5.90763e+06	6.01	37.88	31.28	High	High	High	High	High	High	High	High	High
AAS96546.1	2073	chemotaxis protein CheY	35.262	53	6	53	6	122	13.7	6.13	46.22	6	0	1.654	3.695	1.331	0.148463	0.0458088	0.969446	73.47	98.96	49.37	2.12009e+06	3.44887e+06	4.1749e+06	12.61	22.14	48.68	High	High	High	High	High	High	High	High	High
AAS97698.1	3228	chemotaxis protein CheY	24.041	21	3	13	3	126	14.4	5.11	24.28	3	0	2.063	2.142	1.025	0.148463	0.566945	0.998377	46.16	62.64	16.49	691243	1.42623e+06	2.61074e+06	81.17	6.69	17.99	Peak Found	High	High	High	High	High	High	High	High
AAS95936.1	1458	chemotaxis protein CheZ, putative	44.283	40	8	34	8	248	27.2	4.79	33.06	8	0	0.783	1.288	1.275	0.7061	0.958923	0.980264	59.99	84.4	36.26	3.52666e+06	2.4877e+06	4.86939e+06	5.77	8.11	31.45	High	High	High	High	High	Not Found	High	High	High
AAS96549.1	2076	chemotaxis protein methyltransferase	94.806	47	14	188	14	292	34	9.07	340.09	14	0	1.034	0.848	0.756	0.942506	0.937226	0.843364	49.26	43.19	55.68	4.11434e+07	4.37332e+07	3.3616e+07	13.17	8.38	12.06	High	High	High	High	High	High	High	High	High
AAS96073.1	1595	chemotaxis protein methyltransferase	16.18	11	3	10	3	291	33.9	9.64	10.43	3	0	0.705	0.764	0.901	0.695868	0.93275	0.984176	36.23	24.38	24.83	1.16276e+06	655216	920782	11.99	16.6	9.42	High	High	Not Found	High	High	Not Found	High	High	High
AAS96702.1	2229	chemotaxis protein MotA	56.269	24	7	46	7	253	27.3	9.45	76.72	7	0	1.177	1.047	0.807	0.753331	0.993965	0.896116	33.07	45.88	59.57	5.89169e+06	7.55578e+06	5.78511e+06	15.74	12.8	20.34	High	High	High	High	High	High	High	High	High
AAS94534.1	50	chemotaxis protein MotA	9.753	8	2	10	2	252	27.3	5.85	15.51	2	0	1.548	1.151	0.814	0.575863	0.993965	0.964272	37.56	53.83	24.67	701629	1.12708e+06	862396	84.83	12.17	10.03	High	High	High	High	Peak Found	Not Found	High	High	High
AAS97080.1	2608	chemotaxis protein MotA	32.266	25	5	32	5	281	30.4	6.46	36.59	5	0	0.889	0.846	0.945	0.914489	0.951685	0.976855	28.97	43.09	38.51	4.4414e+06	3.39806e+06	3.15355e+06	6.74	12.49	11.11	High	High	High	High	High	High	High	High	High
AAS95121.1	640	chemotaxis protein PomA	16.011	18	4	9	4	250	27.1	6.58	6.56	4	0	1.576	1.616	1.225	0.600391	0.885423	0.974669	68.85	62.4	38.92	544467	1.04921e+06	1.3454e+06	22.56	11.16	9	Peak Found	High	Peak Found	High	Peak Found	Peak Found	High	High	High
AAS95120.1	639	chemotaxis protein PomB	39.769	46	8	27	8	257	28.2	5.26	30.12	8	0	1.333	0.99	0.846	0.7061	0.993965	0.961158	50.86	44.95	48.9	1.78338e+06	2.05693e+06	2.26291e+06	13.41	4.91	9.39	High	High	High	High	High	Peak Found	High	High	High
AAS94934.1	451	chloride channel family protein	20.669	14	5	10	5	603	64.6	6.61	3.5	5	0	0.707	1.386	3.253	0.794001	0.953611	0.292792	45.81	99.06	95.6	521430	284262	730215	109.47	21.06	16.13	Peak Found	High	Peak Found	Peak Found	High	Not Found	High	High	High
AAS94945.1	462	chorismate mutase/prephenate dehydratase	92.034	37	12	109	11	391	42.9	5.83	192.06	12	0	0.65	1.271	1.734	0.187705	0.964364	0.796345	78.67	51.66	66.22	2.01091e+07	1.95682e+07	2.66218e+07	10.66	13.69	29	High	High	High	High	High	High	High	High	High
AAS95374.1	894	chorismate synthase	52.358	36	8	58	8	354	37.2	6.06	111.39	8	0	0.947	0.713	0.707	0.971674	0.817705	0.796345	63.29	72.14	76.5	6.30917e+06	7.93134e+06	6.25429e+06	31.9	10.25	23.74	High	High	High	High	High	High	High	High	High
AAS94485.1	1	chromosomal replication initiator protein DnaA	33.636	17	6	16	6	437	49.5	7.8	31.58	6	0	1.089	2.65	0.977	0.957487	0.331751	0.997949	41.91	98.03	39.05	1.02351e+06	781492	1.74363e+06	12.47	133.82	8.36	High	High	High	Peak Found	High	High	High	High	High
AAS95536.1	1056	cobalt ABC transporter, ATP-binding protein, putative	11.995	15	3	11	3	273	29.6	6.51	5.48	3	0	0.384	0.378	2.324	0.00844611	0.223376	0.495158	117.23	124.07	146.29	1.92606e+06	1.32987e+06	1.62029e+06	28.02	30.85	71.76	High	High	High	Peak Found	High	High	High	High	High
AAS94888.1	405	cobyrinic acid a,c-diamide synthase	40.927	18	7	28	7	468	50.2	6.05	23.59	7	0	1.18	0.72	0.584	0.870738	0.891747	0.747576	70.71	44.75	40.93	1.90738e+06	2.21326e+06	1.35176e+06	21.63	20.16	7.4	High	High	High	High	High	High	High	High	High
AAS97557.1	3086	cobyrinic acid a,c-diamide synthase	13.979	19	4	13	4	307	32.6	9.36	0	4	0	0.995	0.739	0.777	0.980422	0.921572	0.954743	48.44	39.56	61.96	527648	551845	381015	26.92	41.49	10.15	High	High	High	High	High	Peak Found	Peak Found	High	High
AAS95916.1	1438	cobyrinic acid a,c-diamide synthase family protein	83.265	46	14	104	14	354	38.6	6.19	156.52	14	0	0.887	0.782	0.952	0.927	0.893736	0.977501	47.09	50.48	67.31	1.93626e+07	2.11023e+07	1.36568e+07	11.83	22.42	12.93	High	High	High	High	High	High	High	High	High
AAS95190.1	710	competence protein comM, putative	3.676	7	2	5	2	554	58.2	7.53	0	2	0	0.887	0.711	0.77	0.957487	0.895452	0.953073	15.91	26.77	28.43	126377	116627	129771	14.85	14.02	26.3	High	High	Peak Found	High	Peak Found	Not Found	Peak Found	High	High
AAS96313.1	1837	competence protein, putative	54.862	25	9	44	9	260	30.5	6.55	67.86	9	0	0.626	0.999	1.57	0.206274	0.993965	0.876979	44.07	30.48	38.72	4.48878e+06	1.9735e+06	4.82931e+06	4.26	6.93	12.99	High	High	High	High	High	High	High	High	High
AAS95429.1	949	conserved domain protein	89.706	47	12	116	12	253	27.5	7.72	204.37	12	0	0.847	0.092	0.119	0.844655	7.49363e-08	1.7104e-05	66.78	86.23	92.98	3.61485e+07	3.60355e+07	4.33909e+06	8.67	42.19	21.4	High	High	High	High	High	High	High	High	High
AAS97486.1	3015	conserved domain protein	15.399	19	3	13	3	188	21.6	7.17	21.93	3	0	1.87	0.909	0.152	0.224352	0.992001	0.003472	14.57	49.76	246.09	1.12154e+06	1.58636e+06	917582	16.03	18.1	11.3	High	High	Peak Found	High	High	High	High	High	Peak Found
AAS97488.1	3017	conserved domain protein	21.26	15	4	14	4	343	38	8.06	24.09	4	0	0.367	1.572	3.393	0.0142137	0.87042	0.150187	117.04	80.64	103.85	1.51847e+06	716299	1.59867e+06	57.5	42.18	82.17	High	High	High	High	High	Peak Found	High	Peak Found	High
AAS97417.1	2945	conserved domain protein	17.206	18	4	10	4	285	30.1	6.25	7.67	4	0	0.643	1.458	2.73	0.324995	0.895298	0.314122	54.15	47.19	68.24	4.61397e+06	174832	3.91681e+06	9.8	19.53	12.03	High	Peak Found	Peak Found	High	Peak Found	Not Found	High	High	High
AAS95888.1	1410	conserved domain protein	9.608	9	2	4	2	290	33.1	7.75	2.04	2	0	1.325	0.648	0.345	0.900092	0.846236	0.425093	73.5	71.52	55.59	283457	222109	160676	20.43	161.49	46.87	Peak Found	High	Peak Found	Peak Found	High	Peak Found	Peak Found	High	High
AAS95739.1	1261	conserved domain protein	11.219	5	3	6	3	586	64.9	8.63	4.28	3	0	1.629	0.754	0.407	0.590395	0.930904	0.482577	72.85	69.46	39.32	506927	754781	391497	3.06	2.56	26.28	Peak Found	High	High	Peak Found	High	High	Peak Found	High	Peak Found
AAS96799.1	2326	conserved domain protein	49.955	29	5	23	5	300	30.3	9.19	31.13	5	0	0.606	1.261	1.856	0.134673	0.964364	0.761085	52.33	76.89	133.13	5.21276e+06	3.70885e+06	4.52875e+06	9.7	49.86	28.53	High	High	Peak Found	High	High	High	High	High	High
AAS94484.1	A0145	conserved domain protein	132.396	25	24	93	24	1308	139.7	5.9	62.28	24	0	1.059	1.487	1.521	0.93198	0.895298	0.896116	67.68	58.97	73.67	6.51241e+06	6.72823e+06	9.48137e+06	3.4	22.12	9.13	High	High	High	High	High	High	High	High	High
AAS97110.1	2638	conserved domain protein	7.938	7	2	7	2	362	37.8	8.21	0	2	0	0.755	0.965	1.533	0.837409	0.993965	0.930043	53.04	30.02	19.6	286023	250166	316167	30.89	13.47	10.1	High	High	Peak Found	High	Peak Found	Not Found	High	High	High
AAS97141.1	2669	conserved domain protein	16.904	68	4	17	4	78	8.8	4.6	4.13	4	0	0.917	0.688	0.764	0.953718	0.885024	0.943933	48.83	95.06	101.94	1.20436e+06	937333	731126	12.77	5.92	66.52	High	High	High	High	High	Peak Found	Peak Found	High	High
AAS95041.1	560	conserved domain protein	7.42	9	2	6	2	193	23	7.46	8.48	2	0	3.225	2.236	0.746	0.0203301	0.690814	0.950061	54.85	54.85	27.41	699730	435615	302068	23.77	21.91	20.6	Peak Found	Peak Found	High	High	High	Not Found	Peak Found	High	High
AAS97838.1	3369	conserved domain protein	24.889	26	6	26	6	262	28.8	8.53	24.65	6	0	1.008	0.773	0.861	0.987503	0.915515	0.953073	44.14	44.65	78.82	2.85987e+06	3.09539e+06	1.75051e+06	3.66	12	14.11	High	High	High	High	High	High	High	High	High
AAS94385.1	A0070	conserved domain protein	40.837	18	10	36	10	643	72.2	6.18	46.13	10	0	0.86	0.809	0.936	0.863599	0.930904	0.980264	67.44	81.16	63.15	4.66572e+06	2.69257e+06	2.94114e+06	39.36	24.3	22.64	High	High	High	High	High	High	High	High	High
AAS95387.1	907	conserved domain protein	119.814	32	19	128	19	979	109.7	9.85	157.63	19	0	0.937	1.245	1.244	0.971674	0.968524	0.984176	62.95	52.79	55.13	1.10335e+07	9.2716e+06	1.21347e+07	12.55	1.12	10.82	High	High	High	High	High	High	High	High	High
AAS97259.1	2787	conserved domain protein	28.14	38	5	38	5	152	16.1	8.97	41.75	5	0	1.131	1.183	1.047	0.870738	0.992001	0.997848	47.94	59.21	45.83	3.49411e+06	3.85677e+06	3.59656e+06	31.88	31.88	27.92	High	High	High	High	High	High	High	High	High
AAS95553.1	1073	conserved domain protein	27.938	31	6	12	6	308	32.3	9.74	15.95	6	0	0.764	0.882	0.976	0.763359	0.971272	0.997949	51.85	52.32	58.86	1.17295e+06	1.99256e+06	1.03459e+06	21.23	70.54	12.68	High	High	High	High	High	Not Found	High	High	High
AAS96461.1	1985	conserved domain protein	86.254	24	10	99	10	418	47.9	5.73	163.26	10	0	1.043	0.982	1.069	0.934949	0.993965	0.99805	45.29	54.79	57.19	1.47692e+07	1.69281e+07	1.6691e+07	14.39	11.22	12.78	High	High	High	High	High	High	High	High	High
AAS97635.1	3165	conserved domain protein	13.286	15	4	8	4	286	31.8	6.13	14.88	4	0	0.891	0.825	1.027	0.936868	0.956732	0.999667	19.21	30.94	21.65	1.78031e+06	1.18644e+06	1.43774e+06	6.74	51.7	10.71	High	High	High	Peak Found	High	Peak Found	Peak Found	High	High
AAS94505.1	21	conserved domain protein	23.943	14	4	18	4	348	40.1	6.42	22.53	4	0	0.916	1.143	1.01	0.947229	0.993965	0.999667	43.8	54.42	41.76	2.03169e+06	1.58415e+06	1.5676e+06	24.01	39.4	17.62	High	High	High	High	High	High	High	High	High
AAS97473.1	3002	conserved domain protein	29.004	29	7	24	7	382	42.5	5.59	5.52	7	0	0.986	1.155	1.077	0.984949	0.993965	0.999667	104.1	104.8	36.46	1.776e+06	1.62705e+06	3.58028e+06	28.68	3.32	53.38	High	High	High	High	Peak Found	Peak Found	High	High	High
AAS94338.1	A0126	conserved hypothetical protein	16.05	20	2	15	2	155	16.5	4.3	15.85	2	0	0.42	1.758	6.481	0.0119835	0.754122	0.00209656	98.94	40.75	138.95	2.04357e+06	1.71632e+06	3.77587e+06	40.67	38.54	31.76	High	High	High	Peak Found	High	High	High	High	High
AAS96909.1	2436	conserved hypothetical protein	11.122	13	3	10	3	210	23.9	6.01	8.2	3	0	1.475	0.621	0.155	0.523044	0.823502	0.00349086	55.48	69.4	118.57	1.17249e+06	2.79014e+06	514119	22.26	16.6	28.39	Peak Found	High	High	High	High	Not Found	High	High	High
AAS94452.1	A0147	conserved hypothetical protein	25.674	24	6	17	6	413	44.9	5.69	2.07	6	0	1.254	4.476	4.383	0.918347	0.0844945	0.0718388	49.79	41.18	53.47	176962	121428	1.1082e+06	10.07	16.63	22.45	High	Peak Found	Peak Found	High	Peak Found	Peak Found	High	High	High
AAS96871.1	2398	conserved hypothetical protein	20.517	20	3	19	3	163	18	5.2	40.43	3	0	1.225	0.342	0.266	0.832815	0.208456	0.0826494	37.33	70.45	52.99	1.80136e+06	2.22711e+06	550345	14.44	14.4	51.09	High	High	High	High	High	High	High	High	High
AAS96893.1	2420	conserved hypothetical protein	11.22	22	2	18	2	109	12.4	4.98	29.87	2	0	1.443	0.653	0.337	0.358082	0.793085	0.102232	73.08	33.46	77.45	2.6441e+06	3.84805e+06	1.82789e+06	54.82	14.99	13.37	High	High	High	High	High	High	High	High	High
AAS95688.1	1210	conserved hypothetical protein	14.965	35	4	8	4	178	19.3	4.64	10.45	4	0	1.37	4.156	3.523	0.832815	0.0769947	0.129289	70.81	72.75	84.32	400715	575125	1.87693e+06	37.07	24.95	18.7	Peak Found	Peak Found	High	High	Peak Found	Not Found	High	High	High
AAS95701.1	1223	conserved hypothetical protein	46.961	25	10	40	10	522	56.8	5.19	40.49	10	0	1.196	0.475	0.395	0.753331	0.366259	0.156471	50.5	51.47	45.82	5.28923e+06	6.21948e+06	1.97241e+06	4.67	27.45	23.97	High	High	High	High	High	High	High	High	High
AAS96685.1	2212	conserved hypothetical protein	16.906	31	4	8	4	120	13.2	5.99	13.12	4	0	0.891	3.519	3.21	0.948239	0.238789	0.24209	101.34	76.59	131.87	390147	936556	739562	19.19	11.84	20.06	Peak Found	High	Peak Found	Peak Found	Peak Found	High	High	High	High
AAS94840.1	357	conserved hypothetical protein	6.354	10	2	9	2	305	34	6.52	14.26	2	0	0.711	0.241	0.338	0.703983	0.064211	0.274315	24.39	68.22	57.46	1.3266e+06	943747	319213	8.28	27.72	57.36	High	High	High	High	High	Not Found	High	High	High
AAS97503.1	3032	conserved hypothetical protein	77.803	42	10	77	10	209	22.6	5.21	103.71	10	0	1.812	4.959	2.609	0.0264454	0.00415895	0.337365	30.89	67.95	44.47	3.589e+06	5.59622e+06	1.54989e+07	39.16	60.43	23.27	High	High	High	High	High	High	High	High	High
AAS96147.1	1670	conserved hypothetical protein	39.513	54	9	38	9	212	22.6	5.24	26.68	9	0	0.575	1.438	2.62	0.11625	0.90225	0.345471	46.91	51.64	58.33	3.56577e+06	1.57899e+06	5.03237e+06	20.72	12.39	45.35	High	High	High	High	High	High	High	High	High
AAS95279.1	799	conserved hypothetical protein	35.264	19	6	36	6	466	50.5	4.59	38.78	6	0	0.622	2.117	2.578	0.307563	0.4646	0.362233	55.18	62.96	41.51	2.68342e+06	1.64045e+06	5.85634e+06	18.35	26.91	13.61	High	High	High	High	High	High	High	High	High
AAS96027.1	1549	conserved hypothetical protein	18.028	21	4	15	4	250	27.9	4.94	11.59	4	0	0.837	0.36	0.386	0.867617	0.223376	0.362283	62.58	40.67	56.35	2.01838e+06	1.52455e+06	603861	18.91	24.81	4.6	High	High	High	High	High	High	High	High	High
AAS96706.1	2233	conserved hypothetical protein	9.622	8	2	7	2	325	35.8	7.03	11.49	2	0	1.118	0.437	0.359	0.96948	0.547173	0.397368	30.07	98.65	96.34	483045	529440	460727	4.83	21.87	31.55	High	High	Peak Found	High	Peak Found	Not Found	High	High	High
AAS97410.1	2938	conserved hypothetical protein	96.975	52	17	103	17	390	42.8	8.03	141.6	17	0	0.904	2.382	2.404	0.942916	0.330525	0.42432	67.46	57.31	56.1	9.73511e+06	8.49019e+06	1.83328e+07	24.82	19	13.46	High	High	High	High	High	High	High	High	High
AAS95552.1	1072	conserved hypothetical protein	23.941	32	6	23	6	220	23.1	8.6	10.16	6	0	1.044	0.404	0.5	0.953718	0.203587	0.424731	55.49	63.31	40.06	4.32485e+06	4.66474e+06	1.79398e+06	5.46	9.88	37.73	High	High	High	High	High	High	Peak Found	High	High
AAS97370.1	2898	conserved hypothetical protein	15.672	8	2	9	2	333	36.4	5.17	16.91	2	0	1.539	0.676	0.414	0.539852	0.870104	0.438207	33.86	21.06	33.09	1.00882e+06	1.51549e+06	593960	11.6	40.37	12.03	High	High	High	High	Peak Found	High	High	High	Peak Found
AAS95933.1	1455	conserved hypothetical protein	75.779	49	12	63	12	247	28.6	5.57	89.55	12	0	1.283	3.407	2.358	0.572025	0.0602556	0.451699	98.35	65.47	57.89	4.13321e+06	8.26893e+06	1.46767e+07	34.65	16.7	9.07	High	High	High	High	High	High	High	High	High
AAS96293.1	1816	conserved hypothetical protein	52.726	27	9	44	9	373	39	6.87	68.1	9	0	0.796	1.784	2.293	0.71342	0.706387	0.488477	102.43	59.04	102.63	4.21063e+06	1.15102e+07	6.73518e+06	42.25	16.35	13.08	High	High	High	High	High	High	High	High	High
AAS96462.1	1986	conserved hypothetical protein	23.372	48	6	24	6	143	15.3	7.46	19.62	6	0	0.32	0.709	2.247	0.000592019	0.866559	0.525961	64.31	62.64	34.03	2.58659e+06	905774	1.5311e+06	48.8	68.36	1.88	High	High	High	High	High	High	High	High	High
AAS94759.1	276	conserved hypothetical protein	19.285	39	4	16	4	132	14.2	7.08	6.55	4	0	1.202	2.867	2.188	0.929563	0.351314	0.56923	86.12	53.71	98.8	500155	743097	1.54861e+06	29.41	86.43	13.76	High	High	Peak Found	Peak Found	High	Peak Found	High	High	High
AAS96298.1	1821	conserved hypothetical protein	15.973	16	3	8	3	251	26.3	6.1	10.09	3	0	2.067	1.688	0.619	0.00429488	0.802676	0.675836	79.3	53.3	19.98	2.59875e+06	4.80646e+06	3.18451e+06	87.14	18.42	11.04	Peak Found	High	High	Peak Found	High	Not Found	High	High	High
AAS96367.1	1891	conserved hypothetical protein	24.973	21	4	19	4	253	29.1	5.81	31.54	4	0	0.853	1.304	1.968	0.915461	0.956732	0.677894	53	58.24	70.76	1.25223e+06	933239	2.13788e+06	73.6	24.62	28.86	High	High	High	High	High	Peak Found	High	High	High
AAS94566.1	82	conserved hypothetical protein	35.216	15	7	38	7	530	58.2	7.4	41.45	7	0	1.353	0.896	0.62	0.489913	0.966741	0.68287	68.63	63.9	46.51	4.58417e+06	4.13767e+06	2.96865e+06	28.94	15.47	17.55	High	High	High	High	High	High	High	High	High
AAS95463.1	983	conserved hypothetical protein	13.89	17	3	9	3	181	20.1	4.83	5.98	3	0	0.828	1.12	2.048	0.90199	0.993965	0.708187	39.39	114.8	47.74	630877	346801	825772	92.86	90.52	11.39	High	High	High	High	High	Peak Found	High	Peak Found	High
AAS95122.1	641	conserved hypothetical protein	23.11	16	6	15	6	382	41	7.18	17.09	6	0	0.8	1.415	1.977	0.869236	0.940685	0.717654	51.45	85.81	58.29	808772	595252	1.27683e+06	30.48	24.65	23.07	High	Peak Found	High	High	High	Peak Found	High	High	High
AAS95926.1	1448	conserved hypothetical protein	59.806	39	12	64	12	378	41.2	7.03	59.83	12	0	0.887	0.624	0.664	0.927	0.668519	0.740662	58.12	56.31	63.07	1.05229e+07	8.95147e+06	5.3628e+06	2.39	8.87	21.91	High	High	High	High	High	High	High	High	High
AAS96376.1	1900	conserved hypothetical protein	53.788	39	10	47	10	313	32.9	5.29	51.9	10	0	0.944	2.083	1.899	0.962046	0.481398	0.744593	89.64	69.42	86.16	4.21387e+06	3.69218e+06	6.0998e+06	4.45	19.77	15.35	High	High	Peak Found	High	High	High	High	High	High
AAS97241.1	2769	conserved hypothetical protein	32.634	23	5	45	5	260	28.4	6.57	57.97	5	0	1.121	0.894	0.678	0.814027	0.964089	0.762056	46.69	47.93	55.41	9.61321e+06	9.42192e+06	5.99553e+06	20.88	30.02	32.34	High	High	High	High	High	High	High	High	High
AAS96424.1	1948	conserved hypothetical protein	17.717	47	4	14	4	96	11.2	6.77	6.3	4	0	0.833	0.772	0.582	0.875868	0.938238	0.762056	92.25	91.33	58.61	1.0901e+06	1.57619e+06	697623	27.95	45.95	55.73	High	High	High	High	High	High	High	High	High
AAS96128.1	1651	conserved hypothetical protein	34.828	33	7	45	7	123	14.1	9.92	70.71	7	0	1.051	1.731	1.798	0.925436	0.740049	0.763948	42.97	60.94	42.81	9.41477e+06	1.10563e+07	1.53296e+07	22.44	20.09	35.3	High	High	High	High	High	High	High	High	High
AAS95112.1	631	conserved hypothetical protein	86.396	35	16	89	16	521	55.7	6.83	77.31	16	0	1.009	0.954	0.679	0.959112	0.992001	0.763948	65.87	72.5	66.68	9.20182e+06	9.44042e+06	5.71376e+06	33.09	11.24	8.29	High	High	High	High	High	High	High	High	High
AAS97364.1	2892	conserved hypothetical protein	12.464	21	4	17	4	266	30.1	5.82	21.41	4	0	0.388	0.743	1.753	0.015589	0.91853	0.7713	74.07	42.59	73.17	1.50825e+06	1.19544e+06	1.05447e+06	6.97	30.4	23.74	High	High	High	High	High	High	High	High	High
AAS95264.1	784	conserved hypothetical protein	12.891	34	3	13	3	115	12	4.92	16.51	3	0	2.102	4.145	1.77	0.366916	0.153141	0.793213	44.27	53.08	40.63	194581	528724	869050	40.62	9.81	21.1	Peak Found	High	Peak Found	High	High	Not Found	High	High	High
AAS97369.1	2897	conserved hypothetical protein	46.28	32	6	25	6	329	34.1	6.71	35.78	6	0	1.326	2.272	1.699	0.832815	0.585982	0.796345	119.01	53.16	92.35	532400	873580	1.48883e+06	17.61	11.9	43.9	High	High	Peak Found	High	High	Peak Found	High	High	High
AAS96944.1	2472	conserved hypothetical protein	71.438	18	10	70	10	779	86.2	6.3	76.8	10	0	0.98	0.737	0.719	0.988116	0.845157	0.812714	56.3	39.46	51.84	7.26322e+06	7.64859e+06	5.0253e+06	10.93	19.55	25.97	High	High	High	High	High	High	High	High	High
AAS95118.1	637	conserved hypothetical protein	100.232	39	13	66	13	462	50	6.84	98.28	13	0	0.947	1.851	1.69	0.966597	0.667182	0.821751	57.28	94.97	99.38	3.73055e+06	4.20051e+06	8.19144e+06	89.73	11.28	34.36	High	High	High	High	High	High	High	High	High
AAS94983.1	501	conserved hypothetical protein	63.855	42	10	63	10	273	30.1	4.92	69.22	10	0	0.988	2.108	1.672	0.999866	0.457185	0.836097	77.58	44.04	46.46	3.54782e+06	4.44107e+06	7.2168e+06	10.52	8.09	13.64	High	High	Peak Found	High	High	High	High	High	High
AAS95004.1	522	conserved hypothetical protein	8.186	13	2	7	2	173	19.2	6.55	9.91	2	0	1.558	1.535	0.599	0.766435	0.953611	0.850842	60.55	74.25	56.6	255100	213330	315657	41.15	11.17	42.19	Peak Found	High	Peak Found	Peak Found	High	Not Found	High	High	High
AAS94732.1	249	conserved hypothetical protein	13.31	14	4	10	4	323	35.1	7.53	4.48	4	0	1.164	0.653	0.623	0.938474	0.866559	0.850842	18.21	48.64	23.86	698941	563065	408936	15.66	22.87	8.86	High	High	Peak Found	Peak Found	High	Peak Found	High	High	High
AAS94521.1	37	conserved hypothetical protein	15.907	37	4	21	4	138	14.5	5.25	16.64	4	0	1.111	0.719	0.706	0.935944	0.885756	0.865574	34.86	72.22	68.55	2.11245e+06	2.27867e+06	1.58392e+06	18.34	18.4	42.27	High	High	Peak Found	High	High	High	High	High	High
AAS97243.1	2771	conserved hypothetical protein	44.126	45	9	54	9	321	34.4	7.34	61.88	9	0	0.672	1.044	1.583	0.321696	0.993965	0.86563	52.21	77.78	60.48	7.09556e+06	5.9389e+06	6.83985e+06	42.22	4.89	11.67	High	High	High	High	High	High	High	High	High
AAS96494.1	2019	conserved hypothetical protein	47.187	19	11	31	11	689	78.4	5.88	32.94	11	0	0.473	1.747	1.548	0.00389244	0.754122	0.896116	108.52	63.35	91.12	2.76828e+06	7.82658e+06	3.37952e+06	112.06	3.92	7.18	High	High	High	Peak Found	High	Not Found	High	High	High
AAS96679.1	2206	conserved hypothetical protein	21.875	21	4	19	4	223	24.8	6.07	25.15	4	0	0.779	0.776	0.803	0.671388	0.895298	0.901583	99.12	68.16	134.05	5.44089e+06	2.4005e+06	3.7298e+06	13.98	52.83	11.23	High	High	High	High	High	High	High	Peak Found	High
AAS95034.1	552	conserved hypothetical protein	25.223	15	5	22	5	321	35.7	9.01	26.85	5	0	0.772	1.052	1.429	0.791465	0.996375	0.905221	39.45	40.79	39.79	1.78843e+06	1.21831e+06	1.96075e+06	12.38	9.85	27.23	High	High	High	High	High	Not Found	High	High	High
AAS96225.1	1748	conserved hypothetical protein	64.014	25	12	57	12	590	66.2	5.2	64.88	12	0	0.856	0.786	0.835	0.874109	0.897678	0.905221	45.37	47.69	41.31	7.58977e+06	5.26488e+06	4.79646e+06	83.27	19.68	9.04	High	High	High	High	High	High	High	High	High
AAS95318.1	838	conserved hypothetical protein	22.717	58	4	51	4	77	8.5	8.44	52.56	4	0	1.008	0.722	0.822	0.959112	0.819244	0.905221	58.15	87.43	78.43	1.16011e+07	1.16481e+07	9.52673e+06	10.56	32.05	24	High	High	High	High	High	High	High	High	High
AAS96109.1	1631	conserved hypothetical protein	47.693	33	8	48	8	303	34.2	6.19	82.28	8	0	1.031	0.846	0.825	0.948239	0.938238	0.908226	41.23	33.92	21.49	7.55758e+06	7.37072e+06	5.89651e+06	31.15	17.97	11.09	High	High	High	High	High	High	High	High	High
AAS94670.1	186	conserved hypothetical protein	46.919	43	10	44	10	259	29.1	6.86	38.83	10	0	1.688	1.601	0.844	0.08386	0.833416	0.910641	77.74	86.26	71.62	2.27975e+06	5.02153e+06	4.31333e+06	32.75	9.04	53.93	High	High	Peak Found	High	High	High	High	High	High
AAS97309.1	2837	conserved hypothetical protein	75.811	47	14	73	14	357	40.8	5.63	70.02	14	0	0.686	1.043	1.481	0.297591	0.993965	0.910685	51.32	60.52	54.81	1.5322e+07	9.79098e+06	1.43555e+07	35.35	21.34	17.44	High	High	High	High	High	High	High	High	High
AAS94429.1	A0021	conserved hypothetical protein	34.006	25	8	32	8	353	38.5	5.76	24.32	8	0	1.236	0.977	0.806	0.777515	0.993965	0.910685	49.23	78.6	33.63	2.19759e+06	3.20871e+06	2.15458e+06	35.83	18.19	26.46	High	High	High	High	High	High	High	High	High
AAS96778.1	2305	conserved hypothetical protein	46.925	41	8	47	8	209	23.7	5.27	57.43	8	0	1.11	1.766	1.481	0.866809	0.723643	0.910685	66.3	66.82	69.4	5.58426e+06	7.7556e+06	1.05162e+07	12.39	14.04	24.7	High	High	High	High	High	High	High	High	High
AAS94977.1	495	conserved hypothetical protein	46.385	28	10	54	10	398	43.3	7.64	53.93	10	0	1.258	1.047	0.85	0.62499	0.993965	0.915503	57.39	47.23	36.4	4.78351e+06	4.47458e+06	5.07168e+06	49.75	21.63	16.52	High	High	High	High	High	High	High	High	High
AAS97455.1	2984	conserved hypothetical protein	62.475	47	13	68	13	335	35.6	5.76	85.78	13	0	0.806	0.652	0.837	0.746539	0.722096	0.91925	44.46	47.66	44.51	9.25608e+06	6.8662e+06	6.60917e+06	19.9	22.52	23.01	High	High	High	High	High	High	High	High	High
AAS95205.1	725	conserved hypothetical protein	80.282	32	16	72	16	715	77.7	5.94	67.12	16	0	0.962	0.774	0.827	0.971674	0.901395	0.921499	40.74	53.63	45.58	3.1599e+06	3.49741e+06	2.53998e+06	13.5	26.7	22.23	High	High	High	High	High	High	High	High	High
AAS95501.1	1021	conserved hypothetical protein	59.882	32	9	57	9	388	42.2	5.44	75.38	9	0	1.307	1.833	1.442	0.528152	0.704627	0.925947	39.68	35.35	43.83	5.18759e+06	7.2894e+06	8.26765e+06	39.82	10.65	19.76	High	High	High	High	High	High	High	High	High
AAS96323.1	1847	conserved hypothetical protein	26.617	23	5	23	5	297	30.9	6.06	27.23	5	0	0.931	1.714	1.429	0.953873	0.793908	0.926726	61.02	42.61	83.3	1.72468e+06	2.03782e+06	3.18995e+06	10.49	20.94	21.59	High	High	High	High	High	High	High	High	High
AAS95957.1	1479	conserved hypothetical protein	15.791	16	5	9	5	335	38.5	7.44	5.87	5	0	0.902	0.732	0.75	0.932055	0.866559	0.930043	81.38	75.32	55.5	5.1069e+06	1.14482e+06	966647	22.52	15.92	12.16	High	High	Peak Found	High	High	Peak Found	High	High	High
AAS95571.1	1091	conserved hypothetical protein	33.247	28	10	26	10	368	41.2	8.27	10.77	10	0	0.97	0.758	0.821	0.971674	0.911883	0.949735	57.42	63.32	80.54	2.57538e+06	2.70276e+06	1.56752e+06	30.23	8.66	15.49	High	High	High	High	High	High	High	High	High
AAS95759.1	1281	conserved hypothetical protein	51.289	39	11	48	11	300	32.9	7.44	79.77	11	0	0.91	0.98	0.884	0.948239	0.993965	0.950193	43.78	57.02	49.02	7.32306e+06	6.9259e+06	6.1533e+06	8.66	17.82	6.76	High	High	High	High	High	High	High	High	High
AAS97562.1	3091	conserved hypothetical protein	33.073	26	8	31	8	448	46.9	7.53	16.69	8	0	0.938	0.751	0.867	0.957487	0.887244	0.950814	47.87	47.48	59.25	4.01993e+06	2.68093e+06	2.79269e+06	28.54	4.5	10.81	High	High	High	High	High	High	High	High	High
AAS95152.1	671	conserved hypothetical protein	240.475	70	36	314	36	545	59.1	6.86	539.89	36	0	0.937	1.278	1.373	0.971674	0.964364	0.953073	57.74	62.38	55.35	4.7245e+07	4.65937e+07	5.85703e+07	26.61	23.82	15.6	High	High	High	High	High	High	High	High	High
AAS96499.1	2024	conserved hypothetical protein	18.481	18	5	15	5	354	39.5	5.63	8.51	5	0	1.226	0.955	0.804	0.866809	0.993965	0.953885	68.44	51.64	82.97	1.16037e+06	1.6968e+06	1.03613e+06	18.26	8.96	28.85	High	High	High	High	High	Not Found	High	High	High
AAS94711.1	227	conserved hypothetical protein	16.615	16	3	27	3	176	20.4	5.01	37.29	3	0	0.919	1.225	1.346	0.95033	0.986041	0.954743	57.8	63.38	42.76	2.62354e+06	2.08917e+06	2.95987e+06	23.01	5.2	39.44	High	High	High	High	High	High	High	High	High
AAS96880.1	2407	conserved hypothetical protein	11.583	14	2	8	2	166	18.2	9.51	15.14	2	0	0.669	0.621	0.814	0.572025	0.794985	0.964121	33.3	55.04	29.37	1.55591e+06	1.35789e+06	1.27162e+06	34.61	19.66	12.71	Peak Found	High	Peak Found	Peak Found	Peak Found	High	High	High	High
AAS96682.1	2209	conserved hypothetical protein	14.627	19	4	14	4	240	27.5	7.33	14.54	4	0	0.755	0.775	0.809	0.784292	0.937226	0.964272	51.58	40.26	41.79	1.05276e+06	810440	989895	28.47	25.28	11.76	High	High	High	High	High	Peak Found	High	High	High
AAS95455.1	975	conserved hypothetical protein	26.214	34	4	16	4	186	21	7.66	21.36	4	0	0.694	0.604	0.821	0.665203	0.797978	0.969065	42.95	46.88	80.98	1.22117e+06	905132	649751	11.76	6.89	35.45	High	High	Peak Found	High	Peak Found	Not Found	High	High	High
AAS96591.1	2118	conserved hypothetical protein	24.584	27	5	30	5	272	28.8	9.69	18.92	5	0	1.348	1.067	0.863	0.665203	0.993965	0.969383	31.99	40.59	43.61	1.89369e+06	2.29238e+06	1.92342e+06	36.64	26.64	26.11	High	High	High	High	High	High	High	High	High
AAS94346.1	A0116	conserved hypothetical protein	31.221	58	4	12	4	121	12.9	4.7	8.98	4	0	2.023	3.507	1.241	0.278184	0.189429	0.972027	52.7	45.11	46.94	453692	839224	1.36016e+06	70.16	25.46	53.23	Peak Found	High	Peak Found	High	Peak Found	High	Peak Found	High	High
AAS96185.1	1708	conserved hypothetical protein	11.642	11	3	5	3	337	38.9	6.55	4.03	3	0	0.604	1.125	1.361	0.62402	0.999187	0.972027	42.73	29.88	55.27	281080	229125	279285	23.82	4.81	12.75	High	High	Peak Found	High	Peak Found	Not Found	Peak Found	Peak Found	High
AAS97447.1	2976	conserved hypothetical protein	82.442	39	14	71	14	370	41.7	8.43	98.89	14	0	0.989	1.213	1.312	0.984707	0.992001	0.972027	37.72	45.37	53.59	6.30342e+06	6.14509e+06	8.56215e+06	10.54	20.71	25.08	High	High	High	High	High	High	High	High	High
AAS97039.1	2567	conserved hypothetical protein	19.566	27	4	16	4	234	25.5	6.65	7.9	4	0	0.468	0.58	1.265	0.194158	0.781613	0.974669	77.65	56.32	114.8	925012	447300	631802	9.62	133.28	32.64	High	High	High	High	High	Peak Found	High	High	High
AAS94619.1	135	conserved hypothetical protein	25.038	25	5	12	5	303	33.6	7.94	11.07	5	0	3.558	2.733	1.227	0.00029293	0.278764	0.976855	58.93	143.36	42.46	2.44157e+06	531400	1.03484e+06	17.56	32.38	20.18	High	High	Peak Found	High	Peak Found	Peak Found	High	High	High
AAS94923.1	440	conserved hypothetical protein	161.334	48	14	197	14	443	44.6	5.54	376.63	14	0	0.837	1.159	1.285	0.829076	0.993965	0.977896	74.59	56.29	66.05	1.95328e+07	1.85141e+07	2.85519e+07	31.16	13.9	13.94	High	High	High	High	High	High	High	High	High
AAS96530.1	2057	conserved hypothetical protein	42.152	20	9	29	9	487	52.9	6.01	22.27	9	0	1.108	1.085	0.98	0.914157	0.993965	0.980314	35.29	43.47	42.4	3.18266e+06	3.40431e+06	5.52235e+06	11.04	15.16	7.47	High	High	High	High	High	Peak Found	High	High	High
AAS95066.1	585	conserved hypothetical protein	39.465	13	8	21	8	797	85.4	5.58	17.62	8	0	1.124	1.315	1.212	0.938474	0.953611	0.98323	54.32	43.57	56.91	1.91262e+06	1.28707e+06	2.6887e+06	26.45	12.62	6.09	High	High	Peak Found	High	High	Peak Found	High	High	High
AAS95697.1	1219	conserved hypothetical protein	71.029	23	11	49	11	731	77.5	7.61	60.28	11	0	1.022	1.243	1.274	0.971674	0.966741	0.98323	47.17	44.11	44.33	4.39205e+06	3.99401e+06	4.50325e+06	25.73	30.3	8.54	High	High	High	High	High	High	High	High	High
AAS95722.1	1244	conserved hypothetical protein	42.317	69	8	45	8	148	15.6	5.29	76.78	8	0	1.002	1.644	1.257	0.971674	0.816266	0.98323	49.59	64.41	17.55	6.05515e+06	6.1894e+06	7.62828e+06	21.67	7.44	15.79	High	High	High	High	High	High	High	High	High
AAS95378.1	898	conserved hypothetical protein	75.907	35	12	55	12	293	33.3	4.92	72.39	12	0	0.78	0.841	0.984	0.665203	0.937226	0.984176	42.4	72.85	61.03	8.45135e+06	7.10189e+06	6.90258e+06	17.98	10	33.16	High	High	High	High	High	High	High	High	High
AAS96258.1	1781	conserved hypothetical protein	54.48	49	7	63	7	221	23.9	6.7	89.98	7	0	1.156	1.201	0.981	0.796369	0.992001	0.984176	43.79	68.62	43.49	6.63224e+06	6.44827e+06	6.65356e+06	14.44	3.69	38.81	High	High	Peak Found	Peak Found	High	Peak Found	High	High	High
AAS95441.1	961	conserved hypothetical protein	216.404	43	42	209	42	1354	144.1	6.58	277.92	42	0	1.114	1.27	0.998	0.824746	0.964364	0.984176	59.89	55.88	59.22	1.77012e+07	1.99529e+07	2.26978e+07	29.35	20.69	14.18	High	High	High	High	High	High	High	High	High
AAS97627.1	3157	conserved hypothetical protein	52.483	31	12	42	12	480	52.5	6.89	39	12	0	1.195	1.461	1.26	0.762834	0.901395	0.984268	49.47	43.09	44.8	5.02118e+06	6.12922e+06	4.35352e+06	13.59	16.27	1.49	High	High	High	High	High	High	High	High	High
AAS96457.1	1981	conserved hypothetical protein	10.733	13	2	6	2	163	18.6	7.97	10.35	2	0	0.871	0.842	0.982	0.883825	0.949453	0.987686	43.28	39.89	32.95	2.94329e+06	2.44875e+06	2.42588e+06	20.84	11.44	6.42	High	High	Peak Found	High	Peak Found	Not Found	High	High	High
AAS96989.1	2517	conserved hypothetical protein	28.474	14	5	20	5	413	47.2	6.07	42.8	5	0	0.885	0.806	0.99	0.91271	0.924507	0.990241	33.41	35.26	15.56	2.96467e+06	2.55484e+06	2.6352e+06	7.03	25.23	19.25	High	Peak Found	High	High	High	High	High	High	High
AAS97833.1	3364	conserved hypothetical protein	12.32	7	2	10	2	307	33.7	9.54	17.15	2	0	1.046	1.177	1.125	0.987503	0.993965	0.994465	44.87	31.27	24.4	576135	604336	692844	44.53	21.06	8.39	High	High	High	High	High	Not Found	High	High	High
AAS94627.1	143	conserved hypothetical protein	24.294	28	5	20	5	258	29.6	5.02	11.39	5	0	0.807	0.926	1.104	0.820173	0.992001	0.997848	26.32	43.73	30.41	2.24839e+06	1.39786e+06	1.8766e+06	4.28	23.18	20.97	High	High	Not Found	High	High	Peak Found	High	High	High
AAS97310.1	2838	conserved hypothetical protein	22.91	16	6	15	6	445	51.5	8.5	10.07	6	0	0.837	0.684	1.102	0.875868	0.870104	0.997848	62.1	39.89	36.19	1.68373e+06	1.19238e+06	910424	10.72	25.47	19.15	High	High	High	Peak Found	High	Peak Found	High	High	High
AAS96127.1	1650	conserved hypothetical protein	57.284	29	10	47	10	374	42.6	8.12	82.58	10	0	0.871	1.01	1.044	0.882562	0.993965	0.997848	42.58	46.91	44.2	6.23784e+06	5.4986e+06	6.08477e+06	49.8	38.43	0.97	High	High	High	High	High	High	High	High	High
AAS97026.1	2554	conserved hypothetical protein	7.507	12	2	7	2	294	34	4.92	1.98	2	0	0.879	0.756	0.923	0.942506	0.929307	0.997848	5.51	33.29	42.47	507407	326240	371443	5.43	17.72	18.73	High	Peak Found	Not Found	Peak Found	High	Not Found	High	High	High
AAS97227.1	2755	conserved hypothetical protein	5.316	12	2	5	2	280	29.5	5.24	0	2	0	2.716	2.101	1.091	0.190282	0.819244	0.997949	4.27	54.05	23.22	81588	317887	339055	43.98	32.97	10.99	Peak Found	High	Peak Found	High	Peak Found	Peak Found	Peak Found	High	High
AAS96889.1	2416	conserved hypothetical protein	7.056	25	2	9	2	160	18	5.36	1.97	2	0	1.88	1.902	0.97	0.528858	0.8244	0.997949	57.88	27.38	57.88	187187	448999	500364	51.28	32.85	43.4	Peak Found	High	High	High	High	High	High	High	High
AAS96550.1	2077	conserved hypothetical protein	209.309	43	30	295	30	642	69.8	4.69	486.95	30	0	0.752	0.983	1.152	0.564563	0.993965	0.997949	75.33	61.25	66.44	6.66647e+07	5.25658e+07	5.61585e+07	25.7	9.67	12.03	High	High	High	High	High	High	High	High	High
AAS94552.1	68	conserved hypothetical protein	37.521	26	8	18	8	511	54.9	5.97	16.31	8	0	1.234	1.092	0.978	0.82605	0.993965	0.997949	70.89	67.92	33.49	2.04332e+06	1.80026e+06	1.86727e+06	20.27	11.41	10.56	High	High	High	High	High	Not Found	High	High	High
AAS96497.1	2022	conserved hypothetical protein	15.951	5	4	7	4	1158	133.1	5.92	5.51	4	0	0.872	1.262	1.093	0.930281	0.982819	0.997949	65.92	59.71	40.72	533032	494294	643302	14.53	13.62	13.01	Peak Found	Peak Found	High	High	Peak Found	Not Found	High	High	High
AAS97502.1	3031	conserved hypothetical protein	44.261	32	9	47	9	363	39	7.06	61.92	9	0	0.895	0.967	1.055	0.938474	0.992001	0.997949	80.86	66.19	85.78	7.10056e+06	6.87661e+06	5.9335e+06	15.93	25.17	20.37	High	High	High	High	High	High	High	High	High
AAS96500.1	2025	conserved hypothetical protein	46.504	13	12	29	12	1183	134.2	5.88	30.29	12	0	0.913	1.052	1.166	0.940556	0.994465	0.997949	71.76	60.59	56.94	1.98046e+06	3.22762e+06	3.55685e+06	42.15	12.14	3.7	High	High	High	High	High	Peak Found	High	High	High
AAS96838.1	2365	conserved hypothetical protein	24.514	23	6	20	6	274	29.4	6.55	20.05	6	0	0.7	0.673	1.02	0.570384	0.819244	0.998377	57.05	57.59	81.69	2.40489e+06	1.85286e+06	1.9442e+06	21.2	7.19	57.71	High	High	High	Peak Found	High	High	High	High	High
AAS94575.1	91	conserved hypothetical protein	60.37	51	11	83	11	240	26.4	8.48	115.83	11	0	0.983	1.138	1.138	0.976581	0.993965	0.998377	46.2	39.9	48.31	1.10702e+07	8.84098e+06	1.07586e+07	8.03	24.8	13.5	High	High	High	High	High	High	High	High	High
AAS96611.1	2138	conserved hypothetical protein	96.649	68	16	114	16	217	24.1	7.59	196.12	16	0	0.949	1.243	1.14	0.980422	0.969212	0.998377	57.36	60.93	51.29	2.24469e+07	2.08233e+07	2.81366e+07	21.52	7.68	15.01	High	High	High	High	High	High	High	High	High
AAS95419.1	939	conserved hypothetical protein	9.815	10	2	14	2	249	28.6	8.62	13.82	2	0	1.465	1.748	1.081	0.485429	0.765972	0.999667	18.16	36.58	32.57	1.77277e+06	2.68089e+06	3.29213e+06	4.09	25.41	8.48	High	High	High	High	High	High	High	High	High
AAS97524.1	3053	conserved hypothetical protein	49.534	32	8	67	8	297	33	6.67	98.3	8	0	0.851	0.894	1.107	0.857045	0.960742	0.999667	55.13	49.61	40.09	1.13904e+07	1.00428e+07	1.05567e+07	27.9	20.36	8.59	High	High	High	High	High	High	High	High	High
AAS96781.1	2308	conserved hypothetical protein TIGR00022	15.973	22	3	23	3	163	17.9	6.19	13.74	3	0	1.277	0.366	0.271	0.638555	0.176889	0.0379394	42.88	66.54	75.03	3.25921e+06	3.83834e+06	1.12745e+06	10.08	21.1	26.25	High	High	High	High	High	High	High	High	High
AAS96162.1	1685	conserved hypothetical protein TIGR00046	24.537	26	4	10	4	249	27.4	6.3	17.59	4	0	0.384	0.624	1.377	0.000155038	0.721433	0.935383	114.96	63.27	75.22	5.69632e+06	738927	2.02498e+06	6.69	20.03	34.68	High	Peak Found	Peak Found	High	High	Not Found	High	High	High
AAS97669.1	3199	conserved hypothetical protein TIGR00103	31.085	48	6	22	6	103	11.1	6.76	24.3	6	0	2.459	1.805	0.873	0.000440242	0.727829	0.943933	91.4	86.33	65.27	1.12205e+06	4.71221e+06	2.84895e+06	31.25	55.64	53.19	High	High	High	High	High	High	High	High	High
AAS94642.1	158	conserved hypothetical protein TIGR00104	60.365	34	8	52	8	332	35.6	6.99	68.52	8	0	1.429	1.358	1.051	0.192388	0.938238	0.997949	44.16	65.07	63.53	1.22477e+07	1.93453e+07	5.12387e+06	80.15	6.3	24.62	High	High	High	High	High	High	High	High	High
AAS96388.1	1912	conserved hypothetical protein TIGR00150	11.43	20	3	12	3	162	17.3	4.79	13.32	3	0	0.931	0.517	0.358	0.960545	0.631048	0.31726	58.07	118.99	93.49	1.6021e+06	660396	645794	80.28	5.37	9.88	High	High	High	Peak Found	High	Not Found	High	High	High
AAS95758.1	1280	conserved hypothetical protein TIGR00159	28.209	27	6	20	6	248	27.5	9.38	23.1	6	0	0.897	1.155	1.047	0.942506	0.993965	0.999667	24.61	44.45	91.52	1.22685e+06	1.11993e+06	1.67926e+06	8.72	8.14	39.25	High	High	High	High	High	Peak Found	High	High	High
AAS97540.1	3069	conserved hypothetical protein TIGR00247	17.346	10	5	14	5	440	47.9	6.21	10.77	5	0	2.822	5.867	2.631	0.0704712	0.0145781	0.40697	31.87	89.8	50.77	317477	603483	1.23619e+06	21.32	11.92	18.69	High	Peak Found	High	High	High	High	High	High	High
AAS96707.1	2234	conserved hypothetical protein TIGR00275	17.337	14	4	12	4	389	41.7	7.53	11.99	4	0	1.107	0.687	0.657	0.95033	0.887244	0.86066	54.27	69.75	20.72	950658	1.10365e+06	618338	10.51	27.43	6.8	High	High	High	High	High	High	High	Peak Found	Peak Found
AAS97404.1	2932	conserved hypothetical protein TIGR01777	29.901	20	6	41	6	308	32.3	7.24	52.21	6	0	1.022	0.69	0.669	0.96948	0.817252	0.733255	53.77	57.48	57.99	4.86597e+06	5.04704e+06	3.36681e+06	15.8	15.54	25.44	High	High	High	High	High	High	High	High	High
AAS96797.1	2324	copper-translocating P-type ATPase	132.039	35	25	148	25	905	94	5.4	165.56	25	0	0.881	0.752	0.935	0.917006	0.860981	0.972027	74.22	71.62	90.43	2.6101e+07	2.15887e+07	2.31308e+07	5.25	39.35	8.39	High	High	High	High	High	High	High	High	High
AAS95054.1	573	creA protein	34.495	63	8	42	8	141	15.1	8.47	24.9	8	0	0.753	0.739	0.941	0.575863	0.858688	0.969155	49.02	46.73	64.44	5.01431e+06	4.75407e+06	4.03702e+06	0.84	10.94	13.34	High	High	High	High	High	High	High	High	High
AAS94334.1	A0131	CRISPR-associated protein, CT1133 family	32.272	17	8	33	8	612	68	7.43	11.44	8	0	1.041	1.014	1.107	0.971674	0.993965	0.997848	62.14	58.92	59.64	2.14853e+06	1.63571e+06	1.86912e+06	1.72	17.63	24.52	High	High	High	High	High	High	High	High	High
AAS94463.1	A0130	CRISPR-associated protein, CT1134 family	17.36	20	4	16	4	227	25.9	8.44	7.04	4	0	0.645	1.008	1.593	0.62852	0.996734	0.882493	47.54	55.59	32.42	768568	369048	623278	29.79	16.34	32.95	High	High	Peak Found	High	High	Not Found	High	High	High
AAS94333.1	A0132	CRISPR-associated protein, TM1801 family	91.646	41	11	106	11	290	32.3	7.52	124.72	11	0	0.916	1.329	1.376	0.953718	0.952428	0.953073	48.01	53.24	79.01	1.69527e+07	1.53764e+07	1.98353e+07	17.2	12.52	24.17	High	High	High	High	High	High	High	High	High
AAS96101.1	1623	CTP synthase	134.635	41	20	167	20	547	61	6.42	243.34	20	0	1.112	1.618	1.336	0.832428	0.817705	0.964272	49.02	53.5	55.51	3.13218e+07	3.84241e+07	4.42067e+07	12.46	62.59	14.68	High	High	High	High	High	High	High	High	High
AAS95145.1	664	cysteine desulfurase	69.367	31	10	51	10	394	42.4	7.02	84.16	10	0	0.713	2.387	2.583	0.443164	0.340908	0.347717	82.6	49.55	64.95	3.73881e+06	3.64319e+06	8.85311e+06	6.35	13.97	16.95	High	High	High	High	High	High	High	High	High
AAS95144.1	663	cysteine synthase A	33.153	20	6	20	6	308	31.9	5.25	36.18	6	0	0.926	0.865	0.889	0.953007	0.964364	0.974669	57.6	57.15	58.93	2.18329e+06	2.21323e+06	2.1307e+06	29.96	34.09	39.01	High	High	Not Found	High	High	High	High	High	High
AAS96260.1	1783	cysteine-rich domain protein	24.968	30	5	20	5	250	27.4	5.27	14.13	5	0	0.902	1.003	1.003	0.939208	0.993965	0.997949	46.25	55.86	59.77	2.02141e+06	2.16348e+06	2.4574e+06	24.66	15.86	22.02	High	Peak Found	High	High	High	High	High	High	High
AAS96057.1	1579	cysteinyl-tRNA synthetase	94.134	43	20	73	20	485	54.8	6	78.72	20	0	1.084	1.069	1.07	0.870738	0.996734	0.99805	52.79	61.12	62.37	8.62238e+06	9.07604e+06	8.49937e+06	0.28	12.3	20.79	High	High	High	High	High	High	High	High	High
AAS94834.1	351	cytidine 5'monophosphate N-acetylneuraminic acid synthetase, putative/polysaccharide biosynthesis protein	20.993	11	6	10	6	544	60.9	6.58	7.69	6	0	1.063	1.127	0.836	0.971674	0.993965	0.9746	98.81	50.68	52.5	860467	549884	738338	20.72	0.47	23	High	High	Peak Found	High	Peak Found	Not Found	High	High	High
AAS95508.1	1028	cytidylate kinase	29.018	34	7	15	7	232	24.9	6.24	12.12	7	0	1.103	0.788	0.661	0.953718	0.953611	0.86563	16.23	66.16	42.77	958592	492154	733552	9.88	8.5	16.69	High	High	Not Found	High	High	High	Peak Found	High	High
AAS95940.1	1462	cytochrome c assembly protein, putative	8.034	9	3	10	3	243	27.6	9.95	4.78	3	0	1.287	0.603	0.461	0.695868	0.721433	0.378467	32.81	63.6	54.29	2.32898e+06	3.0472e+06	1.8391e+06	21.31	15.1	53.64	High	High	High	High	High	High	High	High	High
AAS95766.1	1288	cytochrome c family protein	15.154	18	2	15	2	126	14.5	7.96	24.54	2	0	0.785	0.557	0.704	0.814027	0.722096	0.901583	18.04	30.44	37.85	1.41216e+06	1.19851e+06	675428	42.97	25.1	37.82	High	High	High	High	High	High	High	High	High
AAS97614.1	3144	cytochrome c family protein	10.554	6	3	11	3	542	59.8	8.41	4.07	3	0	1.466	1.257	0.812	0.695868	0.987534	0.964502	40.91	61.47	63.63	665800	819560	559051	11	12.05	15.53	High	High	High	High	High	High	High	High	High
AAS96955.1	2483	cytochrome c family protein	112.172	30	12	127	12	581	61.9	7.61	292.1	12	0	0.989	1.413	1.302	0.971674	0.921278	0.974669	47.61	51.95	33.95	1.78651e+07	1.86609e+07	2.64055e+07	31.21	18.94	33.65	High	High	High	High	High	High	High	High	High
AAS96956.1	2484	cytochrome c family protein	19.812	9	5	19	5	430	47.7	8.94	33.39	5	0	0.62	0.837	1.079	0.139795	0.937226	0.998377	41.09	58.73	65.81	7.7541e+06	6.75196e+06	7.1758e+06	13.06	6.31	10.94	High	High	High	High	High	High	High	High	High
AAS95106.1	625	cytochrome c nitrite reductase, catalytic subunit NfrA, putative	235.538	44	31	381	31	524	60	8.38	580.2	31	0	1.004	1.579	1.528	0.966597	0.833416	0.896116	51.77	57.33	47.78	6.75341e+07	6.8835e+07	9.22658e+07	8.55	3.75	5.61	High	High	High	High	High	High	High	High	High
AAS96289.1	1812	cytochrome c oxidase, subunit II, putative	63.715	33	13	60	13	426	46.9	5.52	66.91	13	0	0.879	0.952	1.199	0.900092	0.987785	0.997949	36.62	35.58	29.71	5.58901e+06	3.9876e+06	5.27215e+06	20.47	16.48	29.67	High	High	High	High	High	High	High	High	High
AAS97741.1	3271	cytochrome d ubiquinol oxidase, subunit I	54.705	14	6	88	6	433	48.3	9.09	187.82	6	0	0.633	1.088	1.537	0.143326	0.996375	0.890566	52.72	30.48	60.04	2.71607e+07	3.06155e+07	4.28865e+07	16.73	12.88	7.38	High	High	High	High	High	High	High	High	High
AAS97740.1	3270	cytochrome d ubiquinol oxidase, subunit II	14.617	8	4	24	4	341	37.8	7.61	29.26	4	0	1.098	0.955	1.142	0.918347	0.993965	0.997949	46.23	81.91	50.32	3.65762e+06	3.60358e+06	2.65853e+06	19.55	29.85	20.45	High	High	High	High	High	High	High	High	High
AAS94898.1	415	cytosol aminopeptidase	113.003	48	19	81	19	507	53.7	5.26	110.62	19	0	1.136	2.133	1.737	0.844655	0.476817	0.796345	85.19	66.34	76.58	5.12303e+06	4.44359e+06	7.99858e+06	15.87	46.55	42.75	High	High	High	High	High	High	High	High	High
AAS96351.1	1875	dafA protein	11.239	21	2	5	2	105	12	5.26	6.58	2	0	1.17	1.362	1.564	0.952049	0.964364	0.907136	34.9	55.37	45.65	386362	167119	502704	5.2	49.5	10.75	Peak Found	High	Not Found	Peak Found	High	Not Found	High	High	High
AAS95459.1	979	DAK1 domain protein	180.48	62	24	188	24	354	38.1	5.06	353.64	24	0	0.573	1.541	2.569	0.0385434	0.860981	0.350278	55.48	78.13	52.01	6.05334e+07	2.7348e+07	6.04071e+07	34.66	16.72	29.62	High	High	High	High	High	High	High	High	High
AAS95460.1	980	DAK2 domain protein	27.987	49	6	29	6	210	22.2	5.97	34.07	6	0	0.952	1.548	1.425	0.971674	0.895452	0.910701	60.11	59.51	65.51	779765	719075	1.50299e+06	38.04	27.61	22.79	High	High	High	High	High	Not Found	High	High	High
AAS96418.1	1942	DAK2 domain/degV family protein	9.631	9	4	8	4	637	68.9	5.83	0	4	0	1.073	1.301	0.473	0.971674	0.971272	0.717208	63.48	88.67	69.4	542121	490299	273107	39.5	56.03	28.7	High	Peak Found	High	High	Peak Found	Not Found	High	High	Peak Found
AAS96007.1	1529	decarboxylase family protein	40.366	33	5	56	5	218	24.5	5.68	79.37	5	0	1.022	0.79	0.722	0.95033	0.898315	0.812714	43.38	58.18	52.78	9.1047e+06	9.02901e+06	7.75924e+06	9.43	19.94	28.2	High	High	High	High	High	High	High	High	High
AAS97256.1	2784	dehydrogenase, FMN-dependent family	86.906	53	13	117	13	341	34.9	6.68	225.02	13	0	1.02	0.755	0.682	0.952046	0.865329	0.763948	52.97	70.12	64.41	1.44714e+07	1.53695e+07	9.44214e+06	14.7	60.06	9.32	High	High	High	High	High	High	High	High	High
AAS94362.1	A0098	dehydrogenase, putative	23.271	22	6	18	6	349	37.1	7.01	5.06	6	0	0.633	0.601	0.981	0.307384	0.717955	0.997949	94.21	50.43	95.59	2.65863e+06	2.10703e+06	1.60521e+06	20.66	13.5	8.02	High	High	High	High	High	High	High	High	High
AAS94596.1	112	deoxyribodipyrimidine photolyase, putative	19.836	12	4	8	4	474	52.9	8.6	6.34	4	0	0.663	0.612	0.844	0.669881	0.817705	0.980264	30.19	29.31	46.1	640907	337976	352258	15.17	17.49	19.93	Peak Found	High	Peak Found	High	Peak Found	Peak Found	High	High	High
AAS97653.1	3183	desulfoferrodoxin	31.622	28	3	51	3	126	14	6.4	103.07	3	0	1.621	5.645	3.402	0.136815	0.0013618	0.111671	97.33	58.62	79.38	2.14002e+06	5.35902e+06	1.75479e+07	44.33	67.01	36.57	High	High	High	High	High	Peak Found	High	High	High
AAS94939.1	456	DHH family protein	52.269	29	11	63	11	335	38.2	9.2	91.65	11	0	0.754	0.696	0.841	0.572025	0.791343	0.921499	66.88	58.99	63.47	1.60525e+07	1.66526e+07	9.49885e+06	18.48	21.79	14.73	High	High	High	High	High	High	High	High	High
AAS97038.1	2566	diaminopimelate decarboxylase	14.205	6	3	20	3	421	46.2	5.59	20.04	3	0	0.843	0.3	0.381	0.832815	0.0673286	0.282769	42.25	55.06	64.88	3.46282e+06	2.81533e+06	857478	8.14	24.2	34.48	High	High	High	High	High	High	High	High	High
AAS96124.1	1647	diaminopimelate decarboxylase	47.893	31	10	49	10	412	44.9	5.9	41.22	10	0	1.009	0.505	0.543	0.971674	0.427413	0.489591	64.17	76.2	58.22	5.49421e+06	5.46315e+06	2.94646e+06	6.44	6.93	25.09	High	High	High	High	High	High	High	High	High
AAS96087.1	1609	dihydrodipicolinate reductase	58.891	60	12	64	12	259	28	6.43	113.15	12	0	0.842	1.407	1.441	0.832815	0.921572	0.926726	70.19	73.9	59.49	1.16669e+07	9.14671e+06	1.19283e+07	40.83	15.56	11.69	High	High	High	High	High	High	High	High	High
AAS96344.1	1868	dihydrodipicolinate synthase	86.728	46	14	159	14	292	31.9	5.71	264.77	14	0	0.655	1.076	1.542	0.200877	0.999616	0.887325	52.8	53.46	56.56	3.18722e+07	2.33808e+07	3.59334e+07	3.99	16.24	18.39	High	High	High	High	High	High	High	High	High
AAS97374.1	2902	dihydroorotase	44.129	21	9	46	9	422	45.3	5.77	53.12	9	0	0.859	0.753	0.855	0.858104	0.85393	0.925459	59.9	71.11	75.72	6.37e+06	3.88544e+06	4.38077e+06	30.49	29.31	24.35	High	High	High	High	High	High	High	High	High
AAS97784.1	3316	dihydroorotate dehydrogenase	35.672	36	7	28	7	307	32.3	5.53	34.59	7	0	1.079	1.556	1.682	0.942506	0.844846	0.829128	60.68	67.37	46.98	3.37218e+06	2.31876e+06	4.05843e+06	42.69	29.24	35.42	High	High	Peak Found	High	High	High	High	High	High
AAS97783.1	3315	dihydroorotate dehydrogenase, electron transfer subunit	51.327	33	7	51	7	272	30.3	6.43	70.35	7	0	1.255	1.612	1.52	0.528858	0.819244	0.896116	64.74	68.23	49.8	2.10082e+07	6.3411e+06	2.04107e+07	66.03	37.09	15.75	High	High	High	High	High	High	High	High	High
AAS95757.1	1279	dihydropteroate synthase	12.953	13	3	6	3	286	30.5	5.87	6.66	3	0	0.573	1.345	4.846	0.539852	0.956732	0.0880048	208.97	75.87	57.54	530557	190023	798742	6.53	96.98	30.61	High	Peak Found	High	Peak Found	Peak Found	High	High	High	Peak Found
AAS95142.1	661	dihydrouridine synthase family protein	6.409	8	2	4	2	332	36.2	7.91	0	2	0	0.791	1.44	1.815	0.920602	0.966741	0.877866	57.55	47.57	33.35	98852.7	98401.8	145764	49.41	27.12	26.53	Peak Found	High	Peak Found	High	Peak Found	Not Found	High	Peak Found	High
AAS94538.1	54	dihydrouridine synthase family protein	7.548	11	3	7	3	419	44.5	6.46	0	3	0	0.76	1.222	1.662	0.849278	0.993965	0.896116	29.54	32.07	33.99	282947	233348	337263	25.55	11.06	16.15	High	High	Peak Found	Peak Found	High	Not Found	High	High	High
AAS97842.1	3373	dihydroxy-acid dehydratase	161.607	50	24	200	24	554	57.8	6.33	352.67	24	0	0.856	1.199	1.4	0.866809	0.992001	0.947979	53.21	38.86	55.43	4.48802e+07	3.59752e+07	4.97526e+07	14.47	5.86	12.64	High	High	High	High	High	High	High	High	High
AAS96274.1	1797	dimethyladenosine transferase	15.755	13	3	12	3	291	31.7	9.22	14.97	3	0	0.904	0.359	0.512	0.944842	0.285193	0.68287	128.63	62.43	92.36	1.37849e+06	1.29795e+06	540955	53.21	31.35	2.05	High	High	High	High	Peak Found	High	High	High	High
AAS95890.1	1412	D-isomer specific 2-hydroxyacid dehydrogenase family protein	57.68	34	8	42	8	326	35	6.62	46.46	8	0	0.718	0.916	1.574	0.419067	0.965359	0.87048	72.32	78.32	98.3	9.3785e+06	9.23377e+06	7.06548e+06	82.84	18.89	8.9	High	High	High	High	High	High	High	High	High
AAS94822.1	339	D-isomer specific 2-hydroxyacid dehydrogenase family protein	93.85	50	12	112	12	301	32.2	5.72	199.73	12	0	1.144	0.876	0.837	0.773025	0.953611	0.91925	66.91	70.08	67.32	2.16404e+07	2.31598e+07	1.52007e+07	13.17	9.29	14.44	High	High	High	High	High	High	High	High	High
AAS94885.1	402	dissimilatory sulfite reductase alpha subunit	265.804	48	27	828	27	437	49.1	5.64	1700.98	27	0	1.007	1.587	1.848	0.96174	0.830619	0.738339	68.13	71.46	85.09	1.81663e+08	1.80509e+08	3.06757e+08	12.42	15.23	26.63	High	High	High	High	High	High	High	High	High
AAS94887.1	404	dissimilatory sulfite reductase B	8.333	28	2	14	2	78	8.8	5.45	24.4	2	0	1.204	1.67	1.165	0.67757	0.793085	0.997949	38.34	76.25	56.1	7.76352e+06	6.91243e+06	8.24328e+06	26.47	32.74	50.89	High	Peak Found	High	High	High	High	High	High	High
AAS94886.1	403	dissimilatory sulfite reductase beta subunit	218.65	40	22	1189	22	381	42.5	7.27	2020.64	22	0	0.857	1.342	1.609	0.867617	0.949453	0.850842	63.42	60.25	56.92	2.39268e+08	1.93371e+08	3.36322e+08	2.88	26.65	22.02	High	High	High	High	High	High	High	High	High
AAS97248.1	2776	dissimilatory sulfite reductase, gamma subunit	39.28	44	5	99	5	105	11.9	5.26	172.12	5	0	1.164	1.895	1.215	0.725136	0.637456	0.985375	86.81	110.7	119.11	2.81148e+07	3.96248e+07	4.42002e+07	48.59	21.48	34	High	High	High	High	High	High	High	High	High
AAS94488.1	4	DNA gyrase, A subunit	97.896	23	20	85	20	856	95.4	6.83	111.43	20	0	0.711	1.041	1.462	0.393744	0.993965	0.91925	60.67	55.62	69.85	1.38616e+07	9.409e+06	1.38544e+07	28.78	26.68	7.11	High	High	High	High	High	High	High	High	High
AAS94487.1	3	DNA gyrase, B subunit	149.466	38	26	138	26	798	88.7	5.94	211.18	26	0	0.847	1.327	1.535	0.844655	0.953607	0.89316	57.81	60.93	53.97	1.5321e+07	4.19456e+07	1.78155e+07	48.31	6.71	5.2	High	High	High	High	High	High	High	High	High
AAS94966.1	483	DNA mismatch repair protein MutL, putative	60.739	23	14	57	14	744	80.3	6.4	50.16	14	0	1.178	0.92	0.762	0.791465	0.966741	0.833374	33.5	51.54	44.82	5.22747e+06	5.61086e+06	4.0725e+06	10.27	3.17	11.41	High	High	High	High	High	High	High	High	High
AAS96126.1	1649	DNA mismatch repair protein MutS	53.356	18	12	32	12	905	101.5	6.07	23.72	12	0	1.052	0.699	0.728	0.953718	0.823502	0.833374	84.14	63.78	56.01	3.13817e+06	3.3595e+06	2.45453e+06	52.93	17.77	9.67	High	High	High	High	High	High	High	High	High
AAS94978.1	496	DNA polymerase I	100.838	25	20	86	20	1015	110	6.19	92.47	20	0	1.121	0.731	0.651	0.814027	0.830619	0.730157	39.68	64.05	51.44	1.50306e+07	1.51726e+07	1.60687e+07	36.67	13.06	19.36	High	High	High	High	High	High	High	High	High
AAS95831.1	1353	DNA polymerase III, alpha subunit	33.459	10	8	25	8	1164	130.5	5.59	16.73	8	0	1.23	1.352	1	0.870738	0.938238	0.997949	24.79	31.44	18.24	1.00356e+06	954282	3.07077e+06	3.6	14.24	65.49	High	High	High	High	High	Not Found	High	High	High
AAS94486.1	2	DNA polymerase III, beta subunit	110.384	48	17	116	17	384	42.8	4.78	147.77	17	0	0.929	1.543	1.729	0.966597	0.858785	0.7971	53.14	64.5	63.1	1.74092e+07	1.39204e+07	2.40236e+07	14.67	14.5	15.87	High	High	High	High	High	High	High	High	High
AAS97668.1	3198	DNA polymerase III, gamma and tau subunits, putative	117.809	36	20	92	20	778	80.7	6.61	95.67	20	0	0.712	1.423	1.907	0.395083	0.915515	0.718061	53.1	53.75	57.47	1.16531e+07	5.81826e+06	1.08865e+07	34.35	6.28	22.1	High	High	High	High	High	High	High	High	High
AAS97668.1	3198	DNA polymerase III, gamma and tau subunits, putative	64.746	27	12	48	12	616	66	6.62	50.13	12	0	0.997	1.171	1.125	0.99509	0.993965	0.999667	46.62	72.61	54.03	6.78688e+06	3.44651e+06	7.57666e+06	17.12	11.65	12.58	High	High	High	High	High	High	High	High	High
AAS96068.1	1590	DNA repair protein RadA	57.423	34	11	47	11	456	48.6	8.34	53.22	11	0	1.136	0.776	0.687	0.841582	0.914747	0.762131	31.65	50.3	36.83	4.19682e+06	5.15168e+06	3.24427e+06	11.36	23.92	0.48	High	High	High	High	High	High	High	High	High
AAS96935.1	2463	DNA repair protein RecN	25.729	16	7	23	6	539	60.4	5.19	17.22	7	0	1.317	1.007	0.683	0.784406	0.993965	0.874432	47.92	46.02	71.54	1.40427e+06	1.40924e+06	811490	14.16	40.35	21.3	High	High	High	High	High	High	High	High	High
AAS97858.1	3389	DNA topoisomerase I	124.797	41	24	103	24	760	84.2	7.62	91.96	24	0	0.969	1.001	1.061	0.996749	0.993965	0.997949	50.34	53.84	44.81	1.1158e+07	1.04846e+07	1.05293e+07	120.91	7.26	2.7	High	High	High	High	High	High	High	High	High
AAS94839.1	356	DNA-3-methyladenine glycosylase I	20.502	32	5	22	5	191	21.3	7.18	25.5	5	0	1.232	0.891	0.541	0.766435	0.964364	0.513039	36.48	60.83	46.91	2.39857e+06	2.74379e+06	5.12668e+06	6.17	25.83	56.39	High	High	High	High	High	High	High	High	High
AAS97663.1	3193	DNA-binding domain, excisionase family	83.661	42	12	82	12	366	39.6	8.12	126.61	12	0	1.086	1.597	1.526	0.867738	0.824101	0.896116	35.37	43.82	39.61	8.57937e+06	9.48676e+06	1.42812e+07	9.29	9.74	11.96	High	High	High	High	High	High	High	High	High
AAS96222.1	1745	DNA-binding protein	7.768	12	2	5	2	179	19.7	6.33	10.24	2	0	1.123	1.565	1.717	0.95033	0.886389	0.818461	62.54	82.5	105.77	614912	965080	781622	36.37	46.16	16.38	High	High	Peak Found	Peak Found	Peak Found	High	Peak Found	High	High
AAS96724.1	2251	DNA-binding protein	53.715	49	7	59	7	186	20.9	5.66	104.27	7	0	2.012	1.894	0.865	0.000636961	0.637456	0.943933	58.94	60.31	37.59	1.04545e+07	1.69078e+07	1.39426e+07	72.96	31.15	15.87	High	High	High	High	High	High	High	High	High
AAS97537.1	3066	DNA-binding protein	29.347	30	4	29	4	189	21.5	5.74	53.91	4	0	0.758	0.763	0.982	0.625336	0.870104	0.984176	81.56	102.07	85.21	2.94223e+06	2.98714e+06	9.59705e+06	40.15	45.76	82.03	High	High	High	High	High	High	High	High	High
AAS94879.1	396	DNA-binding protein HU	75.099	78	11	146	11	95	10.8	9.94	273.36	11	0	0.735	0.323	0.45	0.49816	0.0443313	0.292491	68.39	73.23	85.99	3.39464e+07	3.46757e+07	1.10759e+07	22.23	17.62	51.87	High	High	High	High	High	High	High	High	High
AAS96272.1	1795	DNA-binding protein HU	54.652	62	6	127	6	90	9.7	10.2	185.21	6	0	0.94	1.4	1.629	0.971674	0.924507	0.837839	40.55	70.97	80.1	7.43743e+06	6.47728e+06	1.2217e+07	22.18	6.75	15.12	High	High	High	High	High	High	High	High	High
AAS97657.1	3187	DNA-binding protein HU	83.201	71	9	106	9	95	9.9	9.48	223.12	9	0	2.126	2.353	1.037	0.000170936	0.343846	0.997848	49.76	69.3	70.8	1.17896e+07	2.6061e+07	1.89289e+07	11.77	28.8	59.73	High	High	High	High	High	High	High	High	High
AAS95163.1	682	DNA-binding protein, putative	89.369	62	12	92	12	262	29.1	8.72	141.94	12	0	0.974	3.03	2.333	0.990809	0.112225	0.463996	66.13	54.65	54.78	7.15465e+06	1.03085e+07	2.47385e+07	19.8	21.02	9.94	High	High	High	High	High	High	High	High	High
AAS97060.1	2588	DNA-binding response regulator	9.06	12	3	7	3	226	24.7	5.5	0	3	0	1.306	0.649	0.677	0.832815	0.846138	0.877484	47.84	43.91	50.26	703526	759921	516747	37.6	25.8	34.09	Peak Found	High	High	High	High	High	Peak Found	High	Peak Found
AAS94742.1	259	DNA-binding response regulator	18.368	49	5	32	5	129	14.6	5.05	53.48	5	0	1.113	1.152	1.423	0.829076	0.993965	0.938496	77.59	52.8	87.15	1.85819e+07	2.17842e+07	1.47785e+07	30.04	14.88	25.1	High	High	High	High	High	High	High	High	High
AAS97147.1	2675	DNA-binding response regulator, LuxR family	33.114	37	6	21	6	227	24.4	7.42	35.78	6	0	0.761	0.76	0.837	0.71342	0.915515	0.953073	65.18	47.41	60.72	2.19845e+06	2.3768e+06	1.70766e+06	23.29	39.6	13.14	High	High	High	High	High	High	High	High	High
AAS97049.1	2577	DNA-binding response regulator, LuxR family	14.155	12	2	11	2	216	23.8	6.9	13.59	2	0	1.059	0.99	1.234	0.971674	0.993965	0.97619	92.55	66.75	89.11	701722	1.30258e+06	693363	22.75	74.37	18.16	Peak Found	High	High	Peak Found	High	High	High	High	High
AAS95807.1	1329	DNA-directed RNA polymerase, alpha subunit	198.063	64	23	512	23	347	38.9	5.16	743.12	23	0	1.032	1.131	1.138	0.942506	0.993965	0.998377	58.47	56.18	64.25	8.69249e+07	1.04781e+08	9.77414e+07	20.48	12.25	7.18	High	High	High	High	High	High	High	High	High
AAS97401.1	2929	DNA-directed RNA polymerase, beta prime subunit	556.584	53	80	978	80	1385	154.7	7.08	1490.97	80	0	1.039	1.057	1.063	0.937736	0.993965	0.997949	55.96	54.11	55.5	2.00676e+08	2.06501e+08	2.04768e+08	11.3	16.41	1.27	High	High	High	High	High	High	High	High	High
AAS97400.1	2928	DNA-directed RNA polymerase, beta subunit	641.194	51	85	1033	85	1372	153.1	5.95	1822.53	85	0	0.914	1.001	1.014	0.952046	0.993965	0.989483	50.56	49.9	55.8	2.33091e+08	2.3287e+08	2.22131e+08	3.81	6.71	4.48	High	High	High	High	High	High	High	High	High
AAS97712.1	3242	DNA-directed RNA polymerase, omega subunit	31.556	75	7	49	7	77	8.8	5.19	40.98	7	0	1.717	2.836	1.619	0.08648	0.167637	0.867606	102.17	64.89	61.15	2.82161e+06	3.86879e+06	6.39519e+06	44.14	21.8	8.26	High	High	High	High	High	High	High	High	High
AAS97713.1	3243	dnaJ protein	43.685	27	9	29	9	376	40.9	6.47	28.12	9	0	0.977	1.236	1.381	0.984103	0.979745	0.949735	65.78	60.8	73.51	2.30116e+06	2.53237e+06	2.96577e+06	5.92	16.27	28.28	High	High	High	High	High	Not Found	High	High	High
AAS96352.1	1876	dnaJ protein, putative	36.758	31	8	50	8	316	34.4	8.95	45.87	8	0	1.137	1.158	1.009	0.866809	0.993965	0.985375	61.22	45.81	43.84	3.84597e+06	3.30168e+06	3.82377e+06	19.3	15.4	9.59	High	High	High	High	High	High	High	High	High
AAS95291.1	811	dnaK protein	238.831	53	33	236	33	636	68.6	5.14	406.68	33	0	1.36	2.782	1.789	0.290644	0.173567	0.764811	67.02	76.76	71.87	2.61935e+07	4.10548e+07	5.8346e+07	9.07	33.15	10.88	High	High	High	High	High	High	High	High	High
AAS96623.1	2150	dnaK suppressor protein, putative	14.687	44	4	17	4	120	13.8	5.05	0	4	0	1.265	1.183	1.381	0.824746	0.992001	0.924126	69.04	52	98.95	1.82703e+06	1.53345e+06	1.61226e+06	28.14	57.32	33.58	High	High	High	High	Peak Found	High	High	High	High
AAS95692.1	1214	dolichyl-phosphate-mannose-protein mannosyltransferase family protein	48.34	13	8	32	8	730	77.6	6.48	40.01	8	0	1.243	1.308	1.34	0.630424	0.955519	0.964272	57.47	55.32	54.8	2.62497e+06	9.28776e+06	4.10065e+06	23.15	56.19	11.42	High	High	High	High	High	High	High	High	High
AAS94518.1	34	DSBA-like thioredoxin domain protein	51.526	49	10	36	10	261	29.1	7.91	30.12	10	0	1.018	1.949	1.8	0.971674	0.611965	0.796345	54.51	75.05	83.79	3.04219e+06	3.6898e+06	6.30164e+06	10.48	13.26	11.44	High	High	Peak Found	High	High	High	High	High	High
AAS95179.1	698	dTDP-4-dehydrorhamnose 3,5-epimerase	15.576	17	3	9	3	190	21.6	6.14	7.8	3	0	1.138	2.6	2.312	0.959112	0.550501	0.60953	71.25	42.23	60.63	297560	393482	661776	4.58	9.79	27.2	Not Found	High	High	High	Peak Found	Not Found	High	High	High
AAS95841.1	1363	dTDP-4-dehydrorhamnose reductase	26.295	26	4	17	4	291	31.3	6.52	8.75	4	0	0.952	0.789	1.234	0.971674	0.938238	0.976098	57.86	63.21	72.77	1.22235e+06	958463	953421	10.37	23.29	5.5	High	High	Peak Found	High	High	High	High	High	High
AAS95842.1	1364	dTDP-glucose 4,6-dehydratase	19.12	26	6	17	6	340	37.8	6.06	5.57	6	0	0.708	0.46	0.597	0.74007	0.549283	0.829128	34.79	57.12	43.72	909684	518153	323783	6.8	5.9	11.22	High	High	Peak Found	Peak Found	High	Peak Found	High	High	High
AAS96435.1	1959	EAL domain/GGDEF domain protein	93.354	31	21	45	21	797	88.4	6.48	52.86	21	0	1.628	4.191	2.975	0.375971	0.0176186	0.212784	119.65	78.57	46.91	2.15397e+06	1.35045e+06	6.32239e+06	28.62	12.52	9.58	High	High	High	High	Peak Found	Peak Found	High	High	High
AAS94917.1	434	Ech hydrogenase, subunit EchA, putative	34.275	8	5	46	5	648	69.1	8.31	55.76	5	0	0.741	0.424	0.409	0.528858	0.211538	0.194299	58.36	76.66	90.91	9.27537e+06	6.54942e+06	4.93476e+06	20.15	9.21	18.24	High	High	High	High	High	High	High	High	High
AAS94915.1	432	Ech hydrogenase, subunit EchC, putative	38.703	37	5	92	5	157	16.8	6.74	152.98	5	0	0.807	0.321	0.386	0.747365	0.0426823	0.151495	53.76	51.85	44.14	3.07083e+07	2.79677e+07	9.98336e+06	6.31	12.17	6.71	High	High	High	High	High	High	High	High	High
AAS94914.1	431	Ech hydrogenase, subunit EchD, putative	14.104	20	2	27	2	130	14.6	4.77	30.79	2	0	0.775	0.459	0.618	0.645643	0.318368	0.68287	38.47	104.19	79.7	5.61221e+06	4.35593e+06	2.65861e+06	19.8	12.17	26.16	High	High	High	High	High	High	High	High	High
AAS94913.1	430	Ech hydrogenase, subunit EchE, putative	138.884	47	17	257	17	358	40.1	6.68	430.32	17	0	0.669	0.325	0.532	0.242225	0.0463509	0.482288	67.01	71.31	96.01	6.41391e+07	4.83417e+07	2.03681e+07	17.25	14.89	19.53	High	High	High	High	High	High	High	High	High
AAS94912.1	429	Ech hydrogenase, subunit EchF, putative	36.195	46	7	64	7	133	14.8	8.41	90.94	7	0	1.013	0.306	0.375	0.955845	0.0312325	0.132602	58.01	69.46	63.23	1.89509e+07	1.68511e+07	6.65642e+06	7.75	41.3	24.94	High	High	High	High	High	High	High	High	High
AAS97717.1	3247	efflux transporter, RND family, MFP subunit	57.821	34	11	46	11	389	41.8	9.06	58.47	11	0	1.067	1.779	1.665	0.942506	0.708815	0.842188	68.16	57.46	48.27	4.49212e+06	4.4848e+06	6.54627e+06	36.42	15.18	42.19	High	High	High	High	High	High	High	High	High
AAS96911.1	2439	efflux transporter, RND family, MFP subunit	79.585	43	16	77	16	411	45.8	8.81	110.87	16	0	0.764	1.182	1.522	0.605136	0.993965	0.896116	62.83	29.33	60.8	3.16687e+07	1.31542e+07	2.12927e+07	11.02	3.19	24.25	High	High	High	High	High	High	High	High	High
AAS94542.1	58	efflux transporter, RND family, MFP subunit	29.859	22	7	18	7	383	40.2	6.61	15.15	7	0	0.674	1.013	1.403	0.625336	0.993965	0.921499	79.27	62.63	39.07	1.37478e+06	714142	1.49129e+06	18.8	10.31	8.52	High	High	High	Peak Found	High	Not Found	High	High	High
AAS94544.1	60	efflux transporter, RND family, MFP subunit	157.159	60	21	188	21	394	41.8	8.46	237.63	21	0	0.903	1.217	1.336	0.942506	0.98887	0.964272	55.15	52.91	61.74	2.31466e+07	2.34973e+07	2.72837e+07	16.75	6.97	16.04	High	High	High	High	High	High	High	High	High
AAS97264.1	2792	electron transport complex protein RnfC, putative	124.799	55	17	190	17	401	43.5	7.64	338.97	17	0	0.856	1.57	1.688	0.866809	0.842031	0.820248	51.82	51.34	63.17	2.52824e+07	2.40581e+07	3.75738e+07	17.26	16.56	8.14	High	High	High	High	High	High	High	High	High
AAS97267.1	2795	electron transport complex protein RnfE, putative	28.189	18	4	49	4	223	23.8	8.94	63.88	4	0	0.968	1.266	1.585	0.997497	0.964364	0.865574	58.17	32.17	59.2	8.71644e+06	1.10331e+07	1.10464e+07	4.45	9.66	16.3	High	High	High	High	High	High	High	High	High
AAS97266.1	2794	electron transport complex protein RnfG, putative	72.226	55	10	109	10	191	20.1	8.92	170.78	10	0	0.926	1.071	1.115	0.96174	0.998243	0.999667	55.5	43.36	59	3.60321e+07	3.91492e+07	3.57711e+07	12.3	23.97	10.1	High	High	High	High	High	High	High	High	High
AAS96676.1	2203	endoribonuclease, L-PSP family	38.923	78	8	42	8	124	13	5.41	75.35	8	0	0.997	0.972	0.777	0.987075	0.993965	0.852841	61.38	58.03	52.51	4.03989e+06	5.55209e+06	4.29638e+06	43.57	23.82	40.53	High	High	High	High	High	High	High	High	High
AAS94805.1	322	enolase	229.998	53	17	475	17	437	46.9	4.61	850.39	17	0	0.834	1.874	2.091	0.824746	0.656828	0.616353	70.57	68.42	63.87	5.91194e+07	4.9682e+07	9.33565e+07	16.91	9.88	4.26	High	High	High	High	High	High	High	High	High
AAS95274.1	794	enoyl-(acyl-carrier-protein) reductase	50.906	42	10	50	10	254	27	6.06	75.08	10	0	0.775	1.073	1.188	0.652968	0.997631	0.997848	55.87	62.16	56.09	5.9313e+06	5.46527e+06	6.55819e+06	16.76	21.79	28.51	High	High	High	High	High	High	High	High	High
AAS96463.1	1987	excinuclease ABC, A subunit	95.812	25	18	72	18	956	104	7.52	76.79	18	0	0.758	1.074	1.388	0.592095	0.999187	0.949735	51.15	53.56	54.02	9.02108e+06	6.10594e+06	7.76321e+06	12.03	20.73	16.15	High	High	High	High	High	High	High	High	High
AAS96083.1	1605	excinuclease ABC, B subunit	35.982	14	8	17	8	677	76	5.43	15.45	8	0	0.948	0.578	0.719	0.96948	0.721064	0.896116	32.2	64.93	71.08	1.93103e+06	1.37803e+06	1.39477e+06	22.82	23.63	43.38	High	High	High	High	High	Not Found	High	High	High
AAS97729.1	3259	exodeoxyribonuclease III	25.131	23	5	18	5	257	30	6.29	29.27	5	0	1.277	0.786	0.686	0.665203	0.929307	0.7713	69.22	61.16	67.4	2.06485e+06	4.35579e+06	2.28642e+06	35.58	19.66	10.09	High	High	High	High	High	High	High	High	High
AAS95826.1	1348	exodeoxyribonuclease VII, small subunit	11.872	33	2	7	2	81	9	4.68	6.4	2	0	1.347	1.02	0.896	0.875868	0.993965	0.984176	7.13	64.35	44.3	390965	217606	381577	36.7	8.19	39.76	Peak Found	High	Peak Found	High	Peak Found	Not Found	High	High	High
AAS94810.1	327	exopolysaccharide biosynthesis protein, putative	38.97	24	9	47	9	421	48.2	8.65	52.25	9	0	1.001	1.059	0.968	0.971674	0.994465	0.980264	86.2	58.63	36.99	6.33788e+06	6.67052e+06	5.63478e+06	75.83	81.49	7.59	High	High	High	High	High	High	High	High	High
AAS94764.1	281	exopolysaccharide biosynthesis protein, putative	38.624	16	7	22	7	479	53.9	8.65	25.51	7	0	1.075	1.141	0.942	0.96343	0.993965	0.997848	36.92	47.81	27.86	1.73023e+06	1.08416e+06	1.66857e+06	15.7	12.76	11.42	High	High	High	High	High	Peak Found	High	High	High
AAS95686.1	1208	fatty acid/phospholipid synthesis protein PlsX	43.241	29	8	44	8	345	36.9	7.44	42.72	8	0	1.122	0.88	1.238	0.883303	0.964364	0.984176	42.54	60.73	98.39	3.45955e+06	3.82448e+06	3.95633e+06	10.22	2.3	29.84	High	High	High	High	High	High	High	High	High
AAS94788.1	305	ferredoxin II	14.05	58	2	13	2	64	7.2	4.04	6.47	2	0	1.119	4.055	1.171	0.935944	0.034295	0.985375	27.3	32.84	50.2	2.15288e+06	1.58215e+06	2.56493e+06	28.76	13.37	33.18	High	Peak Found	High	High	High	Not Found	High	High	High
AAS94747.1	264	ferredoxin, 4Fe-4S, putative	178.221	47	20	245	20	439	49.6	7.2	398.83	20	0	0.924	1.793	1.797	0.959112	0.710097	0.763948	71.81	80.06	72.77	3.06637e+07	3.41186e+07	6.1333e+07	26.21	7.02	3.93	High	High	High	High	High	High	High	High	High
AAS96046.1	1568	ferritin	53.753	44	6	59	6	169	19.5	4.92	111.08	6	0	0.546	8.193	8.559	0.0612024	2.2954e-05	0.000117655	79.07	68.21	129.47	3.34642e+06	2.41106e+06	2.53716e+07	31.87	7.29	25.06	High	High	Peak Found	High	High	Not Found	High	High	High
AAS97044.1	2572	ferrous iron transport protein A, putative	19.163	44	4	15	4	86	9.1	6.73	19.94	4	0	0.953	0.497	0.579	0.971674	0.43336	0.645179	32.39	29.44	43.03	3.84635e+06	3.34309e+06	2.32699e+06	5.52	16.11	49.85	High	High	High	High	High	High	Peak Found	High	High
AAS97043.1	2571	ferrous iron transport protein B	306.44	51	32	668	32	732	79.6	5.31	1190.26	32	0	0.579	0.271	0.496	0.0458454	0.0139346	0.392846	48.7	66.29	66.82	2.76091e+08	2.05296e+08	1.04955e+08	8.42	15.07	30.83	High	High	High	High	High	High	High	High	High
AAS97697.1	3227	flagellar basal body-associated protein, putative	15.282	28	4	16	4	227	24.8	5.14	12.13	4	0	1.084	1.434	1.134	0.959112	0.930904	0.985375	63.41	74.39	28.13	1.10867e+06	1.13851e+06	1.21561e+06	14.44	2.26	11.64	High	High	High	High	High	Not Found	High	High	High
AAS97701.1	3231	flagellar biosynthesis protein FlhF, putative	24.426	19	6	13	6	365	38.9	8.05	6.53	6	0	0.509	0.654	1.006	0.200877	0.858688	0.999667	74.73	71.92	118.95	1.05984e+06	797791	567569	22.19	25.8	16.63	High	High	High	High	Peak Found	High	High	High	High
AAS94529.1	45	flagellar biosynthesis protein, FliO, putative	24.157	31	5	27	5	173	18.8	5.55	29.72	5	0	0.838	0.769	0.96	0.834684	0.898278	0.994465	67.88	56.25	21.31	3.37234e+06	1.55284e+06	2.24913e+06	50.98	147.66	9.39	High	High	Peak Found	High	High	High	High	High	High
AAS95343.1	863	flagellar hook-associated protein 2, putative	89.769	44	17	82	17	575	62.3	5.21	81.77	17	0	1.023	0.944	0.956	0.949811	0.981724	0.978987	77.19	58.39	81.92	7.23607e+06	1.12278e+07	1.04985e+07	31.32	28.05	33.75	High	High	High	High	High	High	High	High	High
AAS95001.1	519	flagellar hook-associated protein FlgK, putative	11.648	4	2	7	2	698	75.2	4.97	5.7	2	0	0.785	0.381	0.423	0.867617	0.395545	0.645179	35.05	58.34	87.76	480477	353443	173778	26.4	39.93	33.9	High	High	Not Found	Peak Found	High	Peak Found	High	High	Not Found
AAS95002.1	520	flagellar hook-associated protein FlgL, putative	22.936	13	5	16	5	523	55.5	4.79	16.37	5	0	0.926	0.514	0.442	0.952046	0.631048	0.462059	64.22	73.12	76.29	1.31673e+06	2.02786e+06	1.06672e+06	22.01	52.87	35.84	High	High	High	High	High	High	High	High	Peak Found
AAS95923.1	1445	flagellar hook-length control domain protein	17.974	14	5	12	5	531	57.7	5.85	1.69	5	0	1.234	2.733	6.26	0.918347	0.383156	0.0116818	58.95	59.03	60.56	447966	487588	978301	19.85	9.82	43.05	High	High	Peak Found	Peak Found	High	Peak Found	High	High	Not Found
AAS94795.1	312	flagellar motor switch protein FliG	34.854	22	6	23	6	338	37.5	4.96	26	6	0	1.48	0.731	0.499	0.578834	0.915515	0.60953	48.23	45.98	47.23	1.19647e+06	2.08086e+06	823754	16.5	84.21	19.74	High	High	High	High	High	High	High	High	High
AAS95390.1	910	flagellar motor switch protein FliM	18.742	22	5	14	5	326	36.6	5.11	14.44	5	0	1.346	0.855	0.626	0.653958	0.964364	0.768648	34.38	51.4	27.88	1.97179e+06	2.43494e+06	1.54806e+06	27.95	21.15	29.1	High	High	High	High	High	High	High	High	High
AAS94530.1	46	flagellar motor switch protein FliN	15.061	29	4	15	4	170	18.7	4.61	19.46	4	0	0.505	0.872	3.132	0.137098	0.968524	0.231968	94.88	51.04	122.33	1.53699e+06	1.50475e+06	1.15579e+06	20.48	34.66	26.5	High	High	High	High	High	High	High	High	High
AAS94796.1	313	flagellar M-ring protein FliF	50.741	25	10	44	10	538	59.6	5.17	32.6	10	0	1.057	1.077	1.132	0.95033	0.993965	0.999667	47.7	50.84	53.38	3.74497e+06	3.40438e+06	3.72322e+06	12.98	17.14	8.57	High	High	High	High	High	High	High	High	High
AAS94531.1	47	flagellar protein FliL	32.885	44	7	26	7	171	18.6	9.42	27.71	7	0	0.642	1.173	1.403	0.446277	0.993965	0.925947	108.07	96.3	58.38	2.10086e+06	1.24083e+06	2.89044e+06	11.67	18.06	34.76	High	High	High	High	High	High	High	High	High
AAS97700.1	3230	flagellar synthesis regulator FleN	55.265	31	6	36	6	275	29.8	6.06	36.51	6	0	0.916	1.002	0.931	0.942506	0.993965	0.964272	44.18	45.54	77.3	4.59913e+06	5.05518e+06	4.21468e+06	3.76	14.41	15.01	High	High	High	High	High	High	High	High	High
AAS96339.1	1863	flagellar synthesis regulator FleN, putative	18.488	17	3	10	3	272	29.4	5.85	14	3	0	1.291	1.385	0.809	0.816104	0.937226	0.954743	44.43	43.4	30.06	1.48369e+06	1.47584e+06	1.70508e+06	34.34	13.88	21.62	Peak Found	High	Peak Found	Peak Found	High	High	High	High	High
AAS96916.1	2444	flagellin	63.021	38	8	53	7	297	31.4	5.29	115.3	8	1	1.483	0.301	0.221	0.134673	0.0368583	0.00564213	65.46	94.8	93.63	1.06444e+07	1.51299e+07	3.30663e+06	7.47	49.71	46.86	High	High	High	High	High	High	High	High	High
AAS95919.1	1441	flagellin	23.002	20	4	21	3	298	31.6	5.2	25.15	4	0	1.418	0.279	0.256	0.592095	0.109365	0.0721892	67.04	63.55	74.17	1.65939e+06	2.33155e+06	431398	32.38	60.93	38.47	High	High	High	High	High	High	High	High	Peak Found
AAS96555.1	2082	flagellin, putative	25.462	19	4	25	3	297	31.4	5.33	51.21	4	0	1.193	0.513	0.306	0.882562	0.614997	0.139012	78.04	44.18	92.83	1.56262e+06	1.81778e+06	1.03816e+06	27.3	77.87	11.4	High	High	High	High	Peak Found	High	High	High	High
AAS97152.1	2680	flavodoxin	58.354	59	7	65	7	148	15.8	4.23	107.95	7	0	0.471	0.898	1.404	0.000943255	0.964089	0.945517	80.37	74.63	110.05	1.37577e+07	8.31057e+06	1.20793e+07	22.9	13.2	53.67	High	High	High	High	High	High	High	High	High
AAS95299.1	819	FMN reductase, NADPH-dependent	20.801	33	5	25	5	205	22.1	7.81	16.89	5	0	1.171	0.302	0.283	0.837409	0.0876211	0.0795813	38.91	108.11	74.94	2.79757e+06	3.03004e+06	824768	13.46	21.53	56.05	High	High	High	High	High	High	Peak Found	High	Peak Found
AAS97296.1	2824	formate acetyltransferase	70.203	19	12	49	12	828	93.9	5.92	63.78	12	0	1.489	1.634	1.061	0.26599	0.804124	0.997848	37.2	50.08	36.89	3.90468e+06	4.33657e+06	6.03071e+06	17.39	13.11	13.31	High	High	High	High	High	High	High	High	High
AAS96745.1	2272	formate acetyltransferase, putative	36.41	13	8	21	8	817	91.2	6.21	9.22	8	0	1.217	0.566	0.521	0.883825	0.76656	0.707592	33.02	54.73	34.57	1.02206e+06	838097	462018	7.23	6.74	21.73	High	High	Peak Found	High	Peak Found	Peak Found	High	High	High
AAS95059.1	578	formate dehydrogenase accessory protein FdhD, putative	39.643	45	9	39	9	262	28.3	7.17	42.86	9	0	1.28	0.757	0.607	0.575863	0.895298	0.625777	44.61	41.44	47.02	4.09347e+06	5.2785e+06	3.14573e+06	38.55	4.64	39.92	High	High	High	High	High	High	High	High	High
AAS95058.1	577	formate dehydrogenase formation protein FdhE, putative	24.551	21	5	17	5	293	32	5.54	21.45	5	0	0.933	3.266	2.934	0.959225	0.18225	0.261348	62.23	44	32.81	790470	252890	2.18025e+06	20.64	6.36	6.05	High	High	High	High	High	High	High	High	High
AAS96954.1	2482	formate dehydrogenase, alpha subunit, selenocysteine-containing	321.956	52	42	353	41	1003	110.8	8.54	510.74	42	1	0.743	1.84	2.198	0.532312	0.674147	0.544071	58.29	72.61	76.16	4.18183e+07	3.1006e+07	7.32566e+07	39.17	29.63	6.26	Peak Found	High	High	High	High	High	High	High	High
AAS95068.1	587	formate dehydrogenase, alpha subunit, selenocysteine-containing	227.107	46	38	237	37	1005	111.2	8.56	323.86	38	0	0.68	1.393	1.798	0.279504	0.929307	0.763948	75.81	67.35	75.92	3.70301e+07	2.83786e+07	4.76417e+07	6.81	4.17	21.92	High	High	High	High	High	High	High	High	High
AAS96953.1	2481	formate dehydrogenase, beta subunit, putative	83.354	53	15	105	14	260	29.2	8.82	183.9	15	1	0.754	1.332	1.882	0.573545	0.951685	0.730157	64.12	60.18	65.51	2.10941e+07	1.72022e+07	2.38623e+07	35.17	21.68	26.1	High	High	High	High	High	High	High	High	High
AAS95069.1	588	formate dehydrogenase, beta subunit, putative	53.882	44	10	74	9	236	26.4	7.72	108.04	10	0	0.826	1.309	1.413	0.824746	0.956732	0.943933	40.05	57.4	47.64	7.68587e+06	6.26761e+06	9.53251e+06	13.17	34.03	11.87	High	High	High	High	High	Peak Found	High	High	High
AAS96018.1	1540	formyltetrahydrofolate deformylase	30.311	24	5	29	5	284	31.9	6.83	33.25	5	0	1.141	1.064	1.061	0.900092	0.999187	0.998377	52.75	64.6	80.9	2.18963e+06	2.52845e+06	2.56256e+06	15.84	14.23	37.15	High	High	High	High	High	High	High	High	High
AAS96317.1	1841	fructose-1,6-bisphosphatase	69.998	39	11	61	11	337	37.5	5.95	65.2	11	0	0.899	1.609	1.188	0.926327	0.819244	0.997949	40.81	65.33	77.05	3.65853e+06	3.72514e+06	5.69597e+06	9.81	15.76	24.74	High	High	High	High	High	High	High	High	High
AAS96017.1	1539	fructose-1,6-bisphosphatase, class II	160.921	75	20	213	20	327	34.9	5.88	321.69	20	0	0.874	2.846	2.43	0.904766	0.15659	0.410006	73.27	68.91	50.04	3.06406e+07	2.73919e+07	7.05572e+07	17.66	18.49	6.63	High	High	High	High	High	High	High	High	High
AAS96616.1	2143	fructose-1,6-bisphosphate aldolase, class II	67.983	35	13	121	13	307	33.5	5.78	173.27	13	0	1.044	0.723	0.723	0.933234	0.819244	0.816571	55.51	65.52	58	2.32076e+07	2.77013e+07	1.80966e+07	15.72	11.86	22.6	High	High	High	High	High	High	High	High	High
AAS96144.1	1667	FtsK/SpoIIIE family protein	39.61	11	7	20	7	776	83.6	5.62	19.62	7	0	0.878	1.521	1.657	0.925081	0.870611	0.829128	52.99	38.25	45.18	1.60768e+06	1.65527e+06	2.88691e+06	25.73	6.97	11.86	High	High	High	High	High	Not Found	High	High	High
AAS94564.1	80	fumarate hydratase, class II	18.208	9	4	8	4	468	49.9	7.01	11.34	4	0	1.449	0.681	0.529	0.62499	0.87042	0.72541	38.54	46.5	46.71	1.34572e+06	1.18276e+06	743717	5.62	12.48	11	Peak Found	High	High	High	High	Not Found	Peak Found	High	High
AAS97732.1	3262	fumarate reductase, flavoprotein subunit	120.141	35	19	119	19	612	65.9	6.39	203.29	19	0	0.896	0.753	0.915	0.936868	0.860981	0.964272	46.83	40.49	50.86	1.64775e+07	1.37391e+07	1.32757e+07	17.27	18.59	11.21	High	High	High	High	High	High	High	High	High
AAS97733.1	3263	fumarate reductase, iron-sulfur protein	44.625	35	8	36	8	247	27.8	6.52	50.95	8	0	0.908	0.779	0.896	0.938474	0.91409	0.949735	65.03	38.45	59.73	4.35897e+06	4.58094e+06	3.62437e+06	25.79	29.5	29.06	High	High	High	High	High	High	High	High	Peak Found
AAS95355.1	875	fumarylacetoacetate hydrolase family protein	39.917	39	6	37	6	259	27.9	4.86	38.17	6	0	1.642	1.379	0.787	0.305835	0.93275	0.925947	59.85	72.33	52.79	1.83809e+06	2.26413e+06	1.88245e+06	10.52	13.24	24.55	High	High	High	High	High	High	High	High	High
AAS96159.1	1682	GAF domain protein	46.145	32	9	34	9	344	38.2	6.38	39.66	9	0	1.248	1.821	1.609	0.784406	0.722096	0.850842	61.59	68.91	67.9	2.14218e+06	2.40238e+06	3.74127e+06	6.33	27.37	11.5	High	High	High	High	High	High	High	High	High
AAS95047.1	566	GAF domain protein	125.835	76	15	189	15	185	20.1	6.05	329.86	15	0	0.945	1.322	1.381	0.971674	0.953611	0.950814	70.43	65.01	65.22	4.25189e+07	5.13917e+07	4.5849e+07	28.74	21.67	38.78	High	High	High	High	High	High	High	High	High
AAS97539.1	3068	GAF domain/sensory box/EAL domain protein	117.628	36	22	97	22	827	90.9	5.58	118.29	22	0	1.037	1.398	1.236	0.938474	0.9273	0.984176	59.53	49.91	42.87	8.47555e+06	7.80852e+06	8.27317e+06	19.46	19.43	16.32	High	High	High	High	High	High	High	High	High
AAS96429.1	1953	gamma-glutamyl phosphate reductase	110.731	41	16	101	16	419	44.3	5.88	172.18	16	0	0.904	1.04	1.161	0.943137	0.993965	0.997949	44.9	56.77	56.29	9.88691e+06	8.37005e+06	1.0283e+07	6.16	8.38	17.83	High	High	High	High	High	High	High	High	High
AAS94574.1	90	GDP-fucose synthetase	38.243	26	7	42	7	323	35.2	6.54	51.03	7	0	1.155	0.83	0.613	0.836531	0.938238	0.677894	84.9	41.67	56.49	3.69934e+06	3.99083e+06	2.95676e+06	18.48	16.28	19.61	High	High	High	High	High	High	High	High	High
AAS94931.1	448	GDP-mannose 4,6-dehydratase	98.363	49	13	139	13	381	42.9	6.76	186.29	13	0	0.936	0.949	0.98	0.971674	0.986041	0.983724	44.53	47.29	53.44	1.49038e+07	1.46246e+07	1.41102e+07	21.17	12.31	15.68	High	High	High	High	High	High	High	High	High
AAS95750.1	1272	general secretion pathway protein E, putative	31.55	18	8	18	8	573	62.6	6.38	9.82	8	0	0.885	1.214	0.975	0.930281	0.975359	0.997848	54.34	59.1	57.15	1.57983e+06	1.6316e+06	2.15355e+06	15.42	6.97	13.21	High	High	Peak Found	High	High	Peak Found	High	High	High
AAS95827.1	1349	geranylgeranyl diphosphate synthase	17.066	12	4	10	4	287	29.8	4.7	7.38	4	0	0.96	0.628	0.636	0.971674	0.819244	0.833374	39.43	37.78	73.31	1.23253e+06	1.10478e+06	749403	16.45	3.81	21.96	High	High	High	High	High	Peak Found	High	High	Peak Found
AAS97650.1	3180	GGDEF domain protein	50.07	15	10	39	10	833	92.7	6.18	48.53	10	0	1.201	0.764	0.644	0.652892	0.901395	0.720143	48.13	78.1	66.37	4.20553e+06	1.14056e+07	2.77064e+06	7.98	24.78	16.32	High	High	High	High	High	High	High	High	High
AAS96338.1	1862	GGDEF domain protein	10.769	11	3	13	3	331	36.4	5.85	8.41	3	0	1.285	0.62	0.604	0.879583	0.819244	0.833374	46.52	83.73	75.12	535904	630956	319813	3.39	17.19	18.98	High	High	Peak Found	High	High	Peak Found	High	High	High
AAS96263.1	1786	GGDEF domain protein	65.243	45	12	48	12	352	39.2	5.44	67.87	12	0	0.657	0.608	0.752	0.206274	0.630332	0.837839	80.2	62.55	115.87	9.39313e+06	7.86219e+06	7.50977e+06	25.94	15.66	6.81	High	High	High	High	High	High	High	High	High
AAS96823.1	2350	gid protein	24.969	17	7	17	7	474	50.9	5.48	9.3	7	0	0.99	0.836	0.705	0.998371	0.930904	0.78416	55.35	52.03	74.08	6.15917e+06	4.3792e+06	3.7582e+06	53.56	17.1	23.48	High	High	High	High	High	High	Peak Found	High	Peak Found
AAS95444.1	964	Glu/Leu/Phe/Val dehydrogenase family protein	268.43	44	40	360	40	997	110.5	6.13	541.81	40	0	0.898	0.754	0.776	0.938474	0.862669	0.867606	55.01	60.52	59.12	5.62595e+07	5.7943e+07	3.81892e+07	6.5	15.22	12.56	High	High	High	High	High	High	High	High	High
AAS95515.1	1035	glucokinase, putative	11.874	12	3	10	3	354	37.1	6.52	2.28	3	0	1.079	1.826	1.467	0.971674	0.811591	0.901583	48.4	40	44.93	466370	477409	788523	36.9	72.54	21.94	High	High	High	Peak Found	Peak Found	High	High	High	High
AAS97626.1	3156	glucosamine--fructose-6-phosphate aminotransferase (isomerizing)	116.749	39	19	136	19	607	66.2	6.54	216.49	19	0	0.934	1.135	1.34	0.971674	0.993965	0.964272	55.69	57.14	64.65	2.06225e+07	2.15911e+07	3.13422e+07	31.26	18.36	12.24	High	High	High	High	High	High	High	High	High
AAS94556.1	72	glucose-1-phosphate cytidylyl-transferase	49.585	42	9	66	9	259	29.9	6.7	97.77	9	0	1.045	1.249	1.13	0.930281	0.96737	0.998992	50.76	48.39	38.64	1.08733e+07	1.00623e+07	1.27081e+07	17.15	11.57	14.84	High	High	High	High	High	High	High	High	High
AAS95405.1	925	glucose-1-phosphate thymidylyltransferase	17.615	19	4	11	4	302	33.3	5.59	14.29	4	0	1.275	0.852	0.545	0.832815	0.966741	0.734891	38.97	72.61	13.24	937282	1.12869e+06	645395	34.71	8.05	17.9	High	High	Peak Found	Peak Found	High	High	High	High	High
AAS97692.1	3222	glucose-6-phosphate isomerase	94.031	49	16	101	16	447	48.7	6.16	111.71	16	0	1.171	1.755	1.566	0.728885	0.723643	0.875192	65.12	64.99	45.5	7.42284e+06	7.78048e+06	1.29515e+07	5.6	7.09	16.98	High	High	High	High	High	High	High	High	High
AAS95410.1	930	glutamate 5-kinase	15.479	21	4	11	4	380	40.5	5.83	11.92	4	0	1.499	0.951	0.617	0.636969	0.993965	0.819508	23.98	63.23	61.22	814730	826130	849357	22.07	35.79	18.04	High	High	Peak Found	High	Peak Found	Not Found	High	High	High
AAS95248.1	768	glutamate racemase	21.811	21	4	21	4	282	30.3	6.64	27.58	4	0	1.031	0.894	0.984	0.971674	0.967049	0.989094	42.29	40.22	40.07	2.10818e+06	2.57795e+06	2.3954e+06	19.37	29.25	19.28	High	High	High	High	High	High	High	High	High
AAS96299.1	1822	glutamate synthase, amidotransferase subunit, putative	8.106	9	2	6	2	364	41	6.34	4.69	2	0	1.061	1.281	1.226	0.971674	0.982819	0.977289	76.12	74.59	51.22	381646	530754	676596	68.65	37.05	17.86	High	Peak Found	Peak Found	High	High	High	Peak Found	Peak Found	High
AAS96300.1	1823	glutamate synthase, iron-sulfur cluster-binding subunit, putative	60.096	22	9	37	9	507	54.9	7.56	76.1	9	0	0.846	1.393	1.38	0.832815	0.930904	0.954743	57.64	56.47	46.75	5.27811e+06	4.35384e+06	7.05699e+06	1.35	10.84	14.99	High	High	High	High	High	Peak Found	High	High	High
AAS97760.1	3291	glutamate synthase, iron-sulfur cluster-binding subunit, putative	15.706	16	6	7	6	544	58.7	8.53	0	6	0	0.715	0.528	0.823	0.739886	0.709716	0.97619	68.29	113.72	82.07	620531	390724	364979	11.37	10.99	28.46	High	High	Peak Found	High	Peak Found	Not Found	Peak Found	High	High
AAS96948.1	2476	glutamate synthase, small subunit	20.262	18	6	14	6	476	51.2	5.76	8.36	6	0	1.395	1.902	1.305	0.714686	0.740024	0.953073	58.61	66.41	50.09	845163	1.13344e+06	1.49836e+06	22.44	8.91	16.96	Peak Found	High	Peak Found	Peak Found	High	Peak Found	High	High	High
AAS97638.1	3168	glutamate-1-semialdehyde-2,1-aminomutase	91.415	37	14	130	14	423	44.4	5.82	197.4	14	0	1.258	1.053	0.835	0.523044	0.993965	0.915503	40.34	42.57	43.6	2.07897e+07	3.03818e+07	2.584e+07	9.33	14.52	7.58	High	High	High	High	High	High	High	High	High
AAS94589.1	105	glutamine ABC transporter, ATP-binding protein	37.118	36	7	32	6	244	27.1	6.54	31.56	7	1	1.092	1.328	1.319	0.925408	0.950679	0.979103	55.1	32.51	38.77	3.0354e+06	4.77888e+06	4.55065e+06	8.81	10.15	4.55	High	High	High	High	High	High	High	High	High
AAS94591.1	107	glutamine ABC transporter, periplasmic glutamine-binding protein	47.968	29	8	45	8	249	26.9	8.54	51.67	8	0	1.409	5.14	3.594	0.325987	0.00311432	0.0851295	72.13	87.05	68.36	5.96937e+06	5.85906e+06	1.60877e+07	28.41	34.16	40.91	High	Peak Found	High	High	High	High	High	High	High
AAS94590.1	106	glutamine ABC transporter, permease protein	17.425	17	3	12	3	223	24	10.24	11.06	3	0	0.878	0.991	1.088	0.922596	0.993965	0.997949	34.6	27.85	56.98	2.04493e+06	1.88942e+06	1.79684e+06	2.48	2.31	16.48	High	High	High	High	Peak Found	High	High	High	High
AAS97861.1	3392	glutamine synthetase, type I	124.122	37	17	187	17	447	50.8	5.9	228.3	17	0	0.77	0.804	0.972	0.623627	0.911883	0.98323	58.24	67.55	60.53	4.23402e+07	3.97021e+07	4.03797e+07	9.27	7.55	14.84	High	High	High	High	High	High	High	High	High
AAS95736.1	1258	glutamine synthetase, type III	244.585	48	30	320	30	726	80.5	6.32	490.38	30	0	1.085	1.421	1.314	0.870643	0.916828	0.972027	63.19	58.98	46.45	3.84779e+07	4.16714e+07	5.23034e+07	8.69	2.99	14.41	High	High	High	High	High	High	High	High	High
AAS96088.1	1610	glutamine-dependent NAD+ synthetase	35.343	23	9	26	9	559	60	5.62	19.58	9	0	0.887	0.928	1.029	0.935944	0.993965	0.999667	87.45	57.72	64.26	1.81256e+06	1.03305e+06	1.57773e+06	25.61	32.27	37.93	High	High	High	High	Peak Found	Peak Found	High	High	High
AAS97422.1	2951	glutaminyl-tRNA synthetase	103.969	46	23	92	23	570	64.9	5.86	93.79	23	0	1.147	2.722	2.295	0.762834	0.19193	0.488477	60.1	66.51	66.53	7.09352e+06	1.01539e+07	1.84058e+07	34.07	48.15	6.22	High	High	High	High	High	High	High	High	High
AAS95939.1	1461	glutamyl-tRNA reductase	61.624	28	10	63	10	440	50	6.34	87.29	10	0	0.913	1.311	1.512	0.952046	0.959635	0.896116	57.06	44.28	61.87	6.00669e+06	6.69647e+06	8.45017e+06	6.5	91.07	11.91	High	High	High	High	High	High	High	High	High
AAS97024.1	2552	glutamyl-tRNA synthetase	56.858	28	11	45	11	463	51.5	5.87	49.73	11	0	1.026	2.511	1.909	0.983733	0.257802	0.737876	36.37	59.32	45.02	1.88301e+06	1.78982e+06	7.9158e+06	5.57	20.17	22.67	High	High	High	High	High	High	High	High	High
AAS95288.1	808	glutamyl-tRNA(Gln) amidotransferase, A subunit	93.431	51	18	89	18	489	51.6	5.55	95.59	18	0	0.9	1.222	1.252	0.942506	0.986041	0.98323	55.86	47.34	54.82	1.04018e+07	9.19049e+06	8.77278e+06	2.46	9.73	10.68	High	High	High	High	High	High	High	High	High
AAS96361.1	1885	glutamyl-tRNA(Gln) amidotransferase, B subunit	92.528	38	16	82	16	476	52.4	5.43	117.36	16	0	0.635	1.105	1.664	0.14738	0.993965	0.831894	67.89	55.68	78	9.35224e+06	7.1023e+06	7.97182e+06	4.05	6.95	5.7	High	High	High	High	High	High	High	High	High
AAS95289.1	809	glutamyl-tRNA(Gln) amidotransferase, C subunit	13.374	28	2	6	2	94	10.5	4.7	1.76	2	0	1.709	11.134	1.98	0.56886	0.000243315	0.689628	82.39	652.35	126.51	463543	639893	1.49932e+06	63.95	32.73	3.15	Peak Found	High	Peak Found	High	High	Peak Found	High	Peak Found	High
AAS95046.1	565	glyceraldehyde 3-phosphate dehydrogenase	150.988	53	15	273	15	338	37	6.92	416.24	15	0	0.681	1.329	1.745	0.280136	0.952143	0.79196	62.14	56.68	65.73	5.08973e+07	4.26705e+07	7.14465e+07	6.26	9	13.06	High	High	High	High	High	High	High	High	High
AAS96617.1	2144	glyceraldehyde 3-phosphate dehydrogenase	120.504	51	14	144	14	333	35.6	7.08	234.95	14	0	0.744	0.812	1.048	0.533133	0.915515	0.997949	49.58	45.56	54.83	3.66898e+07	2.60366e+07	2.64304e+07	12.96	15.25	29.42	High	High	High	High	High	High	High	High	High
AAS97604.1	3134	glycerol kinase	352.398	59	27	883	27	497	54.2	5.97	1823.73	27	0	0.929	0.403	0.447	0.966597	0.149483	0.284716	62.51	72.06	64.95	2.87822e+08	3.36508e+08	1.46719e+08	36.88	7.01	24.37	High	High	High	High	High	High	High	High	High
AAS97629.1	3159	glycerol-3-phosphate dehydrogenase (NAD(P)+)	24.417	28	7	14	7	330	34.7	5.58	9.59	7	0	0.753	0.846	0.962	0.78957	0.964364	0.997949	45.7	61.13	77.14	1.08575e+06	628797	726135	8.65	8.97	25.1	High	High	High	High	Peak Found	Peak Found	High	High	High
AAS97602.1	3132	glycerol-3-phosphate dehydrogenase, FAD-dependent	122.508	38	20	174	20	546	59.9	6.93	263.64	20	0	0.804	0.304	0.364	0.739215	0.0296973	0.117167	55.3	59.29	60.43	3.94199e+07	3.8799e+07	1.27859e+07	11.82	10.52	7.36	High	High	High	High	High	High	High	High	High
AAS95903.1	1425	glycine cleavage system P protein, subunit 1	83.395	35	14	114	14	443	48.1	5.82	169.2	14	0	0.984	1.056	1.207	0.974319	0.993965	0.990241	50.34	51.99	55.19	1.48566e+07	1.6541e+07	1.40955e+07	18.3	3.03	22.73	High	High	High	High	High	High	High	High	High
AAS95902.1	1424	glycine cleavage system P protein, subunit 2	107.528	58	20	123	20	481	52.4	6.67	166.87	20	0	0.849	1.073	1.26	0.851801	0.999187	0.98323	65.09	52.47	45.26	1.49281e+07	1.53008e+07	1.59653e+07	34.99	16.62	11.63	High	High	High	High	High	High	High	High	High
AAS96161.1	1684	glycine cleavage system T protein	25.639	12	5	29	5	376	40.9	6	36.36	5	0	0.86	0.495	0.555	0.866809	0.431464	0.614779	52.68	33.74	38.27	3.68746e+06	3.30465e+06	1.7331e+06	4.1	16.4	14.47	High	High	High	High	High	Peak Found	High	High	High
AAS96772.1	2299	glycine/betaine/L-proline ABC transporter, ATP binding protein	50.054	33	10	24	10	397	43.1	6.29	37.97	10	0	0.954	1.024	0.85	0.96948	0.993965	0.950061	54.92	90.91	54.41	2.71035e+06	2.54007e+06	2.27991e+06	41.69	16.48	38.35	High	High	High	High	High	High	High	High	High
AAS96717.1	2244	glycogen synthase	93.575	44	18	72	18	489	54.6	7.02	92.29	18	0	0.886	0.982	0.993	0.929563	0.993965	0.984176	70.44	58.48	52.8	5.32512e+06	8.69554e+06	5.25606e+06	27.61	8.06	18.01	High	High	High	High	High	High	High	High	High
AAS97498.1	3027	glycolate oxidase, subunit GlcD	164.069	54	20	329	20	461	49.3	6.28	653.87	20	0	1.413	0.667	0.431	0.210187	0.738834	0.245868	52.74	62.64	72.79	9.36574e+07	1.34413e+08	4.67089e+07	7.73	9.78	5.19	High	High	High	High	High	High	High	High	High
AAS94873.1	390	glycolate oxidase, subunit GlcD, putative	93.583	46	15	85	15	460	48.2	5.72	102.83	15	0	1.231	0.867	0.722	0.623627	0.950679	0.813861	40.32	68.17	46.41	6.51211e+06	7.99399e+06	6.30513e+06	16.36	7.7	16.38	High	High	High	High	High	High	High	High	High
AAS95307.1	827	glycolate oxidase, subunit GlcD, putative	9.439	8	3	9	3	471	50.1	6.35	1.98	3	0	0.926	0.833	0.732	0.953718	0.961193	0.935383	50.2	59.7	45.52	562378	515187	434029	17.61	14.57	14.37	High	High	High	High	High	High	High	High	High
AAS95344.1	864	glycoprotease family protein, putative	36.443	32	7	22	7	261	28	7.15	38.82	7	0	1.016	0.734	0.709	0.96174	0.910737	0.79196	74.88	61.07	142.3	1.99674e+06	1.1125e+07	1.23292e+06	24.75	8.01	32.97	High	High	High	High	High	Peak Found	High	High	High
AAS97466.1	2995	glycosyl transferase, group 1 family protein	23.468	11	4	12	4	387	42.8	6.18	17.16	4	0	1.031	0.593	0.485	0.980422	0.802676	0.632937	24.52	31.91	42.4	941852	1.05803e+06	606276	7.22	78.3	29.36	High	High	High	High	High	Peak Found	High	High	Peak Found
AAS97107.1	2635	glycosyl transferase, group 1 family protein	38.436	30	11	38	11	377	41.7	9.14	43.52	11	0	1.495	1.098	0.685	0.217947	0.993965	0.760884	45.59	51.33	67.4	3.6746e+06	5.57273e+06	3.29322e+06	9.69	59.66	16.83	High	High	High	High	High	High	High	High	High
AAS97662.1	3192	glycosyl transferase, group 1 family protein	19.719	15	5	15	5	386	41.1	9.52	3.79	5	0	1.283	0.833	0.619	0.832815	0.964364	0.820248	19.8	30.93	44.74	967723	924655	722336	8.72	23.65	4.99	High	High	High	High	Peak Found	High	High	High	High
AAS94383.1	A0072	glycosyl transferase, group 1 family protein	43.922	24	8	45	8	445	49.3	6.37	38.92	8	0	0.931	1.238	1.475	0.952046	0.96737	0.91074	46.29	57.3	65.31	2.9563e+06	2.45854e+06	3.79259e+06	6.47	8.95	35.63	High	High	High	High	High	High	High	High	High
AAS94763.1	280	glycosyl transferase, group 1 family protein	19.982	15	6	17	6	379	43.3	7.74	11.79	6	0	1.055	0.978	0.763	0.971674	0.993965	0.935383	36.14	36.66	54.02	977474	1.22363e+06	1.0617e+06	4.17	10.19	15.09	High	High	Peak Found	High	Peak Found	Not Found	High	High	High
AAS94811.1	328	glycosyl transferase, group 1 family protein	50.809	40	11	41	11	381	41.7	8.35	44.45	11	0	1.316	1.062	0.892	0.570384	0.999187	0.945517	56.78	50.46	56.59	3.17809e+06	5.45119e+06	4.40691e+06	18.61	19.18	1.31	High	High	High	High	High	High	High	High	High
AAS95540.1	1060	glycosyl transferase, group 1 family protein	25.103	21	6	11	6	367	39.8	8.16	9.57	6	0	0.922	1.349	1.189	0.957487	0.956732	0.98323	89.8	37.34	88.84	827057	745446	1.12201e+06	4.09	114.2	6.64	High	High	Peak Found	High	High	High	High	High	High
AAS97517.1	3046	glycosyl transferase, group 1 family protein	30.337	31	7	19	7	368	38.9	7.72	10.75	7	0	0.987	1.169	0.884	0.99509	0.993965	0.98323	95.98	94.33	57.06	1.03686e+06	1.02991e+06	983683	0.7	8.14	39.33	High	High	High	Peak Found	High	Not Found	High	High	High
AAS95541.1	1061	glycosyl transferase, group 1 family protein	26.66	19	5	18	5	353	39.1	8.03	17.78	5	0	0.795	0.701	0.928	0.803295	0.870056	0.990241	36.33	32.21	49.28	1.88359e+06	1.64731e+06	1.78178e+06	29.08	14.41	19.04	High	High	High	High	High	High	High	High	High
AAS95042.1	561	glycosyl transferase, group 1 family protein	61.108	43	13	48	13	367	40.6	7.8	59.68	13	0	0.595	0.879	1.052	0.120997	0.955519	0.997949	110.02	75.41	123.18	8.16473e+06	4.54269e+06	9.00617e+06	41.71	5.68	15.98	High	High	High	High	High	High	High	High	High
AAS94384.1	A0071	glycosyl transferase, group 1/2 family protein	62.339	23	12	55	12	718	78.7	6.18	52.5	12	0	0.918	0.952	0.996	0.953873	0.98824	0.984176	53.22	65.29	92.31	1.01767e+07	5.91221e+06	7.07709e+06	9.14	15.92	31.88	High	High	High	High	High	Peak Found	High	High	High
AAS94377.1	A0081	glycosyl transferase, group 1/2 family protein	13.693	8	4	8	4	704	77.9	8.02	1.85	4	0	1.353	1.036	1.055	0.777515	0.993965	0.998377	61.7	40.81	45.34	388412	1.32431e+06	322687	8.57	22.19	21.07	Not Found	High	Peak Found	Peak Found	High	Peak Found	High	High	High
AAS94467.1	A0080	glycosyl transferase, group 2 family protein	13.458	13	3	6	3	293	31.8	8.06	7.76	3	0	0.392	1.159	6.865	0.0319701	0.993965	0.00349086	86.04	36.59	119.53	1.90465e+06	198400	2.29035e+06	67.15	20.55	15.22	High	High	High	High	Peak Found	Peak Found	Peak Found	High	High
AAS97463.1	2992	glycosyl transferase, group 2 family protein	24.451	16	6	25	6	538	59.5	6.2	11.01	6	0	1.139	0.414	0.406	0.918347	0.38414	0.379739	48.49	46.78	47.47	1.76215e+06	2.20435e+06	574413	15.02	12.65	51.62	High	High	High	High	High	High	High	High	High
AAS96826.1	2353	glycosyl transferase, group 2 family protein	25.928	19	6	11	6	602	64.5	6.98	6.3	6	0	0.227	2.583	2.491	0.00311385	0.498899	0.469593	27.39	59.54	107.24	304347	431486	867346	40.15	24.03	5.76	High	Peak Found	High	Peak Found	High	Peak Found	High	High	Peak Found
AAS94560.1	76	glycosyl transferase, group 2 family protein	52.798	31	10	55	9	345	39.1	6.55	79.28	10	1	1.119	0.742	0.611	0.824746	0.858688	0.664969	47.51	37.94	39.4	8.22198e+06	7.31192e+06	5.41077e+06	11.78	21.27	8.31	High	High	High	High	High	High	High	High	High
AAS96825.1	2352	glycosyl transferase, group 2 family protein	25.127	14	6	25	6	545	59.9	6.54	15.7	6	0	1.139	0.744	0.595	0.922596	0.915515	0.763948	50.83	42.74	36.79	1.6991e+06	2.04546e+06	1.21359e+06	4.49	9	29.06	High	High	High	High	High	High	High	High	High
AAS97465.1	2994	glycosyl transferase, group 2 family protein	5.889	9	2	5	2	342	38.1	5.55	1.6	2	0	1.141	0.601	0.527	0.957487	0.804124	0.774709	54.24	51.8	54.24	179610	479997	107923	61.84	17.54	44.96	Peak Found	High	Peak Found	High	High	Not Found	High	Peak Found	Peak Found
AAS94777.1	294	glycosyl transferase, group 2 family protein	16.909	8	5	10	5	714	76.3	8.68	9.37	5	0	0.804	1.174	1.761	0.777515	0.993965	0.778094	45.18	56.05	78.3	5.91758e+06	7.81159e+06	6.65662e+06	28.02	21.99	4.17	High	High	High	High	Peak Found	Peak Found	High	High	High
AAS97484.1	3013	glycosyl transferase, group 2 family protein	32.306	13	7	26	7	568	62.4	6.4	39.51	7	0	0.943	0.83	0.763	0.96174	0.938238	0.877484	63.33	67.05	122.35	3.50571e+06	3.51777e+06	2.03706e+06	6.06	8	0.2	High	High	High	High	High	High	High	High	High
AAS97756.1	3287	glycosyl transferase, group 2 family protein	21.078	11	6	22	6	677	73.8	7.4	9.79	6	0	1.266	0.778	0.846	0.777515	0.93275	0.972027	43.05	89.48	91.05	1.73612e+06	2.46947e+06	1.12098e+06	19.96	7.52	12.23	High	High	High	High	High	High	High	High	High
AAS96525.1	2052	glycosyl transferase, group 2 family protein	16.294	13	3	10	3	240	27.2	9.14	6.69	3	0	6.291	3.677	1.236	0.000850084	0.21601	0.980209	24.9	53.4	35.81	109318	227741	666114	13.58	29.23	33.83	High	High	Not Found	Peak Found	High	Not Found	High	High	High
AAS96532.1	2059	glycosyl transferase, group 2 family protein	169.174	75	19	349	19	330	35.4	8.02	481.29	19	0	0.785	0.964	1.023	0.680329	0.992001	0.996467	55.8	70.14	69.25	5.75313e+07	5.30574e+07	4.89682e+07	7.49	19.68	7	High	High	High	High	High	High	High	High	High
AAS96827.1	2354	glycosyl transferase, group 2 family protein	39.266	23	7	28	7	415	45.2	6.42	45.02	7	0	0.971	1.118	1.149	0.971674	0.993965	0.997949	47.05	35.26	61.38	2.94161e+06	2.38691e+06	3.03575e+06	28.2	35.87	15.94	High	High	High	High	High	High	High	High	High
AAS96374.1	1898	glycyl-tRNA synthetase, alpha subunit	53.808	43	10	59	10	289	33.2	5.16	52.29	10	0	1.097	1.135	1.04	0.851801	0.993965	0.997848	38.44	44.35	42.76	7.70877e+06	9.55781e+06	9.47971e+06	6.45	15.11	10.96	High	High	High	High	High	High	High	High	High
AAS96373.1	1897	glycyl-tRNA synthetase, beta subunit	161.991	39	28	203	28	696	75.4	5.24	314.93	28	0	1.067	1.314	1.342	0.90199	0.956732	0.964272	49.46	51.44	44.07	2.92651e+07	3.24968e+07	4.46327e+07	6.87	7.65	17.06	High	High	High	High	High	High	High	High	High
AAS94761.1	278	glyoxalase family protein	26.947	41	4	15	4	140	14.8	5.47	22	4	0	1.54	4.597	1.89	0.7061	0.063364	0.729112	49.24	96.74	82.3	441735	638693	1.54461e+06	23.37	31.48	58.7	Not Found	High	High	High	High	High	High	High	High
AAS95523.1	1043	GMP synthase	202.966	62	28	261	28	515	57	6.23	366.92	28	0	0.758	1.437	2.143	0.580473	0.914747	0.580287	58.7	69.55	67.8	3.31968e+07	2.75529e+07	4.78927e+07	10.45	7.17	18.66	High	High	High	High	High	High	High	High	High
AAS96556.1	2083	GTP pyrophosphokinase	38.638	18	10	29	10	717	80.7	6.61	18.53	10	0	0.948	0.724	0.862	0.970067	0.891747	0.976855	69.01	58.92	56.6	2.24585e+06	1.97826e+06	1.56127e+06	14.93	43.98	4.48	High	High	High	High	High	Peak Found	High	High	High
AAS96245.1	1768	GTP-binding protein	45.291	40	13	38	13	410	43.7	6.47	32.29	13	0	0.765	0.192	0.246	0.606826	0.00127328	0.0125124	48.96	55.41	75.43	7.52607e+06	9.04494e+06	1.43113e+06	13.77	78.18	7.86	High	High	High	High	High	High	High	High	High
AAS95907.1	1429	GTP-binding protein	54.251	28	8	35	8	366	40	5.12	67.24	8	0	0.839	0.315	0.415	0.826504	0.0596922	0.277914	44.27	39.94	32.74	5.27085e+06	3.05541e+06	2.09316e+06	24.31	27.76	16.64	High	High	High	High	High	High	High	High	High
AAS96141.1	1664	GTP-binding protein	34.675	38	7	39	7	216	23.7	8.62	38.42	7	0	1.295	0.605	0.471	0.600647	0.674147	0.363053	40.04	38.44	40.69	3.5799e+06	3.95048e+06	2.46015e+06	13.6	21.1	16.47	High	High	High	High	High	High	High	High	High
AAS97664.1	3194	GTP-binding protein EngA	79.798	35	19	124	19	491	54.5	6.21	160.11	19	0	0.766	0.644	0.811	0.611471	0.706387	0.896116	50.75	52.22	63.43	2.02929e+07	1.85151e+07	1.46394e+07	11.77	31.42	18.78	High	High	High	High	High	High	High	High	High
AAS94536.1	52	GTP-binding protein Era	84.762	53	15	91	15	308	34.6	7.06	134.74	15	0	1.106	0.93	0.963	0.832815	0.968404	0.980264	76.33	72.14	70.13	1.30798e+07	1.63712e+07	1.2299e+07	8.72	15.63	15.77	High	High	High	High	High	High	High	High	High
AAS97706.1	3236	GTP-binding protein HflX	33.639	15	7	21	7	547	60.7	5.4	25.6	7	0	0.858	0.883	1.009	0.891894	0.964364	0.997949	70.85	93.87	55.69	2.35949e+06	1.89854e+06	2.37114e+06	9.88	8.05	23.12	High	High	High	High	High	High	High	High	High
AAS95183.1	703	GTP-binding protein LepA	53.535	21	10	52	10	601	67.2	5.68	77.86	10	0	0.989	0.764	0.881	0.971674	0.870104	0.949735	41.14	45.79	48.07	1.05109e+07	9.831e+06	8.4919e+06	9.08	21.31	3.65	High	High	High	High	High	High	High	High	High
AAS96704.1	2231	GTP-binding protein TypA	82.413	29	14	63	14	613	68.5	5.48	93.12	14	0	0.794	1.124	1.38	0.74978	0.993965	0.950814	87.98	73.3	85.16	7.77602e+06	5.40456e+06	7.15336e+06	7.29	9.07	50.01	High	High	High	High	High	High	High	High	High
AAS95409.1	929	GTP-binding protein, GTP1/OBG family	28.509	16	6	26	6	366	40.9	5.08	40.44	6	0	1.251	1.377	1.49	0.708029	0.930904	0.905221	89.1	62.88	87.65	2.79017e+06	3.2225e+06	4.4844e+06	40.05	4.87	34.56	High	High	High	High	High	High	High	High	High
AAS95380.1	900	guanylate kinase	26.959	36	7	18	7	207	23.7	5.76	23.53	7	0	0.74	0.627	0.81	0.564785	0.718486	0.913223	56.85	33.01	44.54	3.85833e+06	3.25802e+06	2.11254e+06	11.98	28.16	26.94	High	High	High	Peak Found	High	High	High	High	High
AAS95849.1	1371	HAD-superfamily hydrolase, subfamily IA	9.687	13	2	7	2	224	25.7	6.74	6.73	2	0	1.179	1.064	0.959	0.943999	0.996734	0.997949	75.43	57.27	90.09	505230	593184	465842	47.61	14.35	26.71	Peak Found	High	Peak Found	Peak Found	High	Not Found	High	High	Peak Found
AAS96417.1	1941	HAD-superfamily hydrolase, subfamily IIA	20.447	23	5	16	5	255	28.5	4.97	4.8	5	0	1.304	1.04	1.067	0.539589	0.999616	0.997949	80.03	86.37	72.47	2.33498e+06	7.31385e+06	1.29379e+06	31.86	34.24	8.35	High	Peak Found	High	High	High	Peak Found	High	High	High
AAS97624.1	3154	HAM1 family protein	19.203	24	4	13	4	207	22.5	5.35	13.46	4	0	0.486	1.076	1.45	0.226693	0.993965	0.909331	96.51	86.18	38.31	889959	503701	782650	24.15	33.11	23.38	High	High	Peak Found	Peak Found	High	Peak Found	High	High	High
AAS94361.1	A0099	HAMP domain protein	49.138	18	11	29	11	727	76.6	5.03	33.88	11	0	0.88	1.6	1.652	0.927	0.845157	0.831697	36.62	74.01	64.61	1.8091e+06	1.24833e+06	3.27835e+06	12.84	10.86	9.97	High	High	High	High	Peak Found	Peak Found	High	High	High
AAS97109.1	2637	HAMP domain protein	35.248	17	8	31	8	502	57	5.58	32.59	8	0	0.903	0.882	0.932	0.932055	0.964364	0.980209	30.35	40.06	52.02	2.95025e+06	2.50793e+06	2.48149e+06	6.29	27.74	6.86	High	High	High	High	High	High	High	High	High
AAS95834.1	1356	HD domain protein	15.237	13	3	8	3	267	29.6	8.27	11.73	3	0	0.848	0.715	0.268	0.914157	0.924507	0.123195	94.36	72.95	55.88	1.18144e+06	899075	283454	97.18	44.96	1.7	High	High	Peak Found	High	Peak Found	Not Found	Peak Found	High	High
AAS96987.1	2515	HD domain protein	46.443	22	8	43	8	351	40	8.25	61.64	8	0	1.198	0.654	0.525	0.765776	0.751887	0.438207	41.3	39.1	40.49	5.17878e+06	5.40358e+06	3.1797e+06	22.14	13.14	25.31	High	High	High	High	High	High	High	High	High
AAS96541.1	2068	HD domain protein	36.653	32	7	32	7	280	30.5	5.78	27.9	7	0	1.001	0.762	0.761	0.999866	0.921572	0.926726	59.52	51.8	69.91	1.92864e+06	1.84399e+06	1.45363e+06	27.32	26.72	36.61	High	High	High	High	High	High	High	High	High
AAS97023.1	2551	HD domain protein	12.986	9	3	13	3	411	45.1	6.01	5.25	3	0	1.473	2.055	1.426	0.816104	0.757586	0.943933	42.36	68.7	45.77	262031	358969	473356	26.21	20.33	12.15	High	High	Peak Found	High	Peak Found	Not Found	High	High	High
AAS97375.1	2903	HD domain protein	110.312	44	17	146	17	442	50.8	6.24	175.57	17	0	1.07	0.846	0.879	0.900092	0.937226	0.949735	45.94	60.37	46.39	1.86419e+07	1.85388e+07	1.44151e+07	17.64	2.95	16.64	High	High	High	High	High	High	High	High	High
AAS96830.1	2357	HD domain protein	27.439	18	5	19	5	369	39.4	5.88	24.87	5	0	0.626	0.574	1.027	0.357331	0.674147	0.999667	61.61	41.69	57.78	2.31597e+06	1.26575e+06	1.63793e+06	16.14	55.46	17.9	High	High	Peak Found	High	Peak Found	High	High	High	High
AAS95500.1	1020	HD domain/sensory box protein	205.978	46	30	244	30	701	76.4	6.05	364.82	30	0	0.951	1.004	1.048	0.984103	0.993965	0.997949	53.85	52.79	68.18	3.81104e+07	4.1692e+07	3.69955e+07	11.58	8.68	8.84	High	High	High	High	High	High	High	High	High
AAS96358.1	1882	HDIG domain protein	64.309	21	14	60	14	786	86.1	7.47	61.51	14	0	1.07	0.607	0.637	0.935944	0.676393	0.703786	56.57	44.53	52.6	5.11514e+06	4.80778e+06	3.22504e+06	9.77	26.75	12.56	High	High	High	High	High	High	High	High	High
AAS97143.1	2671	HDIG/HD/KH domain protein	182.699	53	32	192	32	519	58.2	6.18	302.6	32	0	0.88	1.201	1.281	0.915461	0.992001	0.978987	60.21	59.79	76.14	2.39804e+07	2.18506e+07	2.71852e+07	6.75	14.46	19.33	High	High	High	High	High	High	High	High	High
AAS95945.1	1467	heat shock protein HslVU, ATPase subunit HslU	51.782	26	11	75	11	441	50.1	5.5	76.34	11	0	1.368	0.914	0.824	0.366916	0.964364	0.908226	50.5	79.26	80.68	5.76402e+06	8.00551e+06	4.81988e+06	15.66	26.06	30.11	High	High	High	High	High	High	High	High	High
AAS97115.1	2643	heat shock protein HtpG	150.47	42	24	98	24	637	71.6	5.45	140.42	24	0	1.068	2.904	3.017	0.903323	0.143543	0.192281	47.19	43.97	44.38	7.949e+06	7.73563e+06	2.01449e+07	16.86	15.57	18.8	High	High	High	High	High	High	High	High	High
AAS96914.1	2442	heat shock protein, Hsp20 family	13.303	19	3	6	3	117	13	4.83	2.26	3	0	2.135	4.888	2.69	0.285658	0.0279678	0.345427	56.65	91.5	56.74	382551	519962	2.0895e+06	44.86	30.2	64.74	Peak Found	Peak Found	High	High	High	Not Found	High	High	Peak Found
AAS95138.1	657	heat shock protein, Hsp20 family	42.409	53	6	45	6	137	15.4	8.57	45.53	6	0	1.212	0.905	0.688	0.747365	0.971272	0.763948	53.3	70.79	49.3	3.94295e+06	4.99972e+06	3.38795e+06	9.3	21.45	23.96	High	High	High	High	High	High	High	High	High
AAS95949.1	1471	heat shock protein, Hsp20 family	22.778	15	3	23	3	142	15.7	5.38	40.06	3	0	1.135	0.734	0.674	0.900092	0.885756	0.794732	26.48	30.64	29.65	2.51232e+06	2.89634e+06	1.97186e+06	15.36	11.24	18.29	High	High	High	High	High	High	High	High	High
AAS96913.1	2441	heat shock protein, Hsp20 family	14.344	17	3	10	3	136	15.4	8.46	14.75	3	0	0.566	0.681	1.324	0.312822	0.870104	0.950814	85.21	60.82	69.08	1.29747e+06	940819	1.11532e+06	17.35	38.77	31.5	High	Peak Found	High	High	High	Peak Found	High	High	Peak Found
AAS95375.1	895	helicase, RecD/TraA family	36.183	15	9	30	9	742	82.5	7.06	23.47	9	0	0.949	0.713	0.649	0.96948	0.844711	0.737876	55.53	53.25	36.2	4.75798e+06	3.05877e+06	3.13451e+06	16.55	25.08	24.96	High	High	High	High	High	Not Found	High	High	High
AAS97637.1	3167	heme biosynthesis protein, putative	37.114	36	4	25	4	160	18.4	6.14	20.33	4	0	2.048	6.331	2.573	0.200877	0.00248752	0.377573	91.92	88.77	31.48	503491	1.13673e+06	3.2083e+06	75.48	15.79	22.09	High	High	High	High	High	Peak Found	High	High	High
AAS95492.1	1012	hemolysin-type calcium-binding repeat protein	507.899	33	72	635	72	3038	316.2	4.27	736.26	72	0	1.015	0.829	0.849	0.953718	0.925683	0.925947	70.49	86.84	82.11	1.09746e+08	1.22551e+08	9.74504e+07	9.43	36.84	44.81	High	High	High	High	High	High	High	High	High
AAS96023.1	1545	hemolysin-type calcium-binding repeat/calx-beta domain protein	44.699	7	11	16	11	2414	246.9	4.44	9.44	11	0	1.292	2.675	1.589	0.882562	0.368415	0.864178	23.38	105.19	91.98	431606	546259	1.12573e+06	19.9	9.9	27.01	Peak Found	High	Peak Found	Peak Found	High	Not Found	High	High	Peak Found
AAS95535.1	1055	heptosyltransferase family protein	10.992	6	2	9	2	344	38	8.09	16.66	2	0	0.816	0.914	1.406	0.879583	0.992001	0.945273	43.87	62.72	60.12	525890	528437	373980	12.41	50.33	20.35	High	High	High	High	High	High	High	High	High
AAS95942.1	1464	heptosyltransferase family protein	21.339	14	6	15	6	411	44.6	7.24	13.59	6	0	0.995	1.405	0.972	0.996749	0.947727	0.997949	36.23	96.51	90.56	874934	603343	1.08703e+06	7.59	11.05	34.96	High	High	Peak Found	High	High	Not Found	High	High	High
AAS95478.1	998	heptosyltransferase family protein	32.181	23	7	26	7	351	39.5	7.87	42.95	7	0	1.003	0.924	1.064	0.996749	0.992001	0.999667	46.26	42.93	39.94	2.28344e+06	2.1174e+06	2.02857e+06	7.82	8.49	9.96	High	High	High	High	High	Peak Found	High	High	High
AAS95860.1	1382	HesB family selenoprotein	15.806	33	4	11	4	107	11.4	4.59	11.83	4	0	2.04	1.893	0.939	0.163452	0.738971	0.997848	29.07	32.46	35.83	821350	1.1878e+06	1.46269e+06	47.22	25.09	15.4	Peak Found	High	High	High	Peak Found	Not Found	High	High	High
AAS96875.1	2402	heterodisulfide reductase, A subunit	100.387	38	20	82	20	652	70.9	6.87	100.09	20	0	1.325	1.795	1.774	0.498061	0.729877	0.7713	44.38	47.72	73.35	4.52685e+06	4.86685e+06	9.81555e+06	14.46	14.83	6.22	High	High	High	High	High	High	High	High	High
AAS96876.1	2403	heterodisulfide reductase, B subunit	20.252	21	4	13	4	334	35.1	6.52	6.41	4	0	1.639	3.324	2.691	0.667389	0.205893	0.397368	32.92	24.1	56.01	289653	462214	1.15521e+06	4	5.75	18.65	Peak Found	High	High	High	Peak Found	Not Found	High	High	High
AAS96877.1	2404	heterodisulfide reductase, C subunit	29.087	33	6	29	6	186	21	8.35	56.21	6	0	1.966	1.996	0.734	0.0139629	0.570908	0.812714	105.99	72.44	49.84	2.34244e+06	4.59766e+06	4.39254e+06	48.39	34.44	21.04	High	High	High	High	High	High	High	High	High
AAS95329.1	849	heterodisulfide reductase, iron-sulfur-binding subunit, putative	490.57	65	47	1393	47	758	82.2	4.92	2282.73	47	0	0.881	1.207	1.365	0.917344	0.992001	0.9541	56.09	63.44	58.94	2.94567e+08	2.71273e+08	3.38733e+08	17	10.93	25.48	High	High	High	High	High	High	High	High	High
AAS95328.1	848	heterodisulfide reductase, putative	331.161	67	29	711	29	412	44.6	8.25	1242.8	29	0	0.807	1.164	1.311	0.747365	0.993965	0.972027	60.5	53.52	55.31	1.73895e+08	1.64567e+08	2.08165e+08	15.11	21.94	8.43	High	High	High	High	High	High	High	High	High
AAS95330.1	850	heterodisulfide reductase, transmembrane subunit, putative	123.928	35	15	354	15	384	42.6	9.35	452.29	15	0	0.818	1.138	1.176	0.777515	0.993965	0.997848	67.89	72.33	77.15	7.62007e+07	7.13577e+07	7.91932e+07	11.82	28.1	13.92	High	High	High	High	High	High	High	High	High
AAS95164.1	683	hflC protein, putative	98.405	57	15	128	15	283	32.2	9.51	205.4	15	0	0.962	1.173	1.171	0.997806	0.993965	0.997949	54.35	68.25	64.88	2.39403e+07	2.23672e+07	2.1832e+07	25.23	13.26	11.19	High	High	High	High	High	High	High	High	High
AAS95165.1	684	hflK protein, putative	131.945	52	19	177	19	378	42.5	6.86	248.86	19	0	0.898	1.098	1.141	0.938474	0.993965	0.998377	48.24	48.78	58.14	2.77655e+07	2.63402e+07	2.51826e+07	5.93	2.6	3.11	High	High	High	High	High	High	High	High	High
AAS95029.1	547	high-affinity branched chain amino acid ABC transporter, periplasmic branched chain amino acid-binding protein	165.825	70	20	166	20	372	39.6	8.44	289.06	20	0	1.258	3.9	2.792	0.523044	0.0264381	0.265384	66.23	65.02	66.69	1.55134e+07	2.00871e+07	4.74299e+07	3.89	15.66	13.1	High	High	High	High	High	High	High	High	High
AAS95033.1	551	high-affinity branched-chain amino acid ABC transporter ATP-binding protein	55.914	31	6	44	6	234	25.7	5.69	82.61	6	0	0.771	0.653	0.823	0.686217	0.722096	0.898811	68.15	42.48	48	7.23279e+06	6.05882e+06	5.09855e+06	31.41	19.06	8.52	High	High	High	High	High	High	High	High	High
AAS95032.1	550	high-affinity branched-chain amino acid ABC transporter, ATP binding protein	44.601	35	10	61	10	262	29.3	6.15	55.7	10	0	0.842	0.643	0.743	0.832815	0.706052	0.833374	51.29	48.41	42.26	1.17597e+07	7.59e+06	5.29739e+06	35.34	27.59	5.34	High	High	High	High	High	High	High	High	High
AAS97212.1	2740	high-affinity branched-chain amino acid ABC transporter, ATP-binding protein	15.2	24	4	10	4	241	26.4	5.68	8.14	4	0	0.104	0.633	5.521	9.8361e-15	0.740049	0.0246461	482.76	51.66	487.91	3.06634e+06	264402	1.57242e+06	25.66	12.42	21.87	High	High	Peak Found	High	High	Not Found	Peak Found	High	High
AAS97216.1	2744	high-affinity branched-chain amino acid ABC transporter, perisplasmic amino acid binding protein	75.608	51	13	49	13	385	41.9	6.05	52.8	13	0	1.855	3.948	1.847	0.0564791	0.0276512	0.764811	55.49	62.48	72.03	1.83136e+06	3.59882e+06	6.55229e+06	28.26	5.13	17.13	High	High	High	High	High	High	High	High	High
AAS95018.1	536	high-molecular-weight cytochrome C	35.568	15	8	26	8	560	60.7	8.53	30.3	8	0	0.946	0.264	0.404	0.966597	0.0207009	0.197169	96.08	68.5	71.95	5.14205e+06	5.06888e+06	1.6962e+06	21.62	56.8	32.46	High	High	High	High	High	High	High	High	High
AAS95276.1	796	histidinol dehydrogenase	36.976	19	7	46	7	436	46.1	5.3	60.74	7	0	1.119	1.225	1.118	0.898766	0.968524	0.999667	84.97	70.25	71.44	3.24209e+06	3.57257e+06	4.16412e+06	16.94	16.36	22.21	High	High	High	High	High	High	High	High	High
AAS96962.1	2490	histidinol phosphatase, putative	12.291	11	3	18	3	274	31	5.86	24.7	3	0	0.914	0.886	1.054	0.942506	0.964364	0.99805	56.82	43.32	84.47	3.56659e+06	1.7216e+06	3.65036e+06	40.37	36.57	38.51	High	High	High	High	High	Peak Found	High	High	High
AAS95509.1	1029	histidinol-phosphate aminotransferase	40.38	23	8	50	8	373	41.2	5.87	45.38	8	0	1.272	1.449	0.945	0.616511	0.901395	0.969446	77.32	74.44	46.28	5.20728e+06	4.93741e+06	4.88597e+06	102.63	24.03	7.16	High	High	High	High	High	High	High	High	High
AAS97837.1	3368	histidyl-tRNA synthetase	71.601	40	13	53	13	417	45.6	7.08	63.14	13	0	1.531	2.566	1.436	0.208461	0.247574	0.949043	51.6	68.45	56.83	2.92507e+06	4.96551e+06	5.52085e+06	27.68	9.04	46.53	High	High	High	High	High	High	High	High	High
AAS96612.1	2139	histone deacetylase family protein	30.999	19	7	32	7	439	49.2	5.73	26.46	7	0	0.807	1.083	1.31	0.824746	0.993965	0.961158	62.4	51.73	57.85	1.84621e+06	1.54047e+06	2.26801e+06	23.25	5.45	8.59	High	High	High	High	High	Not Found	High	High	High
AAS95017.1	535	hmc operon protein 2	109.988	38	16	128	16	370	40	7.23	180.8	16	0	0.917	0.221	0.278	0.953718	0.00261892	0.02742	68.23	57.97	64.02	2.12176e+07	1.7977e+07	4.42368e+06	16.62	11.92	14.62	High	High	High	High	High	High	High	High	High
AAS95016.1	534	hmc operon protein 3	7.543	6	2	7	2	388	43.1	8.4	0	2	0	1.749	0.767	0.438	0.34773	0.949306	0.513039	43.17	19.43	43.17	784160	1.37164e+06	601091	17.25	38.09	24.89	High	High	High	High	High	High	High	Peak Found	Peak Found
AAS95013.1	531	hmc operon protein 6	74.805	31	13	93	13	461	52.7	5.85	100.8	13	0	0.915	0.41	0.369	0.952049	0.162883	0.125442	58.06	69.84	69.8	4.48629e+07	2.12972e+07	1.96099e+07	49.45	12.18	21.92	High	High	High	High	High	High	High	High	High
AAS94881.1	398	HMGL-like domain protein	163.542	41	26	196	26	608	69.3	5.63	298.47	26	0	1.038	1.121	1.023	0.938474	0.993965	0.996246	61.84	57.59	54.71	3.06961e+07	3.65292e+07	3.67174e+07	26.39	9.86	13.08	High	High	High	High	High	High	High	High	High
AAS96729.1	2256	Holliday junction DNA helicase RuvA	19.135	33	4	9	4	202	21.5	5.91	15.24	4	0	1.162	0.741	0.638	0.929563	0.928503	0.836097	34.52	45	30.32	856514	995221	805122	32.43	8.13	22.89	Peak Found	High	High	High	Peak Found	High	High	High	High
AAS96728.1	2255	Holliday junction DNA helicase RuvB	34.072	24	7	27	7	320	35.1	6.34	24.5	7	0	1.026	0.736	0.624	0.971674	0.870104	0.712365	52.62	46.09	70.31	3.57925e+06	4.21073e+06	1.82841e+06	18.77	16.75	15.14	High	High	High	High	High	High	High	High	High
AAS95370.1	890	homoserine dehydrogenase	52.571	25	9	39	9	424	45.5	5.95	60.47	9	0	1.503	1.982	1.511	0.11571	0.568417	0.896116	86.59	48.46	63.62	3.30379e+06	1.31918e+07	1.53519e+07	41.41	4.97	10.72	High	High	High	High	High	High	High	High	High
AAS94826.1	343	HPCH/HPAI aldolase family protein	80.825	52	10	61	10	260	28.4	6.11	90.98	10	0	0.973	1.147	1.235	0.99509	0.993965	0.984176	54.8	58.66	53.3	1.05707e+07	7.03558e+06	1.03117e+07	24.2	31.83	26.11	High	High	High	High	High	High	High	High	High
AAS95909.1	1431	hpt domain protein/STAS domain protein	41.325	12	7	29	7	731	76.2	4.41	28.5	7	0	0.689	0.715	1.037	0.354352	0.833416	0.997848	52.22	48.13	64.54	5.11104e+06	3.66021e+06	3.56385e+06	19.93	30.77	5.07	High	High	High	High	High	Peak Found	High	High	High
AAS97015.1	2543	hybrid cluster protein	175.98	54	24	193	24	566	60.9	6.48	326.18	24	0	0.941	2.794	3.299	0.971674	0.170444	0.129289	80.48	90.95	65.45	2.35337e+07	2.08231e+07	5.83208e+07	69.65	6.15	47.55	High	High	High	High	High	High	High	High	High
AAS96488.1	2013	hybrid cluster protein	164.356	50	25	169	25	553	59.9	5.62	250.79	25	0	1.175	2.657	1.796	0.7061	0.209275	0.763948	54.72	72.68	56.15	3.8095e+07	3.79131e+07	4.95244e+07	33.45	7.28	23.98	High	High	High	High	High	High	High	High	High
AAS96713.1	2240	hydantoinase/oxoprolinase family protein	98.126	35	14	78	14	550	58.4	5.52	122.35	14	0	1.133	1.426	1.445	0.824746	0.924507	0.925947	54.72	49.46	55.93	6.808e+06	7.10619e+06	8.37819e+06	20.53	11.44	19.05	High	High	High	High	High	High	High	High	High
AAS94513.1	29	hydantoinase/oxoprolinase family protein	47.509	27	10	25	10	570	58.6	5.85	20.27	10	0	1.489	1.484	1.076	0.49816	0.897678	0.999667	56.06	60.02	51.88	1.75795e+06	2.08205e+06	2.03005e+06	19.61	10.19	14.45	High	High	High	High	High	High	High	High	High
AAS96802.1	2329	hydrogenase accessory protein HypB	52.855	37	8	64	8	224	24.9	5.01	91.09	8	0	0.87	0.991	1.078	0.898766	0.993965	0.998377	56.41	38.35	62.39	8.12756e+06	8.34206e+06	9.11505e+06	20.38	15.86	9.37	High	High	High	High	High	High	High	High	High
AAS96399.1	1923	hydrogenase expression/formation protein HupD	7.529	18	2	6	2	165	17.9	4.5	1.64	2	0	2.772	0.499	0.216	0.0595257	0.664095	0.063157	32.98	46.55	20.49	390136	807044	244880	26.85	13.19	21.69	Peak Found	High	High	Peak Found	High	Not Found	High	Peak Found	High
AAS94808.1	325	hydrogenase expression/formation protein HypD	28.534	24	7	22	7	365	39.4	6.32	28.62	7	0	0.929	1.408	1.48	0.952046	0.915515	0.915503	71.38	45.93	42.62	3.82327e+06	2.65809e+06	4.51087e+06	12.21	25.8	30.95	Peak Found	High	High	High	High	High	High	High	High
AAS94809.1	326	hydrogenase expression/formation protein HypE	37.176	28	8	38	8	341	35.9	5.24	21.7	8	0	1.405	0.738	0.535	0.263764	0.846182	0.488578	47.77	59.51	58.85	6.48844e+06	8.26508e+06	5.72193e+06	34.13	28.6	1.65	High	High	High	High	High	High	High	High	High
AAS96765.1	2292	hydrogenase nickel insertion protein HypA	6.741	15	2	10	2	120	12.7	4.93	3.93	2	0	0.758	1.534	0.262	0.652156	0.870056	0.0540404	15.4	479.35	16.65	2.92696e+06	2.15244e+06	1.57156e+06	25.06	6.83	11.58	High	High	High	High	High	High	High	High	High
AAS96801.1	2328	hydrogenase nickel insertion protein HypA, putative	17.898	41	4	17	4	117	12.9	4.64	22.28	4	0	1.311	1.191	1.075	0.787529	0.993965	0.997949	35.1	78.49	90.99	1.17163e+06	1.53845e+06	1.02335e+06	5.36	24.52	31.44	High	High	High	High	High	High	High	High	High
AAS96874.1	2401	hydrogenase, iron-sulfur cluster-binding subunit, putative	83.7	47	17	108	17	494	54.1	7.06	101.64	17	0	1.298	1.669	1.35	0.419067	0.790242	0.963271	77.27	81.72	75.27	1.89061e+07	1.44283e+07	1.63709e+07	6.8	7.53	2.52	High	High	High	High	High	High	High	High	High
AAS96873.1	2400	hydrogenase, putative	56.72	38	10	59	10	360	39.4	7.28	56.91	10	0	1.548	2.474	1.701	0.212734	0.272372	0.833374	73.4	66.22	71.52	3.38723e+06	3.56121e+06	6.89412e+06	7.37	37.6	21.32	High	High	High	High	High	High	High	High	High
AAS96872.1	2399	hydrogenase, putative	30.429	29	6	23	6	295	32.2	5.38	23.3	6	0	1.007	0.856	0.856	0.999866	0.966741	0.976855	57.9	68.27	52.82	1.68038e+06	1.31885e+06	1.1278e+06	36.47	13.89	13.49	High	High	Peak Found	High	High	Not Found	High	High	High
AAS95123.1	642	hydrolase, alpha/beta fold family	23.685	20	5	20	5	270	29.8	6.73	26.73	5	0	1.457	0.946	0.582	0.307384	0.993965	0.616353	59.96	49.77	68.57	2.23689e+06	6.15161e+06	1.73697e+06	13.89	26.74	38.15	High	High	High	High	High	High	High	High	Peak Found
AAS94821.1	338	hydrolase, haloacid dehalogenase-like family	23.44	23	4	18	4	213	23.3	4.94	21.98	4	0	1.35	1.165	0.806	0.748453	0.993965	0.953073	40.09	54.05	46.83	1.11576e+06	1.37848e+06	1.4985e+06	36.87	11.73	38.58	High	High	High	High	High	High	High	High	High
AAS94539.1	55	hydroxymethylbutenyl pyrophosphate reductase	17.997	17	4	12	4	290	31.5	5.86	12.64	4	0	0.992	1.097	1.78	0.996128	0.993965	0.833374	32.15	107.16	59.27	438901	322667	468824	26	20.39	50.95	Peak Found	High	High	Peak Found	High	Not Found	High	High	High
AAS95245.1	765	hydroxypyruvate reductase, putative	47.545	22	8	26	8	454	47.6	5.86	26.97	8	0	0.573	1.001	1.301	0.290644	0.993965	0.953073	29.18	93.13	71.67	1.74304e+06	895336	1.5551e+06	12.29	7.67	21.37	High	High	High	High	High	High	High	High	High
AAS94453.1	A0146	hypothetical protein	30.81	51	6	14	6	156	16.3	4.77	20.92	6	0	0.614	3.479	4.78	0.583376	0.139521	0.0356256	97.98	60.84	76.28	626617	321149	2.44719e+06	37.91	48.83	27.89	Peak Found	Peak Found	High	High	Peak Found	Peak Found	High	High	High
AAS95290.1	810	hypothetical protein	84.346	29	14	41	14	686	74.6	8.15	54.93	14	0	1.642	6.173	4.091	0.457608	0.001099	0.0429204	50.64	57.36	51.65	934667	1.33506e+06	6.3509e+06	7.28	6.38	11.86	High	High	Peak Found	High	Peak Found	Not Found	High	High	High
AAS97189.1	2717	hypothetical protein	13.461	30	4	11	4	275	30.3	5.22	2.37	4	0	0.827	1.941	4.671	0.912303	0.722096	0.0567018	41.55	60.12	49.77	485135	79076.3	1.13101e+06	6.65	35.96	13.33	Peak Found	High	Peak Found	High	Peak Found	Not Found	High	High	High
AAS95853.1	1375	hypothetical protein	11.827	36	3	14	3	76	9	7.4	17.97	3	0	0.521	1.844	3.833	0.145658	0.717955	0.0777263	68.96	83.06	115.41	1.39162e+06	2.09675e+06	2.58131e+06	54.51	10.85	53.49	High	High	High	High	High	High	Peak Found	High	High
AAS95221.1	741	hypothetical protein	13.223	21	2	14	2	158	17.3	8.4	18.97	2	0	1.74	0.613	0.31	0.177275	0.781859	0.131765	68.72	59.3	60.42	1.96617e+06	2.5295e+06	1.083e+06	21.15	6.05	20.76	High	High	High	High	High	High	High	High	High
AAS97469.1	2998	hypothetical protein	47.291	26	11	40	11	444	48.7	5.96	50.94	11	0	0.992	0.457	0.444	0.971674	0.273646	0.27376	65.01	51.63	55.3	6.51538e+06	8.5688e+06	2.68964e+06	72.85	7.74	18.91	High	High	High	High	High	High	High	High	High
AAS96362.1	1886	hypothetical protein	14.047	16	3	9	3	225	25.1	5.6	3.63	3	0	0.416	2.227	2.784	0.00455733	0.45295	0.300643	93.06	80.85	93.7	2.89268e+06	1.83731e+06	3.2891e+06	79.17	85.24	23.95	Peak Found	High	High	High	Peak Found	Peak Found	High	High	High
AAS97588.1	3117	hypothetical protein	13.181	14	3	15	3	194	22.3	8.98	14.41	3	0	0.614	1.914	2.704	0.497526	0.707245	0.349769	46.48	60.17	43.03	880320	789056	1.81197e+06	37.89	23.02	56.84	High	High	Peak Found	High	High	Not Found	High	High	High
AAS94630.1	146	hypothetical protein	26.862	28	6	29	6	269	29.3	5.52	27.44	6	0	1.102	0.595	0.475	0.914489	0.664095	0.375194	57.64	39.71	54.45	3.47004e+06	3.9486e+06	2.06183e+06	22.5	6.54	7.67	High	High	High	High	High	High	High	High	High
AAS96785.1	2312	hypothetical protein	11.004	17	2	9	2	155	16.6	4.37	6.6	2	0	1.152	0.649	0.381	0.942506	0.846672	0.426726	97.43	39.68	50.08	745691	536771	490162	47.7	43.44	19.33	Peak Found	High	High	High	Peak Found	High	Peak Found	High	High
AAS97435.1	2964	hypothetical protein	28.868	26	4	24	4	219	23.3	5.86	31.4	4	0	1.755	1.007	0.47	0.276248	0.993965	0.530068	50.34	60.53	68.79	1.35392e+06	2.04809e+06	1.35655e+06	6.41	13.17	42.57	High	High	High	High	High	Peak Found	High	High	High
AAS96932.1	2460	hypothetical protein	39.564	34	5	29	5	197	22.3	4.83	39.69	5	0	1.072	2.29	2.132	0.96174	0.44478	0.598534	42.8	67.15	58.67	1.62869e+06	1.80701e+06	3.92319e+06	43.34	30.43	3.94	High	High	High	High	High	High	High	High	High
AAS96356.1	1880	hypothetical protein	35.149	43	6	27	6	213	22.6	9.09	16.96	6	0	1.316	0.519	0.5	0.677443	0.56252	0.614779	75.79	46.07	51.01	2.5285e+06	2.116e+06	1.21807e+06	36.6	53.41	93.92	High	High	High	High	High	High	High	High	Peak Found
AAS96104.1	1626	hypothetical protein	26.631	34	6	17	6	214	23.2	8.13	18.02	6	0	0.897	2.091	2.013	0.942506	0.624141	0.654718	44.81	53.06	66.31	1.1447e+06	1.13995e+06	1.93376e+06	9.32	31.92	3.08	Peak Found	High	High	High	High	Peak Found	High	High	High
AAS96601.1	2128	hypothetical protein	14.125	26	2	9	2	164	17.3	6.11	4.43	2	0	1.083	2.287	2.112	0.971674	0.573373	0.661819	38.22	33.94	23.52	482550	505781	1.11195e+06	5.65	37.62	45.3	High	Peak Found	Peak Found	Peak Found	High	Not Found	High	High	High
AAS97156.1	2684	hypothetical protein	16.578	12	3	16	3	290	31.2	7.9	14.84	3	0	0.714	0.465	0.545	0.587389	0.44565	0.689628	57.29	38.57	48.89	2.53749e+06	1.97534e+06	1.0587e+06	40.66	4.7	18.99	High	High	High	High	High	High	High	High	High
AAS94789.1	306	hypothetical protein	20.828	23	5	12	5	205	22.3	8.84	12.21	5	0	0.962	0.605	0.54	0.971674	0.737548	0.689639	54.76	87.33	71.12	2.54179e+06	2.10856e+06	1.14151e+06	20.02	135.13	39.56	Peak Found	High	Peak Found	High	Peak Found	High	High	High	High
AAS94724.1	240	hypothetical protein	30.799	38	7	36	7	165	18.9	8.18	25.26	7	0	0.656	1.316	1.904	0.280136	0.953611	0.717654	32.1	53.98	40.41	4.29188e+06	2.23559e+06	5.72635e+06	13.28	36.2	29.5	High	High	High	High	High	Peak Found	High	High	High
AAS95507.1	1027	hypothetical protein	14.517	12	4	8	4	323	34.3	4.89	9.63	4	0	1.38	1.278	1.993	0.750758	0.966741	0.717654	102.44	71.39	82.78	1.09039e+06	551866	1.19701e+06	70.33	4.71	28.31	Peak Found	High	High	High	Peak Found	Not Found	Peak Found	High	High
AAS95912.1	1434	hypothetical protein	10.363	21	3	13	3	121	13.1	6.07	16.53	3	0	1.071	2.242	1.97	0.971674	0.568417	0.72541	57.75	60.03	61.71	600380	525576	1.13615e+06	49.53	22.36	28.38	High	High	High	High	High	Not Found	High	High	High
AAS96059.1	1581	hypothetical protein	30.05	31	4	27	4	116	12.9	9.14	45.78	4	0	1.246	0.729	0.662	0.669135	0.867179	0.743163	60.58	71.98	28.38	4.62585e+06	4.5498e+06	2.88413e+06	35.01	12.25	23.5	High	High	High	High	High	High	High	High	High
AAS97112.1	2640	hypothetical protein	21.686	28	5	20	5	246	27	6.29	12.28	5	0	1.134	2.47	1.817	0.944842	0.448986	0.743163	17.86	51.62	63.63	768071	822983	1.64445e+06	17.15	11.11	6.03	High	High	Not Found	High	High	Not Found	High	High	High
AAS97124.1	2652	hypothetical protein	32.059	39	7	40	7	193	22.7	6.58	51.43	7	0	0.881	0.857	0.67	0.917344	0.94918	0.752226	68.02	101.45	77.52	8.7929e+06	8.58627e+06	5.61526e+06	47.68	14.42	13.05	High	High	High	High	High	High	High	High	High
AAS96303.1	1826	hypothetical protein	20.638	39	3	21	3	90	9.6	9.32	23.03	3	0	0.599	0.35	0.619	0.139795	0.1192	0.762056	79.17	30.58	46.67	3.74741e+06	2.74474e+06	1.39669e+06	29.32	20.95	12.07	High	High	High	High	High	High	High	High	High
AAS94975.1	493	hypothetical protein	20.915	30	3	26	3	102	11.1	5.21	36.11	3	0	0.824	1.277	1.774	0.866809	0.960391	0.762056	49.42	50.94	32.93	1.57163e+06	1.28235e+06	2.20124e+06	47.95	29.82	30.23	High	High	High	High	High	High	High	High	High
AAS95655.1	1177	hypothetical protein	26.963	27	5	26	5	220	23.9	6.3	36.82	5	0	0.877	0.814	0.66	0.900092	0.930904	0.762056	51.46	62.26	84.04	3.07892e+06	3.26303e+06	2.49439e+06	12.16	30.28	37.59	High	High	High	High	High	High	High	High	High
AAS97744.1	3274	hypothetical protein	39.352	32	7	66	7	222	24.5	6.54	111.05	7	0	0.91	0.668	0.683	0.949811	0.738834	0.763948	45.24	56.87	44.72	1.1469e+07	1.12855e+07	7.99386e+06	34.67	11.54	6.59	High	High	High	High	High	High	High	High	High
AAS95222.1	742	hypothetical protein	54.829	42	11	50	11	278	30.9	6.54	67.64	11	0	0.939	0.501	0.683	0.971674	0.362382	0.763948	49.7	45.03	63.62	9.25588e+06	7.62777e+06	9.9563e+06	14.71	8.38	9.37	High	High	High	High	High	High	High	High	High
AAS96697.1	2224	hypothetical protein	31.793	28	6	42	6	216	24.4	6.07	52.78	6	0	0.778	0.58	0.721	0.666414	0.552929	0.7971	59.41	44.32	52.04	6.38927e+06	5.1344e+06	3.98656e+06	19.14	25.9	24.84	High	High	High	High	High	High	High	High	High
AAS96319.1	1843	hypothetical protein	44.923	27	7	42	7	317	34	4.65	31.79	7	0	0.892	0.966	0.724	0.920602	0.993965	0.80279	45.95	91.67	52.11	4.79951e+06	5.165e+06	4.1457e+06	17.35	11.15	11.78	High	High	High	High	High	High	High	High	High
AAS95525.1	1045	hypothetical protein	27.572	35	6	45	6	198	21.7	6.54	56.19	6	0	0.831	0.622	0.714	0.814027	0.660987	0.803286	73.47	58.7	83.02	1.33899e+07	1.28753e+07	6.77327e+06	6.12	23.96	7.37	High	High	High	High	High	High	High	High	High
AAS95837.1	1359	hypothetical protein	16.493	9	4	11	4	427	47.7	9.51	10.1	4	0	1.001	1.904	1.648	0.997497	0.706052	0.815195	87.41	78.52	106.91	1.51486e+06	1.55214e+06	1.82197e+06	15.71	57.67	34.2	Peak Found	Peak Found	High	High	High	High	High	High	Peak Found
AAS96134.1	1657	hypothetical protein	13.963	25	4	25	4	99	11.4	7.85	12	4	0	0.831	1.489	1.702	0.816104	0.891644	0.821751	45.65	95.46	87.99	3.78922e+06	3.15897e+06	3.92525e+06	12.71	3.36	19.65	High	High	High	High	High	High	High	High	High
AAS94520.1	36	hypothetical protein	9.857	21	2	14	2	151	16	6.67	9.73	2	0	0.945	0.52	0.615	0.96948	0.65788	0.821751	37.97	53.6	41.94	1.03212e+06	752968	546084	34.87	35.34	16.85	High	High	High	High	High	High	High	High	Peak Found
AAS94445.1	A0003	hypothetical protein	23.465	17	7	12	7	1131	116.2	5.78	4.41	7	0	1.017	0.945	1.696	0.994127	0.993965	0.821751	64.96	94.32	52.67	1.56635e+06	592460	1.28415e+06	24.74	27.93	41.39	High	High	Peak Found	High	Peak Found	Peak Found	High	High	High
AAS97687.1	3217	hypothetical protein	49.235	75	7	36	7	142	15.3	4.73	54.99	7	0	0.869	1.58	1.686	0.918347	0.845157	0.829128	65.07	75.07	60.22	1.97534e+06	1.00864e+06	4.10764e+06	20.2	42.26	19.27	High	High	High	High	High	Peak Found	High	High	High
AAS95339.1	859	hypothetical protein	28.989	21	7	34	7	491	52.4	6.92	33.47	7	0	1.362	1.136	0.737	0.517711	0.993965	0.833374	41.75	39.03	47.18	2.93697e+06	3.4752e+06	3.10721e+06	16.4	4.41	17.45	High	High	High	High	High	High	High	High	High
AAS94745.1	262	hypothetical protein	27.019	35	5	20	5	184	20.1	5.14	20.96	5	0	1.332	2.384	1.659	0.616511	0.35696	0.835836	56.3	80.75	46.7	2.72247e+06	2.60596e+06	3.88698e+06	31.04	13.48	17.87	High	High	High	High	High	High	High	High	High
AAS96578.1	2105	hypothetical protein	92.978	48	7	191	7	170	16.7	11.06	374.21	7	0	1.16	0.864	0.756	0.735742	0.949453	0.845283	44.56	93.92	83.42	3.12306e+07	3.47355e+07	2.58154e+07	10.59	15.61	74.41	High	High	High	High	High	High	High	High	High
AAS97660.1	3190	hypothetical protein	132.221	50	23	218	23	555	61	6.06	274.18	23	0	0.978	1.716	1.596	0.985566	0.751887	0.863088	56.8	55.71	72.96	1.77318e+07	2.06442e+07	3.34503e+07	12.46	42.21	30.44	High	High	High	High	High	High	High	High	High
AAS97468.1	2997	hypothetical protein	21.698	21	5	14	5	258	28.5	5.6	17.48	5	0	0.868	0.609	0.725	0.900092	0.722096	0.880462	35.9	51.45	67.81	2.53099e+06	2.23485e+06	1.64124e+06	13.85	6.76	40.98	High	High	High	High	High	High	High	Peak Found	High
AAS95169.1	688	hypothetical protein	8.632	16	2	5	2	166	18	8.22	1.66	2	0	0.76	0.934	1.645	0.855312	0.992001	0.885065	100.42	92.11	53.12	422582	387695	288829	40.72	52.27	10.35	High	Peak Found	High	Peak Found	High	Not Found	Peak Found	Peak Found	High
AAS97219.1	2747	hypothetical protein	50.138	12	11	37	11	1014	115.9	8.91	35.22	11	0	1.225	0.857	0.788	0.777515	0.953611	0.890566	29.2	53.04	53.99	2.40305e+06	3.1891e+06	2.86598e+06	26.27	8.51	27.51	High	High	High	High	High	Not Found	High	High	High
AAS94757.1	274	hypothetical protein	5.222	26	2	6	2	123	13.9	4.13	0	2	0	0.533	0.847	1.62	0.423198	0.964364	0.896116	44.84	42.19	34.87	543915	283072	445672	20.2	26.18	28.57	High	High	High	High	High	Peak Found	Peak Found	Peak Found	High
AAS94749.1	266	hypothetical protein	106.813	36	14	166	14	418	46.2	4.83	325.43	14	0	1.16	2.089	1.513	0.735598	0.49649	0.896116	59.65	53.3	63.22	4.27846e+07	4.87767e+07	8.43603e+07	12.08	14.28	6.87	High	High	High	High	High	High	High	High	High
AAS94882.1	399	hypothetical protein	14.365	15	3	8	3	262	29.8	6.68	9.14	3	0	0.963	0.533	0.708	0.971674	0.647543	0.896116	52.65	49.02	66.05	1.55209e+06	1.09072e+06	1.0548e+06	24.2	2.31	14.52	High	High	High	High	High	Not Found	Peak Found	High	High
AAS96428.1	1952	hypothetical protein	123.245	61	11	132	11	231	23.8	5.41	209.73	11	0	0.94	0.682	0.802	0.971674	0.761576	0.896116	64.69	50.74	60.38	9.58555e+07	1.10758e+08	1.59119e+07	63.04	65.87	5.18	High	High	High	High	High	High	High	High	High
AAS95654.1	1176	hypothetical protein	10.512	29	4	10	4	185	20.5	4.86	0	4	0	0.954	1.544	1.44	0.971674	0.886489	0.913261	48.95	53.65	48.86	614633	350553	943515	31.93	17.36	16.48	Peak Found	High	Peak Found	High	High	Peak Found	High	High	High
AAS95848.1	1370	hypothetical protein	38.755	31	6	30	6	290	31	4.81	23.99	6	0	1.334	1.176	0.807	0.623627	0.993965	0.921499	56.63	57.86	63.56	2.49635e+06	2.4202e+06	2.40635e+06	7.3	12.76	25.88	High	High	High	High	High	High	High	High	High
AAS94496.1	12	hypothetical protein	56.148	28	7	49	7	400	43.1	5.66	50.22	7	0	1.248	1.067	0.846	0.606826	0.997631	0.925459	47.44	66.71	51.91	6.12371e+06	7.74022e+06	5.66895e+06	42.2	5.34	1.66	High	High	High	High	High	High	High	High	High
AAS97695.1	3225	hypothetical protein	14.846	29	5	12	5	140	16.2	7.44	13.49	5	0	1.155	0.778	0.74	0.932481	0.950679	0.925459	58.84	39.19	38.24	970876	901451	724835	42.42	12.51	3.04	High	High	Peak Found	High	High	Not Found	High	High	High
AAS96931.1	2459	hypothetical protein	29.379	31	6	23	6	204	23.9	6.27	12.97	6	0	1.294	0.903	0.766	0.747365	0.982819	0.9359	53.07	37.5	54.81	2.64227e+06	1.49314e+06	1.26879e+06	17.86	24.83	20.13	High	High	High	High	High	Peak Found	High	High	High
AAS94963.1	480	hypothetical protein	20.921	21	4	20	4	243	26.3	5.26	12.53	4	0	0.715	0.72	0.767	0.62852	0.895298	0.945517	81.19	55.43	51.73	2.66177e+06	718118	721460	51.74	25.04	27.2	High	High	High	High	High	High	High	High	High
AAS96524.1	2051	hypothetical protein	22.499	12	4	15	4	432	50.7	9.5	16.51	4	0	1.429	1.584	1.314	0.703983	0.870104	0.950814	40.9	48.83	18.46	878790	1.02757e+06	1.4903e+06	14.65	28.55	4.8	High	High	Peak Found	High	Peak Found	Peak Found	High	High	High
AAS96456.1	1980	hypothetical protein	8.494	16	2	8	2	130	14.6	5.11	10.37	2	0	2.164	1.297	0.785	0.236076	0.978652	0.953073	86.55	108.35	86.37	339292	853424	607647	81.73	44.65	78.61	Peak Found	High	High	High	High	Peak Found	Peak Found	High	High
AAS96363.1	1887	hypothetical protein	136.553	45	25	137	25	580	67.5	8.59	166.35	25	0	1.036	0.954	0.9	0.938709	0.988956	0.954743	49.93	56.04	60.53	2.05578e+07	2.23514e+07	1.8127e+07	14.91	3.5	5.6	High	High	High	High	High	High	High	High	High
AAS95514.1	1034	hypothetical protein	20.913	20	5	13	5	261	28.7	5.66	9.78	5	0	0.659	1.013	1.28	0.539852	0.993965	0.961158	58.8	51.95	38.29	1.54814e+06	1.02303e+06	1.37084e+06	12.06	11.83	18.65	High	High	High	High	High	Not Found	High	High	High
AAS94893.1	410	hypothetical protein	32.518	36	8	37	8	201	23.1	4.35	48.81	8	0	0.888	0.901	0.922	0.915461	0.964364	0.961158	53.21	29.46	64.4	4.83889e+06	4.63545e+06	4.31507e+06	9.52	9.49	9.13	High	High	High	High	High	High	High	High	High
AAS94553.1	69	hypothetical protein	94.635	17	17	66	17	1467	155.6	6.09	63.34	17	0	1.41	1.82	1.368	0.393301	0.681006	0.964272	55.93	52.35	63.38	3.46183e+06	3.68955e+06	5.16132e+06	7.43	8.18	0.65	High	High	High	High	High	High	High	High	High
AAS95323.1	843	hypothetical protein	56.415	24	9	50	9	532	55.9	6.07	74.06	9	0	1.39	1.573	1.364	0.420113	0.833416	0.964272	68.24	64.35	57.99	3.87071e+06	4.71134e+06	5.88577e+06	25.66	32.71	13.96	High	High	High	High	High	High	High	High	High
AAS96684.1	2211	hypothetical protein	19.451	5	4	13	4	872	99.5	7.97	9.32	4	0	1.266	1.138	0.87	0.677937	0.993965	0.969065	40.14	96.97	76.63	2.66358e+06	3.42959e+06	1.05312e+06	74.61	70.96	43.19	Peak Found	High	High	Peak Found	High	High	High	High	High
AAS96599.1	2126	hypothetical protein	23.022	48	4	19	4	129	13.9	8.5	14.76	4	0	1.928	1.809	0.91	0.0580341	0.723643	0.972027	79.71	102.49	82.08	2.22197e+06	2.38278e+06	3.03185e+06	12.06	43.35	56.27	High	High	Peak Found	Peak Found	High	High	High	High	High
AAS97689.1	3219	hypothetical protein	35.975	23	8	38	8	400	44.7	6.68	27.85	8	0	1.516	1.028	0.947	0.187716	0.993965	0.972027	137.27	56.2	129.78	3.2412e+06	6.19654e+06	2.35595e+06	8.72	8.43	4.88	High	High	High	High	High	High	High	High	High
AAS95867.1	1389	hypothetical protein	19.072	18	4	16	4	377	41.3	8.4	14.2	4	0	0.918	0.906	1.261	0.953718	0.992001	0.972027	36.82	61.53	78.54	1.49743e+06	394168	837061	57.44	3.57	7.73	High	High	Peak Found	High	Peak Found	Not Found	High	High	High
AAS94820.1	337	hypothetical protein	57.36	21	13	43	13	656	72.3	8.12	57.1	13	0	1.024	1.229	0.949	0.952049	0.975395	0.976855	44.76	74.12	69.83	6.0437e+06	8.8602e+06	4.56068e+06	40.46	25.97	13.98	High	High	High	High	High	High	High	High	High
AAS96796.1	2323	hypothetical protein	6.184	11	2	10	2	140	16.1	8.16	10.09	2	0	0.935	0.996	1.223	0.966597	0.993965	0.977896	34.6	39.25	56.87	823136	867736	996323	10.52	29.37	27.78	High	High	High	High	High	Peak Found	High	High	High
AAS96755.1	2282	hypothetical protein	13.782	9	3	13	3	516	54.8	10.2	14.09	3	0	1.255	1.337	0.926	0.784406	0.956732	0.98323	53.43	42.05	73.21	682778	3.60982e+06	948994	30.54	76.48	2.94	High	High	Peak Found	High	Peak Found	Not Found	High	High	High
AAS94617.1	133	hypothetical protein	193.247	50	14	700	14	240	25.9	8.54	1190.63	14	0	1.124	1.042	0.976	0.807695	0.993965	0.98323	73.13	53.99	70.15	1.41434e+08	1.43015e+08	1.45006e+08	15.82	11.56	11.3	High	High	High	High	High	High	High	High	High
AAS96060.1	1582	hypothetical protein	37.326	38	9	37	9	279	29.8	7.99	27.79	9	0	0.821	1.428	1.253	0.823302	0.921572	0.98323	51.12	62.99	83.87	2.42008e+06	2.37357e+06	3.45344e+06	16.32	13.05	9.42	High	High	High	High	High	Peak Found	High	High	High
AAS97642.1	3172	hypothetical protein	57	20	9	52	9	715	72.7	4.08	49.52	9	0	0.99	0.961	0.992	0.975555	0.992001	0.98323	92.5	91.02	89.93	6.51466e+06	6.72408e+06	5.02368e+06	41.74	19.68	29.23	High	High	High	High	High	High	High	High	High
AAS96959.1	2487	hypothetical protein	19.727	17	6	13	6	395	43.6	5.94	4.02	6	0	1.6	1.593	1.172	0.600647	0.901395	0.984176	78.26	109.8	53.74	607541	731986	632266	24.58	13.06	28.26	High	High	High	High	High	High	High	High	High
AAS97811.1	3342	hypothetical protein	18.6	27	3	15	3	138	15	5.24	16.65	3	0	1.238	0.792	0.989	0.7002	0.915515	0.984176	52.35	102.33	87.56	3.37986e+06	5.41133e+06	2.24018e+06	28.56	36.53	31.57	High	High	High	High	High	High	High	High	Peak Found
AAS95485.1	1005	hypothetical protein	107.956	39	14	86	14	406	42.9	8.05	146.99	14	0	0.812	1.02	1.239	0.762834	0.993965	0.984176	64.13	76.12	90.16	1.05322e+07	1.14032e+07	1.16377e+07	26.32	15.19	19.98	High	High	High	High	High	High	High	High	High
AAS95886.1	1408	hypothetical protein	33.391	53	4	39	4	100	10.7	5.15	60.61	4	0	1.057	1.072	0.995	0.918347	0.998695	0.984176	50.59	37.11	58.5	1.05771e+07	9.48303e+06	1.04e+07	10.29	22.3	7.49	High	High	High	High	High	High	High	High	High
AAS95998.1	1520	hypothetical protein	9.653	9	2	6	2	328	36.9	6.47	4.25	2	0	1.005	0.892	0.888	0.985566	0.966741	0.984176	14.43	45.02	45.02	240173	241396	318231	15.2	5.77	39.74	High	Peak Found	Not Found	High	High	Not Found	High	Peak Found	High
AAS94841.1	358	hypothetical protein	9.073	7	2	5	2	247	28.4	6.38	6.19	2	0	1	0.902	0.9	0.999866	0.992001	0.984176	72.3	142.76	18.49	914744	807500	709677	12.88	6.21	9.49	Peak Found	High	Peak Found	High	High	Not Found	High	Peak Found	Peak Found
AAS96082.1	1604	hypothetical protein	33.777	33	6	28	6	192	21.3	5.16	35.35	6	0	1.128	1.736	1.207	0.922596	0.770827	0.984268	49.57	56.16	87.26	2.31102e+06	1.99321e+06	3.08115e+06	11.84	24.65	26.43	High	High	High	High	High	High	High	High	High
AAS96160.1	1683	hypothetical protein	25.577	12	7	21	7	578	67.6	8.18	17.64	7	0	1.3	0.827	0.919	0.747365	0.956732	0.985375	65.75	76.19	38.97	2.11229e+06	1.86169e+06	1.20055e+06	19.12	20.4	10.9	High	High	High	High	High	High	High	High	High
AAS94609.1	125	hypothetical protein	34.571	25	7	19	7	377	39.3	6.76	22.14	7	0	1.039	1.239	0.932	0.971742	0.981724	0.990241	50.69	44	83.91	960386	1.48463e+06	1.30285e+06	33.3	47.33	6.93	High	High	High	High	High	High	High	High	High
AAS96067.1	1589	hypothetical protein	35.11	20	5	28	5	262	28.2	8.48	45.04	5	0	1.042	1.231	1.228	0.957487	0.96737	0.990647	47.38	63.37	35.72	3.93185e+06	4.34076e+06	4.65395e+06	11.04	8.01	12.3	High	High	High	High	Peak Found	High	High	High	High
AAS97208.1	2736	hypothetical protein	8.08	12	2	6	2	169	17.2	9.55	2.43	2	0	3.061	1.891	0.945	0.0873871	0.870056	0.997848	157.16	53.54	32.96	151370	383073	289376	5.76	56.13	16.85	High	Not Found	Not Found	High	High	Peak Found	High	Peak Found	High
AAS94775.1	292	hypothetical protein	27.476	17	5	6	5	368	41.5	6.48	8.54	5	0	0.432	0.576	0.943	0.134673	0.754122	0.997848	72.77	43.44	95.53	957169	413431	905787	14.89	43.84	20.36	High	High	Peak Found	Peak Found	High	Peak Found	High	High	High
AAS97643.1	3173	hypothetical protein	17.545	69	3	22	3	58	6.5	4.84	3.68	3	0	0.843	0.786	1.149	0.85554	0.915515	0.997848	43.45	46.25	52.01	2.66884e+06	2.19547e+06	2.17357e+06	12.96	25.53	27.87	High	High	High	High	High	High	High	Peak Found	High
AAS95150.1	669	hypothetical protein	17.937	17	3	14	3	256	29.1	8.09	8.09	3	0	0.823	0.997	1.092	0.866809	0.993965	0.997848	42.99	19.44	32.52	1.69353e+06	1.33196e+06	1.14682e+06	15.15	37.01	11.57	High	High	High	High	High	High	Peak Found	High	High
AAS97656.1	3186	hypothetical protein	42.049	46	8	26	8	273	29.3	8.35	34.39	8	0	1.064	0.97	1.012	0.953007	0.993965	0.997848	71.02	57.26	57.29	2.27607e+06	2.34077e+06	2.56024e+06	32.55	14.24	10.94	High	High	High	High	High	High	High	High	High
AAS96169.1	1692	hypothetical protein	21.53	45	4	21	4	131	14.4	6.37	28.79	4	0	0.951	0.955	0.981	0.96948	0.992001	0.997848	27.08	49.67	37.35	3.58191e+06	1.99379e+06	2.11018e+06	18.73	38.25	8.69	High	High	High	High	Peak Found	High	High	High	High
AAS96888.1	2415	hypothetical protein	11.716	9	3	14	3	575	64.1	9.54	6.81	3	0	0.756	0.836	1.076	0.790256	0.964364	0.997949	46.33	53.57	54.23	966131	791819	770770	70.82	23.37	38.88	High	High	High	High	High	High	High	High	High
AAS97720.1	3250	hypothetical protein	17.89	27	5	15	5	233	26.1	8.7	5.57	5	0	0.779	0.934	1.091	0.823302	0.993965	0.997949	57.4	44.17	14.53	1.4405e+06	399203	1.1309e+06	26.1	29.83	6.5	High	High	Peak Found	High	High	Not Found	High	High	High
AAS96900.1	2427	hypothetical protein	81.312	46	9	145	9	213	23.7	6.52	327.88	9	0	1.338	1.369	1.149	0.33081	0.937226	0.99805	48.57	64.62	62.62	2.72559e+07	3.08707e+07	3.00974e+07	19.83	24.53	21.01	High	High	High	High	High	High	High	High	High
AAS97108.1	2636	hypothetical protein	38.785	27	8	29	8	389	40.7	8.88	30.08	8	0	1.205	1.273	1.026	0.875868	0.964364	0.99805	30.59	79.7	52.25	1.52829e+06	1.74302e+06	2.81928e+06	26.98	31.12	10	High	High	High	High	High	High	High	High	High
AAS95473.1	993	hypothetical protein	10.708	11	2	10	2	240	26.2	7.06	15.93	2	0	0.947	1.337	0.982	0.96948	0.956732	0.99805	57.64	37.2	61.77	1.18332e+06	1.30093e+06	1.01805e+06	69.18	50.61	4.03	High	High	High	High	High	High	High	High	High
AAS95744.1	1266	hypothetical protein	11.638	3	2	7	2	1145	122	6.19	6.5	2	0	1.107	1.27	0.989	0.971674	0.993965	0.99805	20.03	42.2	45.55	237387	269004	327935	9.58	9.89	34.19	High	Peak Found	Peak Found	High	High	Not Found	High	High	High
AAS96609.1	2136	hypothetical protein	13.6	21	4	12	4	393	41.7	5.66	13.71	4	0	1.516	1.331	1.047	0.693845	0.955519	0.998377	61.78	39.14	13.43	615595	647294	890956	19.7	6.11	11.08	Peak Found	High	Peak Found	High	Peak Found	Not Found	High	High	High
AAS95331.1	851	hypothetical protein	238.479	55	17	484	17	248	25.8	4.74	1349.76	17	0	0.956	1.052	1.138	0.99046	0.993965	0.998377	60.9	50.72	53.23	2.1961e+08	2.05503e+08	2.30635e+08	6.9	14.22	3.35	High	High	High	High	High	High	High	High	High
AAS94831.1	348	hypothetical protein	40.389	15	8	30	8	574	65.3	7.43	36.9	8	0	0.625	0.714	1.058	0.206274	0.846236	0.999667	47.87	50.73	82.25	3.48636e+06	2.37678e+06	1.90968e+06	12.41	20.05	17.57	High	High	High	High	High	High	High	High	High
AAS95140.1	659	hypothetical protein	27.677	20	4	19	4	256	27.8	8.47	22.38	4	0	1.302	0.914	1.031	0.807695	0.992001	0.999667	136.64	40.79	68.1	1.12927e+06	1.14713e+06	1.53425e+06	6.6	21.34	13.22	High	High	High	High	High	Peak Found	High	High	High
AAS97671.1	3201	hypothetical protein	11.033	9	3	11	3	353	38.2	6.46	0	3	0	1.2	1.264	1.019	0.938474	0.992001	0.999667	37.48	30.08	39.16	315810	421486	390876	29.12	17.48	18.76	High	High	Peak Found	High	High	Peak Found	High	High	High
AAS96066.1	1588	hypoxanthine phosphoribosyltransferase	48.369	49	10	50	10	176	20	6.7	58.67	10	0	0.835	0.657	0.973	0.811099	0.722096	0.978407	46.4	41.95	94.27	6.61552e+06	3.52554e+06	5.02588e+06	1.7	15.42	25.84	High	High	High	High	High	High	High	High	High
AAS94768.1	285	imidazole glycerol phosphate synthase, glutamine amidotransferase subunit	16.092	15	3	14	3	213	23.2	5.53	12.8	3	0	1.295	1.893	1.633	0.823302	0.722096	0.821751	40.13	42.75	28.19	938223	1.28937e+06	2.14486e+06	26.38	42.05	11.71	High	High	Peak Found	High	High	High	High	High	High
AAS94769.1	286	imidazoleglycerol phosphate synthase, cyclase subunit	29.154	25	6	35	6	259	27.5	5.36	38.3	6	0	0.925	0.922	0.854	0.950114	0.981424	0.935383	79.31	69.46	85.08	3.40797e+06	3.81982e+06	2.86907e+06	26.56	37.91	24.52	High	High	High	High	High	High	High	High	High
AAS95520.1	1040	imidazoleglycerol-phosphate dehydratase	9.234	12	3	7	3	202	22.1	6.34	3.36	3	0	1.807	0.704	0.303	0.465616	0.895298	0.265384	112	128.63	54.24	529958	668585	179911	34.34	14.09	33.94	Peak Found	High	Peak Found	High	High	Peak Found	Peak Found	High	High
AAS97705.1	3235	IMP cyclohydrolase, putative	42.13	39	6	27	6	200	21.4	6.04	50.6	6	0	1.856	3.498	2.203	0.11605	0.0645332	0.566786	49.76	46.23	28.01	1.67196e+06	2.67216e+06	6.10435e+06	30.58	18.63	22.24	High	High	High	High	High	High	High	High	High
AAS94951.1	468	indole-3-glycerol phosphate synthase	24.303	23	7	32	7	257	26.9	5.69	41.03	7	0	0.395	0.979	1.841	0.000226718	0.993965	0.737876	79.02	73.39	61.67	4.45028e+06	2.20907e+06	4.18045e+06	9.63	8.89	9.98	High	High	High	High	High	High	High	High	High
AAS96427.1	1951	indolepyruvate ferredoxin oxidoreductase, alpha subunit, putative	156.931	44	23	214	23	616	65.5	6.23	366.59	23	0	1.301	0.945	0.735	0.413267	0.982819	0.829128	56.14	69.63	56.69	3.97073e+07	5.01184e+07	3.09469e+07	19.68	10.68	21.11	High	High	High	High	High	High	High	High	High
AAS96426.1	1950	indolepyruvate ferredoxin oxidoreductase, beta subunit, putative	64.614	61	8	67	8	198	20.4	6.76	90.95	8	0	0.863	1.321	1.374	0.870738	0.956732	0.953073	94.22	89.93	54.09	5.70455e+06	5.49031e+06	6.87109e+06	28.31	16.41	10.94	High	High	Peak Found	High	Peak Found	Not Found	Peak Found	High	High
AAS95557.1	1077	inner membrane protein, 60 kDa	85.161	31	12	118	12	534	58.8	8.16	142.3	12	0	0.73	1.272	1.923	0.474587	0.964364	0.714167	63.04	55.58	77.02	4.34205e+07	2.35766e+07	4.37338e+07	16.84	3.81	5.53	High	High	High	High	High	High	High	High	High
AAS96114.1	1636	inorganic pyrophosphatase, manganese-dependent	157.662	72	18	312	18	306	32.7	5.08	576.87	18	0	1.084	2.095	1.713	0.870738	0.490903	0.804386	73.52	77.76	59.41	7.37009e+07	1.11708e+08	1.61609e+08	59.6	19.85	11.84	High	High	High	High	High	High	High	High	High
AAS95524.1	1044	inosine-5`-monophosphate dehydrogenase	218.707	52	26	368	26	485	52.1	7.27	618.6	26	0	1.014	1.062	0.999	0.953873	0.994465	0.984268	52.02	51.17	55.32	5.79476e+07	6.70336e+07	6.2322e+07	32.52	16.19	11.44	High	High	High	High	High	High	High	High	High
AAS97444.1	2973	integration host factor, beta subunit	15.017	24	2	44	2	91	10.3	9.35	74.94	2	0	0.559	0.916	1.45	0.0508108	0.966741	0.941798	64.23	80.6	68.67	5.69439e+06	5.07139e+06	6.31573e+06	68.74	29.95	28.74	High	High	High	High	High	High	High	High	High
AAS96096.1	1618	iojap-related protein	18.332	34	5	34	5	134	14.9	5.14	24.64	5	0	1.026	0.847	0.569	0.971674	0.951685	0.621209	86.12	76.53	70.5	3.8825e+06	2.53275e+06	2.94783e+06	38.31	47.16	13.24	High	High	High	High	High	High	High	High	High
AAS96407.1	1931	iron-sulfur cluster-binding protein	29.952	41	5	27	5	147	16.5	6.64	32.32	5	0	1.678	3.464	4.125	0.38195	0.0902498	0.0549135	68.35	87.32	81.53	1.37143e+06	1.04383e+06	3.08467e+06	12.15	20.45	16.75	High	High	High	High	High	High	High	High	High
AAS97016.1	2544	iron-sulfur cluster-binding protein	44.081	30	8	41	8	271	27.9	6.57	52.57	8	0	0.716	2.769	3.296	0.611471	0.199337	0.135445	67.91	56.42	67.41	2.24424e+06	1.89217e+06	5.69678e+06	12.24	21.74	14.26	High	High	High	High	High	High	High	High	High
AAS97504.1	3033	iron-sulfur cluster-binding protein	311.579	62	42	485	42	717	79.6	8.38	736.49	42	0	0.944	1.995	2.092	0.971674	0.56252	0.616353	76.56	69.99	70.73	5.91803e+07	7.62296e+07	1.13351e+08	103.16	8.39	12.82	Peak Found	High	High	High	High	Not Found	High	High	High
AAS94656.1	172	iron-sulfur cluster-binding protein	34.733	31	9	24	9	333	35.1	7.64	28.06	9	0	1.826	2.734	1.81	0.236076	0.208102	0.762056	71.47	76.76	61.39	1.64883e+06	986456	5.11661e+06	12.49	19.83	39.62	High	High	High	High	High	Peak Found	Peak Found	High	High
AAS96259.1	1782	iron-sulfur cluster-binding protein	150.917	53	24	236	24	475	52.6	8.98	389.82	24	0	1.16	0.85	0.757	0.735742	0.937226	0.846621	62.41	53.88	60.38	3.0217e+07	3.50538e+07	2.77553e+07	130.41	52.35	25.65	Peak Found	High	High	High	High	High	High	High	High
AAS97499.1	3028	iron-sulfur cluster-binding protein	138.668	57	21	212	21	422	45.9	7.9	304.75	21	0	1.275	1.178	0.958	0.477173	0.993965	0.980209	64.47	71.64	57.42	3.27698e+07	4.75501e+07	3.6716e+07	31.29	2.33	27	High	High	High	High	High	High	High	High	High
AAS97819.1	3350	iron-sulfur cluster-binding protein	18.06	60	3	14	3	77	8.6	8.5	20.91	3	0	3.097	2.841	1.002	2.05175e-07	0.196677	0.985375	63.7	51.11	75.51	1.26437e+06	9.90379e+06	2.95811e+06	43.77	24.27	14.61	High	High	High	High	High	High	High	High	High
AAS97269.1	2797	iron-sulfur cluster-binding protein	82.113	49	11	91	11	295	30.9	5.22	110.37	11	0	0.939	1.094	1.117	0.971674	0.994289	0.999667	53.32	60.99	66.45	1.30256e+07	1.25726e+07	1.53356e+07	9.06	26.37	11.14	High	High	High	High	High	High	High	High	High
AAS94980.1	498	iron-sulfur cluster-binding protein, putative	15.021	12	4	9	4	501	55.2	8.21	3.63	4	0	0.818	0.637	0.101	0.870738	0.842031	0.00192983	36.56	133.92	141.2	981288	790617	172263	19.17	31.4	20.89	High	High	High	High	High	Peak Found	High	High	High
AAS95388.1	908	iron-sulfur cluster-binding protein, putative	11.037	6	3	8	3	543	56.8	6.39	3.36	3	0	0.08	0.627	0.668	2.23871e-16	0.718486	0.895966	130.91	52.68	78.81	5.08342e+06	368833	582935	10.65	7.68	9.35	High	High	High	High	High	High	High	High	High
AAS96576.1	2103	iron-sulfur cluster-binding/ATPase domain protein	54.945	31	9	55	9	287	30.4	6.16	88.01	9	0	0.945	1.565	1.589	0.971674	0.858785	0.86483	73.67	75.84	76.45	8.29538e+06	5.02432e+06	7.51051e+06	57.59	20.19	13.74	High	High	High	High	High	High	High	High	High
AAS96577.1	2104	iron-sulfur cluster-binding/ATPase domain protein	52.869	25	6	73	6	301	31.4	5.9	158.31	6	0	1.369	1.927	1.585	0.280136	0.617396	0.865574	41.87	32.93	43.63	1.1454e+07	1.46714e+07	2.35535e+07	58.29	9.81	11.37	High	High	High	High	High	High	High	High	High
AAS94517.1	33	isochorismatase family protein	23.31	24	3	24	3	204	21.4	5.6	12.83	3	0	0.813	1.343	1.652	0.870738	0.95937	0.833374	36.54	29.91	34.72	942675	720996	1.12062e+06	19.11	41.96	39.5	High	High	High	High	High	Peak Found	High	High	High
AAS94960.1	477	isocitrate dehydrogenase, NADP-dependent	59.207	39	13	55	13	380	41.5	5.68	39.16	13	0	0.616	1.331	2.111	0.173626	0.950679	0.59336	63.17	60.88	48.96	4.01489e+06	2.57097e+06	5.47419e+06	9.28	14.21	13.59	High	High	High	High	High	Peak Found	High	High	High
AAS96403.1	1927	isoleucyl-tRNA synthetase	130.659	30	26	146	26	938	105.9	6.34	159.79	26	0	1.115	1.539	1.553	0.824746	0.862407	0.88062	73.87	61.62	82.48	2.6154e+07	2.37218e+07	3.91641e+07	13.34	14.63	8.88	High	High	High	High	High	High	High	High	High
AAS95856.1	1378	ketol-acid reductoisomerase	239.477	67	24	729	24	331	36	6.47	1537.54	24	0	0.774	0.91	1.134	0.636969	0.964364	0.998377	75.04	69.68	55.62	2.84946e+08	2.39379e+08	2.89569e+08	29.99	30.38	20.57	High	High	High	High	High	High	High	High	High
AAS96286.1	1809	L-aspartate oxidase	55.825	24	10	40	10	528	58.3	7.5	40.52	10	0	1.296	1.151	0.925	0.623627	0.993965	0.971887	41.65	48.32	64.93	2.95767e+06	3.72678e+06	3.21199e+06	2.83	37.88	12.9	High	High	High	High	High	High	High	High	High
AAS95674.1	1196	leucyl-tRNA synthetase	97.2	26	19	80	18	829	93.9	5.55	92.99	19	1	0.748	1.454	1.973	0.575863	0.90225	0.677894	62.74	49.73	67.12	6.76425e+06	5.43178e+06	9.78664e+06	8.82	35.95	14.86	High	High	High	High	High	High	High	High	High
AAS95839.1	1361	lipid A disaccharide synthase	26.544	25	7	15	7	376	41.5	7.94	0	7	0	0.741	0.832	1.12	0.747365	0.961193	0.994431	45.31	48.2	67.34	1.40955e+06	909262	1.35002e+06	46.03	34.07	29.98	High	High	Peak Found	High	High	High	High	High	High
AAS96847.1	2374	lipoprotein releasing system, ATP-binding protein	9.021	12	2	9	2	233	25.5	5.97	11.99	2	0	1.375	0.772	0.551	0.708029	0.937226	0.717654	16.71	11.57	5.78	1.10212e+06	1.53906e+06	853686	12.7	11.6	6.19	High	High	High	High	High	Not Found	High	High	High
AAS96848.1	2375	lipoprotein releasing system, permease protein	24.757	19	6	19	6	411	44.1	9.17	7.2	6	0	0.565	1.314	1.976	0.285658	0.956732	0.699561	97.82	38.42	87.08	1.59933e+06	835167	1.81165e+06	3.11	19.24	10.55	High	High	High	High	High	High	Peak Found	High	High
AAS97719.1	3249	lipoprotein, putative	27.58	29	5	23	5	226	23.8	8.25	26.54	5	0	0.752	2.323	3.245	0.756999	0.428508	0.177596	59.92	40.98	66.03	1.6599e+06	1.07828e+06	4.03197e+06	3.79	10.73	17.06	High	High	High	High	High	Not Found	High	High	High
AAS94727.1	243	lipoprotein, putative	32.859	39	6	20	6	222	24.3	8.63	13.96	6	0	0.637	4.017	2.871	0.55637	0.0742443	0.301709	73.48	89.57	62.89	1.07595e+06	695179	1.39524e+06	32.24	17.28	3.37	High	High	High	High	Peak Found	Not Found	High	High	High
AAS96318.1	1842	lipoprotein, putative	41.824	34	7	32	7	318	34.6	5.21	36.06	7	0	0.668	1.815	2.602	0.284032	0.718486	0.370115	47.31	45.74	56.16	5.23663e+06	3.57875e+06	7.29983e+06	22.17	6.54	5.19	High	High	High	High	High	High	High	High	High
AAS97513.1	3042	lipoprotein, putative	8.897	23	2	10	2	78	8.8	7.9	25.37	2	0	0.91	0.38	0.387	0.95033	0.320025	0.397326	53.95	57.11	54.45	1.1988e+06	1.04947e+06	391851	36.61	13.58	41.52	High	High	High	High	High	High	High	High	High
AAS96968.1	2496	lipoprotein, putative	9.217	41	3	6	3	150	15.9	5.88	0	3	0	1.236	3.002	2.604	0.938474	0.303615	0.422692	68.91	71.37	56.61	211186	261017	1.17162e+06	31.08	53.75	6.56	Peak Found	High	Peak Found	Peak Found	High	Not Found	Peak Found	High	High
AAS96995.1	2523	lipoprotein, putative	21.856	31	4	22	4	158	17.1	5.78	27.86	4	0	1.734	0.968	0.581	0.0409984	0.993965	0.598534	49.14	37.37	53.17	4.60861e+06	7.78972e+06	4.20522e+06	18.52	15.81	8.05	High	High	High	High	High	High	High	High	High
AAS94632.1	148	lipoprotein, putative	90.306	52	11	372	11	203	23.1	8.6	627.03	11	0	1.009	0.543	0.594	0.959112	0.461986	0.631917	52.85	67.94	63	9.90074e+07	1.23083e+08	6.82833e+07	12.91	9.76	15.49	High	High	High	High	High	High	High	High	High
AAS96015.1	1537	lipoprotein, putative	156.388	73	13	309	13	188	20.4	6.05	526.1	13	0	0.436	0.956	2.015	0.000155265	0.990619	0.658462	87.54	50.97	80.96	4.07432e+07	2.99667e+07	4.51058e+07	20.14	7.23	11.77	High	High	High	High	High	High	High	High	High
AAS97102.1	2630	lipoprotein, putative	23.108	19	4	11	4	291	30.7	8.03	9.33	4	0	0.895	1.059	2.084	0.952049	0.996604	0.730157	56.88	54.26	47.55	523755	213546	754320	11.58	47.71	104.82	Peak Found	High	Peak Found	Not Found	High	Peak Found	High	High	High
AAS97598.1	3128	lipoprotein, putative	31.903	36	5	16	5	205	21.6	6.79	17.27	5	0	0.729	0.724	1.615	0.708029	0.897678	0.833374	76.19	99.89	117.03	1.55158e+06	947298	1.90752e+06	33.34	16.68	18.74	High	High	Peak Found	High	High	Peak Found	High	High	High
AAS97385.1	2913	lipoprotein, putative	11.438	7	2	4	2	335	36.7	8.32	10.32	2	0	0.96	2.087	1.81	0.971674	0.736882	0.833374	76.25	95.83	94.06	208296	231194	540079	23.09	1.71	66.63	Peak Found	High	Peak Found	High	Peak Found	Peak Found	Peak Found	High	High
AAS97821.1	3352	lipoprotein, putative	35.859	52	8	49	8	189	20	5.54	49.75	8	0	1.062	1.442	1.625	0.944842	0.901395	0.864178	67.74	69.34	81.65	4.08704e+06	5.00194e+06	6.39034e+06	32.91	50.03	15.88	High	High	High	High	High	High	High	High	High
AAS97055.1	2583	lipoprotein, putative	10.126	17	2	16	2	168	17.8	7.61	7.74	2	0	0.868	0.564	0.658	0.929563	0.740049	0.875192	77.94	78.2	47.98	1.09269e+06	615747	465830	49.97	46.3	6.52	High	High	High	High	High	Peak Found	High	High	High
AAS95673.1	1195	lipoprotein, putative	36.519	32	5	32	5	172	19.1	8.78	24.35	5	0	0.967	1.683	1.52	0.975555	0.778414	0.896116	46.52	62.57	52	4.43881e+06	4.13186e+06	1.28703e+07	44.95	7.06	16.04	High	High	High	High	High	High	High	High	High
AAS95064.1	583	lipoprotein, putative	20.303	17	6	18	6	423	45.5	6.07	11.91	6	0	1.365	1.14	0.791	0.699671	0.993965	0.949735	41.29	57.45	76.85	1.56487e+06	1.91394e+06	854676	6.96	12.14	10.86	High	High	High	High	Peak Found	High	High	High	High
AAS95241.1	761	lipoprotein, putative	137.12	68	12	256	12	196	21.1	9.29	460.46	12	0	0.771	1.097	1.357	0.62499	0.993965	0.957937	53.64	50.68	52.32	5.80044e+07	5.66454e+07	6.40181e+07	14	7.75	13.21	High	High	High	High	High	High	High	High	High
AAS96125.1	1648	lipoprotein, putative	11.289	16	2	12	2	146	16.1	8.59	10.59	2	0	0.711	0.949	1.222	0.7061	0.993965	0.976855	46.96	50.09	33.99	1.07251e+06	876850	1.16593e+06	44.37	18.12	24.51	High	High	High	High	High	Peak Found	High	Peak Found	High
AAS96969.1	2497	lipoprotein, putative	17.593	18	4	15	4	244	26	7.2	15.76	4	0	1.422	1.447	0.939	0.611376	0.914747	0.984176	39.75	34.24	25.7	1.68158e+06	1.84789e+06	2.12157e+06	21.72	9.27	4.66	High	High	High	High	High	High	High	High	High
AAS96901.1	2428	lipoprotein, putative	45.045	40	5	54	5	152	15.6	8.5	137.64	5	0	1.147	1.521	1.217	0.762834	0.870104	0.985375	47.43	46.76	25.3	1.47032e+07	1.48792e+07	1.7835e+07	21.61	33.88	13.16	High	High	High	High	High	High	High	High	High
AAS95519.1	1039	lipoprotein, putative	55.872	43	7	92	7	213	23.4	6.05	159.24	7	0	0.844	1.084	1.155	0.837433	0.996734	0.997949	43.47	41.12	55.07	2.32818e+07	1.9094e+07	2.21882e+07	27.64	29.26	21.86	High	High	High	High	High	High	High	High	High
AAS97596.1	3125	lipoprotein, putative	29.978	25	4	29	4	206	21.3	7.25	55.96	4	0	1.244	1.918	1.144	0.695852	0.610271	0.99805	91.69	64.14	104.29	3.06093e+06	5.77576e+06	7.19353e+06	63.88	56.12	18.6	High	High	High	High	High	High	High	High	High
AAS95090.1	609	lipoprotein, putative	68.506	61	11	64	11	211	23.1	7.4	97.52	11	0	0.974	1.018	1.126	0.999866	0.993965	0.999667	83.03	63.72	109.26	6.82605e+06	5.67807e+06	7.56069e+06	9.57	24.74	16.51	High	High	High	High	High	High	High	High	High
AAS95081.1	600	L-lactate dehydrogenase	58.894	44	12	48	12	309	32.2	5.87	66.06	12	0	1.023	0.635	0.58	0.950114	0.69335	0.600337	64.73	65.53	64.12	8.77796e+06	2.53167e+07	3.88776e+06	11.6	21.73	10.91	High	High	High	High	High	High	High	High	High
AAS97497.1	3026	L-lactate permease family protein	65.134	17	9	168	9	570	60.8	8.9	211.06	9	0	1.258	0.374	0.307	0.523083	0.100691	0.0476442	51.19	61.69	44	1.00727e+08	1.15641e+08	5.2561e+07	17.16	11.21	40.73	High	High	High	High	High	High	High	High	High
AAS97155.1	2683	L-lactate permease family protein	31.432	9	5	42	5	516	54.4	9.44	92.82	5	0	1.293	2.328	1.893	0.432775	0.35478	0.72541	38.65	30.12	48.35	1.13014e+07	1.59011e+07	3.15588e+07	101.92	13.41	41.18	High	High	High	Peak Found	High	Not Found	High	High	Peak Found
AAS95931.1	1453	long-chain-fatty-acid--CoA ligase	65.903	31	14	72	14	564	63.4	8.81	75.96	14	0	1.002	0.792	0.799	0.966597	0.901395	0.893483	66.63	41.72	55.58	1.01174e+07	9.26478e+06	7.58022e+06	15.6	10.02	3.06	High	High	High	High	High	High	High	High	High
AAS97355.1	2883	L-seryl-tRNA selenium transferase	80.127	39	17	80	17	469	50.8	8.47	92.21	17	0	0.844	0.804	0.799	0.837433	0.915515	0.893483	59.14	49.18	69	8.82323e+06	7.82995e+06	6.84966e+06	16.34	3.79	10.47	High	High	High	High	High	High	High	High	High
AAS96849.1	2376	lysyl-tRNA synthetase	104.004	39	18	104	18	514	59.2	5.58	174.96	18	0	1.1	0.786	0.705	0.844655	0.895298	0.796345	62.73	55.89	59.74	1.74395e+07	1.71771e+07	1.24194e+07	8.22	47	13.36	High	High	High	High	High	High	High	High	High
AAS94443.1	A0006	magnesium transporter MgtE, putative	36.604	27	9	53	9	331	36.9	6.55	62.28	9	0	0.801	1.047	1.106	0.739215	0.993965	0.998377	70.54	52.37	45.99	4.59108e+06	4.53535e+06	4.55697e+06	5.57	55.92	14.43	High	High	High	High	High	High	High	High	High
AAS95181.1	701	malate synthase G	119.104	34	22	104	22	729	79.4	6.76	144.27	22	0	0.869	1.743	2.09	0.89555	0.733365	0.616353	71.4	57.83	72.72	1.10241e+07	9.17855e+06	1.64511e+07	7.97	19.78	15.67	High	High	High	High	High	High	High	High	High
AAS95727.1	1249	malonyl CoA-acyl carrier protein transacylase	58.272	45	10	50	10	317	33.6	5.54	53.52	10	0	0.915	0.463	0.603	0.951929	0.262354	0.630131	59.2	65.88	95.84	7.57497e+06	7.2684e+06	3.47472e+06	13.04	28.96	16.95	High	High	High	High	High	High	High	High	High
AAS95178.1	697	mannose-1-phosphate guanylyltransferase/mannose-6-phosphate isomerase	48.064	25	11	48	11	472	52.4	6.25	63.86	11	0	0.906	0.99	1.083	0.944842	0.993965	0.998377	43.68	65.04	41.17	1.39971e+07	1.29967e+07	1.03048e+07	31.87	21.71	4.32	High	High	High	High	High	High	High	High	High
AAS95664.1	1186	MazG family protein	29.358	29	6	38	6	267	30.2	4.79	22.79	6	0	0.915	1.252	0.914	0.942506	0.966741	0.964272	52.12	70.99	68.86	2.89514e+06	2.74761e+06	3.90567e+06	22.86	18.31	17.86	High	High	High	High	High	High	High	High	High
AAS96022.1	1544	mechanosensitive ion channel family protein	90.661	18	13	94	13	813	90	9.66	143.45	13	0	0.824	1.343	1.415	0.793009	0.951685	0.943933	74.6	64.93	69.54	6.51945e+06	4.76993e+06	7.9164e+06	12.07	24.92	4.44	High	High	High	High	High	High	High	High	High
AAS95547.1	1067	membrane protein, Bmp family	203.749	55	17	414	17	382	41.3	6.71	791.92	17	0	1.047	1.2	1.133	0.929563	0.992001	0.998377	65.07	50.79	55.33	9.14002e+07	9.91963e+07	1.12512e+08	14.38	18.99	7.55	High	High	High	High	High	High	High	High	High
AAS96012.1	1534	membrane protein, putative	14.429	19	3	27	3	170	17.7	9.64	46.96	3	0	0.57	1.536	2.193	0.290644	0.870104	0.545924	67.83	43.63	67.83	1.63109e+06	1.15512e+06	2.34439e+06	10.29	20.46	7.1	High	High	High	High	High	High	High	High	High
AAS96239.1	1762	membrane protein, putative	22.612	23	3	31	3	152	16.4	9.06	68.51	3	0	1.24	0.67	0.559	0.561856	0.740049	0.546324	35.6	30.8	25.74	1.15345e+07	1.24017e+07	8.22302e+06	25.62	29.47	6.23	High	High	High	High	High	High	High	High	High
AAS94633.1	149	membrane protein, putative	43.475	13	5	126	5	350	37.7	9.63	137.07	5	0	0.967	0.588	0.6	0.998558	0.573865	0.644093	59.85	67.01	64.06	5.06739e+07	5.02688e+07	2.88087e+07	19.22	23.54	31.55	High	High	High	High	High	High	High	High	High
AAS97678.1	3208	membrane protein, putative	16.285	9	3	14	3	327	33.4	7.88	22.13	3	0	0.896	2.267	1.967	0.943306	0.489075	0.677894	52.46	31.74	60.92	1.14187e+06	1.05546e+06	2.20982e+06	23.52	19.21	27.74	Peak Found	High	High	High	High	Peak Found	High	High	High
AAS95730.1	1252	membrane protein, putative	18.349	8	4	11	4	758	83.1	7.61	10.49	4	0	0.957	1.119	1.81	0.971674	0.993965	0.764811	37.17	61.75	94.19	715419	581453	891489	10.76	17.13	16.13	Peak Found	High	Peak Found	High	High	Not Found	High	High	High
AAS96606.1	2133	membrane protein, putative	18.367	7	3	20	2	579	61.8	8.81	24.63	3	0	0.882	0.399	0.55	0.94055	0.455894	0.7713	34.27	6	41.15	635296	560268	328307	2.85	25.75	49.76	High	High	Peak Found	Peak Found	High	Not Found	High	High	High
AAS95423.1	943	membrane protein, putative	59.146	13	7	60	6	599	64.4	8.98	104.95	7	1	0.556	0.558	0.796	0.0242335	0.53975	0.890566	83.11	54.45	65.06	9.55981e+06	1.42803e+07	5.71572e+06	17.43	7.73	22.19	High	High	High	High	High	High	High	High	High
AAS94734.1	251	membrane protein, putative	18.807	17	7	36	7	320	34.1	9.69	46.95	7	0	0.64	1.006	1.528	0.193449	0.993965	0.896116	76.52	56.73	66.24	7.22901e+06	7.20299e+06	8.34415e+06	31.01	31.68	6.08	High	High	High	High	High	High	High	High	High
AAS96957.1	2485	membrane protein, putative	25.484	9	3	32	3	354	38.5	9.7	54.32	3	0	1.042	0.955	0.883	0.950114	0.990683	0.94807	26.68	23.48	21.63	5.58063e+06	6.29816e+06	5.53712e+06	13.28	24.48	9.17	High	High	High	High	High	High	High	High	High
AAS94612.1	128	membrane protein, putative	40.177	21	7	49	7	352	36	9.1	59.22	7	0	1.072	1.051	0.991	0.935944	0.993965	0.98323	27.65	60	52.5	5.49801e+06	5.47678e+06	5.35651e+06	1.87	9.5	4	High	High	High	High	High	High	High	High	High
AAS94616.1	132	membrane protein, putative	83.731	25	9	178	9	374	38.8	9.58	315.03	9	0	0.936	0.9	1.033	0.971674	0.964089	0.997848	69.12	61.46	66.07	3.30629e+07	2.66737e+07	3.10229e+07	19.29	28.78	5.28	High	High	High	High	High	High	High	High	High
AAS94511.1	27	membrane protein, putative	25.904	10	4	28	4	474	51	7.12	46.67	4	0	0.893	1.677	1.098	0.935944	0.804124	0.999667	77.55	87.45	141.9	2.03151e+06	1.32371e+06	3.75684e+06	22.24	11.09	24.69	High	High	High	High	High	High	High	High	High
AAS94748.1	265	membrane protein, putative	34.469	19	4	71	4	219	24	8.68	110.11	4	0	0.987	1.428	1.124	0.971674	0.915515	0.999667	66.86	58.29	65.15	2.98675e+07	2.85927e+07	3.20059e+07	30.21	33.67	2.49	High	High	High	High	High	High	High	High	High
AAS95345.1	865	membrane-associated zinc metalloprotease, putative	17.334	17	4	19	4	354	38.1	6.74	11.08	4	0	0.946	0.949	1.033	0.966597	0.993965	0.999667	61.14	57.31	40.91	1.52961e+06	1.41982e+06	1.34005e+06	20.88	20	31.2	High	High	High	High	High	High	High	High	High
AAS95517.1	1037	mercuric reductase, putative	47.323	27	9	25	9	480	50.6	7.83	24.76	9	0	1.139	0.88	0.784	0.912303	0.966741	0.943933	61.53	33.48	56.75	2.41573e+06	2.03317e+06	1.56469e+06	1.83	52.2	25.6	High	High	High	High	High	Peak Found	High	High	High
AAS96798.1	2325	mercuric transport protein periplasmic component	13.19	26	2	10	2	65	7	5.97	8.7	2	0	2.85	2.845	1.21	0.0818616	0.448986	0.98323	92.49	130.84	108.03	264566	520896	642487	51.08	94.41	46.67	Peak Found	High	High	High	Peak Found	High	Peak Found	High	High
AAS96783.1	2310	metallo-beta-lactamase family protein	17.241	23	4	12	4	248	28	5.08	13.5	4	0	0.702	1.508	2.112	0.720102	0.907707	0.64268	71.41	68.17	93.62	923878	606552	1.40581e+06	13.55	13.56	41.5	High	High	High	High	High	Peak Found	Peak Found	High	High
AAS96489.1	2014	metallo-beta-lactamase family protein	76.921	35	11	100	11	391	43	5.38	168.56	11	0	1.121	1.746	1.724	0.814027	0.729877	0.800505	63.57	58.53	68.08	1.63469e+07	1.68119e+07	2.98729e+07	20.38	21.04	16.6	High	High	High	High	High	High	High	High	High
AAS95356.1	876	metallo-beta-lactamase family protein	60.562	27	13	60	13	554	61.6	6.38	52.86	13	0	1.203	1.025	0.822	0.715905	0.993965	0.905221	68.72	73.52	85.3	5.62175e+06	7.34429e+06	5.19453e+06	30.44	15.45	16.36	High	High	High	High	High	High	High	High	High
AAS96008.1	1530	metallo-beta-lactamase family protein	89.623	28	13	99	13	536	59.9	6.13	149.17	13	0	0.841	0.691	0.863	0.832815	0.781859	0.941798	59.54	56.3	101.01	1.40872e+07	1.12205e+07	9.34446e+06	16.13	41.35	19.13	High	High	High	High	High	High	High	High	High
AAS97776.1	3308	metallo-beta-lactamase family protein	20.966	18	4	22	4	239	25.8	5.69	28.5	4	0	1.617	2.258	1.212	0.394068	0.455894	0.984176	44.17	48.51	45.72	1.24917e+06	1.9883e+06	2.90181e+06	11.76	17.5	23.83	Peak Found	High	High	High	High	High	High	High	High
AAS96316.1	1840	metalloendopeptidase, putative, glycoprotease family	14.82	14	4	12	4	361	38.1	6.35	14.37	4	0	1.324	1.418	2.425	0.800369	0.937226	0.496747	132.76	112.52	108.82	864855	788353	775149	4.68	61.96	16.7	High	High	High	High	High	Peak Found	Peak Found	High	High
AAS97834.1	3365	methionyl-tRNA formyltransferase	16.97	19	5	17	5	330	35.2	5.92	5.7	5	0	1.435	1.124	0.8	0.623627	0.993965	0.950814	35.51	50.13	36.24	1.40408e+06	1.969e+06	1.38233e+06	14.71	58.3	33.06	Peak Found	High	High	High	High	High	High	High	High
AAS96528.1	2055	methionyl-tRNA synthetase	83.424	30	15	61	15	663	73.9	5.88	72.15	15	0	1.435	2.185	1.611	0.329571	0.457185	0.850842	64.41	59.73	76.71	4.27789e+06	4.80592e+06	9.09053e+06	14.56	51.55	5.06	High	High	High	High	High	High	High	High	High
AAS94585.1	101	methlytransferase, UbiE/COQ5 family	16.39	14	4	17	4	508	53.7	6.62	7.35	4	0	1.004	0.195	0.221	0.999866	0.0252089	0.0540404	45.72	67.19	60.75	1.48228e+06	1.51094e+06	357821	15.24	13.52	35.17	High	High	Peak Found	High	High	Peak Found	High	High	Peak Found
AAS96360.1	1884	methyl-accepting chemotaxis protein	188.45	38	25	178	23	800	84.6	5.22	370.57	25	0	1.107	5.778	3.86	0.832815	0.001099	0.0583195	66.73	86.67	99.91	6.73176e+06	9.19439e+06	3.14018e+07	23.49	16.9	8.84	High	High	High	High	High	High	High	High	High
AAS95180.1	700	methyl-accepting chemotaxis protein	59.976	17	11	77	9	818	87.6	5.07	159.16	11	0	0.892	3.043	3.215	0.936512	0.166294	0.162549	59.35	62.35	51.16	1.80076e+06	1.6865e+06	3.57817e+06	29.87	8.26	15.29	High	High	High	Peak Found	High	Not Found	High	High	High
AAS94654.1	170	methyl-accepting chemotaxis protein	163.19	44	27	168	25	689	74.3	5.57	303.64	27	0	0.795	2.079	2.429	0.708029	0.501676	0.41008	57.29	60.67	76.02	1.13765e+07	7.70683e+06	1.88146e+07	24.59	22.42	18.23	High	High	High	High	High	High	High	High	High
AAS95126.1	645	methyl-accepting chemotaxis protein	134.784	36	22	111	19	679	72.2	5.08	213.32	22	0	1.363	4.12	2.294	0.590395	0.0169224	0.530068	56.07	55.19	50.59	2.05159e+06	2.81761e+06	7.6781e+06	25.13	19.58	16.99	High	High	Peak Found	High	High	Peak Found	High	High	High
AAS94827.1	344	methyl-accepting chemotaxis protein	96.173	33	17	85	14	642	67.6	5.43	174.89	17	0	1.243	3.323	2.108	0.844655	0.091077	0.60953	61.68	85.12	83.08	2.00169e+06	548295	5.2225e+06	4.74	12	8.59	Peak Found	High	Peak Found	Peak Found	High	Not Found	High	High	High
AAS95072.1	591	methyl-accepting chemotaxis protein	332.496	67	35	376	32	652	68.7	5.21	702.44	35	3	0.619	1.152	1.865	0.113935	0.993965	0.73608	73.8	60.8	71.88	6.58268e+07	4.77641e+07	7.37235e+07	13.6	18.33	8.73	High	High	High	High	High	High	High	High	High
AAS97057.1	2585	methyl-accepting chemotaxis protein	131.318	36	20	138	18	626	66.9	5.68	250.72	20	0	1.023	1.675	1.679	0.950114	0.784501	0.821751	65.42	73.83	51.88	3.06905e+07	3.22671e+07	2.61742e+07	14.7	10.25	17.93	High	High	High	High	High	High	High	High	High
AAS95230.1	750	methyl-accepting chemotaxis protein	38.659	18	9	62	7	669	71.6	5.47	132.08	9	0	1.408	1.276	0.6	0.823302	0.987534	0.836097	53.79	68.32	46.87	461707	298605	521835	8.08	10.09	9.12	Peak Found	High	Peak Found	High	Peak Found	Not Found	High	High	High
AAS95089.1	608	methyl-accepting chemotaxis protein	289.646	55	33	360	30	677	72.5	5.1	725.29	33	1	0.897	0.722	0.775	0.938474	0.819244	0.865675	49.91	42.29	53.03	7.65839e+07	7.19383e+07	5.03532e+07	9.41	6.31	11.07	High	High	High	High	High	High	High	High	High
AAS96451.1	1975	methyl-accepting chemotaxis protein	170.475	42	23	190	21	604	65.4	5.31	335.36	23	0	0.708	0.599	0.808	0.382809	0.608878	0.896116	47.84	46.71	58.47	1.78256e+07	1.26614e+07	9.55472e+06	17.49	8.76	9.02	High	High	High	High	High	High	High	High	High
AAS94578.1	94	methyl-accepting chemotaxis protein	58.045	21	11	74	9	720	75.4	5.24	151.37	11	0	0.78	1.095	1.447	0.806718	0.993965	0.900079	43.81	40.44	52.08	1.90851e+06	615108	1.81447e+06	13.99	8.49	23.98	High	High	Peak Found	High	High	Peak Found	High	High	High
AAS96438.1	1962	methyl-accepting chemotaxis protein	167.129	35	26	166	23	720	78.1	5.2	262.26	26	0	0.835	1.313	1.456	0.824746	0.956732	0.921499	45.43	50.47	57.66	1.1084e+07	9.93401e+06	1.18134e+07	16.15	27.47	11.15	High	High	High	High	High	High	High	High	High
AAS97210.1	2738	methyl-accepting chemotaxis protein	209.229	38	24	212	22	801	85.7	4.93	426.46	24	0	0.748	1.103	1.412	0.553647	0.993965	0.943933	45.27	75.94	70.7	2.59025e+07	2.34064e+07	2.5201e+07	8.15	15.57	27.5	High	High	High	High	High	High	High	High	High
AAS96768.1	2295	methyl-accepting chemotaxis protein	139.876	30	19	164	17	776	83	5.14	305.42	19	0	1.061	0.814	0.883	0.914157	0.915515	0.949735	46.25	39.28	49.36	1.19365e+07	1.24107e+07	1.06344e+07	5.63	11.81	10.19	High	High	High	High	High	High	High	High	High
AAS97553.1	3082	methyl-accepting chemotaxis protein	154.243	47	25	178	23	587	62.9	5.14	334.73	25	0	1.046	0.914	0.91	0.929563	0.964364	0.964235	49.62	47.36	59.42	2.06583e+07	2.55254e+07	1.77952e+07	1.93	28.31	12.23	High	High	High	High	High	High	High	High	High
AAS95415.1	935	methyl-accepting chemotaxis protein	221.452	47	29	254	27	834	89.8	5.64	474.4	29	0	0.96	1.316	1.313	0.996749	0.956195	0.972027	48	53.9	64.4	2.781e+07	2.67865e+07	3.07108e+07	13.21	18.21	3.93	High	High	High	High	High	High	High	High	High
AAS96345.1	1869	methyl-accepting chemotaxis protein	247.169	50	30	291	28	771	82.2	5.4	570.21	30	0	0.943	1.365	1.302	0.971674	0.937226	0.974669	45.87	56.06	58.43	3.33892e+07	3.30052e+07	4.26603e+07	6.81	12.25	2.52	High	High	High	High	High	High	High	High	High
AAS96333.1	1857	methyl-accepting chemotaxis protein	250.947	56	33	355	30	695	74.4	4.96	647.15	33	1	0.966	1.087	0.976	0.999866	0.996604	0.98323	50.15	49.81	59.44	7.59985e+07	7.84091e+07	6.51388e+07	8.75	8.24	11.1	High	High	High	High	High	High	High	High	High
AAS95149.1	668	methyl-accepting chemotaxis protein	125.294	35	16	125	14	528	55.9	5.17	252.73	16	0	0.847	1.097	1.167	0.844655	0.993965	0.997949	52.95	45.47	49.56	8.91704e+06	9.62024e+06	9.82385e+06	49.11	8.89	8.35	High	High	High	High	High	High	High	High	High
AAS97652.1	3182	methyl-accepting chemotaxis protein DcrA	125.856	43	20	146	18	669	72.9	4.98	240.53	20	0	0.845	0.815	0.955	0.841569	0.915515	0.978407	59.33	57	73.62	1.14365e+07	1.10803e+07	8.29219e+06	9.37	21.41	11.11	High	High	High	High	High	High	High	High	High
AAS97625.1	3155	methyl-accepting chemotaxis protein DcrH	181.643	43	29	152	27	963	104.4	5.94	277	29	0	0.964	2.01	1.972	0.995684	0.550501	0.677894	57.61	66.78	43.6	6.83321e+06	5.9132e+06	1.20967e+07	10.98	3.78	7.16	High	High	High	High	High	Peak Found	High	High	High
AAS96790.1	2317	methyl-accepting chemotaxis protein, putative	39.016	10	5	66	3	589	62.9	5.2	148.46	5	0	1.623	1.949	1.68	0.450691	0.65788	0.796345	66.34	73.44	62.45	1.39918e+06	1.36404e+06	2.22209e+06	12.82	19.92	21.98	High	High	High	High	High	Not Found	High	High	High
AAS97506.1	3035	methyl-accepting chemotaxis protein, putative	163.386	47	26	187	23	603	64.5	5.33	330.57	26	0	0.917	1.122	1.209	0.953718	0.993965	0.989483	51.55	54.99	72.28	1.57588e+07	1.2996e+07	1.70836e+07	2.52	9.19	12.95	High	High	High	High	High	High	High	High	High
AAS96782.1	2309	methyl-accepting chemotaxis protein, putative	333.941	62	39	529	37	695	74.3	5.07	1021.8	39	2	1.081	1.283	1.166	0.875868	0.964364	0.997949	56.41	49.23	57.67	1.67572e+08	1.98248e+08	2.13203e+08	12.13	17.42	17.13	High	High	High	High	High	High	High	High	High
AAS94502.1	18	methyl-accepting chemotaxis protein, putative	84.899	29	15	108	12	749	81.4	5.4	176.81	15	0	1.083	1.218	1.09	0.935944	0.981724	0.998377	32.21	38.95	45.27	3.19952e+06	3.79877e+06	4.39577e+06	6.24	11.23	16.66	High	High	High	High	High	Peak Found	High	High	High
AAS95271.1	791	methylated-DNA--protein-cysteine methyltransferase, DNA-binding domain protein	13.434	19	2	11	2	161	17.1	6.3	6.5	2	0	0.78	1.318	1.576	0.85075	0.964364	0.864178	73.12	51.55	59.19	854308	517535	941320	33.3	102.65	46.79	High	High	High	Peak Found	High	High	High	Peak Found	High
AAS94806.1	323	methylenetetrahydrofolate dehydrogenase/methenyltetrahydrofolate cyclohydrolase	52.324	47	12	48	12	286	30.4	6.77	53.23	12	0	1.067	1.352	1.478	0.942506	0.938238	0.925459	80.98	54.35	56.61	3.57032e+06	4.15149e+06	7.34589e+06	24.39	19.74	26.3	High	High	High	High	High	High	High	High	High
AAS96009.1	1531	methyltransferase, putative	31.644	42	7	33	7	190	20.7	7.21	25.12	7	0	0.62	0.729	1.162	0.280136	0.867606	0.985375	56.59	45.49	62.07	3.03208e+06	1.59504e+06	2.27413e+06	7.03	26.29	15.3	High	High	High	High	High	Peak Found	High	High	High
AAS97621.1	3151	MiaB-like tRNA modifying enzyme YliG, TIGR01125	42.425	27	10	35	10	430	47.2	5.19	33.06	10	0	1.437	1.224	0.838	0.419067	0.986738	0.927741	74.96	62.23	57.86	2.42075e+06	3.1123e+06	2.7245e+06	19.09	10.64	18.68	High	High	High	High	High	High	High	High	High
AAS94772.1	289	molybdenum cofactor biosynthesis protein C	26.147	33	5	26	5	208	22.2	7.14	39.03	5	0	1.36	1.066	1.029	0.592517	0.999187	0.997949	53.41	54.87	43.04	2.48158e+06	2.47799e+06	2.74209e+06	11.65	45.59	21.2	High	High	High	High	High	High	High	High	High
AAS96039.1	1561	molybdenum-binding protein, HTH domain	11.384	28	3	5	3	123	13.5	9.39	5.84	3	0	0.901	0.712	0.513	0.947748	0.90225	0.762131	17.23	50.92	103.35	220168	390972	205610	30.33	2.97	37.44	High	High	Peak Found	High	High	Not Found	Peak Found	High	Peak Found
AAS94663.1	179	molybdenum-pterin binding domain protein/site-specific recombinase, phage integrase family	10.034	43	3	11	3	100	10.5	5.19	2.02	3	0	0.726	3.393	4.103	0.802977	0.272372	0.176184	41.4	56.94	81.93	331322	279262	556421	68.49	61.41	36.4	Peak Found	Peak Found	High	High	Peak Found	Peak Found	High	High	High
AAS94663.1	179	molybdenum-pterin binding domain protein/site-specific recombinase, phage integrase family	13.254	8	3	9	3	465	49.4	8.21	6.37	3	0	1.075	1.373	1.307	0.971674	0.964364	0.972291	84.72	76.17	19.18	437640	338663	419878	42.48	12.05	20.57	High	High	High	High	Peak Found	Not Found	High	Peak Found	High
AAS97461.1	2990	molybdopterin biosynthesis MoeA protein	122.072	35	20	160	20	650	69.8	6.06	242.13	20	0	1.033	0.939	0.815	0.942506	0.975395	0.901583	47.37	59.54	71.25	1.99899e+07	2.58276e+07	2.18073e+07	3.11	15.76	4.84	High	High	High	High	High	High	High	High	High
AAS95431.1	951	molybdopterin biosynthesis MoeA protein, putative	57.745	35	10	47	10	445	46.8	5.36	52.72	10	0	1.376	1.602	1.383	0.443164	0.819244	0.964235	60.48	66.01	41.53	4.61896e+06	4.07432e+06	5.611e+06	0.34	13.73	4.72	High	High	High	High	High	High	High	High	High
AAS96089.1	1611	molybdopterin oxidoreductase domain protein	31.815	15	8	26	8	642	69.8	6.39	12.47	8	0	1.633	1.511	0.911	0.307563	0.895298	0.980264	44.91	45.14	39.85	1.01649e+06	2.87403e+06	1.68146e+06	8.44	4.25	18.85	High	High	Peak Found	High	High	High	High	High	High
AAS95174.1	693	molybdopterin oxidoreductase, iron-sulfur cluster-binding subunit, putative	69.511	51	9	101	9	255	29	7.83	156.36	9	0	0.797	0.807	0.895	0.710194	0.914747	0.953073	66.2	51.76	65.6	4.19619e+07	4.27523e+07	3.74513e+07	44.65	3.42	12.91	High	High	High	High	High	High	High	High	High
AAS95175.1	694	molybdopterin oxidoreductase, molybdopterin-binding subunit, putative	312.132	50	30	737	30	691	72.3	8.54	1076.35	30	0	0.945	0.975	0.989	0.971674	0.993965	0.984176	62.59	62.89	78.15	1.60147e+08	1.82225e+08	1.51568e+08	2.84	6.02	11.97	High	High	High	High	High	High	High	High	High
AAS95173.1	692	molybdopterin oxidoreductase, transmembrane subunit, putative	59.097	12	7	97	7	419	47.5	6.76	125.16	7	0	0.921	0.814	0.847	0.957487	0.915515	0.925459	51.76	61.32	48.91	1.33942e+07	1.17094e+07	9.29217e+06	7.34	16.34	6.37	High	High	High	High	High	High	High	High	High
AAS95070.1	589	molybdopterin-guanine dinucleotide biosynthesis protein B, putative	51.416	51	12	86	12	246	25.9	6.3	86.16	12	0	1.149	1.142	1.148	0.760502	0.993965	0.99805	61.17	74.67	49.86	8.02943e+06	7.90999e+06	9.74681e+06	45.71	69.7	26.39	High	High	High	High	High	High	High	High	High
AAS96701.1	2228	motB protein, putative	47.784	39	7	44	7	244	27.5	4.83	47.87	7	0	0.951	0.983	1.092	0.971674	0.993965	0.99805	31.27	40.16	44.42	4.82266e+06	4.6769e+06	5.05164e+06	16.46	8.56	12.92	High	High	High	High	High	High	High	High	High
AAS96581.1	2108	MTH1175-like domain family protein	40.79	40	4	57	4	119	12.4	6.14	99.26	4	0	2.01	8.113	5.242	0.00440466	2.55834e-05	0.00865952	145.83	102.31	67.8	5.64245e+06	6.09567e+06	3.1342e+07	37.97	32.81	20.74	High	High	High	High	High	High	High	High	High
AAS96582.1	2109	MTH1175-like domain family protein	209.539	55	19	333	19	487	49.9	5.74	581.6	19	0	1.061	3.146	2.931	0.914157	0.093791	0.215831	67.61	85.03	68.27	3.34051e+07	3.29533e+07	9.70012e+07	17.42	19.48	17.41	High	High	High	High	High	High	High	High	High
AAS94725.1	241	MTH1175-like domain family protein	30.846	42	4	32	4	125	13.4	6.42	39.14	4	0	1.396	3.782	1.788	0.43287	0.0283531	0.764811	132.11	51.1	30.63	2.17088e+06	4.82936e+06	8.91142e+06	72.79	13	9.16	High	High	High	High	High	High	High	High	High
AAS97288.1	2816	multidrug resistance protein	3.718	3	2	4	2	1070	114.5	8.09	0	2	0	0.67	1.399	1.094	0.777515	0.966741	0.999667	52.28	90.4	98.98	237160	62186	244814	28.39	41.67	87.2	High	High	Peak Found	High	Peak Found	Not Found	High	Peak Found	Peak Found
AAS94545.1	61	multidrug resistance protein, putative	91.808	19	15	104	15	1046	113.6	5.47	156.98	15	0	1.04	1.028	1.064	0.937193	0.993965	0.997949	67.31	71.33	52.15	1.57161e+07	1.40417e+07	1.14373e+07	25.12	5.48	8.58	High	High	High	High	High	High	High	High	High
AAS95461.1	981	multiphosphoryl transfer protein, putative	97.668	26	17	71	17	854	87.1	4.98	94.7	17	0	0.893	0.783	0.833	0.938474	0.898315	0.915503	47.31	51.04	50.47	7.38852e+06	6.54305e+06	6.72189e+06	7.92	13.13	10.83	High	High	High	High	High	High	High	High	High
AAS96267.1	1790	MutS2 family protein	68.335	22	14	56	14	771	84.6	6.55	56.42	14	0	0.959	0.697	0.749	0.975555	0.819244	0.833374	39.12	30.59	64.79	5.07176e+06	4.31082e+06	3.18821e+06	6.79	8.03	27.76	High	High	High	High	High	High	High	High	High
AAS94992.1	510	N utilization substance protein A	190.457	64	28	218	28	428	47.8	4.83	358.9	28	0	0.839	1.071	1.276	0.832815	0.997974	0.980209	45.83	50.77	56.85	2.61904e+07	2.41406e+07	2.63204e+07	16.84	12.84	10.39	High	High	High	High	High	High	High	High	High
AAS95675.1	1197	N utilization substance protein B	36.169	40	7	32	7	153	16.8	8.41	46.86	7	0	0.825	0.855	1.257	0.791465	0.951685	0.984176	65.92	41.52	80.39	5.2668e+06	5.11461e+06	3.72942e+06	27.7	24.15	13.5	High	High	High	High	High	High	High	High	High
AAS94974.1	492	N-acetyl-gamma-glutamyl-phosphate reductase	63.368	37	11	76	11	354	38	7.09	104.98	11	0	0.958	1.155	1.178	0.987503	0.993965	0.997848	51.91	57.13	43.3	8.48316e+06	6.25446e+06	8.23516e+06	17.03	6.74	31.89	High	High	High	High	High	High	High	High	High
AAS94802.1	319	NAD-dependent epimerase/dehydratase family protein	82.896	42	14	86	14	341	37.7	5.44	106.35	14	0	1.038	1.717	1.989	0.938474	0.751819	0.675364	39.51	57.87	59.49	1.15459e+07	8.29108e+06	1.87586e+07	21.52	7.58	26.77	High	High	High	High	High	High	High	High	High
AAS96927.1	2455	NAD-dependent epimerase/dehydratase family protein	48.728	36	9	42	9	316	35.7	7.05	50.24	9	0	0.94	0.7	0.809	0.962046	0.830619	0.896116	94.12	88.11	110.61	4.47712e+06	4.94356e+06	3.24375e+06	15.72	4.4	11.88	High	High	High	High	High	High	High	High	High
AAS97467.1	2996	NAD-dependent epimerase/dehydratase family protein	28.777	28	5	15	5	307	32.7	6.52	14.28	5	0	1.208	0.925	1.448	0.870803	0.993965	0.905221	77.46	126.55	64.9	1.42431e+06	1.18395e+06	1.04615e+06	33.89	34.47	15.03	High	High	Peak Found	High	Peak Found	Peak Found	High	High	High
AAS97825.1	3356	NAD-dependent epimerase/dehydratase family protein	70.409	34	9	97	9	335	37.5	6.35	116.39	9	0	0.876	0.784	0.851	0.90995	0.895298	0.926726	50.75	57.29	72.13	1.30206e+07	1.05609e+07	1.04851e+07	17.81	6.48	30.07	High	High	High	High	High	High	High	High	High
AAS94825.1	342	NAD-dependent epimerase/dehydratase family protein	45.279	27	7	60	7	304	33.7	5.96	71.14	7	0	1	1.043	0.91	0.971674	0.993965	0.964235	33.91	48.85	62.8	6.6434e+06	7.15718e+06	6.83507e+06	10.7	14.58	9.51	High	High	High	High	High	High	High	High	High
AAS94897.1	414	NADP-dependent malic enzyme-related protein	70.907	36	14	61	14	439	46.9	5.64	73.53	14	0	0.824	1.908	2.613	0.791465	0.664095	0.335593	88.08	51.05	63.12	4.48719e+06	3.22255e+06	9.89051e+06	16.12	29.68	24.4	High	High	High	High	High	High	High	High	High
AAS95005.1	523	negative regulator of flagellin synthesis FlgM	26.281	38	5	25	5	104	11.8	9.44	53.51	5	0	0.922	0.558	0.624	0.95033	0.689364	0.80279	66.51	78.99	63.91	1.79024e+06	1.95312e+06	1.05332e+06	32.51	32.01	58.68	High	High	High	High	High	High	High	High	High
AAS94832.1	349	NeuB family protein	98.634	39	15	115	15	352	39.3	6.38	153.88	15	0	0.857	0.762	0.917	0.867617	0.870056	0.964272	68.42	71.12	70.09	2.0904e+07	2.11851e+07	2.15883e+07	4.51	15.1	18.17	High	High	High	High	High	High	High	High	High
AAS97479.1	3008	NeuB family protein	13.049	9	2	6	2	358	37.8	5.76	5.63	2	0	0.482	0.482	0.861	0.32556	0.615516	0.98323	101.86	46.14	78.71	300010	283879	215101	42.43	15.04	34.08	High	High	Not Found	High	Peak Found	Not Found	Peak Found	High	Peak Found
AAS96284.1	1807	nicotinate-nucleotide pyrophosphorylase	22.995	18	4	21	4	295	31.9	5.85	7.57	4	0	1.294	0.564	0.514	0.832428	0.754122	0.692567	32.66	45.52	42.73	1.09063e+06	708512	632040	7.95	12.73	22.26	High	High	High	High	High	Not Found	High	High	High
AAS97749.1	3279	nicotinate-nucleotide--dimethylbenzimidazole phosphoribosyltransferase	33.588	26	6	17	6	357	36.8	5.5	23.89	6	0	0.995	0.934	0.906	0.996749	0.993965	0.984176	73.99	63.15	69.38	1.65149e+06	930676	1.4732e+06	48.48	20.06	34.81	High	High	High	High	High	High	High	High	High
AAS96425.1	1949	nif-specific regulatory protein	93.729	40	15	102	15	529	59	7.34	127.72	15	0	0.901	0.896	0.934	0.942506	0.962482	0.972027	54.33	69.93	64.83	1.84734e+07	1.80248e+07	1.39851e+07	25.84	21.85	33.84	High	High	High	High	High	High	High	High	High
AAS94503.1	19	nigerythrin	27.662	26	5	20	5	202	22.1	5.59	27.77	5	0	1.091	4.072	3.623	0.952049	0.0194828	0.0911829	96.79	105.68	55.02	1.27677e+06	1.93998e+06	8.67279e+06	17.29	34.48	17.46	High	High	High	High	High	High	High	High	High
AAS95334.1	854	NirD protein, putative	18.403	15	3	16	3	176	19.8	7.72	15.78	3	0	0.749	2.598	2.361	0.784292	0.351314	0.477748	58.05	60.59	63.78	811760	1.11295e+06	1.94165e+06	29.26	18.39	11.99	High	High	High	High	High	High	High	High	High
AAS95768.1	1290	nitrate reductase, gamma subunit, putative	65.115	30	11	135	11	334	38.1	9.36	178.14	11	0	0.795	0.851	1.152	0.708029	0.938238	0.997949	50.74	61.33	70.31	2.9656e+07	2.82445e+07	2.49202e+07	7.98	25.87	11.5	High	High	High	High	High	High	High	High	High
AAS95146.1	665	nitrogen fixation protein nifU	32.864	35	7	22	7	281	31	5.2	17.27	7	0	2.007	4.173	2.38	0.192034	0.0330524	0.457509	88.55	113.73	73.15	593363	1.24411e+06	3.56641e+06	32.27	18.54	13.64	Peak Found	High	High	High	High	Peak Found	High	High	High
AAS95710.1	1232	nitrogen regulatory protein P-II	8.233	20	2	5	2	112	12.4	8.63	4.93	2	0	0.67	1.438	1.69	0.575169	0.91853	0.810319	42.33	47.98	78.48	1.82545e+06	1.02195e+06	2.99474e+06	5.76	17.79	25.83	High	Peak Found	Peak Found	High	High	Not Found	High	High	Peak Found
AAS97236.1	2764	nitroreductase family protein	23.66	37	6	34	6	172	18.9	6.92	36.03	6	0	1.019	0.666	0.484	0.971674	0.793085	0.397368	90.61	41.09	67.63	2.86073e+06	4.47403e+06	1.84357e+06	59.8	50.69	3.28	High	High	High	High	High	Peak Found	High	High	High
AAS96895.1	2422	nitroreductase family protein	23.365	29	5	20	5	169	18.6	6.54	17.41	5	0	0.471	1.861	1.779	0.178449	0.728533	0.768162	71.13	134.89	66.64	971174	584770	1.48064e+06	92.94	27.16	43.6	High	High	High	High	Peak Found	High	High	High	High
AAS95698.1	1220	nitroreductase family protein	30.108	28	6	20	6	274	30.8	7.62	23.57	6	0	0.966	2.429	1.665	0.971674	0.396075	0.820248	39.34	31.99	29.71	1.20862e+06	1.23499e+06	2.65413e+06	7.73	2.65	4.92	High	High	Peak Found	High	High	High	High	High	High
AAS96095.1	1617	nitroreductase family protein	18.215	20	4	20	4	197	21.5	5.66	21.74	4	0	1.001	1.385	1.389	0.997497	0.930904	0.925459	57.1	44.58	75.33	1.50416e+06	1.21441e+06	2.14639e+06	18.65	40.64	43.77	High	High	High	High	High	High	High	High	High
AAS97606.1	3136	nitroreductase family protein	34.306	34	7	39	7	218	24.8	6.92	44.9	7	0	1.115	1.168	1.049	0.93198	0.992001	0.999667	37.95	49.85	59.66	1.88392e+06	2.49733e+06	1.89066e+06	8.64	34.02	40.65	High	High	High	High	High	High	High	High	High
AAS96806.1	2333	nucleoside diphosphate kinase	37.889	42	5	24	5	139	15.2	5.85	37.04	5	0	0.65	1.262	1.167	0.523083	0.964364	0.984176	27.98	71.45	104.25	1.61357e+06	979240	1.94998e+06	4.21	10.24	31.3	High	High	Peak Found	High	High	Not Found	High	High	High
AAS97649.1	3179	octaprenyl-diphosphate synthase	41.914	28	9	34	9	321	34.6	5.57	26.69	9	0	0.885	0.801	0.85	0.928474	0.910737	0.915503	49.52	71.4	72.98	6.94396e+06	5.79311e+06	3.38487e+06	59.66	54.49	47.45	High	High	High	High	High	High	High	High	High
AAS94649.1	165	oligopeptide/dipeptide ABC transporter, ATP-binding protein	37.391	36	9	31	9	337	37.5	7.36	32.57	9	0	0.792	1.138	2.017	0.703983	0.993965	0.664969	70.98	42.98	77.92	1.83214e+07	1.76597e+06	1.0431e+07	75.36	14.71	40.39	High	High	High	High	High	High	High	High	High
AAS94650.1	166	oligopeptide/dipeptide ABC transporter, ATP-binding protein	36.198	28	9	21	9	328	35.7	6.92	25.07	9	0	1.204	1.462	1.035	0.882562	0.914747	0.999667	36.93	70.19	44.27	1.09099e+06	1.28617e+06	1.63615e+06	34.89	10.07	14.49	High	High	High	High	High	Not Found	High	High	High
AAS94653.1	169	oligopeptide/dipeptide ABC transporter, periplasmic oligopeptide/dipeptide-binding protein	219.538	48	25	252	25	520	58.2	8.56	458	25	0	1.308	3.312	2.264	0.395532	0.0712484	0.500551	49.85	51.06	47.29	2.62271e+07	3.6719e+07	7.64905e+07	8.78	9.76	22.38	High	High	High	High	High	High	High	High	High
AAS96557.1	2084	oligopeptide-binding protein, putative	43.1	29	10	27	10	565	64	6.11	34.04	10	0	1.464	1.399	0.902	0.479406	0.921572	0.972027	48.54	62.6	63.61	2.03529e+06	2.52473e+06	2.58174e+06	116.53	7.8	15.13	High	High	High	High	High	Peak Found	High	High	High
AAS95900.1	1422	OmpA family protein	427.329	75	29	4055	29	357	38.3	8.68	9002.45	29	0	0.951	1.019	1.015	0.984707	0.993965	0.990241	58.62	58.93	45.38	1.76855e+09	1.89187e+09	1.72374e+09	15.69	5.04	7.64	High	High	High	High	High	High	High	High	High
AAS95434.1	954	organic solvent tolerance protein, putative	154.58	40	27	134	27	764	88.7	5.16	144.03	27	0	0.97	1.235	1.183	0.996749	0.975395	0.997848	45.02	51.82	55.79	1.14452e+07	1.05955e+07	1.48072e+07	6.6	6.3	8.11	High	High	High	High	High	High	High	High	High
AAS95576.1	1096	ornithine carbamoyltransferase	58.687	38	10	68	10	300	33.9	5.68	108.41	10	0	1.379	1.71	1.195	0.26599	0.754122	0.997848	52.64	57.59	45.8	1.20043e+07	1.45355e+07	1.68995e+07	18.18	23.78	24.08	High	High	High	High	High	High	High	High	High
AAS97415.1	2943	orotate phosphoribosyltransferase	42.619	42	7	37	7	186	20.1	6.79	35.84	7	0	0.683	0.621	0.816	0.366368	0.707245	0.925459	68.23	62.05	54.51	4.13528e+06	2.4743e+06	2.6122e+06	18.02	33.91	26.93	High	High	High	High	High	High	High	High	High
AAS97568.1	3097	outer membrane efflux protein	91.009	42	17	88	17	439	48.2	6.96	104.7	17	0	1.003	1.136	1.315	0.966597	0.993965	0.972027	59.83	65.11	60.6	9.92983e+06	1.01994e+07	9.22546e+06	18.15	18.93	10.1	High	High	High	High	High	High	High	High	High
AAS96145.1	1668	outer membrane lipoprotein carrier protein, putative	6.716	12	2	6	2	225	25.4	5.52	0	2	0	1.514	5.36	3.136	0.781025	0.0502528	0.337365	32.2	46.16	32.56	126043	178197	678258	43.77	12.67	26.75	Not Found	High	Peak Found	High	Peak Found	Not Found	High	High	High
AAS96843.1	2370	outer membrane protein OmpH, putative	69.805	49	10	66	10	175	19.3	9.32	67.91	10	0	0.618	1.223	1.769	0.148463	0.988356	0.78416	71.9	67.62	37.76	5.65496e+06	3.1463e+06	8.94263e+06	23.09	11.75	6.77	High	High	High	High	High	Peak Found	High	High	High
AAS96575.1	2102	outer membrane protein, OMP85 family	6.152	6	3	5	3	776	82	5.3	0	3	0	0.715	1.514	1.242	0.820173	0.95245	0.984176	68.15	84.2	39.02	208264	200713	296419	39.43	22.48	4.65	Peak Found	High	Peak Found	Peak Found	High	Not Found	High	Peak Found	High
AAS96846.1	2373	outer membrane protein, OMP85 family	326.893	53	43	404	43	873	97.8	5.29	666.34	43	0	0.823	0.923	1.098	0.791465	0.966741	0.999667	56.26	67.78	48.06	9.13931e+07	7.35479e+07	8.494e+07	13.6	10.09	10.17	High	High	High	High	High	High	High	High	High
AAS96537.1	2064	oxidoreductase, 2-nitropropane dioxygenase family	62.975	40	14	58	14	373	40.2	6.65	65.11	14	0	0.871	0.208	0.248	0.900092	0.00276957	0.0133426	55.84	42.41	60.54	1.21463e+07	1.19441e+07	2.74151e+06	15.14	16.04	23.75	High	High	High	High	High	High	High	High	High
AAS97542.1	3071	oxidoreductase, FAD/iron-sulfur cluster-binding domain protein	306.604	47	47	310	47	1187	130.6	6.98	509.08	47	0	1.639	2.671	1.508	0.0337521	0.206122	0.898984	55.66	51.31	54.72	2.41712e+07	4.1962e+07	5.54554e+07	1.07	14.31	15.99	High	High	High	High	High	High	High	High	High
AAS94736.1	253	oxidoreductase, FAD/iron-sulfur cluster-binding domain protein	465.468	65	56	740	56	941	103	7.46	1107.98	56	0	0.968	1.102	1.109	0.997497	0.993965	0.999667	52.99	53.3	53.39	1.42271e+08	1.52651e+08	1.55749e+08	5.42	1.75	1.18	High	High	High	High	High	High	High	High	High
AAS96833.1	2360	oxidoreductase, FAD/NAD-binding family	26.427	24	5	35	5	268	28.9	5.45	47.3	5	0	0.83	0.735	0.64	0.8196	0.870104	0.743163	62.93	40.94	44.97	2.85477e+06	3.09777e+06	2.25415e+06	29.41	10.82	26.14	High	High	High	High	High	High	High	High	High
AAS96943.1	2471	oxidoreductase, selenocysteine-containing	28.882	19	7	25	7	432	48.6	5.38	25.23	7	0	0.932	1.344	1.499	0.957334	0.949453	0.905221	36.21	24.69	45.37	2.20252e+06	2.46597e+06	3.89823e+06	7.01	20.57	12.59	High	High	High	High	High	Peak Found	High	High	High
AAS97607.1	3137	oxidoreductase, short chain dehydrogenase/reductase family	10.336	10	2	8	2	258	26.8	5.02	5.12	2	0	0.434	0.459	1.056	0.146119	0.568417	0.998377	29.63	13.49	29.63	790054	343009	513372	5.11	34.96	11.95	Peak Found	High	Peak Found	High	Peak Found	Not Found	High	Peak Found	High
AAS96261.1	1784	oxidoreductase, short-chain dehydrogenase/reductase family	52.102	46	9	65	9	253	27.2	7.06	83.13	9	0	0.751	1.635	1.86	0.563668	0.804124	0.737327	50.89	56.99	64.21	1.16459e+07	8.66213e+06	1.42858e+07	25.74	14.21	20.34	High	High	High	High	High	High	High	High	High
AAS96010.1	1532	pantetheine-phosphate adenylyltransferase	11.39	16	3	10	3	186	21.1	5.97	11.57	3	0	0.898	0.976	0.928	0.938474	0.993965	0.98323	135.35	127.15	103.73	2.14958e+06	2.46564e+06	1.97534e+06	44.07	81.39	14.73	High	High	High	Peak Found	High	High	High	Peak Found	High
AAS96920.1	2448	pantoate--beta-alanine ligase	51.315	34	9	30	9	283	31.3	6.61	42.44	9	0	1.115	4.444	3.679	0.944842	0.0169265	0.0795813	80.6	45.83	52.3	1.48012e+06	1.41754e+06	6.19558e+06	40.4	8.78	6.78	High	High	High	High	Peak Found	Not Found	High	High	High
AAS94446.1	A0002	ParA family protein	21.357	21	6	24	6	272	30.1	5.71	19.74	6	0	0.786	0.399	0.533	0.703983	0.189429	0.538701	80.19	48.25	95.41	4.76892e+06	3.93508e+06	1.513e+06	25.35	24.7	23.16	High	High	High	High	High	High	High	High	High
AAS96548.1	2075	ParA family protein	42.235	40	10	55	10	258	28.5	8.78	64.34	10	0	0.958	0.726	0.725	0.99509	0.819244	0.818461	65.13	58.59	64.89	6.40343e+06	1.0109e+07	4.24957e+06	40.81	35.69	3.64	High	High	High	High	High	High	High	High	High
AAS97827.1	3358	ParA family protein	23.205	21	6	34	6	276	30.6	6.92	24.55	6	0	0.719	0.853	1.674	0.443164	0.940685	0.843364	82.36	76.2	96.35	6.733e+06	2.99882e+06	6.8002e+06	22.3	46.19	4.44	High	High	High	High	High	High	High	High	High
AAS97597.1	3127	paraquat-inducible protein B	59.668	23	10	57	10	543	60.2	6.57	77.31	10	0	1.112	0.746	0.849	0.831474	0.870056	0.925947	43.89	46.19	60.94	8.05107e+06	8.40686e+06	6.93512e+06	6.83	14.81	3.38	High	High	High	High	High	High	High	High	High
AAS97829.1	3360	ParB family protein	66.671	44	12	53	12	304	33.5	8.97	61.56	12	0	1.191	0.923	0.643	0.747365	0.966741	0.712386	63.9	86.4	72.16	5.78164e+06	6.64595e+06	4.04689e+06	11.72	23.21	50.15	High	High	High	High	High	High	High	High	High
AAS97724.1	3254	PDZ domain protein	48.561	32	9	39	9	454	47	6.95	30.72	9	0	1.05	2.179	2.057	0.971674	0.479058	0.632937	55.99	51.3	26.81	2.05791e+06	1.859e+06	3.87299e+06	11.05	10.65	9.89	High	High	High	High	High	Peak Found	High	High	High
AAS95114.1	633	penicillin-binding protein	73.602	22	16	61	16	807	88.6	7.25	64.89	16	0	0.846	1.263	1.29	0.832815	0.964364	0.98323	60.3	53.57	57.09	5.21531e+06	4.50053e+06	6.1518e+06	2.89	17.91	9.39	High	High	High	High	High	High	High	High	High
AAS95908.1	1430	peptidase, M16 family	85.424	27	17	82	17	868	95.6	6.18	76.11	17	0	0.689	1.378	1.714	0.354096	0.937226	0.804386	90.01	47.93	67.05	6.14059e+06	8.11706e+06	7.47821e+06	15.31	12.67	7.54	High	High	High	High	High	Peak Found	High	High	High
AAS95421.1	941	peptidase, M16 family	164.19	34	31	198	31	964	106.4	5.12	260.35	31	0	1.321	1.265	1.07	0.368278	0.965359	0.99805	41.42	53.61	47.41	3.03157e+07	3.29201e+07	3.61637e+07	64.47	17.37	15.4	High	High	High	High	High	High	High	High	High
AAS96852.1	2379	peptidase, M16 family, putative	178.739	39	33	127	33	1005	109.7	7.05	173.91	33	0	0.432	0.617	1.291	0.000122987	0.652148	0.976855	91.4	70.96	89.33	1.66916e+07	2.39787e+07	9.66316e+06	21.87	40.66	20.19	High	High	High	High	High	High	High	High	High
AAS97356.1	2884	peptidase, M18 family	59.326	29	11	55	11	467	51.6	5.63	74.79	11	0	1.358	2.111	1.731	0.475264	0.479081	0.796345	39.32	44.84	57	3.79581e+06	5.26921e+06	8.15517e+06	11.88	20.49	5.7	High	High	High	High	High	High	High	High	High
AAS97047.1	2575	peptidase, M20/M25/M40 family	13.517	20	5	11	5	366	39.5	5.6	1.88	5	0	1.637	2.834	1.724	0.636969	0.361615	0.804386	75.95	89.83	62.6	507230	314034	1.57629e+06	20.28	0.74	55.51	High	High	Peak Found	High	Peak Found	Peak Found	High	High	High
AAS96327.1	1851	peptidase, M23/M37 family	91.716	38	18	104	18	440	48.3	7.37	152.09	18	0	0.906	1.695	2.277	0.942506	0.76656	0.495158	60.93	57.25	76.83	7.76295e+06	6.79582e+06	1.38438e+07	13.79	6.84	20.52	High	High	High	High	High	High	High	High	High
AAS94779.1	296	peptidase, M24 family	61.805	35	11	34	11	356	39.9	5.67	43.5	11	0	0.94	2.685	3.108	0.96174	0.223188	0.176184	59.91	64.19	59.02	2.25746e+06	2.11857e+06	5.29994e+06	13.31	10.47	10.84	High	High	High	High	High	High	High	High	High
AAS95480.1	1000	peptidase, M24 family	31.128	15	6	28	6	407	44.2	6.28	31.07	6	0	1.093	1.673	1.584	0.952049	0.816266	0.864178	31.47	38.12	32.75	1.58286e+06	1.82884e+06	3.35932e+06	12.07	19.97	25.62	High	High	High	High	High	High	High	High	High
AAS95239.1	759	peptidase, M29 family	31.63	22	6	16	6	401	44.3	8	20.54	6	0	1.214	2.874	0.526	0.882495	0.280251	0.675836	22.41	64.43	36.91	1.07709e+06	982545	1.51726e+06	12.24	20.59	44.89	High	High	High	High	High	High	High	High	High
AAS96966.1	2494	peptidase, M48 family	38.054	32	6	28	6	286	30.3	6.7	27.76	6	0	0.582	0.974	2.726	0.122455	0.993965	0.308507	69.89	45.88	85.98	3.3584e+06	2.23005e+06	3.17046e+06	27.33	12.16	16.09	High	High	High	High	High	High	High	High	High
AAS97158.1	2686	peptidase, S24 family	22.115	31	7	23	7	260	28.4	6.04	9.2	7	0	1.316	1.737	1.465	0.832815	0.819244	0.896116	36.52	49.89	38.09	605807	718959	1.64277e+06	9.66	19.97	7.14	High	High	High	High	High	Peak Found	High	High	High
AAS95135.1	654	peptidase, U32 family	11.895	9	3	7	3	408	44.5	7.55	5.02	3	0	0.841	1.328	1.587	0.942506	0.990179	0.915503	13.98	12.98	12.18	141783	117920	359741	8.32	17.32	26.83	High	High	Not Found	Not Found	High	Not Found	Peak Found	High	High
AAS97782.1	3314	peptidase, U32 family	102.951	33	20	110	20	658	73.4	9.17	148.7	20	0	1.085	1.057	0.976	0.870643	0.993965	0.98323	47.56	39.68	56.27	1.20611e+07	3.11759e+07	1.35368e+07	10.08	5.7	1.9	High	High	High	High	High	High	High	High	High
AAS97748.1	3278	peptidase/PDZ domain protein	55.524	27	10	37	10	518	54.3	8.57	39.82	10	0	0.961	2.583	2.151	0.971674	0.257802	0.5866	55.04	63.84	42.95	2.24074e+06	1.23166e+06	4.0423e+06	10.22	2.8	12.52	High	High	High	High	High	Peak Found	High	High	High
AAS95946.1	1468	peptidase/PDZ domain protein	164.395	51	23	190	23	482	51.6	7.17	327.9	23	0	0.73	1.423	1.765	0.474476	0.915515	0.774709	67.53	64.84	63.33	4.56777e+07	3.65949e+07	5.34732e+07	32.84	19.7	11.84	High	High	High	High	High	High	High	High	High
AAS97386.1	2914	peptide chain release factor 1	34.649	20	6	29	6	357	40	5.86	35.23	6	0	1.042	2.319	1.834	0.971674	0.457185	0.733255	63.14	62.2	73.99	1.43379e+06	1.55637e+06	2.14933e+06	26.98	22.48	12.17	High	High	High	High	High	High	High	High	High
AAS97587.1	3116	peptide chain release factor 3	27.721	18	6	19	6	529	59.6	6.49	13.28	6	0	0.928	0.854	0.917	0.953873	0.964364	0.985375	62.59	46.27	53.71	1.44081e+06	1.35443e+06	1.18535e+06	23.83	29.13	4.64	High	High	Peak Found	High	Peak Found	Peak Found	High	High	High
AAS97575.1	3104	peptidoglycan-associated lipoprotein, putative	155.9	55	11	465	11	167	18.5	8.69	937.39	11	0	0.715	1.237	1.792	0.406391	0.974092	0.764811	68.42	67.2	56.94	1.2846e+08	9.57589e+07	1.65652e+08	12.25	17.79	12.56	High	High	High	High	High	High	High	High	High
AAS95948.1	1470	peptidyl-prolyl cis-trans isomerase C	32.129	70	5	31	5	94	10.2	5.92	47.86	5	0	1.234	1.824	1.16	0.832779	0.717955	0.997848	85.08	43.43	62.94	1.69665e+06	2.08533e+06	2.90725e+06	44.76	30.76	16.75	High	High	High	High	High	High	High	High	High
AAS96377.1	1901	peptidyl-prolyl cis-trans isomerase domain protein	52.757	38	10	40	10	348	38.7	7.91	37.92	10	0	1.102	1.284	0.809	0.875868	0.964364	0.896116	76.51	98.99	72.75	5.61375e+06	7.47576e+06	6.76895e+06	22.37	25.44	60	High	High	High	High	High	High	High	High	High
AAS97041.1	2569	peptidyl-prolyl cis-trans isomerase, FKBP-type	16.433	28	3	12	3	141	15.2	4.2	8.29	3	0	1.588	1.409	0.537	0.652892	0.953611	0.730157	104.18	65.28	21.48	391950	774489	801163	55.48	42.15	55.85	High	High	High	High	High	Not Found	High	High	High
AAS95545.1	1065	peptidyl-prolyl cis-trans isomerse domain protein	184.857	45	28	236	28	629	68.5	6.04	381.85	28	0	0.751	0.736	0.989	0.563668	0.836673	0.984176	58.87	48.22	55.62	4.87419e+07	4.5175e+07	5.32455e+07	26.16	12.08	23.17	High	High	High	High	High	High	High	High	High
AAS96246.1	1769	periplasmic [Fe] hydrogenase, large subunit	69.077	42	15	82	15	421	45.9	7.3	91.44	15	0	1.29	0.877	0.683	0.440342	0.953611	0.763948	63.67	69.63	59.36	1.48269e+07	3.18764e+07	1.46632e+07	19.49	32.28	13.16	High	High	High	High	High	High	High	High	High
AAS96247.1	1770	periplasmic [Fe] hydrogenase, small subunit	11.47	27	3	13	3	123	13.6	9.67	9.61	3	0	0.357	0.41	0.703	0.00124875	0.370763	0.882493	43.29	97.47	120.03	1.779e+06	2.16034e+06	736190	71.21	33.62	56.3	High	High	High	High	High	High	High	Peak Found	High
AAS96398.1	1922	periplasmic [NiFe] hydrogenase, large subunit, isozyme 1	165.027	43	18	239	18	566	62.7	7.96	325.59	18	0	1.366	1.799	1.4	0.280845	0.707245	0.947979	58.94	54.15	70.91	3.345e+07	4.65951e+07	5.63349e+07	28.72	9	22.5	High	High	High	High	High	High	High	High	High
AAS96998.1	2526	periplasmic [NiFe] hydrogenase, large subunit, isozyme 2	79.87	35	14	49	14	549	61.2	7.59	67.49	14	0	1.011	3.441	3.494	0.987075	0.0611192	0.112728	90.73	73.48	67.34	3.11482e+06	2.55178e+06	9.20702e+06	18.34	25.76	44.89	High	High	High	High	High	High	High	High	High
AAS96397.1	1921	periplasmic [NiFe] hydrogenase, small subunit, isozyme 1	38.823	24	5	46	5	317	34.2	5.97	89.28	5	0	1.116	2.033	2.488	0.925408	0.537163	0.405348	79.39	54.31	78.31	2.29308e+06	2.50134e+06	6.18685e+06	35.35	58.1	21.92	High	High	Peak Found	High	High	High	High	High	High
AAS96394.1	1918	periplasmic [NiFeSe] hydrogenase, large subunit, selenocysteine-containing	336.159	68	36	411	36	510	55.8	8.72	797.68	36	0	1.076	1.91	1.646	0.883023	0.630332	0.833374	60.33	68.52	80.22	7.63151e+07	8.5585e+07	1.47305e+08	9.26	6.78	17.1	High	High	High	High	High	High	High	High	High
AAS96393.1	1917	periplasmic [NiFeSe] hydrogenase, small subunit	36.231	31	6	58	6	317	33.9	5.76	62.28	6	0	1.054	2.324	1.566	0.920602	0.356562	0.875192	61.52	77.76	39.68	1.12654e+07	8.28848e+06	1.47949e+07	42.41	28.37	11.88	High	High	High	High	High	Peak Found	High	High	High
AAS96139.1	1662	permease, putative	13.144	12	4	12	4	380	41.9	8.63	7.55	4	0	0.449	1.847	5.301	0.0598484	0.689611	0.0143678	87.08	60.52	95.99	2.50809e+06	356897	4.13733e+06	84.48	22.62	14.56	High	High	High	Peak Found	High	Peak Found	High	High	High
AAS97843.1	3374	permease, putative	5.325	10	2	5	2	277	30.4	9.58	2.22	2	0	1.408	0.765	0.608	0.814027	0.93275	0.833374	43.25	42.75	36.04	445416	418669	444992	23.58	23.27	51.57	Peak Found	Peak Found	High	High	High	High	Peak Found	Peak Found	High
AAS96140.1	1663	permease, putative	7.546	5	2	7	2	360	39.3	8.15	9.28	2	0	0.668	1.172	1.59	0.714686	0.993965	0.875192	17.89	34.35	17.6	606341	326606	783441	15.84	18.41	14.41	High	Peak Found	Not Found	High	Peak Found	Not Found	High	High	High
AAS97459.1	2988	phage shock protein A	59.395	51	12	85	11	221	25.5	5.66	148.75	12	1	0.781	0.208	0.294	0.665587	0.00151843	0.0372388	61.18	98.58	76.8	1.81513e+07	1.89743e+07	7.01237e+06	43.62	12.32	17.8	High	High	High	High	High	High	High	High	High
AAS97457.1	2986	phage shock protein C	4.695	12	2	6	2	140	16.5	10.17	0	2	0	0.607	0.432	0.697	0.539852	0.503274	0.905221	69.01	76.31	20.05	748331	494133	362436	34.01	16.67	12.05	Peak Found	High	Peak Found	Peak Found	High	Not Found	Peak Found	High	High
AAS96093.1	1615	phenylacetate-coenzyme A ligase	101.273	44	23	139	23	435	48.6	6.81	155.56	23	0	1.009	0.809	0.778	0.959112	0.915097	0.869763	47.09	53.32	62.2	1.95518e+07	2.03257e+07	1.36368e+07	11.39	13.54	8.75	High	High	High	High	High	High	High	High	High
AAS97207.1	2735	phenylacetate-coenzyme A ligase	56.709	28	12	69	12	432	48.8	6.33	78.66	12	0	1.032	0.889	0.786	0.953718	0.958484	0.877484	73.29	59.88	76.49	5.92828e+06	6.31333e+06	6.4644e+06	18.44	13.79	20.22	High	High	High	High	High	High	High	High	High
AAS94972.1	489	phenylacetate-coenzyme A ligase	62.021	27	10	64	10	432	48	6.54	125.69	10	0	1.139	0.931	0.835	0.777515	0.972641	0.915503	46.5	40.98	49.61	7.61224e+06	8.81142e+06	7.45559e+06	7.85	7.19	9.77	High	High	High	High	High	High	High	High	High
AAS97723.1	3253	phenylacetate-coenzyme A ligase, putative	109.051	43	18	161	17	421	48.2	8.12	207.78	18	1	0.913	0.997	1.037	0.952046	0.993965	0.997848	39.67	65.67	56.57	1.99098e+07	1.98002e+07	1.63703e+07	5.15	19.38	10.64	High	High	High	High	High	High	High	High	High
AAS97006.1	2534	phenylalanyl-tRNA synthetase, alpha subunit	45.716	30	10	64	10	345	38.5	5.83	88.34	10	0	0.959	1.127	1.284	0.996749	0.993965	0.978407	75.43	71.13	80.46	7.01313e+06	9.68081e+06	1.09863e+07	44.9	23.69	21.86	High	High	High	High	High	High	High	High	High
AAS97005.1	2533	phenylalanyl-tRNA synthetase, beta subunit	210.845	43	30	228	30	798	87.7	5.86	400.5	30	0	0.922	0.878	0.977	0.957487	0.953886	0.98323	54.9	70.25	62.92	3.23558e+07	3.08665e+07	2.85716e+07	17.66	4.48	20.07	High	High	High	High	High	High	High	High	High
AAS96357.1	1881	phoH family protein	42.53	25	7	37	7	338	37.1	7.64	52.12	7	0	1.12	0.634	0.53	0.85554	0.718486	0.466936	36.16	49.79	45.49	5.33782e+06	7.34649e+06	3.65268e+06	13.82	15.31	8.49	High	High	High	High	High	High	High	High	High
AAS94925.1	442	phoH-related protein	119.651	48	18	100	18	398	44.7	7.3	121.85	18	0	2.21	9.23	3.769	0.00128024	5.29638e-06	0.0653708	54.69	65.71	59.28	2.94588e+06	5.07519e+06	2.18087e+07	11.32	15.69	25.29	High	High	High	High	High	High	High	High	High
AAS95564.1	1084	phosphate ABC transporter, ATP-binding protein	132.152	76	17	168	17	255	28.8	6.24	278.31	17	0	1.085	1.948	1.848	0.870738	0.596817	0.738339	58.69	59.83	68.57	2.37411e+07	2.96322e+07	4.28303e+07	8.59	0.65	23.07	High	High	High	High	High	High	High	High	High
AAS97136.1	2664	phosphate ABC transporter, ATP-binding protein, putative	30.469	20	4	21	4	288	31.3	8.16	9.32	4	0	1.142	1.083	0.95	0.935944	0.993965	0.997848	48.59	43.79	51.55	1.11062e+06	1.13951e+06	1.20645e+06	29.89	14.11	15.09	High	High	Peak Found	High	High	Not Found	High	High	High
AAS96949.1	2477	phosphate ABC transporter, periplasmic phosphate-binding protein PstS	162.341	75	16	190	16	270	28.5	8.7	356.93	16	0	1.482	13.654	7.898	0.135537	2.2525e-08	0.000259323	52.98	80.92	74.41	6.25493e+06	9.88748e+06	6.99631e+07	4.78	10.98	40.92	High	High	High	High	High	High	High	High	High
AAS97139.1	2667	phosphate ABC transporter, periplasmic phosphate-binding protein, putative	78.614	57	11	58	11	292	30	9.39	85.96	11	0	1.956	5.502	4.474	0.0652076	0.00204259	0.0251339	58.53	67.82	68.34	2.10002e+06	2.34037e+06	1.11306e+07	23.1	16.62	32.9	High	High	Peak Found	High	High	High	High	High	High
AAS97500.1	3029	phosphate acetyltransferase	243.237	56	31	251	31	704	76.8	5.68	438.66	31	0	1.146	2.16	2.076	0.763573	0.455894	0.621209	61.36	79.17	82.88	3.18976e+07	3.13364e+07	4.96328e+07	12.45	9.24	20.98	High	High	High	High	High	High	High	High	High
AAS95563.1	1083	phosphate regulon transcriptional regulator PhoB	79.58	49	9	100	9	229	25.9	5.76	136.86	9	0	1.062	2.341	1.866	0.912303	0.348459	0.735961	57.87	72.73	80.86	7.31596e+06	9.41741e+06	2.05719e+07	1.25	54.02	53.74	High	High	High	High	High	High	High	High	High
AAS95565.1	1085	phosphate transport system protein PhoU	71.157	45	11	74	11	221	24.7	6.04	123.3	11	0	1.285	1.633	1.261	0.450691	0.805748	0.98323	77.86	73.61	63.64	1.04423e+07	9.38997e+06	1.17163e+07	33.39	13.32	27.18	High	High	High	High	High	High	High	High	High
AAS97450.1	2979	phosphatidylserine decarboxylase-related protein	59.942	32	9	67	9	217	23.9	7.24	115.51	9	0	0.983	1.208	0.983	0.975928	0.992001	0.984176	46.96	53.61	66.08	9.08933e+06	9.5427e+06	1.08323e+07	10.48	20.32	20.42	High	High	High	High	High	High	High	High	High
AAS96309.1	1833	phosphoenolpyruvate synthase, putative	690.275	63	76	987	76	1191	132.6	6.38	1944.25	76	0	0.905	0.901	0.979	0.944749	0.964364	0.98323	61.52	62.7	64.99	1.94633e+08	1.84307e+08	1.67384e+08	14.54	12.09	9.22	High	High	High	High	High	High	High	High	High
AAS97684.1	3214	phosphoenolpyruvate synthase-related protein	70.016	25	16	50	16	884	95	5.48	28.24	16	0	1.5	0.815	0.618	0.210187	0.930904	0.657907	65.98	83.21	77.62	3.0688e+06	6.52149e+06	2.43269e+06	32.74	5.1	16.46	High	High	High	High	High	High	High	High	High
AAS94636.1	152	phosphoenolpyruvate synthase-related protein	90.409	25	18	69	18	853	93.7	6.28	73.87	18	0	1.382	0.858	0.626	0.400381	0.955519	0.677894	52.46	69.35	60.2	4.61255e+06	6.60035e+06	4.30312e+06	28.3	18.16	26.56	Not Found	High	Peak Found	High	Peak Found	Not Found	High	High	High
AAS97707.1	3237	phosphoenolpyruvate synthase-related protein	29.169	16	8	19	8	803	86.2	5.68	5.71	8	0	1.067	0.991	0.869	0.96948	0.993965	0.98323	40.78	48.96	46.06	1.0996e+06	933158	935379	16.63	6.6	0.77	High	High	High	High	High	High	High	High	High
AAS95309.1	829	phosphoenolpyruvate-protein phosphotransferase	45.12	21	10	24	10	590	65.3	5.48	22.99	10	0	0.881	0.846	0.973	0.926251	0.956732	0.997949	44.7	56.11	70.01	2.27866e+06	1.82567e+06	1.87538e+06	27.25	13.77	10.53	High	High	High	High	High	High	High	High	High
AAS95906.1	1428	phosphoglucomutase, alpha-D-glucose phosphate-specific	55.975	28	12	27	12	551	59.4	6.2	32.45	12	0	1.136	1.977	2.083	0.936868	0.631304	0.616353	65.21	49.66	40.3	1.99954e+06	1.06824e+06	3.0468e+06	6.95	4.94	37.95	High	High	Peak Found	High	Peak Found	Peak Found	High	High	High
AAS95760.1	1282	phosphoglucosamine mutase	125.443	50	19	121	19	450	49.2	6.18	156.86	19	0	0.847	1.029	1.222	0.847249	0.993965	0.985375	55.29	65.95	77.55	1.28215e+07	1.15934e+07	1.17605e+07	40.81	108.61	13.86	High	High	High	High	High	High	High	High	High
AAS97001.1	2529	phosphoglycerate kinase	166.784	59	21	251	21	393	41.4	5.44	368.47	21	0	0.995	0.402	0.362	0.971674	0.148579	0.114882	61.95	61.85	71.86	1.09619e+08	1.26185e+08	9.2817e+07	50.91	42.79	7.2	High	High	High	High	High	High	High	High	High
AAS97407.1	2935	phosphoglycerate mutase	45.967	40	7	51	7	250	28.2	6.24	49.95	7	0	1.041	0.537	0.665	0.957487	0.503274	0.737184	47.81	57.87	90.64	5.32124e+06	5.18569e+06	2.95411e+06	2.21	11.3	28.57	High	High	High	High	High	High	High	High	High
AAS96097.1	1619	phosphoglycerate mutase, 2,3-bisphosphoglycerate-independent	32.494	20	8	19	7	511	54.1	5.44	19.42	8	0	1.089	0.514	0.56	0.95452	0.631048	0.752573	76.26	55.47	128.95	1.6205e+06	1.1986e+06	772857	28	50.16	1.08	High	High	High	High	High	High	High	Peak Found	High
AAS95166.1	685	phosphomannomutase	47.011	22	9	41	9	453	49.7	5.9	49.79	9	0	1.087	0.594	0.542	0.929563	0.65788	0.535715	49.23	69.83	51.56	4.36682e+06	4.25061e+06	2.16907e+06	16.51	4.05	6.54	High	High	High	High	High	High	High	High	High
AAS95411.1	931	phosphomethylpyrimidine kinase	20.363	15	3	15	3	268	27.6	6.25	20.22	3	0	1.243	0.939	0.48	0.833716	0.993965	0.562605	50.25	75.46	43.91	1.55007e+06	1.85422e+06	1.03257e+06	52.2	23.26	23.85	High	High	High	High	High	High	High	High	High
AAS96412.1	1936	phosphonate ABC transporter, ATP-binding protein	92.55	56	12	112	12	265	29.4	7.47	166.07	12	0	1.06	0.807	0.815	0.914489	0.914747	0.901583	73.1	59.65	65.1	1.78003e+07	1.63888e+07	1.4877e+07	8.89	8.36	11.58	High	High	High	High	High	High	High	High	High
AAS96413.1	1937	phosphonate ABC transporter, periplasmic phosphonate-binding protein, putative	160.993	62	20	139	20	337	37.1	7.34	208.34	20	0	1.196	3.254	2.425	0.652968	0.0787441	0.412015	62.75	67.3	55.12	1.14045e+07	1.11044e+07	3.61051e+07	28.18	35.79	6.51	High	High	High	High	High	High	High	High	High
AAS96411.1	1935	phosphonate ABC transporter, permease protein	17.475	16	4	27	4	265	28.6	9.19	24.76	4	0	0.738	0.632	0.852	0.564563	0.722096	0.944024	39.73	34.35	68.31	3.94037e+06	3.03419e+06	2.67418e+06	5.86	15.54	10.47	High	High	High	High	High	High	High	High	High
AAS96410.1	1934	phosphonate ABC transporter, permease protein	27.641	16	4	20	4	266	29.3	8.32	21.56	4	0	0.831	0.934	1.11	0.832815	0.98824	0.997848	48.65	86.66	28.63	2.95908e+06	1.88309e+06	1.79038e+06	66.4	20.58	58.77	High	High	Peak Found	High	High	High	High	High	High
AAS97822.1	3353	phosphopantothenoylcysteine decarboxylase/phosphopantothenate--cysteine ligase	51.828	24	9	45	9	404	43.1	6.73	62.98	9	0	0.878	0.886	0.792	0.900092	0.964364	0.893404	47.64	52.78	50.29	3.34874e+06	3.50389e+06	2.95075e+06	15.95	6.79	9.24	High	High	High	High	High	High	High	High	High
AAS94971.1	488	phosphoribosylamine--glycine ligase	80.227	50	14	58	14	424	44.7	5.11	51.3	14	0	1.528	2.001	1.029	0.208461	0.56252	0.989483	57.08	70.31	51.38	3.20484e+06	5.53794e+06	5.74522e+06	17.73	19.59	10.86	High	High	High	High	High	High	High	High	High
AAS94970.1	487	phosphoribosylaminoimidazole carboxylase, catalytic subunit	36.641	45	7	62	7	166	17.2	6.55	48.83	7	0	0.834	1.775	2.42	0.824746	0.722096	0.437333	55.52	68.14	85.09	3.19779e+06	2.65968e+06	4.58504e+06	12.88	9.15	28.9	High	High	High	High	High	Peak Found	High	High	High
AAS97676.1	3206	phosphoribosylaminoimidazolecarboxamide formyltransferase, putative	128.336	50	19	113	19	510	54.6	8.79	174.83	19	0	1.153	2.52	2.339	0.74978	0.262354	0.461158	56.76	50.4	47.67	9.22817e+06	9.68033e+06	2.25821e+07	16.03	13.88	21.33	High	High	High	High	High	High	High	High	High
AAS95275.1	795	phosphoribosylaminoimidazole-succinocarboxamide synthase	70.007	49	14	72	14	298	33.4	5.49	119.23	14	0	1.054	1.524	1.383	0.920602	0.870056	0.950814	65.41	54.66	52.72	7.89641e+06	8.97296e+06	1.46297e+07	21.22	18.48	20.97	High	High	High	High	High	High	High	High	High
AAS95518.1	1038	phosphoribosylformimino-5-aminoimidazole carboxamide ribotide isomerase	51.274	47	10	49	10	249	26.5	4.91	38.59	10	0	1.034	0.826	0.94	0.966597	0.937226	0.974669	52.71	51.32	54	4.6866e+06	3.86362e+06	3.95207e+06	9.13	4.48	19.38	High	High	High	High	High	High	High	High	High
AAS95884.1	1406	phosphoribosylformylglycinamidine cyclo-ligase	75.157	34	13	108	13	350	37.9	5	136.98	13	0	1.057	1.097	1.079	0.918347	0.993965	0.998377	53.07	56.89	80.11	9.10271e+06	9.87865e+06	1.00869e+07	12.18	7.04	22.84	High	High	High	High	High	High	High	High	High
AAS96100.1	1622	phosphoribosylformylglycinamidine synthase I	26.132	23	5	32	5	269	29.4	6.4	38.06	5	0	1.064	1.527	1.851	0.957487	0.870104	0.737328	101.16	57.35	122.81	1.8286e+06	2.5838e+06	2.34306e+06	29.37	27.17	28.05	High	High	High	High	High	High	High	High	High
AAS97651.1	3181	phosphoribosylformylglycinamidine synthase II	153.165	36	26	146	26	993	107.6	5.26	150.35	26	0	0.849	0.85	0.882	0.851801	0.937226	0.949735	61.68	68.77	75.3	1.64166e+07	1.46221e+07	1.39839e+07	5.56	14.71	22.81	High	High	High	High	High	High	High	High	High
AAS95203.1	723	phosphoribosylglycinamide formyltransferase 2	71.77	46	13	74	13	393	41.9	5.33	106.54	13	0	1.241	0.826	0.784	0.561173	0.928503	0.876719	53.93	84.57	84.1	7.70099e+06	1.04269e+07	5.81511e+06	7.19	25.18	18.83	High	High	High	High	High	High	High	High	High
AAS95108.1	627	phosphotransbutyrylase	66.802	52	11	43	11	343	35.1	5.77	55.04	11	0	1.089	1.408	1.495	0.922412	0.915515	0.91925	63.4	68.66	79.1	4.06819e+06	6.32736e+06	4.48992e+06	16.16	7.23	27.7	High	High	High	Peak Found	High	High	High	High	High
AAS95953.1	1475	PhoU family protein	60.218	55	13	81	13	225	25.2	4.7	92.15	13	0	0.97	3.447	3.428	0.983954	0.0564651	0.107463	53.46	72.96	79.61	5.19958e+06	5.37725e+06	1.38642e+07	12.01	12.42	37.38	High	High	High	High	High	High	High	High	High
AAS96130.1	1653	polyA polymerase family protein	46.205	14	11	24	11	904	100.3	5.92	21.48	11	0	1.414	1.012	0.653	0.570384	0.993965	0.796345	41.68	40.66	64.82	1.78724e+06	2.6155e+06	1.77695e+06	12.67	5.34	4.21	High	High	High	High	High	High	High	High	High
AAS94582.1	98	polyamine ABC transporter, ATP-binding protein	13.337	15	4	15	4	368	41.3	5.22	6.13	4	0	0.566	0.937	1.45	0.352635	0.993965	0.905221	64.86	82.9	56.9	1.14751e+06	758965	1.30033e+06	27.64	48.33	13.06	High	High	Peak Found	High	High	Peak Found	High	High	High
AAS94579.1	95	polyamine ABC transporter, periplasmic polyamine-binding protein	40.667	25	7	26	7	345	38.8	5.81	29.67	7	0	1.978	4.027	1.813	0.164981	0.0415111	0.762056	77.95	67.59	51.07	781170	2.21226e+06	3.28755e+06	41.3	43.78	6.1	High	High	High	High	High	Peak Found	High	High	High
AAS94581.1	97	polyamine ABC transporter, permease protein	5.559	8	2	6	2	295	32.7	9.41	1.69	2	0	0.799	0.921	1.084	0.879583	0.990619	0.99805	17.75	37.54	39.54	375570	316354	352540	12.21	13.18	29.36	Peak Found	High	Peak Found	Peak Found	High	Peak Found	High	Peak Found	High
AAS97835.1	3366	polypeptide deformylase	45.104	44	6	27	6	171	19.4	5.26	25.1	6	0	0.946	1.089	1.208	0.96174	0.993965	0.984467	48.05	44.04	43.87	2.75868e+06	2.50024e+06	3.1779e+06	7.03	17.11	29.37	High	High	Peak Found	High	High	High	High	High	High
AAS94985.1	503	polyribonucleotide nucleotidyltransferase	334.922	49	39	673	39	760	82.1	5.73	1239.96	39	0	0.928	1.078	1.061	0.966597	0.999616	0.997949	60.1	60.88	56.21	1.50638e+08	1.4885e+08	1.57882e+08	2.19	5.43	0.4	High	High	High	High	High	High	High	High	High
AAS97477.1	3006	polysaccharide biosynthesis protein/methyltransferase, putative	13.393	7	2	5	2	453	49.3	5.31	5.25	2	0	1.26	1.272	1.012	0.914157	0.987534	0.999667	30.07	72.49	54.31	468907	553010	434334	38.86	8.79	10.84	High	Peak Found	Peak Found	High	Peak Found	Not Found	High	High	Peak Found
AAS96353.1	1877	polysaccharide deacetylase family protein	8.514	14	3	4	3	366	41.3	6.96	2.02	3	0	3.446	3.788	1.028	0.0591505	0.342718	0.999667	90.66	105.41	49.64	209259	267909	203086	3.16	33.87	44.14	Peak Found	High	Not Found	Peak Found	High	Not Found	High	Peak Found	High
AAS95336.1	856	porphobilinogen synthase	64.905	46	11	50	11	330	36.4	5.49	68.85	11	0	1.365	1.105	1.22	0.433221	0.993965	0.985375	59.2	34.82	69.43	4.84678e+06	6.08453e+06	6.36424e+06	8.48	14.62	11.43	High	High	High	High	High	High	High	High	High
AAS97804.1	3336	potassium channel histidine kinase domain protein/universal stress protein	18.118	13	4	12	4	379	41.9	6.55	5.19	4	0	0.895	0.619	0.922	0.942916	0.819244	0.992361	29.3	39.61	89.93	670837	471514	383989	4.75	12.36	24.44	High	High	Peak Found	High	Peak Found	Peak Found	High	High	High
AAS94895.1	412	potassium uptake protein TrkA, putative	37.976	36	6	50	6	221	24.2	6.8	50.8	6	0	0.928	0.804	1.014	0.951929	0.914747	0.984176	39.74	50.85	49.17	5.95945e+06	4.20934e+06	4.29227e+06	21.71	18.61	16.97	High	High	High	High	High	High	High	High	High
AAS94896.1	413	potassium uptake protein, TrkH family	19.83	6	2	15	2	445	47.4	8.32	8.73	2	0	0.941	1.638	1.741	0.96948	0.854882	0.798317	36.99	49.29	22.41	444333	418185	1.0228e+06	45.92	19.26	12.97	High	High	High	High	High	Not Found	High	High	High
AAS95127.1	646	precorrin-2 C20-methyltransferase	31.183	36	7	19	7	256	27.5	5.6	29.11	7	0	0.422	0.762	1.476	0.00964055	0.914747	0.890566	51.48	63.12	47.14	2.69123e+06	1.57746e+06	1.64622e+06	19.84	98.05	22.62	High	High	High	High	Peak Found	Peak Found	High	High	High
AAS97221.1	2749	precorrin-6Y C5,15-methyltransferase (decarboxylating)	20.422	14	4	15	4	486	49.9	5.49	12.9	4	0	0.924	0.618	0.934	0.959112	0.838994	0.997848	46.79	58.66	40.52	878800	637150	592191	6.61	9.87	18.84	Peak Found	High	Peak Found	Peak Found	High	Not Found	High	High	High
AAS94944.1	461	predicted 3-dehydroquinate synthase	157.897	79	22	195	22	323	34.5	5.26	276.26	22	0	0.823	1.336	1.611	0.791465	0.950679	0.850842	67.36	64.78	64.42	3.84123e+07	2.73495e+07	3.77208e+07	17.62	4.24	27.15	High	High	High	High	High	High	High	High	High
AAS94943.1	460	predicted phospho-2-dehydro-3-deoxyheptonate aldolase	160.013	73	12	301	12	266	28.4	6.52	605.85	12	0	0.729	1.256	1.608	0.46904	0.966741	0.850842	67.3	76.6	79.35	7.64513e+07	7.75456e+07	7.79962e+07	21.31	24.86	36.63	High	High	High	High	High	High	High	High	High
AAS94947.1	464	prephenate dehydrogenase	25.625	21	5	33	5	255	27.7	6.07	47.01	5	0	0.876	0.773	0.806	0.889335	0.901395	0.881425	58.61	55.27	37.51	4.39421e+06	4.44084e+06	4.10756e+06	8.08	4.34	22.07	High	High	High	High	High	High	High	High	High
AAS95305.1	825	preprotein translocase, SecA subunit	143.453	31	24	174	24	833	93.8	6.38	227.5	24	0	0.914	0.884	0.895	0.952046	0.956732	0.953073	49.86	49.37	51.48	2.11502e+07	1.86992e+07	1.95855e+07	8.49	5.89	18.74	High	High	High	High	High	High	High	High	High
AAS97394.1	2922	preprotein translocase, SecE subunit	33.715	42	4	27	4	83	9.2	7.25	48.8	4	0	0.937	1.303	1.645	0.953718	0.956732	0.837839	49.44	39.43	46.95	2.65545e+06	2.59635e+06	3.95981e+06	11.01	13.97	10.7	High	High	Peak Found	High	Peak Found	Peak Found	High	High	High
AAS96153.1	1676	preprotein translocase, SecG subunit	49.279	34	5	51	5	116	11.9	5.78	76.28	5	0	0.62	1.079	1.107	0.11571	0.999459	0.999667	58.59	69.59	76.17	1.05649e+07	1.03484e+07	8.80966e+06	22.34	27.17	12.44	High	High	High	High	High	High	High	High	High
AAS95801.1	1323	preprotein translocase, SecY subunit	10.284	8	3	14	3	437	47.4	9.85	5.73	3	0	0.563	1.532	2.056	0.280136	0.887067	0.654718	67.82	71.78	81.13	1.64776e+06	1.09304e+06	1.63937e+06	22.33	29.13	17.74	High	High	High	High	Peak Found	Peak Found	High	High	High
AAS96297.1	1820	preprotein translocase, YajC subunit	65.894	43	6	152	6	121	12.8	9.41	333.86	6	0	0.721	0.967	1.157	0.432775	0.992001	0.997949	77.6	100.13	57.24	6.11421e+07	5.98744e+07	7.07408e+07	33.49	22.31	0.95	High	High	High	High	High	High	High	High	High
AAS94776.1	293	prokaryotic dksA/traR C4-type zinc finger family protein	5.931	26	2	5	2	113	12.6	5.03	2.53	2	0	0.282	1.711	10.752	0.0249891	0.907837	0.00643796	137.53	80.91	79.83	312817	209226	340366	29.61	35.39	61.04	Peak Found	Peak Found	High	High	Peak Found	Not Found	High	High	High
AAS97787.1	3319	proline dehydrogenase/delta-1-pyrroline-5-carboxylate dehydrogenase	365.675	58	51	568	51	1006	111.9	6.23	856.02	51	0	0.948	1.114	1.216	0.976581	0.993965	0.985375	64.51	59.18	62.25	1.17224e+08	1.25407e+08	1.32678e+08	8.71	12.32	15.71	High	High	High	High	High	High	High	High	High
AAS94499.1	15	prolipoprotein diacylglyceryl transferase	12.536	12	3	10	3	263	29.4	9.29	7.41	3	0	0.567	1.155	2.014	0.501978	0.993965	0.737328	30.83	32.5	56.08	581506	351898	641918	15.17	34.39	20.06	High	High	Peak Found	High	High	Peak Found	High	High	High
AAS95823.1	1345	prolyl-tRNA synthetase	102.387	31	17	112	17	574	63	5.35	158.29	17	0	0.843	1.345	1.379	0.837272	0.94918	0.950814	67.27	60.51	83.25	8.08855e+06	9.95064e+06	1.09046e+07	12.89	46.24	17.52	High	High	High	High	High	High	High	High	High
AAS96296.1	1819	protein-export membrane protein SecD	123.62	42	19	186	19	532	57.1	7.59	264.51	19	0	0.757	0.994	1.206	0.575863	0.993965	0.990241	57.23	50.41	69.78	2.84875e+07	2.14247e+07	3.03741e+07	6.78	11.66	6.61	High	High	High	High	High	High	High	High	High
AAS96295.1	1818	protein-export membrane protein SecF	67.153	29	11	78	11	362	39.3	5.55	137.22	11	0	0.839	1.095	1.604	0.832815	0.993965	0.854724	49.27	51.26	68.9	4.37164e+07	2.18122e+07	6.00821e+07	48.75	20.85	18.3	High	High	High	High	High	High	High	High	High
AAS96074.1	1596	protein-glutamate methylesterase CheB	17.303	13	4	23	4	357	38.2	7.53	36.7	4	0	0.873	0.602	0.678	0.887095	0.674147	0.763948	62.41	39.67	88.29	3.70246e+06	2.84504e+06	3.86386e+06	12.64	54.62	23.57	High	High	High	High	High	High	High	High	High
AAS96551.1	2078	protein-glutamate methylesterase CheB	46.685	31	9	59	9	367	39	8.35	92.36	9	0	0.876	1.325	1.49	0.912303	0.953611	0.905221	69.12	88.01	57.57	9.16866e+06	9.26296e+06	1.39787e+07	20.82	20.65	24.26	High	High	High	High	High	High	High	High	High
AAS96703.1	2230	purine nucleoside phosphorylase	21.273	25	6	29	6	274	28.7	6.62	8.25	6	0	0.915	0.747	0.801	0.942506	0.870876	0.912564	56.95	58.65	53.04	3.75991e+06	2.90457e+06	2.06405e+06	15.88	34.29	30.49	High	High	High	High	High	High	High	High	High
AAS97682.1	3212	pyridine nucleotide-disulfide oxidoreductase	227.711	49	27	361	27	569	61.1	5.25	666.35	27	0	0.998	0.546	0.552	0.971674	0.469317	0.531474	50.06	76.55	65.14	7.46706e+07	7.32927e+07	4.82139e+07	4.24	18.55	32.51	High	High	High	High	High	High	High	High	High
AAS96091.1	1613	pyridine nucleotide-disulfide oxidoreductase	27.079	21	5	29	5	352	38.1	6.6	22.7	5	0	1.032	2.567	1.91	0.970344	0.272372	0.717654	38.52	68.49	65.03	2.68499e+06	3.56333e+06	4.17505e+06	33.63	20.97	19.41	High	High	High	High	High	High	High	High	High
AAS96249.1	1772	pyridine nucleotide-disulfide oxidoreductase	66.112	29	14	73	14	673	73.5	6.49	91.46	14	0	0.997	0.759	0.684	0.984723	0.891384	0.762056	53.84	49.97	49.17	4.87978e+06	6.86858e+06	4.0531e+06	10.56	8.53	12.14	High	High	High	High	High	High	High	High	High
AAS95643.1	1165	pyridine nucleotide-disulfide oxidoreductase	70.334	30	10	58	10	439	48	8.32	57.35	10	0	0.704	0.974	1.587	0.414161	0.993965	0.875192	59.44	65.96	77.62	7.28253e+06	4.7788e+06	3.51704e+06	36.07	46.26	20.27	High	High	High	High	High	High	High	High	High
AAS97761.1	3292	pyridine nucleotide-disulfide oxidoreductase	25.491	11	6	22	6	776	83.1	5.53	8.28	6	0	1.285	1.055	0.819	0.851801	0.993965	0.969065	33.28	24.25	14.74	726160	840009	731343	10	9.06	4.22	High	High	Peak Found	High	Peak Found	Not Found	High	High	High
AAS95249.1	769	pyridoxal kinase, putative	10.15	10	3	6	3	292	32.4	5.94	0	3	0	0.795	0.837	0.812	0.883116	0.964364	0.972291	44.14	63.05	6.64	690941	235603	567235	20.45	20.58	5.56	High	High	High	High	Peak Found	Not Found	High	High	Peak Found
AAS96384.1	1908	pyridoxal phosphate biosynthetic protein PdxJ	45.999	28	5	58	5	241	26.4	6.52	127.46	5	0	0.952	1.034	0.949	0.985566	0.993965	0.976855	42.69	40.37	53.45	1.12928e+07	9.92256e+06	1.0064e+07	17.21	6.98	22.93	High	High	High	High	High	High	High	High	High
AAS95862.1	1384	pyrimidine operon regulatory protein	37.875	52	7	37	7	178	19.7	5.82	57.05	7	0	1.417	0.841	0.948	0.592095	0.956732	0.984176	69.67	56.89	124.87	1.77604e+06	2.24011e+06	2.16638e+06	32.87	22.87	24.29	High	High	High	High	High	Not Found	High	High	High
AAS96805.1	2332	pyrroline-5-carboxylate reductase	48.47	42	9	34	9	265	27.4	5.68	23.47	9	0	0.81	1.124	1.262	0.766435	0.993965	0.983724	47.03	89.12	88.45	3.1046e+06	3.91873e+06	3.6605e+06	57.39	32.01	21.96	High	High	High	High	High	High	High	High	High
AAS96310.1	1834	pyruvate carboxylase, putative	465.53	49	52	688	52	1234	137.3	6.49	1012.87	52	0	1	1.091	1.05	0.96948	0.994465	0.997949	55.41	50.33	55.59	9.74699e+07	1.07728e+08	1.0258e+08	12.63	53.33	20.78	High	High	High	High	High	Peak Found	High	High	High
AAS96047.1	1569	pyruvate ferredoxin oxidoreductase, alpha subunit	67.604	31	12	64	12	578	61.8	5.76	114.57	12	0	1.155	2.093	1.566	0.800907	0.537343	0.875192	47.17	71.14	73.78	5.92833e+06	6.80498e+06	9.71048e+06	19.49	66.35	25.24	Peak Found	High	High	High	High	High	Peak Found	High	Peak Found
AAS96421.1	1945	pyruvate ferredoxin oxidoreductase, alpha subunit, putative	63.04	31	9	68	9	382	42	6.8	96.82	9	0	0.86	0.82	0.841	0.882495	0.918287	0.91123	68.04	47.13	72.44	6.39853e+06	6.42364e+06	4.51467e+06	13.01	18.38	4.18	High	High	High	High	High	High	High	High	High
AAS96048.1	1570	pyruvate ferredoxin oxidoreductase, beta subunit	64.469	53	11	101	11	284	30.8	8.22	53.85	11	0	0.955	0.855	0.881	0.988116	0.938238	0.949735	51.75	64.5	70.6	1.3105e+07	1.39757e+07	1.52776e+07	7.89	24.83	17.3	High	High	High	High	High	High	High	High	High
AAS96422.1	1946	pyruvate ferredoxin oxidoreductase, beta subunit, putative	11.946	14	4	15	4	276	30.1	9.06	15.68	4	0	0.521	0.551	1.213	0.0967365	0.62874	0.976855	60.57	34.58	51.11	2.52339e+06	1.62465e+06	1.5138e+06	18.84	9.48	5.57	High	High	High	High	High	Peak Found	High	High	High
AAS96423.1	1947	pyruvate ferredoxin oxidoreductase, gamma subunit, putative	35.419	43	7	49	7	207	22.4	8.57	51.71	7	0	0.878	0.691	0.721	0.914157	0.783663	0.812714	51	53.88	61.62	9.67456e+06	8.76415e+06	1.2337e+07	8.12	8.67	7.22	High	High	High	High	High	High	High	High	High
AAS97816.1	3347	pyruvate ferredoxin/flavodoxin oxidoreductase family protein	99.209	52	7	75	7	182	19.1	5.8	160.88	7	0	1.391	2.467	1.895	0.259327	0.285357	0.72541	51.99	95.51	54.13	6.821e+06	8.76729e+06	1.89075e+07	8.32	16.09	6.85	High	High	Peak Found	High	High	Peak Found	High	High	High
AAS97817.1	3348	pyruvate ferredoxin/flavodoxin oxidoreductase, beta subunit, putative	36.05	27	6	52	6	260	28.1	6.52	68.26	6	0	1.07	1.658	1.488	0.942916	0.796391	0.910685	55.92	55.57	90.88	2.46089e+06	3.75962e+06	4.6188e+06	30.25	52.18	4.32	High	High	High	High	High	High	High	High	High
AAS97818.1	3349	pyruvate flavodoxin/ferredoxin oxidoreductase, thiamine diP-binding domain protein	98.55	35	9	106	9	357	38.4	5.77	223.49	9	0	1.047	2.609	3.23	0.929563	0.223376	0.139731	92.78	61.98	91.18	7.09137e+06	2.03841e+07	2.11366e+07	21.79	47.39	36.48	High	High	High	High	High	High	High	High	High
AAS96986.1	2514	pyruvate kinase	172.539	51	20	299	20	469	50.4	5.85	542.92	20	0	0.986	0.797	0.779	0.971674	0.90225	0.870807	64.89	54.25	71.4	7.95548e+07	9.86008e+07	5.99468e+07	19.72	4.76	23.39	High	High	High	High	High	High	High	High	High
AAS97211.1	2739	pyruvate phosphate dikinase, PEP/pyruvate binding domain protein	64.574	25	17	58	17	1028	111	5.74	26.96	17	0	0.802	0.554	0.736	0.739215	0.56252	0.833374	50.42	65.35	101.03	5.31123e+06	4.00616e+06	2.57078e+06	21.3	14.94	10.35	High	High	High	High	High	High	High	High	High
AAS94730.1	246	pyruvate phosphate dikinase, PEP/pyruvate binding domain protein	46.458	18	10	35	10	744	79.1	6	22.68	10	0	1.016	0.705	0.73	0.98209	0.834042	0.850842	39.68	42.36	69.81	2.90461e+06	2.72786e+06	2.26987e+06	15.13	10.99	32.6	High	High	High	High	High	High	High	High	High
AAS97496.1	3025	pyruvate-ferredoxin oxidoreductase	625.116	49	58	1446	58	1215	131.4	5.66	2289.29	58	0	1.244	1.09	0.869	0.553998	0.996067	0.943933	57.78	64.49	72.81	4.39185e+08	5.39405e+08	4.46503e+08	6.16	3.64	21.33	High	High	High	High	High	High	High	High	High
AAS95206.1	726	queuine tRNA-ribosyltransferase	19.14	15	5	21	5	375	41.2	7.49	24.87	5	0	1.133	1.315	1.088	0.908926	0.956732	0.999667	41.72	52.23	34.95	1.94416e+06	3.01473e+06	3.44423e+06	19.29	6.04	12.94	High	High	High	High	High	High	High	High	High
AAS96285.1	1808	quinolinate synthetase complex, subunit A	29.13	19	5	16	5	358	38.4	6.68	20.72	5	0	1.4	1.96	1.612	0.708029	0.65788	0.832722	78.24	82.94	69.96	1.17661e+06	822448	2.65149e+06	5.25	11	28.96	High	High	Peak Found	High	Peak Found	Peak Found	High	High	High
AAS97226.1	2754	quinone oxidoreductase	8.351	8	2	7	2	325	34.5	7.03	3.42	2	0	0.901	0.876	1.255	0.942506	0.96737	0.968173	66.85	56.84	68.93	1.6918e+06	1.02161e+06	1.44809e+06	17.83	44.21	47.72	High	High	High	High	High	Peak Found	High	Peak Found	High
AAS95558.1	1078	R3H domain protein	150.408	54	22	185	22	430	46	9.01	237.45	22	0	0.832	1.086	1.277	0.8196	0.996604	0.980209	67.21	53.8	63.64	2.7607e+07	2.36641e+07	2.86316e+07	5.82	47.6	5.46	High	High	High	High	High	High	High	High	High
AAS96244.1	1767	radical SAM domain protein	6.987	12	2	5	2	322	35	7.09	0	2	0	0.833	0.121	0.144	0.896373	0.00499774	0.035188	101.79	59.88	107.03	588769	398721	57484.7	49.04	80.61	19.11	Not Found	High	High	Peak Found	Not Found	High	High	Not Found	Peak Found
AAS97229.1	2757	radical SAM domain protein	15.573	12	3	18	3	375	41.3	6.28	11.04	3	0	0.783	2.22	3.283	0.844655	0.617488	0.225206	50.99	29.99	55.1	625453	406620	1.46699e+06	6.6	37.56	26.79	High	High	High	High	High	Peak Found	High	High	High
AAS97228.1	2756	radical SAM domain protein	48.376	29	8	23	8	372	41.3	6.86	34.82	8	0	1.484	4.511	2.809	0.623627	0.0204624	0.279104	107.73	41.96	49.54	942543	1.05105e+06	4.3543e+06	27.13	17.07	22.58	High	Peak Found	High	Peak Found	High	Peak Found	High	High	High
AAS94380.1	A0075	radical SAM domain protein	52.285	25	13	60	13	468	53.6	5.91	43.54	13	0	0.92	1.766	1.837	0.944842	0.729877	0.744593	63.23	49.26	63.97	4.51247e+06	5.53217e+06	8.24883e+06	29.12	34.7	23.18	High	High	High	High	High	High	High	High	High
AAS95910.1	1432	radical SAM domain protein	51.25	16	12	39	12	864	97.3	6.33	35.45	12	0	0.668	1.23	1.536	0.393301	0.971272	0.877919	61.1	77.6	90.88	3.29968e+06	1.51583e+06	3.33017e+06	78.52	31.49	26.24	High	High	High	High	High	High	High	High	High
AAS97474.1	3003	radical SAM domain protein	33.158	21	7	23	7	370	41.9	6.47	23.69	7	0	1.332	1.617	1.432	0.756999	0.830619	0.921499	73.91	45.96	65.62	1.20799e+06	1.9022e+06	2.51585e+06	24.28	11.39	5.81	High	High	High	High	High	High	High	High	High
AAS97489.1	3018	radical SAM domain protein	32.166	19	6	19	6	377	42.8	8.44	30.74	6	0	0.935	0.84	0.82	0.95452	0.956732	0.930043	56.5	89.38	114.72	2.55528e+06	3.38577e+06	1.36387e+06	48.16	37.72	6.87	High	High	High	High	High	High	High	High	High
AAS95337.1	857	radical SAM domain protein	121.136	55	18	148	18	393	44.5	6.89	225.66	18	0	0.998	1.304	1.004	0.971674	0.957945	0.985375	54.92	50.22	52.67	2.14666e+07	2.60274e+07	2.44697e+07	12.7	21.4	15.22	High	High	High	High	High	High	High	High	High
AAS94363.1	A0097	radical SAM domain protein	21.985	20	6	15	6	499	54	5.95	8.18	6	0	1.164	1.352	1.074	0.925408	0.956862	0.997949	34.09	48.77	50.32	969000	1.04196e+06	1.15706e+06	10.3	11.96	13.65	High	High	High	High	High	High	Peak Found	High	High
AAS94666.1	182	radical SAM domain protein	71.741	44	13	66	13	307	35.5	9.2	83.45	13	0	0.972	1.03	1.081	0.996749	0.993965	0.998377	57.83	43.09	46.47	5.8406e+06	6.29335e+06	6.33409e+06	12.74	91.07	4.9	High	High	High	High	High	High	High	High	High
AAS97376.1	2904	radical SAM enzyme, Cfr family	24.891	18	4	15	4	364	40.4	7.36	25.22	4	0	1.679	0.856	0.553	0.307563	0.964364	0.717534	46.15	29.24	42.22	1.41912e+06	2.08741e+06	1.30048e+06	5.41	34.26	21.04	High	High	High	High	High	High	High	High	Peak Found
AAS97490.1	3019	radical SAM/B12 binding domain protein	35.832	18	7	31	7	485	54	6.7	28.94	7	0	1.194	0.809	0.572	0.800907	0.937226	0.645179	53.87	67.13	70.94	2.76666e+06	3.2139e+06	1.76772e+06	14.31	14.44	21.17	High	High	High	High	High	High	High	High	High
AAS95570.1	1090	recA protein	120.879	53	18	153	18	357	38.4	5.78	266.06	18	0	1.026	0.889	0.771	0.944842	0.95785	0.86483	48.6	44.34	46.71	2.79706e+07	3.06422e+07	2.44521e+07	13.27	4.65	7.31	High	High	High	High	High	High	High	High	High
AAS95767.1	1289	reductase, iron-sulfur binding subunit, putative	145.986	29	13	283	13	536	60.7	6.11	382.06	13	0	0.941	0.783	0.876	0.971674	0.895298	0.94836	72.12	89.41	75.59	6.95687e+07	6.72266e+07	4.34632e+07	14.6	27.76	25.26	High	High	High	High	High	High	High	High	High
AAS95765.1	1287	reductase, iron-sulfur binding subunit, putative	120.723	61	15	228	15	261	29	8.34	377.44	15	0	0.842	0.779	0.987	0.832815	0.88822	0.984176	52.64	74.9	61.55	3.95175e+07	2.81793e+07	3.1546e+07	27.79	14.8	17.6	High	High	High	High	High	High	High	High	High
AAS95764.1	1286	reductase, transmembrane subunit, putative	13.301	5	2	29	2	387	43.5	8.84	54.69	2	0	0.996	0.8	0.832	0.988116	0.907707	0.901583	92.56	49.38	74.55	5.74503e+06	5.71215e+06	4.59317e+06	12.65	33.33	13.6	High	High	High	High	High	High	High	High	High
AAS95439.1	959	replicative DNA helicase	85.108	26	10	62	10	493	54.8	5.77	66.97	10	0	1.637	1.164	0.748	0.0343892	0.993965	0.835836	50.42	37.93	55.23	4.98275e+06	1.25197e+07	4.57541e+06	17.91	7.74	15.3	High	High	High	High	High	High	High	High	High
AAS94622.1	138	response regulator	40.399	58	6	31	6	126	14.1	4.96	41.77	6	0	1.2	3.183	9.289	0.857922	0.0963171	7.74861e-05	127.34	81.82	67.72	2.77872e+06	1.21497e+06	9.35193e+06	86.49	58.37	15.42	High	High	High	High	High	High	High	High	High
AAS97242.1	2770	response regulator	10.779	26	3	5	3	132	14.8	4.81	2.48	3	0	0.244	0.549	3.961	0.00128024	0.722096	0.179964	148.4	36.55	46.24	630301	380203	574993	39.18	3.19	78.61	Peak Found	Peak Found	High	Peak Found	High	Peak Found	Peak Found	High	High
AAS97050.1	2578	response regulator	16.686	19	3	14	3	229	24.7	5	13.23	3	0	1.092	0.729	0.545	0.954036	0.921572	0.737184	31.33	85.86	20.83	1.1485e+06	1.03563e+06	570573	22.49	26.14	11.03	High	High	Peak Found	High	High	Not Found	High	High	High
AAS95368.1	888	response regulator	41.29	21	9	35	9	570	63	5.97	17.48	9	0	0.855	0.689	0.717	0.866809	0.793085	0.821751	79.03	68.78	67.03	1.25936e+07	3.32699e+06	3.06412e+06	3.12	22.91	133.52	High	High	High	High	High	High	High	High	High
AAS94754.1	271	response regulator	28.165	23	7	22	7	496	51.6	5.3	15.34	7	0	1.098	0.788	0.646	0.936868	0.924507	0.825722	58.54	80.02	67.53	2.94527e+06	2.01201e+06	1.54615e+06	73.63	14.74	105.73	High	High	High	Peak Found	High	High	High	High	High
AAS95202.1	722	response regulator	144.804	45	22	135	22	518	57.8	5.52	210.24	22	0	0.766	0.692	0.807	0.611471	0.784501	0.896116	49.76	61.47	51.45	1.79139e+07	1.43187e+07	1.07736e+07	24.79	9.62	10.21	High	High	High	High	High	High	High	High	High
AAS97437.1	2966	response regulator	11.463	23	2	14	2	151	17	5.02	14.95	2	0	6.048	7.59	1.414	2.23871e-16	5.54668e-05	0.943933	85.96	89.21	31.11	976034	1.33358e+07	2.08964e+07	41.37	10.39	7.13	High	High	High	High	High	High	High	High	High
AAS95905.1	1427	response regulator	12.351	15	3	5	3	137	15.3	4.73	4.54	3	0	2.092	2.032	1.311	0.210187	0.717955	0.964272	40.14	106.18	94.89	940383	485031	399531	8.67	33.19	16.06	Peak Found	Peak Found	High	High	Not Found	Peak Found	Not Found	High	High
AAS97052.1	2580	response regulator	99.087	18	19	64	19	1373	144.1	5.06	85.31	19	0	1.043	1.257	1.314	0.934211	0.966741	0.972027	68.96	66.42	83.75	5.7297e+06	1.02708e+07	5.91212e+06	35.81	33.25	20.21	High	High	High	High	High	High	High	High	High
AAS94813.1	330	response regulator	60.973	36	14	31	14	412	44.5	6.61	30.03	14	0	0.949	1.033	1.128	0.971674	0.993965	0.999667	103.44	67.69	67.67	7.45565e+06	7.09635e+06	5.15108e+06	24.01	18.91	16.35	High	High	High	High	High	High	High	High	High
AAS95062.1	581	response regulator/anti-anti-sigma factor	18.149	27	5	11	5	233	25.2	5.03	4.49	5	0	1.019	0.789	0.572	0.984949	0.93275	0.737184	70.59	91.54	85.21	2.14146e+06	1.81993e+06	1.65582e+06	46.86	38.63	22.61	Peak Found	High	High	Peak Found	High	High	Peak Found	High	High
AAS95117.1	636	response regulator/GGDEF domain protein	17.258	11	4	13	4	437	48.1	5.86	7.48	4	0	0.76	0.74	1.097	0.802977	0.930904	0.997848	75.41	71.24	95.04	1.02416e+06	638367	695188	31.75	47.05	34.04	High	High	High	High	Peak Found	Peak Found	High	High	High
AAS94891.1	408	response regulator/sensory box/GGDEF domain/EAL domain protein	43.984	19	12	41	12	715	79	5.14	36.19	12	0	0.668	1.079	1.581	0.331097	0.993965	0.864178	54.05	64.64	84.09	3.4273e+06	2.16935e+06	3.03606e+06	24.36	8.43	2.38	High	High	High	High	High	High	High	High	High
AAS97405.1	2933	response regulator/sensory box/HDIG domain protein	31.034	17	6	17	6	458	50	5.97	12.46	6	0	0.693	1.114	1.635	0.750331	0.993965	0.836097	81.87	73.07	83.71	486238	421850	931568	46.52	21.36	9.43	High	High	High	High	High	Not Found	High	High	High
AAS97508.1	3037	rhodanese-like domain protein	49.623	28	7	53	7	290	31.9	5.05	72.13	7	0	1.102	0.426	0.374	0.841569	0.220094	0.131869	43.02	50.51	53.55	8.89451e+06	8.39927e+06	5.42258e+06	22.76	57.14	11.35	High	High	High	High	High	High	High	High	High
AAS96449.1	1973	rhodanese-like domain protein	26.277	22	4	28	4	282	30.7	4.96	18.51	4	0	1.407	0.748	0.587	0.539852	0.901395	0.72541	30.32	43.68	50.17	2.24507e+06	2.51233e+06	1.87218e+06	8.54	16.22	30.84	High	High	High	High	High	High	High	High	High
AAS95846.1	1368	rhodanese-like domain protein	146.304	44	21	163	21	540	57.1	5.36	249.47	21	0	1.16	1.422	1.062	0.735742	0.915515	0.997949	64.04	58.47	51.22	2.47679e+07	4.06678e+07	2.87471e+07	15.4	8.2	12.98	High	High	High	High	High	High	High	High	High
AAS97224.1	2752	rhodanese-like domain protein	74.412	50	11	161	11	173	19.4	8.21	220.42	11	0	0.823	1.108	1.135	0.791465	0.993965	0.998377	58.97	51.58	49.26	4.81027e+07	4.54e+07	5.30692e+07	18.69	5.7	6.86	High	High	High	High	High	High	High	High	High
AAS95679.1	1201	riboflavin biosynthesis protein RibD	24.896	25	5	25	5	377	40.2	6.89	8.68	5	0	1.078	0.692	0.565	0.953718	0.870104	0.730157	29.44	34.36	21.28	1.99027e+06	1.9292e+06	1.21146e+06	2.69	18.26	18.15	High	High	High	High	High	High	High	High	High
AAS94933.1	450	riboflavin biosynthesis protein RibF	28.888	26	6	24	6	314	35	6.7	37.15	6	0	0.789	1.052	1.143	0.784406	0.996604	0.997848	74.56	54.55	66.85	1.72658e+06	2.03777e+06	1.83708e+06	15.63	20.45	27.72	High	High	High	High	High	High	High	High	High
AAS95678.1	1200	riboflavin synthase, alpha subunit	17.584	21	5	13	5	220	23.6	5.87	13.47	5	0	1.207	1.321	1.021	0.879869	0.956732	0.999667	53.82	39.29	57.97	1.07522e+06	1.30954e+06	1.32104e+06	25.25	8.18	15.18	High	High	Peak Found	Peak Found	High	High	High	High	High
AAS95676.1	1198	riboflavin synthase, beta subunit	91.998	81	11	182	11	156	16.6	6.92	389.95	11	0	1.137	1.192	0.977	0.783618	0.993965	0.98323	65.59	56.12	80.87	4.6563e+07	5.62282e+07	4.6497e+07	5.52	13.58	9.36	High	High	High	High	High	High	High	High	High
AAS96939.1	2467	ribonuclease R	166.668	34	28	166	28	886	98.1	9.29	253.86	28	0	0.862	0.908	1.032	0.875868	0.964364	0.997848	61.81	48.78	48.92	2.42558e+07	2.00722e+07	1.76408e+07	13.88	24.7	6.29	High	High	High	High	High	High	High	High	High
AAS97526.1	3055	ribonuclease, Rne/Rng family	118.703	47	20	143	19	489	55.6	9.17	192.66	20	0	0.859	1.08	1.179	0.870738	0.999187	0.997848	36.27	36.87	61.6	1.63473e+07	1.39784e+07	1.63786e+07	52.04	4.05	2.6	High	High	High	High	High	High	High	High	High
AAS97848.1	3379	ribonucleoside-diphosphate reductase	179.503	37	27	194	27	777	85.2	6.47	283.19	27	0	0.998	1.245	1.256	0.971674	0.968524	0.98323	51.33	65.61	73.63	1.82213e+07	1.72261e+07	2.30867e+07	11.83	7.54	25.77	High	High	High	High	High	High	High	High	High
AAS96058.1	1580	ribose 5-phosphate isomerase, putative	26.754	56	6	21	6	147	15.9	6.77	29.55	6	0	1.573	3.553	1.361	0.265245	0.0563949	0.968173	54.74	34.93	70.14	2.46205e+06	2.9114e+06	6.57725e+06	20.23	27.99	21	High	High	High	High	High	High	High	High	High
AAS96053.1	1575	ribose-phosphate pyrophosphokinase	102.788	46	12	117	12	312	33.4	6.86	188.26	12	0	1.262	0.959	0.783	0.51161	0.992001	0.875192	50.35	54.13	57.54	1.73095e+07	2.12954e+07	1.64144e+07	9.56	10.15	28.36	High	High	High	High	High	High	High	High	High
AAS96146.1	1669	ribosomal large subunit pseudouridine synthase B	27.046	24	5	16	5	292	32.5	9.55	12.75	5	0	1.573	1.603	0.974	0.463794	0.846138	0.997848	47.56	95.23	59.23	1.31481e+06	1.98116e+06	2.13999e+06	58.08	10.2	16.08	High	Peak Found	Peak Found	High	High	High	High	High	High
AAS97661.1	3191	ribosomal large subunit pseudouridine synthase C	12.483	7	2	5	2	390	42.4	8.6	4.31	2	0	1.299	2.553	1.781	0.914489	0.674429	0.864178	20.89	119.1	115.13	147744	193317	264330	13.88	20.53	37.88	Peak Found	High	Peak Found	High	Peak Found	Not Found	High	High	High
AAS97397.1	2925	ribosomal protein L1	114.699	71	19	205	19	235	24.8	9.22	337.3	19	0	1.001	0.855	0.797	0.96948	0.938238	0.890566	42.51	44.68	60.91	7.96271e+07	6.94272e+07	6.25685e+07	10.9	19.49	16.18	High	High	High	High	High	High	High	High	High
AAS97398.1	2926	ribosomal protein L10	85.355	58	11	196	11	173	18.7	9.38	395.1	11	0	1.254	0.985	0.849	0.53091	0.993965	0.925947	53.77	54.7	54.16	5.29683e+07	6.97654e+07	5.41179e+07	10.27	9.19	11.25	High	High	High	High	High	High	High	High	High
AAS97396.1	2924	ribosomal protein L11	38.015	34	5	81	5	140	14.9	9.74	99.98	5	0	1.048	0.631	0.563	0.929563	0.674147	0.55705	42.33	36.75	37.78	2.22562e+07	2.15904e+07	1.10189e+07	8.71	16.04	20.86	High	High	High	High	High	High	High	High	High
AAS96990.1	2518	ribosomal protein L13	43.495	31	5	81	5	144	16.4	9.79	134.12	5	0	1.049	0.609	0.61	0.927	0.630332	0.664969	66.66	63.86	57.76	2.17521e+07	1.85877e+07	1.19591e+07	29.68	20.86	4.61	High	High	High	High	High	High	High	High	High
AAS95791.1	1313	ribosomal protein L14	76.631	63	10	98	10	122	13.3	9.94	168.74	10	0	0.827	0.586	0.698	0.800907	0.570908	0.782933	71.26	74.53	72.97	2.87644e+07	2.71354e+07	1.75326e+07	1.75	36.57	9.88	High	High	High	High	High	High	High	High	High
AAS95800.1	1322	ribosomal protein L15	75.365	61	9	146	9	148	15.8	9.89	299.51	9	0	1.21	0.439	0.366	0.623627	0.215004	0.119341	52.08	58.17	55.98	4.91592e+07	6.34719e+07	2.61254e+07	23.67	20.1	23.97	High	High	High	High	High	High	High	High	High
AAS95788.1	1310	ribosomal protein L16	39.264	47	6	108	6	137	15	11.24	181.33	6	0	0.898	0.442	0.462	0.938474	0.219806	0.31726	47.49	39.7	41.87	5.98585e+07	5.89802e+07	2.62119e+07	6.21	7.44	20.13	High	High	High	High	High	High	High	High	High
AAS95808.1	1330	ribosomal protein L17	59.572	54	6	117	6	133	14.6	10.93	217.89	6	0	1.088	0.615	0.576	0.866809	0.645116	0.59336	73.48	82.74	93.75	3.14111e+07	3.90946e+07	1.86521e+07	13.26	11.31	27.13	High	High	High	High	High	High	High	High	High
AAS95797.1	1319	ribosomal protein L18	19.778	24	4	29	4	119	13.3	10.23	66.57	4	0	2.087	1.073	0.773	0.00194769	0.996604	0.865574	147.31	75.16	140.35	5.39008e+06	7.72793e+06	7.44231e+06	30.08	42.41	13.67	High	High	High	High	High	Peak Found	High	High	High
AAS95315.1	835	ribosomal protein L19	28.108	39	6	61	6	115	13.5	10.9	96.88	6	0	1.173	0.593	0.428	0.7061	0.587974	0.240463	51.76	87.47	60.81	1.92599e+07	2.8439e+07	9.49495e+06	2.11	60.25	18.25	High	High	High	High	High	High	High	High	High
AAS95784.1	1306	ribosomal protein L2	114.042	55	14	228	14	276	30.1	11.06	442	14	0	0.938	0.502	0.561	0.971674	0.364105	0.5527	71.3	52.99	73.27	7.0393e+07	8.42283e+07	3.54905e+07	17.31	11.38	13.43	High	High	High	High	High	High	High	High	High
AAS97007.1	2535	ribosomal protein L20	14.531	21	4	38	4	117	13.7	11.02	56.34	4	0	1.181	0.732	0.722	0.695852	0.832165	0.812714	14.25	55.1	42.39	1.82151e+07	2.12288e+07	1.34721e+07	10.98	22.57	6.32	High	High	High	High	High	High	High	High	High
AAS95407.1	927	ribosomal protein L21	73.049	62	8	117	8	102	11.3	9.57	234.55	8	0	1.115	0.788	0.62	0.824746	0.897678	0.677894	36.88	68.84	53.22	3.34338e+07	3.84005e+07	2.62295e+07	22.09	14.07	25.09	High	High	High	High	High	High	High	High	High
AAS95786.1	1308	ribosomal protein L22	68.187	66	5	161	5	112	12.5	10.9	227.04	5	0	1.21	0.494	0.351	0.623627	0.346789	0.0977803	68.08	63.94	58.98	3.06911e+07	3.62789e+07	1.44355e+07	22.71	18.01	30.05	High	High	High	High	High	High	High	High	High
AAS95783.1	1305	ribosomal protein L23	36.051	41	6	71	6	112	12.7	10.36	86.01	6	0	1.136	0.36	0.35	0.784406	0.0838548	0.0968192	58.63	33.05	59.75	2.18553e+07	1.92921e+07	8.71554e+06	4.55	28.77	23.43	High	High	High	High	High	High	High	High	High
AAS95792.1	1314	ribosomal protein L24	10.976	35	3	26	3	107	12.3	9.89	35.83	3	0	0.879	0.397	0.346	0.912303	0.257802	0.209585	54.12	78.37	67.73	2.47062e+06	2.36487e+06	1.22987e+06	13.82	24.37	16.68	High	High	High	High	High	High	High	High	High
AAS96052.1	1574	ribosomal protein L25	98.843	61	11	187	11	190	21.5	8.75	323.93	11	0	1.028	1.361	1.406	0.944842	0.938238	0.945273	90.14	79.91	107.01	2.796e+07	3.83075e+07	3.20632e+07	27.4	30.26	22.06	High	High	High	High	High	High	High	High	High
AAS95408.1	928	ribosomal protein L27	4.33	21	2	13	2	87	9.6	11.43	2.43	2	0	1.164	0.404	0.297	0.832815	0.273091	0.062181	35.95	43.6	43.67	2.67203e+06	4.10023e+06	1.20856e+06	34.68	19.54	18.96	High	High	High	High	High	High	High	High	High
AAS95689.1	1211	ribosomal protein L28	17.11	51	4	31	4	69	7.6	10.45	39.83	4	0	1.21	0.348	0.252	0.72736	0.100428	0.0148813	58	99.16	60.09	4.4968e+06	7.07109e+06	2.22606e+06	44.57	25.47	36.58	High	High	High	High	High	High	High	High	High
AAS95789.1	1311	ribosomal protein L29	39.287	72	6	41	6	61	7.1	9.7	68.26	6	0	1.236	1.221	1.799	0.571172	0.986041	0.763948	104.54	49.52	108.59	1.7379e+07	1.07152e+07	2.40028e+07	76.47	30.18	7.36	High	High	High	High	High	High	High	High	High
AAS95781.1	1303	ribosomal protein L3	79.385	54	10	179	10	209	22.3	9.58	288.92	10	0	1.184	1.112	0.764	0.686217	0.993965	0.854724	61.87	71.43	71.5	2.61834e+07	3.38063e+07	3.16322e+07	12.91	13.72	20.57	High	High	High	High	High	High	High	High	High
AAS95799.1	1321	ribosomal protein L30	12.016	46	3	30	3	56	6.2	9.89	52.56	3	0	1.848	0.89	0.434	0.0207714	0.964364	0.240463	63.23	50.7	72.53	4.75856e+06	5.77912e+06	3.806e+06	25.09	51.98	43.52	High	High	High	High	High	High	High	High	High
AAS97384.1	2912	ribosomal protein L31	7.941	34	2	13	2	71	8.1	8.75	9.03	2	0	1.313	1.07	0.69	0.728885	0.993965	0.842188	93.89	58.58	104.85	1.5451e+06	2.41791e+06	1.54858e+06	41.68	32.45	35.48	High	High	High	High	High	Peak Found	High	High	High
AAS95687.1	1209	ribosomal protein L32	24.881	47	2	24	2	59	6.5	9.91	66.87	2	0	0.953	0.698	0.711	0.971674	0.832165	0.806958	34.59	35.29	31.42	4.16047e+06	3.57874e+06	3.00045e+06	16.46	13.75	42.95	High	High	Peak Found	High	High	High	High	High	High
AAS97393.1	2921	ribosomal protein L33	9.328	24	2	9	2	49	5.9	9.94	21.32	2	0	1.437	0.66	0.517	0.572025	0.833416	0.646033	32.17	30.09	48.65	1.63056e+06	2.07646e+06	999171	25.11	32.18	23.37	High	High	High	Peak Found	High	High	High	High	High
AAS97008.1	2536	ribosomal protein L35	21.874	37	3	18	3	65	7.5	12.19	36.53	3	0	1.24	0.541	0.317	0.686217	0.534973	0.0548972	107.2	66.21	59.47	4.20049e+06	6.01935e+06	1.99461e+06	33.99	11.12	51.84	High	High	High	High	High	High	Peak Found	High	High
AAS95782.1	1304	ribosomal protein L4	89.614	50	8	361	8	206	22.6	10.24	547.9	8	0	0.964	0.871	0.65	0.999866	0.951685	0.730157	56.27	53.33	64.46	7.00879e+07	8.69759e+07	5.69493e+07	27.57	23.58	10.9	High	High	High	High	High	High	High	High	High
AAS95793.1	1315	ribosomal protein L5	153.62	77	17	225	17	179	20.2	9.7	357.27	17	0	0.958	0.604	0.601	0.99509	0.623897	0.645179	72.03	64.34	71.9	5.37808e+07	5.51011e+07	3.65781e+07	14.91	15.18	22.78	High	High	High	High	High	High	High	High	High
AAS95796.1	1318	ribosomal protein L6	106.327	72	15	178	15	179	19.1	9.76	377.36	15	0	1.141	0.691	0.556	0.777515	0.78361	0.539772	57.12	68.54	65.2	5.14465e+07	5.62755e+07	2.64152e+07	11.59	18.38	13.05	High	High	High	High	High	High	High	High	High
AAS97399.1	2927	ribosomal protein L7/L12	33.431	35	6	179	6	127	13.3	4.7	258.08	6	0	0.771	1.984	2.311	0.62499	0.568207	0.477748	86.71	63.62	77.1	1.91462e+07	1.19629e+07	2.75129e+07	31.05	22.65	22.01	High	High	High	High	High	Peak Found	High	High	High
AAS95438.1	958	ribosomal protein L9	121.859	88	14	379	14	167	17.9	5.44	473.48	14	0	1.032	1.282	1.154	0.942506	0.964364	0.997949	42.12	44.22	34.67	6.34084e+07	5.88705e+07	7.61967e+07	14.25	14.81	13.48	High	High	High	High	High	High	High	High	High
AAS97620.1	3150	ribosomal protein S1	246.506	45	38	385	38	577	64.7	5.17	670.31	38	0	0.802	0.924	1.106	0.73459	0.966741	0.999667	61.58	65.3	57.23	1.06256e+08	9.94849e+07	1.1098e+08	13.54	6.5	6.22	High	High	High	High	High	High	High	High	High
AAS95947.1	1469	ribosomal protein S1, putative	122.16	40	19	112	19	487	51.7	5.39	177.23	19	0	1.148	0.892	0.749	0.762834	0.959635	0.836097	50.87	70.72	60.9	1.33636e+07	1.74059e+07	1.27288e+07	31.26	16.52	39.84	High	High	High	High	High	High	High	High	High
AAS95780.1	1302	ribosomal protein S10	74.977	66	8	173	8	105	11.7	9.57	225.9	8	0	1.253	1.186	0.88	0.531892	0.993965	0.949735	35.86	59.16	83.91	2.42846e+07	2.82861e+07	2.49463e+07	14.28	40.02	8.74	High	High	High	High	High	High	High	High	High
AAS95805.1	1327	ribosomal protein S11	66.802	55	7	113	7	129	14	11.69	188.82	7	0	0.965	0.67	0.714	0.999866	0.740049	0.803068	80.14	67.87	94.13	5.07269e+07	4.72383e+07	3.0085e+07	18.96	32.08	10.89	High	High	High	High	High	High	High	High	High
AAS95776.1	1298	ribosomal protein S12	31.58	25	6	41	6	123	13.9	11.43	83.09	6	0	0.941	0.496	0.556	0.971674	0.346982	0.540928	47.48	58.9	65.88	1.08792e+07	8.62423e+06	5.38568e+06	1.96	30.25	16.88	High	High	High	High	High	High	High	High	High
AAS95804.1	1326	ribosomal protein S13	77.011	66	9	174	9	122	13.8	10.87	376.13	9	0	0.971	0.781	0.721	0.996128	0.891747	0.812714	51.65	63.81	73.48	5.45068e+07	6.45359e+07	3.83635e+07	21.07	4.97	22.41	High	High	High	High	High	High	High	High	High
AAS94986.1	504	ribosomal protein S15	26.746	37	3	66	3	89	10.2	10.1	82.42	3	0	1.406	1.207	0.704	0.220217	0.992001	0.79497	93.99	56.96	87.57	7.26206e+06	8.61996e+06	1.00011e+07	6.48	25.23	17.68	High	High	High	High	High	High	High	High	High
AAS95319.1	839	ribosomal protein S16	21.555	56	4	35	4	79	9.1	10.07	63.82	4	0	0.272	0.706	1.705	2.77284e-11	0.802676	0.810937	126.43	52.53	109.29	1.65655e+07	2.28756e+07	1.39471e+07	34.63	8.05	9.03	High	High	High	High	High	High	High	High	High
AAS95790.1	1312	ribosomal protein S17	52.617	58	6	77	6	88	10.3	10.24	133.15	6	0	0.721	0.574	1.071	0.43287	0.545703	0.99805	78.21	68.71	99.71	2.54292e+07	1.58517e+07	1.92012e+07	40.02	37.9	20.55	High	High	High	High	High	High	High	High	High
AAS95437.1	957	ribosomal protein S18	47.807	46	5	59	5	87	10.3	10.62	100.96	5	0	1.027	1.145	0.996	0.96948	0.993965	0.98323	61.28	108.18	96.92	5.24909e+06	3.54569e+06	5.32652e+06	32.35	36.6	18.3	High	High	High	High	High	High	High	High	High
AAS95785.1	1307	ribosomal protein S19	24.158	55	5	24	5	93	10.5	10.54	28.78	5	0	0.85	0.797	0.779	0.85554	0.910301	0.870807	45.38	62.4	54.63	7.02849e+06	8.31683e+06	5.59841e+06	37.68	5.94	17.3	High	High	High	High	High	High	High	High	High
AAS95354.1	874	ribosomal protein S2	112.678	60	14	308	14	254	28.5	8.75	669.95	14	0	0.808	0.809	1.142	0.750758	0.915499	0.998377	67.41	60.1	63.93	3.46611e+07	3.35658e+07	3.26379e+07	12.46	7.71	9.52	High	High	High	High	High	High	High	High	High
AAS96372.1	1896	ribosomal protein S20	15.872	36	2	45	2	87	9.6	11.93	181.46	2	0	1.804	1.101	0.61	0.043671	0.993965	0.664969	88.84	45.69	68.96	2.41722e+06	4.65198e+06	2.66173e+06	25.66	61.62	37.78	High	High	High	High	High	High	High	High	High
AAS95787.1	1309	ribosomal protein S3	79.707	62	14	220	14	212	24.4	10.23	352.16	14	0	0.975	0.759	0.758	0.988116	0.870056	0.847993	61.37	67	75.3	9.84226e+07	1.09783e+08	6.41823e+07	6.99	8.91	3.13	High	High	High	High	High	High	High	High	High
AAS95806.1	1328	ribosomal protein S4	103.498	46	14	307	14	208	23.9	10.02	737.32	14	0	1.066	0.635	0.602	0.904766	0.682075	0.645179	39.18	65.79	66.53	8.97137e+07	1.04079e+08	6.09583e+07	16.07	10.75	10.31	High	High	High	High	High	High	High	High	High
AAS95798.1	1320	ribosomal protein S5	114.45	77	13	272	13	163	17.1	10.1	451.83	13	0	1.028	0.863	0.804	0.944842	0.94918	0.896116	65.43	45.02	63	9.9726e+07	1.07689e+08	7.81601e+07	22.45	19.93	12.77	High	High	High	High	High	High	High	High	High
AAS95436.1	956	ribosomal protein S6	81.39	82	9	153	9	101	11.4	5.5	295.99	9	0	1.175	1.115	0.939	0.7061	0.993965	0.974669	36.24	66.01	46.18	6.0442e+07	6.68103e+07	6.18559e+07	12.08	16.38	4.47	High	High	High	High	High	High	High	High	High
AAS95777.1	1299	ribosomal protein S7	93.915	64	12	195	12	156	17.8	10.11	435.16	12	0	0.988	0.608	0.566	0.971674	0.630332	0.563493	61.35	54.84	63.41	7.66136e+07	1.07274e+08	5.23694e+07	21.5	11.54	26.8	High	High	High	High	High	High	High	High	High
AAS95795.1	1317	ribosomal protein S8	67.163	64	9	136	9	126	13.9	9.26	209.8	9	0	1.074	0.764	0.588	0.887095	0.870104	0.616353	79.76	56.38	76.26	2.80253e+07	3.39712e+07	1.84348e+07	56.29	17.21	4.51	High	High	High	High	High	High	High	High	High
AAS96991.1	2519	ribosomal protein S9	43.597	48	8	78	8	130	14.9	10.86	156.93	8	0	1.011	0.527	0.649	0.957487	0.434524	0.730157	89.72	39.26	79.19	4.41665e+07	3.1447e+07	1.74706e+07	33.26	22.71	10.77	High	High	High	High	High	High	High	High	High
AAS96107.1	1629	ribosomal subunit interface protein	36.545	31	7	60	7	179	20.6	6.57	125.74	7	0	0.571	0.842	2.062	0.0359276	0.93275	0.631272	117.27	87.43	64.4	1.994e+07	1.38767e+07	2.02968e+07	40.96	17.9	14.75	High	High	High	High	High	High	High	High	High
AAS95350.1	870	ribosome recycling factor	45.539	49	9	55	9	186	21	6.89	69.82	9	0	1.68	1.138	0.829	0.0227475	0.993965	0.91074	59.81	67.72	62.17	6.59646e+06	1.10061e+07	6.70662e+06	18.38	20.53	56.96	High	High	High	High	High	High	High	High	High
AAS97003.1	2531	ribulose-phosphate 3-epimerase	35.066	32	6	28	6	222	24.2	6.34	57.09	6	0	0.964	0.973	1.089	0.971674	0.993965	0.999667	52.37	47.48	87.43	2.71218e+06	2.13874e+06	4.22883e+06	30.53	15.42	22.04	High	High	High	High	High	High	High	High	High
AAS97209.1	2737	RNA methyltransferase, TrmH family	10.031	9	2	6	2	254	28.1	6.7	6.28	2	0	1.179	0.977	0.916	0.925436	0.993965	0.989128	89.35	79.74	28.62	865071	604322	600281	63.26	9.6	24.56	High	High	Peak Found	Peak Found	High	Not Found	Peak Found	High	Peak Found
AAS94526.1	42	RNA methyltransferase, TrmH family, group 3	46.598	23	8	60	8	383	40.6	7.78	95.47	8	0	0.909	0.717	0.85	0.948239	0.817705	0.926085	59.49	51.98	47.01	9.96102e+06	1.17265e+07	1.04133e+07	5.24	16.93	19.96	High	High	High	High	High	High	High	High	High
AAS96106.1	1628	RNA polymerase sigma-54 factor	47.766	27	11	40	11	476	54	4.97	18.4	11	0	1.029	1.1	0.96	0.971674	0.993965	0.980264	40.77	44.84	53.56	2.924e+06	3.3919e+06	3.31322e+06	15.46	15.35	15.87	High	High	High	High	High	Peak Found	High	High	High
AAS96265.1	1788	RNA polymerase sigma-70 factor	170.703	46	28	196	28	590	67.5	5.36	286.02	28	0	0.914	1.12	1.263	0.952046	0.993965	0.98323	52.38	48.86	49.23	2.64594e+07	2.78366e+07	2.40571e+07	1.57	15.08	5.99	High	High	High	High	High	High	High	High	High
AAS96688.1	2215	RNA-binding protein	36.574	72	4	60	3	89	9.8	5.19	135.7	4	0	1.973	2.446	1.361	0.000966828	0.29325	0.954743	60.45	62.2	42.53	1.30211e+07	2.72266e+07	4.53671e+07	58.4	27.4	27.38	High	High	High	High	High	High	High	High	High
AAS97677.1	3207	RNB-like family protein	34.739	19	11	19	11	698	77.6	5.68	15.96	11	0	1.202	1.415	1.003	0.903612	0.929307	0.999667	57.84	60.38	101.23	673198	1.08487e+06	1.0124e+06	10.49	7.28	7.93	High	Peak Found	Peak Found	High	High	High	High	High	High
AAS97716.1	3246	RND efflux system, outer membrane protein, NodT family	54.53	25	11	38	11	541	58.3	6.55	43.8	11	0	0.714	1.537	1.893	0.653962	0.870104	0.724595	53.24	69.38	52.29	1.85396e+06	1.2567e+06	2.57063e+06	11.57	21.91	13.43	High	High	High	High	High	High	High	High	High
AAS94546.1	62	RND efflux system, outer membrane protein, NodT family	130.945	45	18	115	18	504	53.5	5.19	186.98	18	0	0.856	1.097	1.27	0.866809	0.993965	0.980346	48.69	61.91	62.93	1.668e+07	1.3871e+07	1.78447e+07	16.09	24.4	3.56	High	High	High	High	High	High	High	High	High
AAS95269.1	789	rod shape-determining protein MreB	212.939	57	22	273	22	346	37.3	5.97	479.77	22	0	1.089	0.673	0.577	0.866809	0.745742	0.59336	52.57	50.68	46.77	4.86487e+07	5.91647e+07	3.18625e+07	10.12	7.44	11.55	High	High	High	High	High	High	High	High	High
AAS96158.1	1681	rod shape-determining protein MreB	62.883	41	12	50	12	340	37.1	8.57	62.14	12	0	0.932	0.842	1.128	0.962046	0.937226	0.999667	70.67	50.6	77.37	6.51996e+06	5.48758e+06	5.51544e+06	19.67	29.38	9.31	High	High	High	High	High	High	High	High	High
AAS97655.1	3185	rubredoxin-oxygen oxidoreductase	214.334	61	22	300	22	402	45	6.43	490.32	22	0	0.914	2.021	1.986	0.952046	0.545703	0.675836	60.49	60.76	60.95	4.40925e+07	4.17695e+07	6.62095e+07	6.79	3.16	16.07	High	High	High	High	High	High	High	High	High
AAS97565.1	3094	rubrerythrin	42.574	36	8	51	8	191	21.5	6.73	62.37	8	0	0.855	2.469	2.683	0.855671	0.351493	0.306923	44.49	43.85	33.1	4.29116e+06	3.98813e+06	1.07819e+07	19.62	8.44	21.32	High	High	High	High	High	High	High	High	High
AAS96791.1	2318	rubrerythrin, putative	20.524	28	3	10	3	164	17.9	5.77	6.94	3	0	0.972	2.95	2.391	0.971674	0.331751	0.513039	41.26	65.39	38.97	439501	398992	1.42322e+06	46.17	20.33	8.41	High	High	High	High	High	Not Found	Peak Found	High	High
AAS96719.1	2246	S1 RNA binding domain protein	38.093	16	8	26	8	723	78.4	7.69	22.43	8	0	0.751	1.416	1.991	0.777515	0.924507	0.677894	77.47	58.62	71.48	1.40125e+06	773653	2.02524e+06	13.3	8.27	34.06	High	High	High	High	High	Peak Found	High	High	High
AAS94901.1	418	saccharopine dehydrogenase	95.095	33	11	116	11	396	44.3	5.91	155.22	11	0	1.091	0.508	0.5	0.864869	0.380537	0.40115	29.7	47.57	63.8	2.04018e+07	2.14567e+07	1.03539e+07	3.93	7.33	25.18	High	High	High	High	High	High	High	High	High
AAS96921.1	2449	S-adenosylmethionine synthetase	206.872	53	18	379	18	391	42.4	5.71	640.71	18	0	0.83	1.793	2.137	0.811099	0.710097	0.583756	47.99	49.54	61.63	5.32113e+07	4.52184e+07	7.65295e+07	6.13	14.1	18.13	High	High	High	High	High	High	High	High	High
AAS96984.1	2512	S-adenosyl-methyltransferase MraW	33.368	25	6	32	6	323	35.9	6.89	30.72	6	0	0.602	0.927	2.68	0.377443	0.993965	0.347717	85.47	46.07	112.9	1.69188e+06	1.32989e+06	1.65239e+06	7.23	24.04	22.57	High	High	High	High	High	Peak Found	High	High	High
AAS94982.1	500	selenocysteine-specific translation elongation factor	87.201	28	16	71	16	642	69.9	7.27	104.23	16	0	1.068	0.696	0.755	0.900092	0.791343	0.843364	61.2	63.18	71.68	1.36294e+07	1.19347e+07	3.82059e+07	67.71	11.03	15.42	High	High	High	High	High	High	High	High	High
AAS95425.1	945	sensor histidine kinase	37.337	15	9	22	8	810	89.4	5.76	18.49	9	1	1.425	0.92	0.409	0.528858	0.992001	0.311032	58.57	84.59	116.97	2.0398e+06	2.53086e+06	1.86664e+06	22.16	24.29	10.74	High	High	High	High	High	High	Peak Found	High	High
AAS94603.1	119	sensor histidine kinase	16.76	6	3	14	3	554	60.6	6.27	23.58	3	0	1.378	0.761	0.512	0.475264	0.913897	0.495158	43.48	43.32	46.96	2.63008e+06	3.92707e+06	1.66763e+06	25.17	4.31	35.42	High	High	High	High	High	Not Found	High	High	High
AAS94623.1	139	sensor histidine kinase	27.916	14	6	14	6	570	61.6	6.55	17.31	6	0	0.997	0.876	0.568	0.996749	0.966741	0.717654	66.88	68.46	92.8	2.29462e+06	2.27874e+06	1.44067e+06	7.25	6.15	7.47	High	Peak Found	Not Found	High	High	High	High	High	High
AAS97686.1	3216	sensor histidine kinase	72.579	31	13	72	12	565	62.1	6.61	82.95	13	1	1.224	0.754	0.646	0.611471	0.866559	0.724595	66.61	79.18	75.13	7.27601e+06	8.06413e+06	5.68699e+06	41.2	46.23	11.01	High	High	High	High	High	High	High	High	High
AAS94593.1	109	sensor histidine kinase	15.488	11	5	5	5	410	44.8	7.93	2.99	5	0	1.078	0.309	0.503	0.971674	0.205893	0.752573	18.32	64.54	75.85	493991	378844	345799	5.37	9.79	17.59	Peak Found	High	Peak Found	High	Peak Found	Peak Found	High	High	Peak Found
AAS97691.1	3221	sensor histidine kinase	34.037	17	7	16	7	508	55.8	6.24	18.59	7	0	0.755	0.842	1.474	0.791465	0.964089	0.896116	60.45	70.78	62.1	1.38485e+06	685128	1.58685e+06	6.41	51.66	55.78	High	High	High	High	High	Peak Found	High	High	High
AAS97433.1	2962	sensor histidine kinase	92.945	38	18	69	18	577	64	7.31	87.19	18	0	1.023	1.201	1.059	0.95033	0.992001	0.997949	52.31	70.48	72.89	1.35885e+07	1.00056e+07	8.26328e+06	4.3	2.69	39.48	High	High	High	High	High	High	High	High	High
AAS95412.1	932	sensor histidine kinase	42.088	26	8	31	7	391	42.7	6.65	31.45	8	0	1.205	1.348	0.987	0.877865	0.949453	0.99805	42.85	70.58	30.9	1.14368e+06	1.3903e+06	1.70288e+06	39.59	8.14	26.69	High	High	Peak Found	High	High	High	High	High	High
AAS95235.1	755	sensor histidine kinase, putative	94.321	43	15	85	15	455	51.3	6.21	116.46	15	0	1.097	0.906	0.892	0.859613	0.964364	0.953073	52.64	69.51	45.09	8.08178e+06	7.2845e+06	5.80006e+06	9.17	12.1	14	High	High	High	High	High	High	High	High	High
AAS96754.1	2281	sensor histidine kinase/response regulator	36.545	16	9	24	9	733	79.6	6.4	18.74	9	0	1.024	1.812	1.685	0.976581	0.723378	0.820248	57.35	74.55	101.14	1.94046e+06	2.16583e+06	2.41885e+06	46.97	22.92	10.34	High	High	Peak Found	High	Peak Found	Peak Found	High	High	High
AAS97438.1	2967	sensor histidine kinase/response regulator	16.332	10	3	9	3	374	40.8	5.71	9.93	3	0	1.422	0.862	0.695	0.708029	0.981424	0.896116	14.44	51.1	36.19	935622	821345	758357	5.87	13.1	28.79	High	High	High	High	High	Not Found	High	High	Peak Found
AAS97439.1	2968	sensor histidine kinase/response regulator	35.603	22	6	38	6	398	43.6	5.68	46.51	6	0	1.098	0.91	0.799	0.918347	0.968524	0.896116	62.5	84.55	41.19	3.42779e+06	3.92415e+06	2.65794e+06	22.26	24.78	6.14	High	High	High	High	High	High	High	High	High
AAS97149.1	2677	sensor histidine kinase/response regulator	31.31	24	9	26	9	487	53.7	5.24	30.76	9	0	0.979	0.682	0.769	0.985566	0.845157	0.91925	69.46	53.1	88.61	2.08877e+06	2.16844e+06	1.56351e+06	20.73	17.63	23.04	High	High	High	High	High	High	High	High	High
AAS95162.1	681	sensor histidine kinase/response regulator	65.755	27	14	57	14	667	72.6	6.38	51.95	14	0	0.864	0.907	0.961	0.866809	0.964364	0.974669	78.94	56.4	76.18	5.46831e+06	5.0328e+06	4.93879e+06	9.43	21.66	0.52	High	High	High	High	High	High	High	High	High
AAS97533.1	3062	sensor histidine kinase/response regulator	106.609	22	20	79	20	1080	114	5.44	92.23	20	0	1.054	1.028	1.008	0.944842	0.993965	0.984176	52.14	61.46	49.89	6.90871e+06	4.57206e+06	5.77125e+06	17.51	22.52	9.66	High	High	High	High	High	High	High	High	High
AAS97851.1	3382	sensor protein ZraS	23.568	7	5	12	5	679	72.5	6.38	11.47	5	0	0.883	1.039	2.303	0.933234	0.997631	0.499175	95.21	41.56	86.77	1.8345e+06	780011	2.28824e+06	8.73	8.49	23.98	High	Peak Found	High	High	High	Peak Found	High	High	High
AAS97018.1	2546	sensory box histidine kinase	37.613	16	8	22	8	540	59.8	6.42	31.77	8	0	1.666	0.678	0.516	0.0965658	0.809363	0.464711	54.27	54.95	45.71	2.85898e+06	4.54835e+06	1.88202e+06	16.57	37.67	3.58	High	High	High	High	High	High	High	High	High
AAS97622.1	3152	sensory box histidine kinase	69.966	34	14	74	14	553	59.9	6.13	64.42	14	0	1.025	0.77	0.672	0.96948	0.877761	0.737328	49.16	59.66	56.8	5.51394e+06	5.96396e+06	4.60489e+06	9.66	14.22	4.25	High	High	High	High	High	High	High	High	High
AAS94753.1	270	sensory box histidine kinase	50.688	15	11	48	11	756	84.1	7.09	58.75	11	0	1.094	0.793	0.695	0.918347	0.91853	0.778094	46.37	51.79	53.06	4.70964e+06	4.37476e+06	3.07343e+06	40.79	42.89	14.21	High	High	High	High	High	High	High	High	High
AAS97803.1	3335	sensory box histidine kinase	16.746	10	5	11	5	593	66.8	6.51	7.7	5	0	1.427	0.728	0.72	0.777515	0.915515	0.916746	20.87	41.62	31.93	641457	601844	540048	12.44	12.49	5.38	High	High	High	High	Peak Found	Not Found	High	High	High
AAS94509.1	25	sensory box histidine kinase	18.775	8	5	12	5	719	78.2	6.38	11.77	5	0	0.893	0.661	0.734	0.944749	0.870611	0.922718	68.54	55.2	38.02	794038	849726	574895	48.64	6.33	29.35	High	Peak Found	High	High	High	Peak Found	High	High	High
AAS96885.1	2412	sensory box histidine kinase	37.065	12	8	18	8	1035	112.7	5.62	19.07	8	0	1.796	1.364	0.799	0.329306	0.953607	0.953073	40.22	44.86	42.06	875027	1.07258e+06	1.14966e+06	19.11	13.5	9.6	High	High	Peak Found	High	Peak Found	Not Found	High	High	High
AAS94371.1	A0087	sensory box histidine kinase	44.004	11	10	31	10	1037	113.5	5.66	29.53	10	0	0.921	0.624	0.856	0.944842	0.721433	0.964272	49.49	41.28	71.96	2.92795e+06	2.3789e+06	1.95687e+06	4.13	20.02	7.37	High	High	High	High	High	Peak Found	High	High	High
AAS95201.1	721	sensory box histidine kinase	83.49	25	18	47	17	936	102.8	5.95	53.5	18	1	1.021	1.057	1.33	0.950414	0.993965	0.968173	93.13	57.82	81.15	7.93795e+07	4.52866e+06	6.63482e+07	7.69	6.87	21.31	High	High	High	High	High	Peak Found	High	High	High
AAS95217.1	737	sensory box histidine kinase	64.532	18	11	41	10	746	82.4	6.48	41.12	11	0	0.899	0.898	1.251	0.938474	0.966741	0.975338	41.07	58.9	67.84	2.7796e+06	1.59097e+06	2.33673e+06	10.1	15.69	9.67	High	High	High	High	High	High	High	High	High
AAS97403.1	2931	sensory box histidine kinase	42.625	18	10	24	10	733	80.8	8.92	34.22	10	0	1.186	1.163	1.213	0.903612	0.993965	0.976855	65.45	54.35	44.85	1.64698e+06	1.12281e+06	2.43973e+06	12.09	5.97	14.56	High	High	Peak Found	High	High	Peak Found	High	High	High
AAS96434.1	1958	sensory box histidine kinase	19.68	8	5	13	5	865	94.2	6.3	13.09	5	0	0.623	0.854	0.872	0.49816	0.964364	0.98323	53.24	77.77	46.4	1.19368e+06	920126	940893	10.99	9.9	6.65	High	High	High	High	High	Not Found	High	High	High
AAS94576.1	92	sensory box histidine kinase	65.941	17	15	44	14	1105	121.9	6.52	33.05	15	0	0.76	0.937	0.949	0.636969	0.98887	0.98323	75.01	52.22	50.6	3.19355e+06	2.42243e+06	2.98291e+06	11.15	3.51	3.39	High	High	High	High	High	High	High	High	High
AAS96552.1	2079	sensory box histidine kinase	16.764	11	6	10	6	870	94.8	6.07	1.61	6	0	1.052	1.217	1.15	0.971674	0.986041	0.985375	37.48	85.83	71.44	647019	678161	933615	5.69	4.95	14.1	Peak Found	High	Peak Found	High	Peak Found	Not Found	High	High	High
AAS95063.1	582	sensory box histidine kinase	43.601	18	10	28	10	672	74.9	6.7	31.29	10	0	1.281	1.083	0.941	0.781025	0.993965	0.990241	44.19	49.28	44.59	1.57606e+06	1.9602e+06	1.75601e+06	8.64	9.75	11.75	High	High	High	High	High	Peak Found	High	High	High
AAS97532.1	3061	sensory box histidine kinase	92.006	29	19	84	19	764	85.4	5.8	110.55	19	0	0.991	1.046	1.061	0.971674	0.993965	0.997949	49.56	50.07	55.37	7.92875e+06	7.07275e+06	7.68567e+06	10.32	3.92	11.44	High	High	High	High	High	High	High	High	High
AAS94814.1	331	sensory box histidine kinase, putative	36.015	13	10	30	10	973	105.9	6.11	23.32	10	0	1.113	1.163	0.896	0.927093	0.993965	0.975338	52.55	64.28	35.23	2.6267e+06	2.1068e+06	2.4889e+06	19.14	7.87	25.1	High	High	High	High	High	High	High	High	High
AAS96602.1	2129	sensory box histidine kinase/response regulator	12.52	7	4	6	4	823	89.3	5.86	0	4	0	1.582	0.386	0.117	0.682091	0.409207	0.0141073	80.31	64.06	44.83	658362	234615	313001	20.48	17.53	10.7	Peak Found	High	Peak Found	High	Not Found	Not Found	Peak Found	High	High
AAS94741.1	258	sensory box histidine kinase/response regulator	58.511	26	12	48	12	657	72.5	5.26	52.94	12	0	1.091	0.406	0.408	0.925408	0.209494	0.260783	34.72	60.84	60.78	4.13274e+06	3.68119e+06	1.31499e+06	17.67	2.41	9.26	High	High	High	High	High	High	High	High	High
AAS97088.1	2616	sensory box histidine kinase/response regulator	52.873	13	10	44	10	1000	109.4	5.88	57.67	10	0	0.794	1.626	1.912	0.777515	0.830619	0.717654	46.35	33.69	49.6	1.53377e+06	3.17351e+06	2.37356e+06	4.33	6.04	10.78	High	High	Peak Found	High	High	Peak Found	High	High	High
AAS97739.1	3269	sensory box histidine kinase/response regulator	44.152	15	11	28	11	839	91.3	6.98	20.28	11	0	1.32	0.612	0.611	0.580416	0.740024	0.734891	42.35	45.59	66.11	2.77199e+06	3.42033e+06	1.24509e+06	135.26	9.03	7.63	High	High	High	High	High	High	High	High	High
AAS94965.1	482	sensory box histidine kinase/response regulator	30.115	17	7	23	7	482	52.4	5.31	28.43	7	0	1.106	0.767	0.76	0.90995	0.870876	0.836097	79.95	128.73	84.94	4.4054e+06	4.20323e+06	5.89858e+06	9.63	162.13	30.35	High	High	High	High	High	High	Peak Found	High	High
AAS97529.1	3058	sensory box histidine kinase/response regulator	6.305	2	3	6	3	1223	133.6	6.4	1.65	3	0	0.809	0.821	0.642	0.874766	0.964364	0.86958	63.64	100.13	103.54	970124	599815	366167	33.2	43.31	10.63	High	High	Peak Found	High	High	Peak Found	High	Peak Found	Peak Found
AAS97516.1	3045	sensory box histidine kinase/response regulator	108.745	30	22	105	22	955	104.9	5.63	83.88	22	0	1.101	0.973	0.839	0.843634	0.993965	0.921499	53.71	58.06	57.73	7.92155e+06	8.08563e+06	8.90291e+06	21.31	50.37	49.48	High	High	High	High	High	High	High	High	High
AAS96041.1	1563	sensory box histidine kinase/response regulator	22.168	10	6	13	6	1039	114.8	6.7	4.55	6	0	1.122	0.757	0.749	0.944842	0.930904	0.931736	46.18	20.24	24.27	674533	1.17411e+06	451784	16.95	24.07	8.22	High	High	Peak Found	High	High	Not Found	High	High	High
AAS94565.1	81	sensory box histidine kinase/response regulator	19.283	9	4	12	4	576	63.6	5.54	9.08	4	0	0.957	0.617	0.771	0.971674	0.830619	0.949735	43.83	55.33	39.98	877375	874493	502216	42.38	3.08	30.63	Peak Found	High	High	High	High	Not Found	High	High	High
AAS97151.1	2679	sensory box histidine kinase/response regulator	36.111	12	9	24	9	1005	111.4	7.65	24.02	9	0	0.83	0.961	1.115	0.841736	0.993965	0.997949	65.68	56.08	67.86	2.69063e+06	2.05231e+06	2.05443e+06	13.6	8.76	14.87	High	High	High	High	High	High	High	High	High
AAS97062.1	2590	sensory box protein	113.473	36	15	128	15	521	57.2	5.44	223.17	15	0	1.11	1.208	1.044	0.832815	0.992001	0.997949	35.11	48.16	38.79	1.65689e+07	1.91044e+07	2.05288e+07	18.65	18.55	5.43	High	High	High	High	High	High	High	High	High
AAS94838.1	355	sensory box/GGDEF domain protein	35.399	18	8	24	8	607	66.1	5.48	10.43	8	0	0.753	0.784	0.844	0.777515	0.937226	0.972805	67.89	65.71	67.63	1.12716e+06	1.15801e+06	1.11967e+06	23.05	4.35	4.2	Peak Found	High	High	High	High	Peak Found	High	High	High
AAS97535.1	3064	sensory box/GGDEF domain/EAL domain protein	19.4	7	4	10	4	576	63.8	6.1	13.98	4	0	1.118	0.574	0.4	0.944842	0.793768	0.419497	92.29	74.05	73.94	984197	1.14592e+06	486328	32.65	22.13	30.89	High	High	High	High	High	High	Peak Found	High	High
AAS96905.1	2432	sensory box/GGDEF domain/EAL domain protein	35.661	8	8	18	8	1413	155.6	6.15	18.46	8	0	0.685	1.503	1.585	0.708029	0.91853	0.86563	103.65	49.09	91.82	766853	585587	1.11274e+06	18	47.8	4.08	High	High	High	High	High	High	High	High	High
AAS95668.1	1190	sensory box/GGDEF domain/EAL domain protein	7.335	5	3	6	3	926	101.5	6	0	3	0	0.671	0.651	0.816	0.747365	0.845157	0.972027	55.95	37.8	37.72	425387	346202	293790	4.2	2.63	11.49	High	High	Not Found	High	Peak Found	Not Found	High	Peak Found	Peak Found
AAS94905.1	422	sensory box/GGDEF domain/EAL domain protein	48.36	12	10	20	10	1072	118.1	6.23	20.61	10	0	0.927	1.179	1.311	0.96343	0.993965	0.972027	53.61	52.1	48.43	1.61054e+06	1.79466e+07	1.3625e+06	6.58	87.82	13.92	High	High	High	High	Peak Found	Peak Found	High	High	High
AAS94961.1	478	Ser/Thr protein phosphatase family	10.501	10	2	8	2	287	30.9	6.44	6.88	2	0	1.494	0.603	0.329	0.74978	0.793908	0.378467	24.86	67.79	65.09	343142	450205	159960	25.71	31.53	55.6	Peak Found	High	High	High	High	High	Peak Found	High	High
AAS94850.1	367	Ser/Thr protein phosphatase family protein	22.03	26	3	14	3	244	26.3	6.44	10.8	3	0	1.334	1.084	0.809	0.791465	0.993965	0.964272	27.52	28.11	12.75	717917	931556	990176	8.15	13.95	18.61	High	High	High	High	High	Not Found	Peak Found	High	High
AAS95681.1	1203	serine hydroxymethyltransferase	208.401	59	25	449	25	412	44.3	6.86	709.27	25	0	0.804	1.185	1.408	0.74007	0.993965	0.944024	55.76	57.93	68.37	9.08753e+07	8.77752e+07	1.10713e+08	7.34	5.1	22.18	High	High	High	High	High	High	High	High	High
AAS95143.1	662	serine O-acetyltransferase	29.326	20	6	33	6	323	34.7	6.79	33.03	6	0	0.991	1.15	1.037	0.999866	0.993965	0.997848	45.83	32.08	38.52	3.68227e+06	3.89995e+06	3.64658e+06	30.04	16.61	14.16	High	High	High	High	High	High	High	High	High
AAS94962.1	479	serine/threonine protein kinase, putative	18.895	13	5	11	5	499	54.1	5.59	1.79	5	0	0.986	0.93	0.966	0.971674	0.993965	0.997949	67.01	50.3	82.3	719037	291863	578553	23.16	5.05	29.25	Peak Found	High	Peak Found	High	Peak Found	Peak Found	High	High	High
AAS94721.1	237	seryl-tRNA synthetase	63.047	28	12	48	12	424	47.5	5.78	65.3	12	0	1.1	1.379	1.137	0.900092	0.930904	0.999667	64.21	68.5	73.41	3.88656e+06	5.35941e+06	3.82668e+06	23.5	11.92	35.99	High	High	High	High	High	High	High	High	High
AAS94599.1	115	shikimate 5-dehydrogenase	26.596	24	6	11	6	301	32.1	7.21	13.21	6	0	2.13	2.911	1.663	0.120997	0.384265	0.812714	95.39	46.86	49.62	292450	2.02384e+06	862204	6.17	12.18	22.03	High	Peak Found	Peak Found	Peak Found	High	Peak Found	High	High	High
AAS95372.1	892	shikimate kinase	10.259	25	4	4	4	175	18.6	6.58	1.63	4	0	0.577	0.895	0.682	0.539589	0.967049	0.91123	100.56	23.92	86.78	268176	431265	307406	10.08	25.32	8.87	Not Found	High	Peak Found	Peak Found	High	Not Found	High	Peak Found	Peak Found
AAS96993.1	2521	shikimate kinase	15.419	16	2	16	2	180	19.6	5	17.09	2	0	1.055	1.258	1.079	0.971674	0.966741	0.997949	51.77	35.28	26.08	798393	759673	922810	14.81	9.96	18.15	High	High	High	High	High	Not Found	High	High	High
AAS96062.1	1584	sigma 70 family protein	32.054	21	6	41	6	356	40.9	4.96	43.35	6	0	0.962	1.233	1.238	0.971674	0.968404	0.984176	43.26	46.08	50.41	3.09413e+06	3.56927e+06	3.85869e+06	20.27	23.48	19.01	High	High	High	High	High	High	High	High	High
AAS97494.1	3023	sigma-54 dependent DNA-binding response regulator	59.429	26	11	82	11	474	52.3	5.88	105.46	11	0	1.086	0.855	0.739	0.870738	0.947727	0.833374	54.96	70.02	56.24	6.98139e+06	8.70333e+06	6.45872e+06	8.8	9.41	25.6	High	High	High	High	High	High	High	High	High
AAS95100.1	619	sigma-54 dependent transcriptional regulator	22.703	15	5	14	5	479	53.3	8.92	5.27	5	0	1.274	0.504	0.455	0.824746	0.668519	0.562095	48.32	53.04	68.32	1.14719e+06	1.37012e+06	331162	30.23	3.95	39.19	High	High	High	High	High	Peak Found	Peak Found	High	High
AAS97366.1	2894	sigma-54 dependent transcriptional regulator	62.487	37	11	43	11	349	38.6	6.16	48.38	11	0	1.182	0.712	0.609	0.794001	0.845157	0.645179	66.48	72.01	68.82	3.89854e+06	5.00447e+06	3.05361e+06	30.68	17.79	18.5	High	High	High	High	High	High	High	High	High
AAS94360.1	A0100	sigma-54 dependent transcriptional regulator	23.309	11	5	14	5	575	59.9	6.19	26.66	5	0	1.053	0.55	0.59	0.971674	0.674147	0.765657	42.51	52.19	51.87	1.62609e+06	1.37361e+06	1.10627e+06	8.91	15.85	22.19	High	High	High	High	High	Not Found	High	High	Peak Found
AAS95050.1	569	sigma-54 dependent transcriptional regulator	26.606	15	6	19	6	526	57.8	7.9	10.32	6	0	1.087	0.836	0.728	0.958591	0.966741	0.915503	56.64	39.11	35.2	945575	1.00727e+06	749709	18.56	8.27	5.9	High	High	Peak Found	High	Peak Found	Peak Found	High	High	High
AAS97431.1	2960	sigma-54 dependent transcriptional regulator	28.23	27	8	24	8	474	51.5	8.29	9.19	8	0	1.5	1.118	0.806	0.55637	0.993965	0.953073	54.13	72.75	44.38	1.47778e+06	1.81934e+06	1.81871e+06	18.9	28.38	21.87	High	High	Peak Found	High	High	High	High	High	High
AAS97612.1	3142	sigma-54 dependent transcriptional regulator	25.551	16	6	17	5	567	61.1	7.78	9.87	6	0	1.411	1.291	0.976	0.800907	0.981424	0.997949	47.26	78.55	39.82	516636	507627	510505	26.19	3.39	5.23	Peak Found	High	High	High	High	Not Found	High	High	High
AAS97299.1	2827	sigma-54 dependent transcriptional regulator	12.31	11	5	5	4	473	53.5	8.06	0	5	0	1.024	0.894	1.096	0.999866	0.966741	0.999667	31.41	49.99	28.17	195210	156861	198534	24.98	17.46	6.02	Peak Found	High	Peak Found	Peak Found	High	Not Found	Peak Found	High	High
AAS95160.1	679	sigma-54 dependent transcriptional regulator/response regulator	7.226	5	2	6	2	488	54.4	6.42	3.45	2	0	12.501	0.919	0.21	8.90645e-11	0.992001	0.0401007	65.59	54.78	112.91	420804	684715	716698	71.35	146.27	32.6	Peak Found	High	High	High	Peak Found	Peak Found	Peak Found	High	High
AAS96867.1	2394	sigma-54 dependent transcriptional regulator/response regulator	14.549	12	4	16	4	463	51.5	7.11	4.19	4	0	0.755	0.461	0.351	0.823302	0.568207	0.363053	28.8	108.08	51.41	732183	658979	339622	27.48	10.81	98.48	High	High	High	High	High	Not Found	Peak Found	High	High
AAS94602.1	118	sigma-54 dependent transcriptional regulator/response regulator	52.202	21	8	51	8	454	50.4	6.49	58.4	8	0	1.313	0.796	0.585	0.575305	0.922868	0.616353	47.79	43.96	43.87	3.96596e+06	4.69221e+06	3.13862e+06	15.46	4.6	22.31	High	High	High	High	High	High	High	High	High
AAS97690.1	3220	sigma-54 dependent transcriptional regulator/response regulator	26.058	11	5	25	5	459	51.3	5.53	45.34	5	0	0.599	1.312	2.046	0.272642	0.956195	0.649322	58.16	45	76.42	2.17148e+06	1.47968e+06	2.37083e+06	8.9	78.46	25.37	High	High	High	High	High	High	High	High	High
AAS95897.1	1419	sigma-54 dependent transcriptional regulator/response regulator	51.248	26	11	42	10	459	51.2	6.2	46.82	11	1	0.825	0.545	0.663	0.794001	0.537176	0.761085	48.08	69.31	80.39	4.56918e+06	4.01813e+06	2.16013e+06	15.35	22.93	2.51	High	High	High	High	High	High	High	High	High
AAS95426.1	946	sigma-54 dependent transcriptional regulator/response regulator	44.876	20	7	41	7	476	52.6	5.71	42.77	7	0	0.977	0.795	0.784	0.988116	0.910737	0.864178	50.08	66.24	43.38	4.29445e+06	4.026e+06	5.06318e+06	41.95	35.93	24.5	High	High	High	High	High	High	High	High	High
AAS95224.1	744	sigma-54 dependent transcriptional regulator/response regulator	37.496	21	8	30	8	569	62.4	6.67	25.85	8	0	1.32	1.035	0.802	0.372159	0.993965	0.896116	63.56	51.2	52.44	1.13451e+07	1.64899e+07	1.61338e+07	59.91	43.14	14.91	High	High	High	High	High	High	High	High	High
AAS94594.1	110	sigma-54 dependent transcriptional regulator/response regulator	24.38	15	6	16	6	476	52.5	5.86	13.49	6	0	0.743	0.875	0.853	0.575863	0.956732	0.949735	53.4	33.52	48.62	3.15311e+06	3.06966e+06	2.59055e+06	11.33	21.3	9.5	High	High	High	High	High	Peak Found	High	High	High
AAS96587.1	2114	sigma-54 dependent transcriptional regulator/response regulator	9.417	6	3	12	3	462	50.8	7.91	14.46	3	0	1.047	1.059	1.405	0.954517	0.993965	0.950061	87.22	52.73	110.67	7.59407e+06	383993	8.08251e+06	68.3	162.4	30.03	High	High	High	High	High	Peak Found	High	High	High
AAS97406.1	2934	sigma-54 dependent transcriptional regulator/response regulator	60.706	27	10	42	10	472	51.8	5.45	46.77	10	0	0.919	0.948	0.841	0.944842	0.993965	0.953073	44.34	77.44	79.74	2.49776e+06	2.57796e+06	1.99956e+06	14.89	13.93	20.76	High	High	High	High	High	High	High	High	High
AAS95184.1	704	signal peptidase I	37.163	49	10	48	10	199	23	6.7	57.5	10	0	0.975	0.659	0.79	0.988116	0.722096	0.882306	53.56	40.23	61.59	1.15386e+07	1.07945e+07	8.98359e+06	36.69	40.33	11.33	High	High	High	High	High	High	High	High	High
AAS95320.1	840	signal recognition particle protein	115.128	54	23	109	23	508	54.8	9.66	108.73	23	0	1.134	1.093	0.81	0.787301	0.994465	0.896116	50.06	51.02	41.42	1.04913e+07	9.9131e+06	9.8881e+06	8.34	17.95	2.08	High	High	High	High	High	High	High	High	High
AAS97530.1	3059	signal recognition particle-docking protein FtsY	60.086	26	11	45	11	488	53.1	5.16	55.99	11	0	1.419	2.087	1.41	0.270112	0.526215	0.943933	84.36	76.11	54.21	2.91718e+06	1.10286e+07	4.90457e+06	45.67	3.2	5.83	High	High	High	High	High	Peak Found	High	High	High
AAS96695.1	2222	single-strand binding protein	60.274	74	12	94	12	176	19.4	5.71	128.61	12	0	0.798	0.888	1.11	0.714686	0.956732	0.999667	31.62	44.33	69.83	1.65869e+07	1.51053e+07	1.4863e+07	19.88	18.84	18.04	High	High	High	High	High	High	High	High	High
AAS95384.1	904	single-stranded-DNA-specific exonuclease RecJ	26.529	12	5	15	5	571	61.9	6.54	14.04	5	0	1.329	1.276	0.913	0.784406	0.966741	0.985375	42.5	33.43	30.26	1.33078e+06	865933	961191	2.6	15.25	21.83	Peak Found	High	High	High	High	High	High	High	High
AAS95941.1	1463	siroheme synthase, N-terminal domain protein	6.905	14	2	6	2	225	23.8	6.28	0	2	0	0.712	0.612	0.822	0.7061	0.804124	0.969446	98.6	97.62	25.64	1.34803e+06	653904	576387	78.4	12.9	26.06	Peak Found	High	High	Peak Found	High	Not Found	High	High	High
AAS97300.1	2828	site-specific recombinase, phage integrase family	20.976	15	5	10	5	394	43.8	9.83	11.14	5	0	0.684	0.471	0.697	0.611471	0.537163	0.896116	38.35	69.52	45.17	1.47977e+06	889081	747015	4.67	8.8	15.3	High	High	High	High	Peak Found	Peak Found	Peak Found	High	Peak Found
AAS96804.1	2331	Smr family protein	9.11	6	2	5	2	409	43.9	8.78	8.58	2	0	1.536	1.993	0.678	0.708193	0.71171	0.877484	17.56	75.12	31.95	524735	497503	971576	10.67	17.24	5.05	High	High	Not Found	High	Peak Found	Not Found	High	High	Peak Found
AAS96558.1	2085	Snf2 family protein	160.733	34	28	152	28	1071	123	5.91	173.16	28	0	0.734	0.707	0.846	0.497526	0.802676	0.925459	57.03	57.64	64.45	2.31892e+07	1.96486e+07	1.55843e+07	8.42	18.36	10.43	High	High	High	High	High	High	High	High	High
AAS94929.1	446	sodium/solute symporter family protein	16.95	7	4	18	4	515	54.4	9.28	12.42	4	0	1.008	0.53	0.476	0.999866	0.65788	0.563493	38.65	73.28	75.91	1.56948e+06	1.72482e+06	693679	12.01	18	87.7	High	High	High	High	High	High	High	Peak Found	High
AAS95572.1	1092	sodium-dependent symporter family protein	17.19	9	3	13	3	453	47.9	9.03	5.96	3	0	0.799	0.916	1.378	0.866809	0.993965	0.947979	51.65	49.09	42.16	612929	454422	694819	11.81	26.99	17.65	High	High	High	High	Peak Found	Not Found	High	High	High
AAS97824.1	3355	SPFH domain/Band 7 family protein	143.77	67	15	233	15	251	27.7	5.73	382.69	15	0	0.7	1.143	1.255	0.348725	0.993965	0.98323	61.35	64.19	42.24	5.98278e+07	5.2385e+07	5.20951e+07	10.96	18.24	0.99	High	High	High	High	High	High	High	High	High
AAS94833.1	350	spore coat polysaccharide biosynthesis protein spsF	12.548	23	3	8	3	227	25.6	5.6	6.18	3	0	1.423	0.989	0.665	0.837409	0.993965	0.901583	33.98	22.39	24.83	237953	304599	244996	8.2	16.35	12.83	High	High	Not Found	High	Peak Found	Peak Found	Not Found	High	High
AAS95218.1	738	substrate-binding protein, putative	25.662	18	6	12	6	373	39.4	5.54	10.76	6	0	0.867	0.762	0.722	0.914157	0.915515	0.896116	65.13	35.95	123.91	2.06919e+06	1.90795e+06	1.73822e+06	8.57	20.89	12.3	High	High	High	Peak Found	High	High	High	High	High
AAS96610.1	2137	succinyl-CoA synthase, beta/alpha subunits	66.772	26	13	52	13	709	74.5	6.49	32.94	13	0	0.909	0.259	0.304	0.948239	0.00951714	0.0448722	51.13	69.53	82.92	8.47874e+06	7.57123e+06	7.77332e+06	15.74	5.55	29.88	High	High	High	High	High	High	High	High	High
AAS95502.1	1022	SUF system FeS assembly ATPase SufC, putative	56.072	33	9	46	9	258	28.5	6.98	60.92	9	0	0.914	1.03	1.077	0.952046	0.993965	0.998377	62.58	53.97	63.52	5.57881e+06	7.05744e+06	6.1024e+06	14.67	19.78	6.84	High	High	High	High	High	High	High	High	High
AAS97694.1	3224	sugar fermentation stimulation protein	16.956	13	2	11	2	242	26.8	8.03	10.51	2	0	1.239	0.841	0.694	0.915461	0.964364	0.896116	25.38	33.85	14.84	476576	655926	472070	31.48	9.44	27	High	High	High	High	High	Not Found	High	High	High
AAS95773.1	1295	sulfate adenylyltransferase	339.124	74	35	1170	35	427	47.4	6.47	2210.68	35	0	0.723	0.794	1.096	0.442146	0.901395	0.999667	57.81	65.09	68.61	6.08248e+08	6.35731e+08	5.00744e+08	16.71	4.03	11.25	High	High	High	High	High	High	High	High	High
AAS94762.1	279	sulfate permease family protein	11.669	6	3	10	3	568	60.6	7.05	6.44	3	0	1.97	1.787	0.835	0.270467	0.793085	0.972027	70.65	47.04	85.57	462765	1.16047e+06	979946	15.25	22.6	29.29	High	High	High	High	High	Peak Found	High	High	High
AAS94537.1	53	sulfate permease, putative	29.285	13	6	27	6	678	70.8	6.92	30.66	6	0	0.762	1.271	1.528	0.784406	0.964364	0.867606	70.79	69.91	40.48	1.32237e+06	976183	1.459e+06	38.73	31.38	7.19	High	High	High	High	High	Peak Found	High	High	High
AAS96475.1	1999	sulfate transporter family protein	19.388	7	4	10	4	714	77.2	6.33	13.38	4	0	0.663	0.691	0.832	0.601361	0.870056	0.972027	49.54	55.72	46.11	1.5214e+06	491637	1.5493e+06	24.47	10.21	15.37	High	High	High	High	Peak Found	Not Found	High	Peak Found	High
AAS96075.1	1597	sulfite reductase, assimilatory-type	88.34	56	13	113	13	218	23.8	7.88	206.4	13	0	0.992	1.077	1.251	0.971674	0.999616	0.98323	44.92	64.38	49.22	2.03949e+07	2.04434e+07	2.09376e+07	19.98	20.79	7.02	High	High	High	High	High	High	High	High	High
AAS94381.1	A0074	sulfotransferase family protein	60.664	55	13	69	13	229	26.8	8.38	77.73	13	0	0.842	0.909	1.065	0.832815	0.964364	0.997949	48.7	41.94	49.92	8.18504e+06	7.68757e+06	6.6095e+06	11.09	6.78	10.16	High	High	High	High	High	High	High	High	High
AAS97832.1	3363	sun protein	41.393	22	8	16	8	507	53.7	7.93	9.96	8	0	1.149	0.985	0.888	0.929563	0.993965	0.984176	72.23	78.93	54.61	1.34773e+06	1.02756e+06	921191	21.59	2.36	13.7	High	High	High	High	High	Not Found	High	High	Peak Found
AAS96883.1	2410	superoxide dismutase, Fe	12.568	18	3	12	3	228	24.4	7.49	12.52	3	0	2.353	1.997	1.099	0.0423127	0.661368	0.997848	75.37	46.63	61.65	861375	1.66036e+06	1.81189e+06	25.02	15.09	39.61	High	Peak Found	High	High	Peak Found	High	High	High	High
AAS97735.1	3265	tartrate dehydratase beta subunit, putative	11.274	16	2	10	2	183	19.4	6.96	14.58	2	0	2.606	0.79	0.233	0.000365088	0.94918	0.0171674	59.73	77.71	79.09	1.31334e+06	3.98199e+06	760581	22.48	36.92	28.57	High	High	High	Peak Found	High	High	High	High	Peak Found
AAS95048.1	567	TerC family protein	31.851	20	4	36	4	359	39	7.21	29.36	4	0	0.868	0.737	0.854	0.9107	0.901395	0.97619	44.35	56.69	64.4	2.39468e+06	1.8355e+06	1.38586e+06	16.11	13.06	35.91	High	High	High	High	High	Not Found	High	High	High
AAS96940.1	2468	tetraacyldisaccharide 4'-kinase	23.033	17	5	20	5	354	39.1	8.87	20.12	5	0	1.557	1.143	0.849	0.510511	0.993965	0.974388	52.32	45.37	35.07	1.05137e+06	1.51642e+06	1.31363e+06	33.3	6.37	7.61	High	High	Peak Found	High	High	High	High	High	High
AAS95312.1	832	tetrapyrrole methylase family protein	12.599	12	3	11	3	275	30	6.44	9.19	3	0	1.235	0.564	0.544	0.896373	0.740049	0.752573	65.27	23.93	53.77	556984	746383	305476	2.04	4.3	18.74	High	High	Not Found	High	Peak Found	Peak Found	High	High	High
AAS95889.1	1411	thiamine biosynthesis protein ThiC	44.855	32	11	43	11	429	46.2	5.94	28.58	11	0	1.055	1.267	1.262	0.953718	0.964364	0.98323	51.93	46.35	52.97	3.19951e+06	3.19645e+06	3.70294e+06	7.44	47.25	11.13	High	High	High	High	High	High	High	High	High
AAS97762.1	3293	thiamine pyrophosphate-requiring enzyme	32.303	19	9	39	9	547	59.6	6.71	50.17	9	0	0.79	1.697	1.664	0.725136	0.755537	0.833374	50.92	74.32	72.71	3.07537e+06	2.66217e+06	5.7334e+06	33.42	39.82	34.12	High	High	High	High	High	High	High	High	High
AAS94641.1	157	thiamin-monophosphate kinase	11.437	20	4	9	4	323	34.1	4.84	0	4	0	2.022	1.923	0.704	0.468239	0.830619	0.925459	42.31	34.9	39.03	199601	321263	470764	25.89	11.64	4.88	Peak Found	High	Peak Found	High	Peak Found	Peak Found	High	High	High
AAS96567.1	2094	thiG protein	33.299	33	8	33	8	265	27.6	6.23	31.49	8	0	1.003	0.875	0.918	0.988116	0.960742	0.972027	51.06	41.93	42.44	3.20342e+06	3.58814e+06	2.81123e+06	8.13	5.45	35.79	High	High	High	High	High	High	High	High	High
AAS96242.1	1765	thiH protein, putative	86.462	40	14	75	14	464	51.6	5.52	97.67	14	0	0.821	0.209	0.269	0.785933	0.00161194	0.0224425	57.88	71.01	77.7	1.51965e+07	1.05815e+07	4.39659e+06	8.89	23.32	5.67	High	High	High	High	High	High	High	High	High
AAS95475.1	995	ThiJ/PfpI family protein	80.23	50	8	174	8	195	21.2	5.82	293.71	8	0	0.564	0.985	1.828	0.0302588	0.993965	0.75228	69.72	62.92	77.11	3.94987e+07	2.43646e+07	3.84955e+07	9.53	26.59	20.87	High	High	High	High	High	High	High	High	High
AAS95479.1	999	thio:disulfide interchange protein, putative	41.851	18	8	33	8	719	74.9	6.99	32.9	8	0	0.961	0.886	0.844	0.971674	0.964364	0.953073	47.15	39.12	31.69	2.50842e+06	2.40144e+06	2.15522e+06	5.11	15.09	3.99	High	High	High	High	High	Peak Found	High	High	High
AAS94643.1	159	thioesterase family protein	15.361	20	3	6	3	173	19	7.83	11.81	3	0	1.107	2.996	3.698	0.95033	0.170452	0.0860097	23.16	172.06	228.74	1.35115e+06	1.39971e+06	3.5921e+06	12.17	54.88	2.82	Peak Found	High	High	Peak Found	Peak Found	High	Peak Found	High	High
AAS95706.1	1228	thiol peroxidase	109.634	80	13	115	13	172	18.2	5.99	163.82	13	0	1.067	2.668	1.914	0.90199	0.206782	0.717654	89.53	83.64	60.55	2.0237e+07	1.97061e+07	4.05127e+07	5.64	14.12	8.1	High	High	High	High	High	High	High	High	High
AAS96315.1	1839	thioredoxin	50.887	57	5	65	5	107	11.4	5.11	100.17	5	0	2.237	4.854	2.723	0.000485607	0.0050059	0.292792	79.43	101.37	80.46	3.69085e+06	6.08474e+06	1.37486e+07	55.52	41.95	61.41	High	High	High	High	High	High	High	High	High
AAS96064.1	1586	thioredoxin family protein	27.056	30	4	14	4	155	16.9	7.85	17.83	4	0	1.035	2.781	2.845	0.976581	0.238725	0.283276	88.56	57.21	81.16	902108	1.01338e+06	2.86741e+06	7.89	52.48	38.61	High	High	Peak Found	Peak Found	High	High	High	High	High
AAS95935.1	1457	thioredoxin reductase, putative	80.271	48	12	59	12	309	32.6	5.06	101.19	12	0	1.232	2.478	2.275	0.619661	0.338394	0.495158	68.36	74.63	81.72	4.99922e+06	9.51463e+06	1.00276e+07	10.57	4.87	32.4	High	High	High	High	High	High	High	High	High
AAS96314.1	1838	thioredoxin-disulfide reductase	54.708	43	9	36	9	307	33.1	5.22	50.16	9	0	1.171	2.191	2.035	0.866809	0.457185	0.645179	75.32	62.4	45.35	2.26152e+06	2.42891e+06	3.97529e+06	44.46	23.15	28.8	High	High	High	High	High	High	High	High	High
AAS94657.1	173	thiosulfate reductase, putative	118.326	38	23	99	23	733	80.3	7.15	99.98	23	0	0.984	0.823	0.741	0.975393	0.921572	0.833374	51.06	59.57	55.82	1.24181e+07	1.23059e+07	8.95583e+06	12.26	17.81	11.17	High	High	High	High	High	High	High	High	High
AAS96354.1	1878	threonine aldolase, low-specificity	48.899	27	7	31	7	340	37.5	6.58	36.62	7	0	1.007	1.164	1.207	0.995242	0.993965	0.984176	87.4	53.11	70.97	2.1089e+06	2.36758e+06	3.14092e+06	26.5	10.94	3.98	High	High	High	High	High	High	High	High	High
AAS97680.1	3210	threonine synthase	26.247	21	7	36	7	470	51.3	6.18	35.57	7	0	1.307	1.055	0.849	0.592095	0.996375	0.925459	31.56	65.32	56.38	2.80882e+06	4.27793e+06	2.52724e+06	8.65	24.76	30.77	High	High	High	High	High	High	High	High	High
AAS97010.1	2538	threonyl-tRNA synthetase	167.791	42	25	202	25	644	72.6	6	335	25	0	1.14	1.257	1.16	0.777515	0.966741	0.997949	42.61	70.24	66.95	4.20117e+07	3.94845e+07	4.05097e+07	22.88	11.81	10.59	High	High	High	High	High	High	High	High	High
AAS96613.1	2140	thymidylate kinase	34.87	43	6	25	6	224	24.1	5.3	20.36	6	0	0.892	1.114	1.202	0.942506	0.993965	0.980209	64.77	71.53	79.45	1.07372e+06	1.24454e+06	1.37324e+06	33.8	56.34	16.2	High	High	High	High	High	Peak Found	High	High	High
AAS96727.1	2254	thymidylate synthase ThyX	35.672	40	9	29	9	245	27.6	7.46	25.08	9	0	1.201	1.593	1.322	0.863136	0.846236	0.954743	54.8	61.25	36.78	2.12373e+06	1.52934e+06	2.69521e+06	31.28	74.51	11.63	High	High	High	High	High	High	High	High	High
AAS97574.1	3103	tolB protein, putative	59.059	34	13	36	13	456	49.5	9.45	31.96	13	0	0.976	1.761	1.824	0.984254	0.721433	0.764811	44.01	57.23	59.1	3.23233e+06	2.51617e+06	6.20486e+06	19.92	13.74	23.07	High	High	Peak Found	High	High	High	High	High	High
AAS97570.1	3099	tolQ protein	28.504	19	3	31	3	230	24.6	9.85	74.87	3	0	0.881	1.315	1.456	0.908873	0.951685	0.925459	46.81	61.3	32.84	2.67136e+06	2.61562e+06	4.34363e+06	39.49	20.4	11.91	High	High	High	High	High	Not Found	High	High	High
AAS96856.1	2383	tonB dependent receptor domain protein	22.015	5	3	20	3	875	95.6	5.2	29.42	3	0	0.44	0.378	0.801	0.00964055	0.196054	0.953073	52.53	73.3	52.55	3.34131e+06	1.28357e+06	994718	48.2	19.64	31.48	High	High	High	High	High	Peak Found	High	Peak Found	High
AAS97572.1	3101	tonB protein, putative	6.525	8	2	4	2	341	35.6	9.23	2.11	2	0	2.46	1.478	0.568	0.206274	0.938238	0.80279	62.8	30.25	72.62	363640	304267	532562	18.3	16.73	22.09	High	High	Not Found	High	Peak Found	Not Found	Not Found	Peak Found	High
AAS94584.1	100	TonB-dependent receptor	215.627	51	25	293	25	649	71.7	4.81	491.8	25	0	0.942	0.246	0.254	0.971674	0.00647862	0.0153337	60.75	56.26	54.06	5.51618e+07	6.27143e+07	1.35411e+07	13.9	10.73	25.73	High	High	High	High	High	High	High	High	High
AAS96061.1	1583	TPR domain protein	62.585	22	12	44	12	562	63.3	5.36	63.24	12	0	0.8	1.816	2.184	0.735742	0.68166	0.60953	64.79	84.31	52.96	4.50627e+06	4.21414e+06	5.66245e+06	23.11	24.03	23.59	High	High	High	High	High	Peak Found	High	High	High
AAS97742.1	3272	TPR domain protein	46.682	24	5	38	5	207	23.3	5.21	62.98	5	0	1.548	4.228	1.856	0.290644	0.0195977	0.763948	89.19	60.13	56.76	1.72699e+06	3.27534e+06	6.32315e+06	6.75	8.75	16.19	Peak Found	High	High	High	High	High	High	High	High
AAS95236.1	756	TPR domain protein	25.859	26	6	18	6	237	26.5	5.1	11.02	6	0	1.304	0.798	0.593	0.747365	0.947727	0.763948	54.1	53.6	38.83	1.6096e+06	1.98427e+06	1.29635e+06	20.46	3.54	9.97	High	High	High	High	High	High	High	High	High
AAS97051.1	2579	TPR domain protein	56.699	52	11	50	11	209	22.8	7.14	61.78	11	0	0.958	1.406	1.687	0.971674	0.921572	0.833374	99.93	74.51	79.15	5.48866e+06	5.25082e+06	6.36054e+06	34.43	12.16	13.02	High	High	High	High	High	High	High	High	High
AAS96406.1	1930	TPR domain protein	43.254	41	11	46	11	312	34	9	60.97	11	0	0.858	1.309	1.431	0.864669	0.960391	0.947979	42.39	56.04	44.26	6.42084e+06	4.74134e+06	6.49898e+06	15.18	8.68	6.36	High	High	High	High	High	High	High	High	High
AAS96543.1	2070	TPR domain protein	60.815	34	9	62	9	257	27.7	9.29	93.3	9	0	1.143	1.025	0.885	0.832815	0.993965	0.949735	53.05	51.97	39.92	5.5779e+06	6.02031e+06	6.19461e+06	9.91	13.97	13.94	High	High	High	High	High	High	High	High	High
AAS96683.1	2210	TPR domain protein	20.622	10	4	13	4	575	63.3	4.96	6.99	4	0	0.741	0.761	0.9	0.78957	0.930904	0.984268	82.67	83.41	113.28	706408	777415	476047	14.52	34.04	18.1	High	High	High	High	High	Peak Found	High	High	High
AAS95382.1	902	TPR domain protein	29.239	20	5	15	5	285	32.5	6.27	23.49	5	0	0.956	1.216	1.093	0.971674	0.98887	0.997949	58.19	67.05	57.47	1.10795e+06	750076	1.8389e+06	5.44	36.17	42.65	High	High	Peak Found	High	High	Peak Found	High	High	High
AAS97583.1	3112	TPR domain protein	11.281	12	3	11	3	267	30.3	7.15	7.69	3	0	0.86	0.663	1.025	0.934211	0.87042	0.999667	29.54	50	45.74	759485	562475	514051	8.33	33.58	41.01	High	High	High	High	High	Peak Found	Peak Found	High	High
AAS97368.1	2896	TPR domain protein	23.737	7	7	16	7	1076	117.2	5.94	1.89	7	0	1.143	1.397	1.014	0.938474	0.93275	0.999667	46.53	65.4	46.12	922211	948802	761966	15.16	2.52	17.85	High	Peak Found	Peak Found	High	High	Peak Found	High	High	High
AAS97409.1	2937	TPR domain protein/response regulator receiver domain protein	64.928	39	15	60	15	451	51	6.65	76.71	15	0	0.818	1.114	1.492	0.777515	0.993965	0.905221	56.29	64.57	76.35	1.3313e+07	9.91113e+06	1.26907e+07	12.77	9.3	34.7	High	High	High	High	High	High	High	High	High
AAS97235.1	2763	TPR/GGDEF domain protein	102.335	32	24	81	24	891	98	8.54	85.1	24	0	0.858	1.144	1.234	0.867617	0.993965	0.984176	73.82	53.33	53.68	8.76866e+06	6.83006e+06	8.02445e+06	27.14	16.46	16.32	High	High	High	High	High	High	High	High	High
AAS96135.1	1658	transaldolase, putative	54.368	59	10	55	10	215	22.9	5.81	75.88	10	0	0.749	0.926	1.243	0.561173	0.96737	0.984176	47.34	56.77	40.94	9.52595e+06	5.60519e+06	7.03359e+06	26.5	9.99	19.88	High	High	High	High	High	High	High	High	High
AAS97395.1	2923	transcription antitermination protein NusG	64.076	53	11	65	11	183	21	8.85	84.4	11	0	1.128	1.307	0.901	0.795883	0.956732	0.954743	59.78	72.92	77.83	9.11893e+06	1.29511e+07	1.1503e+07	48.08	35.67	49.01	High	High	High	High	High	High	High	High	High
AAS97715.1	3245	transcription elongation factor GreA	33.093	53	6	21	6	163	18.1	4.96	32.07	6	0	2.199	5.387	1.885	0.199324	0.0087568	0.730157	75.26	56.73	47.33	418712	853708	3.18541e+06	74.16	28.16	18.15	Peak Found	High	High	High	High	High	High	High	High
AAS96049.1	1571	transcription termination factor Rho	103.033	50	17	127	17	429	48.1	7.2	149.81	17	0	1.018	0.757	0.754	0.952049	0.866896	0.842188	48.14	48.66	43.43	1.02093e+07	1.06646e+07	7.72428e+06	5.77	6.64	16.15	High	High	High	High	High	High	High	High	High
AAS94804.1	321	transcriptional activator, putative, Baf family	34.282	28	5	30	5	262	28	5.47	29.89	5	0	0.891	0.69	0.617	0.922412	0.845157	0.763948	54.36	65.38	70.6	2.75659e+06	2.7319e+06	1.26772e+06	17.56	38.14	49.75	High	High	High	High	High	High	High	High	High
AAS96792.1	2319	transcriptional regulator domain protein	3.786	9	2	4	2	218	23.8	8.54	0	2	0	1.096	0.837	0.674	0.971674	0.956195	0.896116	25.92	25.92	33.55	176726	187279	197023	12.23	24.9	31.91	High	Peak Found	Not Found	High	High	Not Found	Peak Found	Peak Found	High
AAS96851.1	2378	transcriptional regulator, AraC family	8.382	10	2	7	2	230	25.1	7.58	9.61	2	0	0.501	0.251	0.535	0.270112	0.104954	0.772681	24.37	56.4	23.91	835393	399245	208322	59.08	2.78	15.27	High	High	Peak Found	High	High	Not Found	High	Peak Found	Peak Found
AAS95087.1	606	transcriptional regulator, ArsR family/methyltransferase, UbiE/COQ5 family	14.405	10	3	16	3	307	34.3	5.72	27.14	3	0	1.284	1.376	0.801	0.623627	0.937226	0.895806	47.88	67.2	85.72	1.24452e+06	6.35433e+06	1.59799e+06	4.17	15.75	43.9	High	High	High	High	High	High	High	High	High
AAS95624.1	1144	transcriptional regulator, Cro/CI family	39.645	32	6	27	6	255	28.1	5.76	20.93	6	0	1.616	2.131	1.959	0.586009	0.630332	0.693641	56.25	56.08	80.88	688788	665008	1.62304e+06	9.42	3.26	23.06	High	High	High	High	High	Not Found	High	High	High
AAS95422.1	942	transcriptional regulator, Fur family	24.264	49	6	20	6	144	16.5	7.47	25.76	6	0	1.079	0.983	1.052	0.948239	0.993965	0.99805	35.26	58.95	56.34	2.47845e+06	2.35737e+06	3.33777e+06	14.87	5.24	27.08	High	High	High	High	Peak Found	High	High	High	High
AAS97257.1	2785	transcriptional regulator, GntR family	13.352	15	4	6	4	237	27.5	6.3	5.37	4	0	0.849	0.312	0.382	0.922412	0.223376	0.509908	47.06	94.17	46.74	804720	710899	95417.4	12.35	10.46	8.04	High	High	High	High	Peak Found	Peak Found	Peak Found	High	Not Found
AAS97116.1	2644	transcriptional regulator, GntR family	29.037	32	6	20	6	223	25.2	7.12	35.68	6	0	0.701	0.488	0.619	0.575544	0.478978	0.803068	39.13	45.19	34.78	2.50671e+06	1.30376e+06	1.2147e+06	7.43	28.05	15.75	High	High	High	High	High	Peak Found	High	High	High
AAS94514.1	30	transcriptional regulator, GntR family	16.514	11	4	8	4	500	54.7	8.1	2.18	4	0	0.808	0.829	1.118	0.866809	0.964089	0.997848	52.32	58.92	40.66	575481	427990	383320	31.53	17.6	24.76	Peak Found	High	Peak Found	High	Peak Found	Not Found	Peak Found	High	High
AAS95809.1	1331	transcriptional regulator, LysR family	17.895	15	4	16	4	308	33.7	5.74	18.8	4	0	0.99	0.529	0.484	0.996749	0.592209	0.539772	42.61	26.26	28.25	2.41019e+06	2.48941e+06	1.20381e+06	32.13	27.15	15.48	High	High	High	High	High	High	High	High	High
AAS97555.1	3084	transcriptional regulator, putative	70.62	49	8	78	8	128	14.5	9.35	92.08	8	0	1.034	0.744	0.605	0.942506	0.845157	0.65202	49.09	64.53	56.4	2.79659e+07	2.93814e+07	1.76281e+07	22.27	15.32	7.7	High	High	High	High	High	High	High	High	High
AAS97551.1	3080	transcriptional regulator, putative	46.624	46	6	101	6	132	15.3	9.29	126.28	6	0	0.762	0.626	0.737	0.594489	0.666107	0.831894	37.96	33.52	47.65	3.78535e+07	3.03201e+07	2.0199e+07	4.91	13.34	13.93	High	High	High	High	High	High	High	High	High
AAS97019.1	2547	transcriptional regulator, putative	14.911	13	3	15	3	228	24.7	5.99	27.04	3	0	0.526	0.478	0.643	0.229142	0.573865	0.837839	77.13	31.03	70.13	1.29718e+06	873056	603643	9.1	14.94	15.78	High	High	High	Peak Found	High	High	High	High	High
AAS96999.1	2527	transcriptional regulator, putative	29.547	33	4	30	4	132	15.1	9.39	36.07	4	0	0.806	0.849	0.773	0.763573	0.949871	0.887869	38.97	30.07	46.12	3.23132e+06	2.77015e+06	2.5898e+06	22.97	40.25	11.77	High	High	High	High	High	High	High	High	High
AAS94752.1	269	transcriptional regulator, rrf2 protein, putative	11.631	20	3	10	3	165	18.1	6.52	17.43	3	0	1.31	1.653	1.364	0.793009	0.8244	0.935383	46.43	58.34	41.04	1.16527e+06	1.55669e+06	2.15336e+06	12.71	18.74	36.65	Peak Found	High	High	Peak Found	High	Not Found	High	High	High
AAS96167.1	1690	transcriptional regulator, TetR family	68.331	62	13	95	13	189	21.2	8.56	163.65	13	0	0.971	2.548	2.575	0.996749	0.250834	0.348892	88.1	69.82	78.15	1.27098e+07	1.45399e+07	3.26179e+07	16.19	39.55	20.28	High	High	High	High	High	High	High	High	High
AAS95110.1	629	transcriptional regulator, TetR family	33.409	34	6	35	6	186	21	8.48	54.78	6	0	0.798	2.163	2.663	0.745777	0.45466	0.350977	62.29	59.06	48	3.18453e+06	2.78415e+06	6.69633e+06	18.75	12.73	34.46	High	High	High	High	High	High	High	High	High
AAS97054.1	2582	transcriptional regulator, TetR family	68.033	54	10	62	10	195	22.4	8.6	77.41	10	0	0.922	2.234	2.481	0.949023	0.426402	0.3866	50.29	72.43	43.53	5.63587e+06	3.46617e+06	1.04894e+07	53.2	12.17	27.21	High	High	High	High	High	High	High	High	High
AAS95543.1	1063	transcriptional regulatory protein	52.292	25	10	44	10	479	52.4	5.97	45.74	10	0	1.281	0.864	0.646	0.62402	0.959635	0.717654	50.48	52.86	55.08	3.87756e+06	4.81341e+06	3.33754e+06	11.8	22.9	31.61	High	High	High	High	High	High	High	High	High
AAS96379.1	1903	transcription-repair coupling factor	33.375	10	9	21	9	1160	129.3	6.19	9.31	9	0	0.842	1.167	1.714	0.903612	0.993965	0.796345	54.66	59.19	87.27	1.17105e+06	828995	1.7755e+06	51.94	33.93	6.77	High	High	High	High	High	High	High	High	High
AAS94830.1	347	transferase, hexapeptide repeat family	31.165	42	7	26	7	223	23.8	10.23	17.96	7	0	0.809	0.958	1.082	0.832815	0.993965	0.998377	36.18	48.89	29.95	2.19586e+06	1.83667e+06	2.14779e+06	22.33	17.4	14.21	High	High	High	High	High	High	High	High	High
AAS95367.1	887	transglycosylase, putative	41.335	21	9	34	9	424	45.4	9.29	41.78	9	0	0.938	1.491	1.369	0.971674	0.887244	0.953073	76.88	59.57	46.94	1.07005e+07	1.27873e+07	7.38028e+06	60.01	21.3	7.78	High	High	High	High	High	High	High	High	High
AAS97002.1	2530	transketolase	133.632	35	21	158	21	664	71	6	222.51	21	0	0.889	1.271	1.346	0.929563	0.964364	0.964272	57.8	69.76	61.24	3.2721e+07	3.61277e+07	4.34267e+07	16.03	29.63	20.74	High	High	High	High	High	High	High	High	High
AAS95778.1	1300	translation elongation factor G	334.703	63	38	469	38	691	76	5.38	766.68	38	0	0.746	2.074	2.646	0.539852	0.503274	0.320953	59.55	76.83	82.75	6.89487e+07	6.35772e+07	9.79622e+07	13.42	12.69	12.78	High	High	High	High	High	High	High	High	High
AAS96276.1	1799	translation elongation factor G	32.342	18	9	21	9	682	73.9	5.35	7.49	9	0	1.202	1.394	1.081	0.887095	0.93275	0.997949	74.03	51.06	45.29	1.14908e+06	1.15864e+06	1.50179e+06	7.82	9.52	6.72	High	High	Peak Found	High	High	Peak Found	High	High	High
AAS95361.1	881	translation elongation factor G, putative	323.209	54	37	506	37	688	74.3	5.25	868.47	37	0	1.083	0.724	0.607	0.870738	0.819812	0.657701	63.28	62.88	61.79	1.17794e+08	1.32126e+08	6.16181e+07	20.45	40.3	28.9	High	High	High	High	High	High	High	High	High
AAS95353.1	873	translation elongation factor Ts	191.863	69	23	227	23	287	30.5	5.21	391.41	23	0	1.016	2.681	2.351	0.953718	0.203635	0.456862	63.31	68.7	66.09	2.61727e+07	2.7912e+07	6.7014e+07	21.51	31.89	17.07	High	High	High	High	High	High	High	High	High
AAS97392.1	2920	translation elongation factor Tu	353.739	70	29	1179	29	397	43.4	5.33	2520.95	29	0	1.03	0.899	0.789	0.942916	0.964089	0.88062	76.58	64.29	71.65	4.46663e+08	5.98984e+08	3.90367e+08	8	11.03	17.03	High	High	High	High	High	High	High	High	High
AAS94498.1	14	translation initiation factor IF-1	11.654	14	2	10	2	72	8.3	9.47	10.95	2	0	1.493	0.976	0.757	0.677828	0.993965	0.939359	73.43	95.55	83.76	619324	940249	718340	36.49	48.68	60.65	High	Peak Found	High	High	High	High	High	High	Peak Found
AAS94990.1	508	translation initiation factor IF-2	43.011	41	8	27	8	227	24.7	5.35	41.52	8	0	1.359	2.505	2.268	0.710194	0.330525	0.514555	65.77	43.59	81.21	1.34198e+06	2.0442e+06	3.14311e+06	6.98	33	31.75	High	High	High	High	High	High	High	High	High
AAS94990.1	508	translation initiation factor IF-2	389.641	48	49	460	49	1079	115.3	8.06	854.46	49	0	0.971	0.862	0.898	0.996749	0.94918	0.954649	46.66	59.79	58.52	8.55167e+07	8.23748e+07	6.80597e+07	3.07	6.76	11.71	High	High	High	High	High	High	High	High	High
AAS97009.1	2537	translation initiation factor IF-3	52.946	54	10	77	10	176	20.5	9.63	104.37	10	0	0.874	0.765	0.809	0.903612	0.870104	0.896116	49.42	41.87	60.96	1.30819e+07	1.33392e+07	1.02316e+07	54.99	24.17	10.4	High	High	High	High	High	High	High	High	High
AAS94568.1	84	translation initiation factor, aIF-2BI family, putative	34.457	24	7	27	7	350	37.9	6.1	22.28	7	0	0.662	1.32	2.937	0.366421	0.950681	0.223579	66.02	28.68	93.07	1.8357e+06	3.15797e+06	2.47818e+06	2.52	5.34	4.98	High	High	High	High	High	High	High	High	High
AAS97056.1	2584	transporter, CorA family	22.36	15	4	22	4	310	34.6	5.07	25.28	4	0	1.408	0.631	0.418	0.49816	0.793768	0.331251	33.7	79.81	34.56	2.12652e+06	3.29768e+06	1.33486e+06	14.85	19.9	26.64	High	High	High	High	High	High	High	High	High
AAS95246.1	766	transporter, putative	58.545	45	7	102	7	176	18.7	9.14	148.43	7	0	0.806	1.001	1.128	0.746539	0.993965	0.999667	35.65	49.86	44.13	2.19759e+07	1.99012e+07	2.10933e+07	22	11.01	9.35	High	High	High	High	High	High	High	High	High
AAS95812.1	1334	trigger factor	137.291	51	23	103	23	433	48.3	4.79	160.84	23	0	1.258	1.703	1.144	0.523044	0.758044	0.99805	68.95	73.29	63.04	1.38132e+07	1.30273e+07	2.06135e+07	15.14	22.08	35.89	High	High	High	High	High	High	High	High	High
AAS96154.1	1677	triosephosphate isomerase	34.332	22	5	23	5	251	26.6	5.24	47.96	5	0	0.763	3.316	2.494	0.744963	0.100947	0.397368	29.86	50.03	44.99	2.04787e+06	1.48254e+06	3.36001e+06	9.39	29.71	7.95	High	High	High	High	High	High	High	High	High
AAS95316.1	836	tRNA (guanine-N1)-methyltransferase	8.591	6	2	6	2	425	46.6	5.55	3.88	2	0	0.706	0.583	1.092	0.781891	0.770827	0.998377	49.31	53.9	42.01	469746	246761	227475	21.37	21.12	21.68	High	High	Peak Found	Peak Found	High	Not Found	High	High	Peak Found
AAS95559.1	1079	tRNA modification GTPase TrmE	51.019	29	10	32	10	457	48.2	5.14	21.72	10	0	1.449	1.412	0.907	0.400381	0.929307	0.972027	65.24	46.64	73.64	2.53973e+06	2.94085e+06	2.64172e+06	14.43	9.12	36.39	High	High	High	High	High	High	High	High	High
AAS94987.1	505	tRNA pseudouridine synthase B	19.674	20	4	11	4	304	32.9	7.65	15.24	4	0	1.322	1.744	1.075	0.777515	0.830619	0.997949	50.84	37.72	44.77	1.02695e+06	1.39295e+06	1.05668e+06	12.32	14.5	34.91	High	High	Peak Found	High	High	High	High	High	High
AAS95464.1	984	tRNA-i(6)A37 modification enzyme MiaB	22.549	17	6	13	6	449	49.8	6.29	4.2	6	0	0.979	0.807	0.94	0.985566	0.956732	0.997848	27.17	53.93	54.97	1.11853e+06	519227	669664	13.72	13.84	12.21	High	High	High	High	Peak Found	Not Found	High	High	High
AAS94954.1	471	tryptophan synthase, alpha subunit	56.724	42	7	44	7	257	27.3	5.05	58.93	7	0	0.454	0.843	2.248	0.00199427	0.937226	0.535825	54.62	46.4	88.64	8.5923e+06	4.79768e+06	6.99574e+06	8.18	9.34	13.28	High	High	High	High	High	High	High	High	High
AAS94953.1	470	tryptophan synthase, beta subunit	84.127	39	12	78	12	395	42.1	6.62	114.56	12	0	0.636	0.999	1.634	0.148463	0.993965	0.836097	60.64	59.69	44.56	1.65075e+07	1.21447e+07	1.58558e+07	7.02	17.19	19.76	High	High	High	High	High	High	High	High	High
AAS94569.1	85	tryptophan synthase, beta subunit	41.142	24	8	52	8	414	44.3	6.04	87.66	8	0	0.364	0.611	1.338	9.10814e-07	0.632722	0.964272	37.61	62.54	72.38	2.12655e+07	9.6483e+06	1.23271e+07	8.56	9.51	22.92	High	High	High	High	High	High	High	High	High
AAS96677.1	2204	tryptophanase	217.659	60	28	541	28	462	51.3	6.3	1047.29	28	0	0.904	0.579	0.621	0.942506	0.555522	0.677894	58.22	61.26	71.61	1.34763e+08	1.34363e+08	6.96437e+07	2.28	12.76	43.08	High	High	High	High	High	High	High	High	High
AAS96678.1	2205	tryptophan-specific transport protein	20.857	7	3	43	3	425	45.2	8.47	65.92	3	0	0.81	0.433	0.578	0.777515	0.189429	0.583756	57.9	47.21	79.89	7.58678e+06	6.39623e+06	3.10934e+06	6.72	21.54	22.95	High	High	High	High	High	High	High	High	High
AAS94626.1	142	tryptophanyl-tRNA synthetase	35.599	32	9	32	9	329	37.8	6.9	35.25	9	0	0.716	1.936	2.773	0.708029	0.65788	0.300118	60.15	69.02	106.84	1.2034e+06	648091	2.8509e+06	17.96	24.5	10.09	High	High	High	High	High	Peak Found	High	High	High
AAS94659.1	175	tungsten formylmethanofuran dehydrogenase family protein/molybdopterin binding protein	109.367	41	19	116	19	543	58.4	6.76	131.5	19	0	1.024	1.555	1.221	0.948239	0.846531	0.985375	62.48	54.6	61.84	1.56552e+07	1.42379e+07	2.07484e+07	19.25	23.14	9.72	High	High	High	High	High	High	High	High	High
AAS95522.1	1042	twin-arginine translocation protein TatB	34.147	32	3	25	3	122	13.1	6.18	46.14	3	0	0.66	1.261	2.005	0.539852	0.964364	0.664969	70.49	35.64	55.6	1.74445e+06	1.15193e+06	2.62239e+06	16.67	28.19	32.65	High	High	High	High	High	Not Found	High	High	High
AAS95845.1	1367	twin-arginine translocation protein, TatA/E family	18.707	25	2	16	2	65	7.1	5.36	21.86	2	0	0.712	0.45	0.644	0.605136	0.453202	0.833374	36.57	38.51	43.58	1.88311e+06	1.79618e+06	792824	38.94	32.66	61.79	High	High	High	High	High	Not Found	High	High	High
AAS95748.1	1270	twitching motility protein	21.094	18	6	15	6	426	47.6	6.44	10.21	6	0	0.572	1.142	1.237	0.425056	0.993965	0.976855	58.61	43.16	43.39	841291	631019	1.02613e+06	7.85	12.92	6.9	Peak Found	High	High	Peak Found	High	Not Found	High	High	High
AAS95740.1	1262	twitching motility protein PilT	14.087	10	3	11	3	369	40.9	6.32	12.48	3	0	1.45	0.412	0.34	0.329306	0.288913	0.104528	51.22	66.6	63.83	2.652e+06	4.43901e+06	1.26529e+06	37.11	15.92	7.04	High	High	High	High	High	High	High	High	Peak Found
AAS96186.1	1709	type I restriction-modification system, M subunit	20.733	10	4	12	4	506	57.8	5.16	15.36	4	0	1.868	1.512	0.791	0.229099	0.881856	0.905221	32.05	57.51	66.57	817598	1.52822e+06	3.3548e+06	24.58	7.7	17.38	High	High	High	High	High	Not Found	High	High	High
AAS95498.1	1018	type I secretion membrane fusion protein, HlyD family	42.763	21	8	37	8	448	50.7	6.61	57.93	8	0	0.88	1.424	1.574	0.903508	0.915515	0.86563	58.94	67.44	43.58	3.14031e+06	2.10944e+06	3.79669e+06	15.69	10.86	11.88	High	High	High	High	High	High	High	High	High
AAS95493.1	1013	type I secretion outer membrane protein, TolC family	333.978	79	31	755	31	456	50	5.49	1466.71	31	0	0.906	0.988	1.089	0.944842	0.993965	0.999667	51.12	47.78	52.34	2.00514e+08	1.94609e+08	2.08026e+08	5.74	12.49	6.34	High	High	High	High	High	High	High	High	High
AAS94430.1	A0020	type II restriction endonuclease, putative	36.807	31	6	36	6	246	27.2	7.46	47.1	6	0	0.741	1.69	1.467	0.708029	0.793085	0.905221	67.81	46.93	36.07	1.76956e+06	1.48363e+06	2.71145e+06	16.06	4.69	15.05	High	High	High	High	High	High	High	High	High
AAS96595.1	2122	type II/IV secretion system protein	3.945	9	2	4	2	477	52.6	6.28	0	2	0	0.835	1.264	1.493	0.925593	0.993965	0.950814	23.79	21.55	25.21	208112	195207	83190.9	12.82	15.63	20.93	Peak Found	High	Peak Found	High	Peak Found	Not Found	Peak Found	High	High
AAS94356.1	A0104	type III secretion inner membrane protein, HrcV family	18.785	10	5	14	5	697	76	6.83	4.35	5	0	1.111	1.398	1.358	0.962046	0.956732	0.950814	50.03	60.13	28.59	414735	440783	644072	11.57	2.62	12.8	High	High	Peak Found	Peak Found	High	Not Found	High	High	High
AAS94345.1	A0117	type III secretion lipoprotein	47.863	41	10	37	10	271	28.9	7.97	36.4	10	0	0.908	1.865	2.563	0.935944	0.664976	0.378117	38.88	50.72	78.01	3.20652e+06	2.39518e+06	4.1002e+06	17.76	13.14	22.14	High	High	High	High	High	High	High	High	High
AAS94464.1	A0118	type III secretion protein, YopL family	20.586	22	3	11	3	205	22.2	5.16	13.86	3	0	1.431	1.155	0.812	0.747365	0.993965	0.964502	63.73	76.34	43.72	546083	792302	473817	9.56	16.84	31.84	High	High	High	High	High	Not Found	High	High	High
AAS94351.1	A0111	type III secretion system protein, IpaC family, putative	23.927	20	4	20	4	298	32	6.23	7.67	4	0	1.14	1.072	1.088	0.922596	0.993965	0.998377	63.39	43.15	62.61	1.76006e+06	1.88139e+06	2.48518e+06	42.9	25.58	35.31	High	High	High	High	High	High	High	High	High
AAS94350.1	A0112	type III secretion system protein, YscC family	58.745	31	12	32	12	624	66.5	5.9	36.34	12	0	0.622	1.371	2.368	0.457912	0.937226	0.444146	78.9	50.91	65.35	1.36537e+06	979424	2.55645e+06	18.76	15.83	18.3	High	High	High	High	High	High	High	High	High
AAS94481.1	A0110	type III secretion system target, YopB family	25.398	21	5	28	5	335	34.2	5.17	27.13	5	0	1.008	2.453	2.46	0.996749	0.395072	0.404106	71.92	77.59	41.92	1.11067e+06	964087	2.42961e+06	14.37	6.14	24.69	High	High	High	High	High	Not Found	High	High	High
AAS95433.1	953	tyrosyl-tRNA synthetase	104.087	38	19	109	19	398	44.4	6.3	177.77	19	0	1.046	0.922	0.821	0.929563	0.966741	0.905221	44.7	47.6	48.47	1.21516e+07	1.42448e+07	1.30987e+07	12.89	12.99	21.88	High	High	High	High	High	High	High	High	High
AAS97644.1	3174	ubiquinone/menaquinone biosynthesis methlytransferase UbiE	47.416	32	7	46	7	258	28.4	7.15	59.85	7	0	0.945	1.041	1.02	0.970652	0.993965	0.984176	51.57	38.67	34.01	4.82545e+06	4.64811e+06	5.01878e+06	20.13	27.08	15.5	High	High	High	High	High	High	High	High	High
AAS96842.1	2369	UDP-3-O-(R-3-hydroxymyristoyl)-glucosamine N-acyltransferase	70.162	40	12	82	12	344	35.7	5.3	100.57	12	0	0.911	1.055	1.186	0.95033	0.993965	0.997848	63.16	44.8	53.34	1.21144e+07	1.17141e+07	1.33167e+07	6.11	13.07	12.91	High	High	High	High	High	High	High	High	High
AAS95838.1	1360	UDP-glucose 4-epimerase	37.513	23	6	52	6	331	36.1	6.35	55.49	6	0	1.192	0.904	0.571	0.777515	0.96737	0.562095	56.68	78.5	58.92	4.84743e+06	5.52927e+06	3.40525e+06	2.78	13.05	17.6	High	High	High	High	High	High	High	High	High
AAS96383.1	1907	UDP-glucose 6-dehydrogenase	142.956	50	21	167	21	445	48.4	5.59	257.14	21	0	0.788	0.535	0.653	0.694335	0.453198	0.730827	46.74	59.9	72.04	4.17475e+07	3.09106e+07	2.43937e+07	35.53	3.18	49.79	High	High	High	High	High	High	High	High	High
AAS97646.1	3176	UDP-glucose/GDP-mannose dehydrogenase family protein	120.158	48	19	148	19	440	47.8	5.69	181.61	19	0	0.997	0.716	0.612	0.971674	0.817705	0.665357	54.54	48.69	54.89	1.82644e+07	2.14432e+07	1.17325e+07	3.41	17.04	23.85	High	High	High	High	High	High	High	High	High
AAS96974.1	2502	UDP-N-acetylenolpyruvoylglucosamine reductase	16.979	12	3	12	3	296	31.1	6.68	8.84	3	0	0.536	1.07	1.791	0.3654	0.993965	0.772681	30.66	32.18	55.15	793964	416970	822005	6.21	10.93	18.19	High	High	High	High	Peak Found	Not Found	High	High	High
AAS97728.1	3258	UDP-N-acetylglucosamine 1-carboxyvinyltransferase	40.598	21	8	36	8	417	44.8	6.98	48.86	8	0	1.046	1.187	1.262	0.963668	0.992001	0.98323	41.02	55.64	38.42	2.97425e+06	2.69631e+06	3.82038e+06	4.84	19.74	22.64	High	High	High	High	High	High	High	High	High
AAS97140.1	2668	UDP-N-acetylglucosamine pyrophosphorylase, putative	64.88	39	12	42	12	455	48.2	6.6	50.04	12	0	1.119	1.304	1.113	0.88675	0.955519	0.999667	58.43	50.82	66.92	3.43519e+06	4.81271e+06	3.70101e+06	14.44	12.98	22.13	High	High	High	High	High	High	High	High	High
AAS96976.1	2504	UDP-N-acetylglucosamine--N-acetylmuramyl-(pentapeptide) pyrophosphoryl-undecaprenol N-acetylglucosamine transferase	26.034	22	7	16	7	365	38.3	9.39	17.6	7	0	0.911	1.008	1.132	0.944842	0.993965	0.985375	35.91	37.53	46.98	2.12651e+06	1.44684e+06	1.69688e+06	79.82	26.48	5.31	Peak Found	High	High	High	Peak Found	High	High	High	High
AAS96975.1	2503	UDP-N-acetylmuramate--alanine ligase	46.658	32	10	31	10	454	48.6	6.48	26.27	10	0	1.165	0.787	0.472	0.855425	0.921439	0.402182	43.55	60.41	44.85	2.5101e+06	3.11842e+06	2.13426e+06	21.55	9.14	22.75	High	High	High	High	High	High	High	High	High
AAS96978.1	2506	UDP-N-acetylmuramoylalanine--D-glutamate ligase	32.165	20	7	24	7	433	46.6	6.8	22.74	7	0	1.163	1.098	1.289	0.925593	0.993965	0.954743	35.06	41.85	60.3	1.14595e+06	937794	1.56483e+06	17.62	9.04	22.41	High	High	High	High	Peak Found	Not Found	High	High	High
AAS96981.1	2509	UDP-N-acetylmuramoylalanyl-D-glutamate-2,6-diaminopimelate ligase	20.673	13	4	11	4	486	51.8	6.48	8.77	4	0	1.787	4.409	1.833	0.510511	0.0787441	0.737328	43.41	70.05	86.03	373135	650167	1.66889e+06	29.14	26.64	18.14	Peak Found	High	Peak Found	Peak Found	High	High	High	High	High
AAS96980.1	2508	UDP-N-acetylmuramoyl-tripeptide--D-alanyl-D-alanine ligase	25.22	20	7	17	7	478	50	5.64	7.5	7	0	1.131	1.38	0.72	0.942506	0.951685	0.910685	17.97	61.29	51.57	889286	1.08853e+06	968355	8.11	4.26	1.87	High	High	High	High	Peak Found	High	High	High	High
AAS95349.1	869	undecaprenyl diphosphate synthase	18.799	20	3	11	3	247	27.7	6.55	9.79	3	0	1.098	3.023	2.681	0.96948	0.29954	0.379739	55.43	58.29	49.65	579050	647363	1.34752e+06	36.81	28.63	29.92	High	High	High	Peak Found	Peak Found	High	High	High	High
AAS94906.1	423	universal stress protein family	56.278	50	5	71	5	141	14.8	5.4	114.34	5	0	1.298	3.418	3.439	0.594489	0.0592269	0.105772	62.68	91.87	75.2	3.06308e+06	4.64133e+06	1.33556e+07	25.77	31.62	37.59	High	High	High	High	High	High	High	High	High
AAS94475.1	A0005	universal stress protein family	73.088	32	10	88	10	311	33.8	8.7	137.27	10	0	1.153	0.606	0.611	0.74978	0.62874	0.664969	64.76	50.09	64.43	1.31237e+07	1.50145e+07	8.13496e+06	2.68	13.87	8.41	High	High	High	High	High	High	High	High	High
AAS95373.1	893	universal stress protein family	96.295	65	12	149	12	160	17.3	6.32	251.04	12	0	1.17	0.761	0.634	0.708029	0.870056	0.70892	42.44	50.49	47.02	2.47921e+07	2.71672e+07	1.52947e+07	4.8	27.7	27.08	High	High	High	High	High	High	High	High	High
AAS94490.1	6	universal stress protein family	7.141	16	2	9	2	154	16.3	5.81	1.75	2	0	0.551	1.463	1.703	0.46904	0.93275	0.833374	119.96	96.98	50.47	579969	353221	690205	15.3	10.74	83.53	Peak Found	High	High	High	High	Not Found	High	High	Peak Found
AAS95510.1	1030	universal stress protein family	70.109	53	6	141	6	147	15.6	6.16	224.69	6	0	1.367	1.291	0.857	0.280136	0.964089	0.935383	73.69	56.59	66.54	3.38599e+07	5.24697e+07	3.76405e+07	20.48	32.43	18.23	High	High	High	High	High	High	High	High	High
AAS94744.1	261	universal stress protein family	134.989	47	14	259	14	308	34.4	6.65	408.79	14	0	1.093	1.088	0.902	0.857922	0.996521	0.956481	45.84	50.89	41.43	7.53001e+07	1.03931e+08	8.1208e+07	12.41	13.93	21.7	High	High	High	High	High	High	High	High	High
AAS96573.1	2100	universal stress protein family	95.321	66	10	278	10	138	14.7	6.93	652.77	10	0	0.929	1.073	1.289	0.966597	0.999187	0.976855	61.07	41.41	65.64	1.33172e+08	1.32945e+08	1.46748e+08	24.7	24.24	29.03	High	High	High	High	High	High	High	High	High
AAS95506.1	1026	uracil permease	20.683	11	5	24	5	419	43.4	8.57	26.13	5	0	0.763	1.113	1.653	0.665203	0.993965	0.833374	51.25	44.85	45.95	3.24393e+06	2.27398e+06	2.99817e+06	22.04	11.75	14.62	High	High	High	High	High	High	High	High	High
AAS95505.1	1025	uracil phosphoribosyltransferase	43.038	43	8	42	8	208	22.7	6.14	36.98	8	0	0.942	1.208	1.257	0.96174	0.990619	0.984176	50.1	49.72	55.77	5.16029e+06	5.2489e+06	6.10249e+06	12.61	37.82	30.47	High	High	High	High	High	High	High	High	High
AAS95351.1	871	uridylate kinase	68.167	35	8	61	8	238	25.7	7.31	97.75	8	0	0.865	0.559	0.65	0.882562	0.503274	0.730157	60.07	34.93	30.4	1.9183e+07	1.38076e+07	1.30475e+07	1.09	30.47	4.09	High	High	High	High	High	High	High	High	High
AAS95214.1	734	uroporphyrinogen III synthase/methyltransferase	98.087	32	16	121	16	503	54	6.27	157.72	16	0	0.99	0.685	0.746	0.971674	0.76796	0.833374	44.64	37.05	56.07	1.6622e+07	1.42741e+07	1.14712e+07	18.61	32.71	4.05	High	High	High	High	High	High	High	High	High
AAS95761.1	1283	UTP-glucose-1-phosphate uridylyltransferase	78.91	37	9	125	9	292	32.4	5.77	259.89	9	0	0.914	0.979	1.15	0.952046	0.993965	0.997949	56.05	46.52	56.12	3.9252e+07	3.32942e+07	3.99073e+07	25.49	10.95	15.78	High	High	High	High	High	High	High	High	High
AAS95720.1	1242	vacJ lipoprotein, putative	33.009	23	6	50	6	273	30.1	5.35	83.72	6	0	1.268	1.587	1.208	0.497526	0.830619	0.989483	57.59	59.32	38.52	8.25767e+06	8.80808e+06	9.82467e+06	65.55	20.79	25.61	High	High	High	High	High	High	High	High	High
AAS97628.1	3158	vacJ lipoprotein, putative	14.98	10	3	15	3	295	32.2	5.5	25.4	3	0	1.006	1.199	1.101	0.996128	0.992126	0.997949	40.79	45.75	30.65	3.04113e+06	1.88954e+06	2.21952e+06	30.24	18.57	18.7	High	High	High	High	High	Not Found	High	High	High
AAS95212.1	732	valyl-tRNA synthetase	145.581	35	27	138	27	884	99.8	5.92	163.33	27	0	0.952	1.645	1.876	0.984949	0.802021	0.730827	71.29	64.21	57.5	8.25642e+06	7.81199e+06	1.2732e+07	22.49	16.52	10.28	High	High	High	High	High	High	High	High	High
AAS96063.1	1585	vitamin B12-dependent methionine synthase family protein	101.226	28	20	61	20	804	84.2	5.38	78.75	20	0	1.312	1.24	0.933	0.507788	0.969212	0.972027	41.59	43.07	75.58	5.27675e+06	6.63271e+06	6.68112e+06	16.58	16.98	17.04	High	High	High	High	High	High	High	High	High
AAS96600.1	2127	von Willebrand factor type A domain protein	53.393	32	10	35	10	420	44.8	6.27	34.88	10	0	0.797	1.976	1.848	0.794001	0.623897	0.752573	56.69	66.56	68.67	1.97128e+06	2.26696e+06	4.16994e+06	11.22	27.21	47.43	High	High	Peak Found	High	High	High	High	High	High
AAS95546.1	1066	xanthine-guanine phosphoribosyltransferase	13.993	18	2	10	2	163	18.4	6.19	10.97	2	0	0.301	2.046	7.012	0.00662636	0.640741	0.00268765	276.62	46.11	218.19	760638	656268	1.73013e+06	19.29	11.76	30.88	High	High	Not Found	High	High	High	High	High	Peak Found
AAS96386.1	1910	YjeF-related protein	47.984	25	10	33	10	574	59.6	8.62	31.62	10	0	0.756	0.757	1.012	0.601361	0.895298	0.997848	62.13	69.64	74.49	4.47212e+06	2.78176e+06	3.39075e+06	8.8	15.45	12.78	High	High	High	High	High	High	High	High	High
AAS97853.1	3384	zinc resistance-associated protein	25.306	19	4	18	4	173	18.5	9.28	30.22	4	0	0.823	0.336	0.336	0.794001	0.167626	0.11217	88.38	114.65	105.33	2.55099e+06	4.27311e+06	883517	50.91	67.48	71.66	High	High	High	High	High	High	High	Peak Found	High
#N/A	#N/A	#N/A	13.622	25	3	6	3	167	19.2	6.04	6.2	3	0	0.632	1.766	4.006	0.636969	0.854882	0.131765	76.55	57.73	99.56	407403	481103	640691	32.14	60.84	23.32	Peak Found	High	Not Found	High	Peak Found	Peak Found	High	High	High
#N/A	#N/A	#N/A	27.998	45	4	34	4	110	11.4	4.42	73.57	4	0	1.171	0.615	0.4	0.708029	0.664976	0.179651	57.69	66.23	77.19	9.38614e+06	1.13918e+07	4.10866e+06	33.94	35.81	66.64	High	High	High	High	High	High	High	High	High
#N/A	#N/A	#N/A	15.083	20	3	12	3	175	19	7.28	10.96	3	0	0.981	3.032	3.309	0.971674	0.295888	0.213988	66.43	27.89	28.08	363029	239645	1.05959e+06	7.25	6.06	16.71	High	High	Peak Found	High	Peak Found	Not Found	High	High	High
#N/A	#N/A	#N/A	17.601	26	5	26	5	356	37.5	6.74	21.95	5	0	1.281	0.769	0.494	0.787301	0.930904	0.616353	56.78	80.64	68.82	1.57474e+06	1.94108e+06	765485	11.11	30.04	32.49	High	High	High	High	High	High	High	High	High
#N/A	#N/A	#N/A	52.994	46	13	31	13	419	46.7	8.43	25.18	13	0	1.035	1.463	2.073	0.974766	0.901395	0.63233	99.89	79.73	108.61	1.94859e+06	1.47282e+06	4.57274e+06	45	34.1	21.6	High	High	Peak Found	High	Peak Found	Peak Found	High	High	High
#N/A	#N/A	#N/A	16.373	41	2	14	2	78	8.6	4.25	21.05	2	0	2.829	4.804	1.987	0.0112667	0.0154901	0.677894	43.04	111.52	115.99	577627	1.45336e+06	3.46755e+06	68.88	5.49	72.24	High	High	High	High	High	Not Found	High	High	High
#N/A	#N/A	#N/A	10.66	17	2	9	2	151	16	6.32	4.1	2	0	0.82	1.446	1.868	0.914386	0.951685	0.833374	97.94	57.81	62.84	307359	142047	434918	47.51	54.26	49.03	High	High	Peak Found	High	Peak Found	Not Found	High	High	High
#N/A	#N/A	#N/A	11.86	13	3	12	3	228	25.9	8.65	14.09	3	0	1.156	1.376	0.774	0.920602	0.953611	0.943933	114.41	80.8	120.1	989226	1.58013e+06	1.11978e+06	25.58	10.22	17.92	High	High	High	High	Peak Found	Peak Found	High	High	High
#N/A	#N/A	#N/A	16.744	16	4	12	4	315	32.9	4.91	14.04	4	0	0.762	0.933	1.149	0.800907	0.993965	0.985375	31.05	41.05	28.05	1.02389e+06	913756	572315	8.42	11.13	32.76	High	High	High	High	High	Not Found	High	Peak Found	High
#N/A	#N/A	#N/A	38.27	78	7	43	7	96	11.2	5.34	70.55	7	0	0.553	0.965	1.187	0.0218255	0.992001	0.997848	72.36	61.75	53.3	1.32495e+07	8.55753e+06	1.23633e+07	41.26	25.66	18.13	High	High	High	High	High	High	High	High	High
#N/A	#N/A	#N/A	18.363	29	4	20	4	112	12.3	7.39	16.03	4	0	1.381	1.134	1.022	0.7061	0.993965	0.999667	31.84	63.63	34.44	1.42934e+06	1.64262e+06	1.48014e+06	19.65	38.28	8.85	High	High	High	High	High	High	High	High	High
#N/A	#N/A	#N/A	27.001	33	4	28	4	176	18.5	5.94	42.71	4	0	0.963	1.034	1.065	0.971674	0.993965	0.999667	40.98	40.06	27.99	3.53077e+06	2.12746e+06	3.51438e+06	8.72	8.69	2.51	High	High	High	High	High	High	High	High	High
